# Supplementary material for: The Tomato Transcription Factor SlNAC063 Is Required for Aluminum Tolerance by Regulating SlAAE3-1 Expression
Source: Front Plant Sci. 2022 Mar 15;13:826954. doi: 10.3389/fpls.2022.826954 (PMC8965521; doi:10.3389/fpls.2022.826954)
Supplement: Supplementary file 5 [file Table_1.xlsx]

## Sheet: Sheet1
Table S1. Primers used in this study.
Primer name	Primer sequence (5'-3')	Application
SlNAC063-qF	GTTATTTCTCATTGCCGAGGGTG	RT-qPCR assay
SlNAC063-qR	GGTACGTAATTCCGGGAATGAGT
SlFRD3-like2-qF	GAGGGTCATAGCGGTAACATTCT
SlFRD3-like2-qR	GACAGCTAATCCGTCAGCTAGAA
SlAAE3;1-qF	TAAGGGGGAAGTTTGTATTCGGG
SlAAE3;1-qR	AGAGTCCAAATAACCCACGTCTC
SlAAE3;2-qF	ATTCATCGTCACGCATAAAAGG
SlAAE3;2-qR	TCTTCAGGCATATACGCTGAAT
SlFDH-qF	GCAGCTCGTGCTATTGCTTC
SlFDH-qR	GCATTTTCTGCACAGCCCAA
SlLACS3-qF	CCAAGGAGAATATGTTGCCGTTG
SlLACS3-qR	CCAGGAACGAAGAGCTTCCATAT
SlGAPDH-qF	ACCACAAATTGCCTTGCTCCCTTG	Internal control
SlGAPDH-qR	ATCAACGGTCTTCTGAGTGGCTGT
SlACTIN-qF	AGGCAGGATTTGCTGGTGATGATGCT
SlACTIN-qR	ATACGCATCCTTCTGTCCCATTCCGA
SlNAC063-GFP-F	GAGCTCGGTAcccgggATGGGTGTTCAAGAAATGGATC	Subcellular localization assay
SlNAC063-GFP-R	CTCACCATGTCGACtctagaCCCAGTAAAACCCATATTTACT
SlNAC063-BK7-F	AGAGGAGGACCTGcatatgATGGGTGTTCAAGAAATGGAT	Transactivation potential assay in yeast
SlNAC063-BK7-R	GCCGCTGCAGgtcgacTTACCCAGTAAAACCCATATTTACT
SlNAC063N-BK7-F	AGAGGAGGACCTGcatatgATGGGTGTTCAAGAAATGGAT
SlNAC063N-BK7-R	GCCGCTGCAGgtcgacGAGCCTGTATTCGTGCATAATC
SlNAC063C-BK7-F	AGAGGAGGACCTGcatatgAGTGAACCTACAACGAAAACTG
SlNAC063C-BK7-R	GCCGCTGCAGgtcgacTTACCCAGTAAAACCCATATTTA
SlNAC063C∆1-BK7-R	GCCGCTGCAGgtcgacCTTCTTGTAAATCCTACATAGAACC
SlNAC063C∆2-BK7-R	GCCGCTGCAGgtcgacATGACTTATATCCTTGTTCTGTAAAT
SlNAC063C∆3-BK7-R	GCCGCTGCAGgtcgacAGATTCCAGCATATCATCAAAC
SlNAC063C∆4-BK7-R	GCCGCTGCAGgtcgacCCCAGAGCTCAATTGTTGA
SlNAC063C∆5-BK7-R	GCCGCTGCAGgtcgacTGGAACTTGATTTCCGGTAC
SlNAC063-DT1-BsF	ATATATGGTCTCGATTGAGCTCTGGGAACTTCGATTGTT	Generate CRISPR/Cas9-induced knockout vertor for SlNAC063
SlNAC063-DT1-F0	TGAGCTCTGGGAACTTCGATTGTTTTAGAGCTAGAAATAGC
SlNAC063-DT2-R0	AACCCTTCAAACTTAACTTCACCAATCTCTTAGTCGACTCTAC
SlNAC063-DT2-BsR	ATTATTGGTCTCGAAACCCTTCAAACTTAACTTCACC
SlNAC063-Msite-F	CTCGACGATTGGGTTCTATGTAGG	Detection for SlNAC063 KO lines
SlNAC063-Msite-R	CCCAGTAAAACCCATATTTACTGTTT
OFF1-F	AGTAATCAGTGATCTGTGAAGTTCAGTTTGT	off-target effects assay
OFF1-R	CACTGCACCAATCAAATGCGG
OFF2-F	CGGTTCCTGATATATGTATTTCCAAC
OFF2-R	ATTCAAATGGGTTGTCATTTGAGA
OFF3-F	CTCATGTGACACTTTTTTCCCC
OFF3-R	GAATTGAAGTCCAGAGATAACGC
OFF4-F	CTTCCTGGAAGATCATAAAGTACCTAAT
OFF4-R	GTTCTGAGTACTCATTGAAGTGAG
OFF5-F	ATCTCTATATCTCTTCCGTTCTGC
OFF5-R	CCAAAACCCACATGGGAAAAT
OFF6-F	CAGTTGAAATATGGTGCTAAGAAGAG
OFF6-R	CATAACCTTGAGCTATAAACCCTG
OFF7-F	CACAGCTTCCCTGTAATATTTTG
OFF7-R	TGTTCACCAATAGCAACAGC
OFF8-F	GGCTTGTATAGATCAAGAACAACA
OFF8-R	GACCATCCATAGCCTTTTCTTC
OFF9-F	AGACAACACTTGCTAAGGCG
OFF9-R	GCTGCAATTTGTTTTCCGAC
OFF10-F	GGAGAAACTACTTAAAAGTACCAATAGT
OFF10-R	TACTGAGTAATTGGCAGCTCA
