# Supplementary material for: The Tomato Transcription Factor SlNAC063 Is Required for Aluminum Tolerance by Regulating SlAAE3-1 Expression
Source: Front Plant Sci. 2022 Mar 15;13:826954. doi: 10.3389/fpls.2022.826954 (PMC8965521; doi:10.3389/fpls.2022.826954)
Supplement: Supplementary file 6 [file Table_2.xlsx]

## Sheet: Sheet1
Table S2 Mutation analysis on the putative off-target sites in SlNAC063 KO lines.
Target	Target sequence(5'--3')	Putative off-target	Genome-wide off-target locus	Sequence of off-target site (5'--3')	Gene	region	mutation plants No.
sgRNA1	AGCTCTGGGAACTTCGATTGGG	OFF1	SL2.50ch12:+64996874	TGAATTCTGGGTAATTCGATTGG	Solyc12g095890.1	intron	0
		OFF2	SL2.50ch07:-67530017	TGAGGCCTGAGAACTGCGATTGG	Solyc07g065950.2	cds	0
		OFF3	SL2.50ch04:+59577786	GGGTTTTGGGAATTTCGATTGAG	Solyc04g072610.2	utr	0
sgRNA2	GTGAAGTTAAGTTTGAAGGAGG	OFF4	SL2.50ch02:+39652203	AAAAAGCTAAGTTTGAAGGAGG	Solyc02g069820.2	intron	0
		OFF5	SL2.50ch02:-43972031	GTGAAGTTAAATTTGAATGGGG	Solyc02g079390.2	cds	0
		OFF6	SL2.50ch01:+2011732	GGTAAGTTATGTTTGAAGGAAG	Solyc01g007850.2	cds	0
		OFF7	SL2.50ch09:-3771832	AGGAAGTTGGGTTTGAAGGAGG	Solyc09g010390.2	cds	0
		OFF8	SL2.50ch05:+61078386	GGGAAGATAAGTTTGGAGGGGG	Solyc05g050860.1	cds	0
		OFF9	SL2.50ch11:+54910914	AAAGTGAAGGAAAGTTTGAAGG	Solyc11g071430.1	cds	0
		OFF10	SL2.50ch04:+48267884	CAAGATGAAGTTTAGTTTGTTGG	Solyc04g050790.2	utr	0
The mismatched bases are indicated in red, and PAM is high-lighted in green.
