# Supplementary material for: The Tomato Transcription Factor SlNAC063 Is Required for Aluminum Tolerance by Regulating SlAAE3-1 Expression
Source: Front Plant Sci. 2022 Mar 15;13:826954. doi: 10.3389/fpls.2022.826954 (PMC8965521; doi:10.3389/fpls.2022.826954)
Supplement: Supplementary file 7 [file Table_3.xlsx]

## Sheet: Sheet1
Table S3. Summary of RNA-Sequencing of tomato root tips under Al stress for 7 d.
sample	raw_reads	clean_reads	clean_bases	total_map
nac063-Al_1	47948638	46614570	6.99G	44740277(95.98%)
nac063-Al_2	46611138	45202886	6.78G	43216513(95.61%)
nac063-Al_3	50845278	49546262	7.43G	47438961(95.75%)
nac063+Al_1	47479682	46275324	6.94G	44435780(96.02%)
nac063+Al_2	46596444	45803032	6.87G	43859091(95.76%)
nac063+Al_3	47870412	47046722	7.06G	45161126(95.99%)
WT-Al_1	48759896	47413848	7.11G	45287917(95.52%)
WT-Al_2	43857690	42516194	6.38G	40453676(95.15%)
WT-Al_3	46739506	44844770	6.73G	42638828(95.08%)
WT+Al_1	48406282	46523186	6.98G	44165356(94.93%)
WT+Al_2	43200758	42086124	6.31G	40217675(95.56%)
WT+Al_3	45835052	44512992	6.68G	42551963(95.59%)
