# Supplementary material for: The Tomato Transcription Factor SlNAC063 Is Required for Aluminum Tolerance by Regulating SlAAE3-1 Expression
Source: Front Plant Sci. 2022 Mar 15;13:826954. doi: 10.3389/fpls.2022.826954 (PMC8965521; doi:10.3389/fpls.2022.826954)
Supplement: Supplementary file 8 [file Table_4.xlsx]

## Sheet: Sheet1
Table S4. 191 DEGs after 7 d exposure to Al stress in tomato root apex
gene_id	AC+Al_1	AC+Al_2	AC+Al_3	AC-Al_1	AC-Al_2	AC-Al_3	AC+Al	AC-Al	log2FoldChange	pvalue	padj	gene_name	gene_chr	gene_start	gene_end	gene_strand	gene_length	gene_biotype	gene_description	tf_family
Solyc01g008420.2.ITAG2.4	136.975	126.917	123.924	2.77561	0	3.89998	129.272	2.2252	5.82412	9.5e-22	2.12e-17	Solyc01g008420.2	SL2.50ch01	2504346	2512080	+	1877	-	- && Q9SYD6.2 RecName: Full=Protein DETOXIFICATION 42; Short=AtDTX42; AltName: Full=Aluminum-activated citrate transporter; AltName: Full=AtMATE; AltName: Full=FRD-like protein; AltName: Full=Multidrug and toxic compound extrusion protein 42; Short=MATE protein 42 && PF01554:MatE	MatE
Solyc07g065090.1.ITAG2.4	1080.14	968.796	895.987	405.238	375.631	353.923	981.642	378.264	1.37556	7.14e-19	7.98e-15	Solyc07g065090.1	SL2.50ch07	66998756	66999739	-	984	-	- && Q9M5J9.1 RecName: Full=Polygalacturonase inhibitor 1; AltName: Full=Polygalacturonase-inhibiting protein 1; Short=PGIP-1; Flags: Precursor && PF13855:Leucine rich repeat|PF08263:Leucine rich repeat N-terminal domain	LRRNT_2
Solyc04g056620.1.ITAG2.4	2491.96	2321.51	2275.87	1073.23	1038.76	879.446	2363.11	997.146	1.24481	4.74e-18	3.53e-14	Solyc04g056620.1	SL2.50ch04	54597208	54600807	-	1044	-	- && Q9FFD0.2 RecName: Full=Auxin efflux carrier component 5; Short=AtPIN5 && PF03547:Membrane transport protein	-
Solyc12g088000.1.ITAG2.4	2864.73	2936	3243.65	1444.24	1327.3	1219.72	3014.79	1330.42	1.18008	1.67e-17	9.31e-14	Solyc12g088000.1	SL2.50ch12	63493179	63498791	+	1272	-	- && Q9FN30.1 RecName: Full=Probable aminotransferase TAT2; AltName: Full=Tyrosine aminotransferase 2 && PF00155:Aminotransferase class I and II	Aminotran_1_2
Solyc02g082920.2.ITAG2.4	227.965	204.124	236.045	61.0633	69.2504	53.6247	222.711	61.3128	1.86323	2.57e-17	1.15e-13	Solyc02g082920.2	SL2.50ch02	46550982	46552140	+	1025	-	- && Q05539.1 RecName: Full=Acidic 26 kDa endochitinase; Flags: Precursor && PF00182:Chitinase class I	-
Solyc07g026650.2.ITAG2.4	773.907	822.842	824.19	360.829	323.169	286.649	806.979	323.549	1.31802	5e-17	1.86e-13	Solyc07g026650.2	SL2.50ch07	30139957	30141385	-	1199	-	- && Q9ZUN4.1 RecName: Full=1-aminocyclopropane-1-carboxylate oxidase 1; Short=ACC oxidase 1; Short=AtACO1 && PF03171:2OG-Fe(II) oxygenase superfamily|PF14226:non-haem dioxygenase in morphine synthesis N-terminal	2OG-FeII_Oxy
Solyc04g048900.2.ITAG2.4	576.272	635.64	715.019	266.458	230.835	224.249	642.31	240.514	1.41643	4.22e-16	1.35e-12	Solyc04g048900.2	SL2.50ch04	38565211	38568669	+	1513	-	- && O04153.2 RecName: Full=Calreticulin-3; AltName: Full=Protein PRIORITY IN SWEET LIFE 1; Flags: Precursor && PF00262:Calreticulin family	-
Solyc04g040130.1.ITAG2.4	187.851	209.412	279.32	49.0357	50.364	29.2499	225.528	42.8832	2.3958	2.03e-15	5.68e-12	Solyc04g040130.1	SL2.50ch04	12032700	12033827	+	1128	-	- && Q8GZC3.1 RecName: Full=Delta(12)-fatty-acid desaturase FAD2 && PF11960:Domain of unknown function (DUF3474)|PF00487:Fatty acid desaturase	-
Solyc02g093230.2.ITAG2.4	675.089	669.485	733.706	285.887	294.839	331.498	692.76	304.075	1.18811	2.85e-15	7.09e-12	Solyc02g093230.2	SL2.50ch02	54162173	54163557	-	1050	-	- && Q8H9B6.1 RecName: Full=Caffeoyl-CoA O-methyltransferase; AltName: Full=Trans-caffeoyl-CoA 3-O-methyltransferase; Short=CCoAMT; Short=CCoAOMT && PF01596:O-methyltransferase	-
Solyc09g072810.2.ITAG2.4	350.264	336.329	399.309	138.78	100.728	117.974	361.967	119.161	1.60078	4.41e-15	9.85e-12	Solyc09g072810.2	SL2.50ch09	65509994	65514022	+	3925	-	- && Q8VZG8.3 RecName: Full=MDIS1-interacting receptor like kinase 2; Short=AtMIK2; AltName: Full=Probable LRR receptor-like serine/threonine-protein kinase At4g08850; Flags: Precursor && PF00069:Protein kinase domain|PF13855:Leucine rich repeat	Pkinase
Solyc10g078220.1.ITAG2.4	121.32	131.147	216.374	28.6813	19.9357	14.6249	156.281	21.0806	2.88649	4.38e-14	8.91e-11	Solyc10g078220.1	SL2.50ch10	60074003	60076372	-	1521	-	- && O22203.1 RecName: Full=Cytochrome P450 98A3; AltName: Full=Protein REDUCED EPIDERMAL FLUORESCENCE 8; AltName: Full=p-coumaroylshikimate/quinate 3'-hydrolxylase; Short=C3'H && PF00067:Cytochrome P450	p450
Solyc12g100260.1.ITAG2.4	184.916	224.219	211.457	64.7641	70.2997	51.6748	206.864	62.2462	1.73344	7.69e-14	1.41e-10	Solyc12g100260.1	SL2.50ch12	67039003	67039167	+	165	-	- && P48630.1 RecName: Full=Omega-6 fatty acid desaturase, endoplasmic reticulum isozyme 1 && -	-
Solyc01g109390.2.ITAG2.4	2460.65	3017.44	3112.84	1360.05	1292.67	1226.54	2863.64	1293.09	1.14693	8.19e-14	1.41e-10	Solyc01g109390.2	SL2.50ch01	96361928	96362671	+	744	-	- && - && PF14368:Probable lipid transfer	-
Solyc02g067440.2.ITAG2.4	518.547	609.199	614.7	206.32	223.49	265.199	580.815	231.67	1.3261	2.63e-13	4.2e-10	Solyc02g067440.2	SL2.50ch02	37626191	37629865	-	1182	-	- && Q8LGJ5.1 RecName: Full=Plant cysteine oxidase 2 && PF07847:Protein of unknown function (DUF1637)	-
Solyc03g096550.2.ITAG2.4	2332.48	2264.4	2627.97	971.462	1103.81	1235.32	2408.28	1103.53	1.12607	8e-13	1.19e-09	Solyc03g096550.2	SL2.50ch03	58703158	58704319	+	821	-	- && O65660.1 RecName: Full=PLAT domain-containing protein 1; Short=AtPLAT1; Short=PLAT domain protein 1; Flags: Precursor && PF01477:PLAT/LH2 domain	-
Solyc05g009580.2.ITAG2.4	61.6386	65.5735	65.8959	178.564	193.062	257.399	64.3693	209.675	-1.70385	5.26e-12	6.91e-09	Solyc05g009580.2	SL2.50ch05	3773293	3777228	+	1675	-	- && Q9LS46.1 RecName: Full=Aluminum-activated malate transporter 9; Short=AtALMT9 && PF11744:Aluminium activated malate transporter	-
Solyc01g100370.2.ITAG2.4	624.213	977.257	892.053	305.317	300.085	295.424	831.174	300.275	1.46856	5.97e-12	7.41e-09	Solyc01g100370.2	SL2.50ch01	90425251	90427866	+	945	-	- && - && PF00582:Universal stress protein family	Usp
Solyc04g071580.2.ITAG2.4	1285.6	1249.07	1346.44	265.533	375.631	526.498	1293.7	389.221	1.73321	1.6e-11	1.88e-08	Solyc04g071580.2	SL2.50ch04	58548409	58549219	+	699	-	- && Q08655.1 RecName: Full=Abscisic stress-ripening protein 1 && PF02496:ABA/WDS induced protein	-
Solyc01g079940.2.ITAG2.4	2218.99	2162.87	2072.28	1199.99	906.551	999.37	2151.38	1035.3	1.05477	3.2e-11	3.58e-08	Solyc01g079940.2	SL2.50ch01	79094809	79097005	-	1584	-	- && P13917.2 RecName: Full=Basic 7S globulin; AltName: Full=SBg7S; Short=Bg; Contains: RecName: Full=Basic 7S globulin high kDa subunit; Contains: RecName: Full=Basic 7S globulin low kDa subunit; Flags: Precursor && PF14543:Xylanase inhibitor N-terminal|PF14541:Xylanase inhibitor C-terminal	-
Solyc12g009650.1.ITAG2.4	612.472	1019.56	978.603	309.017	199.357	255.449	870.212	254.608	1.77199	3.99e-11	4.24e-08	Solyc12g009650.1	SL2.50ch12	2922153	2923552	-	798	-	- && Q00451.1 RecName: Full=36.4 kDa proline-rich protein && PF14547:Hydrophobic seed protein	-
Solyc10g007280.2.ITAG2.4	185.894	189.317	171.133	49.9609	68.2012	72.1497	182.115	63.4373	1.52396	1.27e-10	1.29e-07	Solyc10g007280.2	SL2.50ch10	1683212	1684934	-	1632	-	- && Q8VZG2.1 RecName: Full=Protein HYPER-SENSITIVITY-RELATED 4; Short=AtHSR4; AltName: Full=BCS1-like protein && PF00004:ATPase family associated with various cellular activities (AAA)|PF14363:Domain associated at C-terminal with AAA	AAA
Solyc12g007270.1.ITAG2.4	276.884	259.121	221.292	104.548	61.9057	79.9496	252.433	82.1344	1.61612	2.36e-10	2.29e-07	Solyc12g007270.1	SL2.50ch12	1685022	1687362	+	882	-	- && Q9SVV2.1 RecName: Full=Probable xyloglucan endotransglucosylase/hydrolase protein 26; Short=At-XTH26; Short=XTH-26; Flags: Precursor && PF06955:Xyloglucan endo-transglycosylase (XET) C-terminus|PF00722:Glycosyl hydrolases family 16	-
Solyc01g107710.2.ITAG2.4	148.715	72.977	106.22	773.469	308.479	850.196	109.304	644.048	-2.55819	3.17e-10	2.85e-07	Solyc01g107710.2	SL2.50ch01	95161978	95163587	+	1270	-	- && - && PF06830:Root cap	-
Solyc12g006680.1.ITAG2.4	92.9471	170.28	67.8629	16.6536	16.788	14.6249	110.363	16.0222	2.78282	3.21e-10	2.85e-07	Solyc12g006680.1	SL2.50ch12	1144017	1145010	-	288	-	- && Q02921.1 RecName: Full=Early nodulin-93; Short=N-93 && -	-
Solyc07g006090.1.ITAG2.4	128.169	101.533	179.984	21.2796	38.8222	24.3749	136.562	28.1589	2.285	3.31e-10	2.85e-07	Solyc07g006090.1	SL2.50ch07	942872	945412	+	786	-	- && Q9M0A5.1 RecName: Full=Gamma-glutamyl peptidase 3 && PF00117:Glutamine amidotransferase class-I	GATase
Solyc08g078650.2.ITAG2.4	44.0276	62.4006	35.4067	2.77561	1.04925	0.974995	47.2783	1.59995	4.8581	4.4e-10	3.64e-07	Solyc08g078650.2	SL2.50ch08	62408642	62414780	-	1901	-	- && Q8VZP6.1 RecName: Full=Putative glucuronosyltransferase PGSIP8; AltName: Full=Glycogenin-like protein 8; AltName: Full=Plant glycogenin-like starch initiation protein 8 && -	-
Solyc06g010030.2.ITAG2.4	418.751	474.879	597.98	191.517	181.52	229.124	497.203	200.72	1.3084	8.74e-10	6.98e-07	Solyc06g010030.2	SL2.50ch06	4786764	4792828	+	1946	-	- && Q94KB7.2 RecName: Full=MLO-like protein 6; Short=AtMlo6 && PF03094:Mlo family	-
Solyc08g077900.2.ITAG2.4	598.775	827.073	753.376	275.71	356.745	281.774	726.408	304.743	1.25382	9.5e-10	7.32e-07	Solyc08g077900.2	SL2.50ch08	61805319	61808521	+	1092	-	- && O23547.2 RecName: Full=Expansin-like B1; Short=At-EXPR1; Short=AtEXLB1; Short=AtEXPR1; AltName: Full=Ath-ExpBeta-3.1; Flags: Precursor && PF03330:Rare lipoprotein A (RlpA)-like double-psi beta-barrel|PF01357:Pollen allergen	-
Solyc11g040340.1.ITAG2.4	483.325	425.17	552.738	1140.77	904.453	1058.84	487.078	1034.69	-1.08688	1.31e-09	9.79e-07	Solyc11g040340.1	SL2.50ch11	37862898	37865065	+	1440	-	- && Q2V4L8.2 RecName: Full=Endoglucanase 3; AltName: Full=Cellulase 5; Short=AtCEL5; AltName: Full=Endo-1,4-beta glucanase 3; Flags: Precursor && PF00759:Glycosyl hydrolase family 9	-
Solyc01g106610.2.ITAG2.4	5223.63	5752.49	8065.85	2693.26	2721.75	2804.09	6347.32	2739.7	1.21215	1.38e-09	9.98e-07	Solyc01g106610.2	SL2.50ch01	94422765	94423740	+	976	-	- && Q08697.1 RecName: Full=Pathogenesis-related protein 1A1; Short=PR-1A1; Flags: Precursor && PF00188:Cysteine-rich secretory protein family	SCP
Solyc11g005860.1.ITAG2.4	43.0492	41.2479	68.8464	1.8504	7.34474	4.87498	51.0478	4.69004	3.46732	2.18e-09	1.52e-06	Solyc11g005860.1	SL2.50ch11	687944	690811	+	1965	-	- && - && PF00266:Aminotransferase class-V	Aminotran_5
Solyc01g005470.2.ITAG2.4	164.37	147.012	147.528	59.2129	66.1027	52.6498	152.97	59.3218	1.3685	2.68e-09	1.8e-06	Solyc01g005470.2	SL2.50ch01	322628	324932	-	750	-	- && Q9LQU4.1 RecName: Full=Protein PLANT CADMIUM RESISTANCE 2; Short=AtPCR2 && PF04749:PLAC8 family	-
Solyc03g045140.2.ITAG2.4	249.489	188.259	99.3355	43.4845	24.1327	18.5249	179.028	28.714	2.63629	2.74e-09	1.8e-06	Solyc03g045140.2	SL2.50ch03	11624234	11631716	-	2912	-	- && P31049.1 RecName: Full=Probable fatty acid methyltransferase; AltName: Full=ORF3; AltName: Full=S-adenosylmethionine-dependent methyltransferase; Short=AdoMet-MT; Short=SAM-MT && PF02353:Mycolic acid cyclopropane synthetase	-
Solyc02g091810.1.ITAG2.4	58.7034	61.343	67.8629	210.946	143.747	174.524	62.6364	176.406	-1.49521	3.21e-09	2.05e-06	Solyc02g091810.1	SL2.50ch02	53026570	53030310	+	957	-	- && Q9T072.2 RecName: Full=Transcription factor bHLH25; AltName: Full=Basic helix-loop-helix protein 25; Short=AtbHLH25; Short=bHLH 25; AltName: Full=Transcription factor EN 29; AltName: Full=bHLH transcription factor bHLH025 && PF00010:Helix-loop-helix DNA-binding domain	HLH
Solyc01g080020.2.ITAG2.4	161.434	215.758	201.622	430.219	384.025	475.798	192.938	430.014	-1.1574	3.87e-09	2.4e-06	Solyc01g080020.2	SL2.50ch01	79146733	79148363	-	1631	-	- && - && PF14543:Xylanase inhibitor N-terminal|PF14541:Xylanase inhibitor C-terminal	-
Solyc06g084070.2.ITAG2.4	181.981	179.798	212.44	83.2682	84.9892	74.0996	191.406	80.7857	1.2452	4.14e-09	2.5e-06	Solyc06g084070.2	SL2.50ch06	49326812	49327639	+	680	-	- && O24542.1 RecName: Full=Auxin-induced protein 22D; AltName: Full=Indole-3-acetic acid-induced protein ARG13 && PF02309:AUX/IAA family	-
Solyc11g005630.1.ITAG2.4	123.277	121.628	160.314	31.4569	41.97	50.6998	135.073	41.3755	1.70957	4.74e-09	2.79e-06	Solyc11g005630.1	SL2.50ch11	483096	485429	+	2334	-	- && Q25AG3.2 RecName: Full=G-type lectin S-receptor-like serine/threonine-protein kinase LECRK3; Short=OsLecRK3; AltName: Full=OsRLCK135; Flags: Precursor && PF00069:Protein kinase domain|PF01453:D-mannose binding lectin|PF00954:S-locus glycoprotein domain	Pkinase
Solyc07g053370.1.ITAG2.4	117.407	104.706	256.699	612.484	625.352	604.497	159.604	614.111	-1.94313	9e-09	5.16e-06	Solyc07g053370.1	SL2.50ch07	61825941	61826204	-	264	-	- && - && -	-
Solyc01g067860.2.ITAG2.4	1684.79	1401.37	2353.56	450.573	708.243	307.124	1813.24	488.647	1.89223	9.47e-09	5.29e-06	Solyc01g067860.2	SL2.50ch01	76839927	76841525	+	1299	-	- && Q9ZV04.1 RecName: Full=Peroxidase 24; Short=Atperox P24; AltName: Full=ATP47; Flags: Precursor && PF00141:Peroxidase	-
Solyc07g062480.1.ITAG2.4	73.3793	34.902	41.3078	4.62601	7.34474	2.92499	49.863	4.96525	3.34043	1.42e-08	7.7e-06	Solyc07g062480.1	SL2.50ch07	65201305	65202198	-	894	-	- && Q39688.1 RecName: Full=Epidermis-specific secreted glycoprotein EP1; AltName: Full=52/54 kDa medium protein; Flags: Precursor && PF01453:D-mannose binding lectin	B_lectin
Solyc09g091000.2.ITAG2.4	34.2437	117.398	44.2584	0.925202	1.04925	0	65.2999	0.65815	6.6394	1.51e-08	7.84e-06	Solyc09g091000.2	SL2.50ch09	70360338	70361437	+	793	-	- && P17642.1 RecName: Full=Pathogenesis-related protein STH-2 && PF00407:Pathogenesis-related protein Bet v I family	-
Solyc04g077230.1.ITAG2.4	1161.35	1228.97	1285.46	441.321	567.644	679.572	1225.26	562.846	1.12261	1.54e-08	7.85e-06	Solyc04g077230.1	SL2.50ch04	62173911	62174135	+	225	-	- && - && -	-
Solyc02g079500.2.ITAG2.4	35.222	31.7291	57.0442	1.8504	5.24625	3.89998	41.3318	3.66554	3.51494	2.01e-08	9.99e-06	Solyc02g079500.2	SL2.50ch02	44040159	44042618	-	1316	-	- && P15003.1 RecName: Full=Suberization-associated anionic peroxidase 1; AltName: Full=TMP1; Flags: Precursor && PF00141:Peroxidase	-
Solyc07g054780.1.ITAG2.4	245.576	206.239	190.803	62.9137	74.4967	100.425	214.206	79.2783	1.43489	2.3e-08	1.12e-05	Solyc07g054780.1	SL2.50ch07	62984068	62984319	-	252	-	- && - && -	-
Solyc03g122340.2.ITAG2.4	378.637	304.6	264.567	102.697	100.728	150.149	315.935	117.858	1.42235	2.49e-08	1.16e-05	Solyc03g122340.2	SL2.50ch03	70218660	70223113	+	3088	-	- && O24371.1 RecName: Full=Linoleate 13S-lipoxygenase 3-1, chloroplastic; Flags: Precursor && PF00305:Lipoxygenase|PF01477:PLAT/LH2 domain	Lipoxygenase
Solyc02g079800.1.ITAG2.4	49.8979	39.1326	33.4397	4.62601	0	4.87498	40.8234	3.167	3.65736	2.49e-08	1.16e-05	Solyc02g079800.1	SL2.50ch02	44239311	44239622	-	312	-	- && - && -	-
Solyc06g064990.2.ITAG2.4	219.159	187.202	185.885	457.975	396.616	360.748	197.416	405.113	-1.03709	2.79e-08	1.27e-05	Solyc06g064990.2	SL2.50ch06	40529550	40531185	+	1190	-	- && Q9SSA7.2 RecName: Full=GDSL esterase/lipase 5; AltName: Full=Extracellular lipase 5; Flags: Precursor && PF00657:GDSL-like Lipase/Acylhydrolase	Lipase_GDSL
Solyc06g074990.1.ITAG2.4	578.229	531.992	739.607	226.674	209.85	313.949	616.609	250.158	1.30138	2.86e-08	1.28e-05	Solyc06g074990.1	SL2.50ch06	46490275	46493062	-	1581	-	- && Q9FJH8.1 RecName: Full=High affinity nitrate transporter 2.4; Short=AtNRT2:4 && PF07690:Major Facilitator Superfamily	MFS_1
Solyc09g011870.1.ITAG2.4	1538.03	1003.7	1025.81	440.396	495.246	556.722	1189.18	497.455	1.25761	2.91e-08	1.28e-05	Solyc09g011870.1	SL2.50ch09	5152436	5153608	-	1173	-	- && Q9LMR3.1 RecName: Full=Arogenate dehydrogenase 2, chloroplastic; AltName: Full=TyrAAT2; Flags: Precursor && PF02153:Prephenate dehydrogenase	-
Solyc11g006030.1.ITAG2.4	172.197	142.781	156.38	63.8389	43.0192	67.2747	157.119	58.0443	1.4335	3.86e-08	1.63e-05	Solyc11g006030.1	SL2.50ch11	840424	841716	-	1293	-	- && Q5PNY6.1 RecName: Full=U-box domain-containing protein 21; AltName: Full=Plant U-box protein 21 && PF04564:U-box domain	U-box
Solyc07g062490.1.ITAG2.4	519.525	435.747	293.089	176.714	125.91	115.049	416.12	139.224	1.5784	3.98e-08	1.65e-05	Solyc07g062490.1	SL2.50ch07	65208382	65209275	+	894	-	- && Q39688.1 RecName: Full=Epidermis-specific secreted glycoprotein EP1; AltName: Full=52/54 kDa medium protein; Flags: Precursor && PF01453:D-mannose binding lectin	B_lectin
Solyc11g006710.1.ITAG2.4	228.943	254.891	299.974	472.778	534.068	574.272	261.269	527.039	-1.01205	4.27e-08	1.74e-05	Solyc11g006710.1	SL2.50ch11	1308228	1311947	-	1755	-	- && Q9SQZ0.1 RecName: Full=Cationic amino acid transporter 7, chloroplastic; Flags: Precursor && PF13906:C-terminus of AA_permease|PF13520:Amino acid permease	-
Solyc03g098730.1.ITAG2.4	325.804	261.236	285.221	152.658	129.058	108.224	290.754	129.98	1.16097	8.03e-08	3.09e-05	Solyc03g098730.1	SL2.50ch03	61007420	61008160	-	741	-	- && P13087.3 RecName: Full=Miraculin; Short=MIR; Flags: Precursor && PF00197:Trypsin and protease inhibitor	-
Solyc03g007380.1.ITAG2.4	289.603	317.291	262.6	138.78	141.649	95.5495	289.832	125.326	1.2096	1e-07	3.79e-05	Solyc03g007380.1	SL2.50ch03	1929376	1930601	+	1062	-	- && Q8H0Y8.2 RecName: Full=Probable WRKY transcription factor 41; AltName: Full=WRKY DNA-binding protein 41 && PF03106:WRKY DNA -binding domain	WRKY
Solyc02g085880.1.ITAG2.4	59.6818	137.493	177.034	560.672	374.582	566.472	124.736	500.576	-2.00532	1.07e-07	3.99e-05	Solyc02g085880.1	SL2.50ch02	48668099	48670133	+	1491	-	- && Q9ZW95.1 RecName: Full=Cytokinin hydroxylase; AltName: Full=Cytochrome P450 35A2 && PF00067:Cytochrome P450	p450
Solyc01g006050.2.ITAG2.4	6.84873	5.28819	8.85168	44.4097	32.5267	48.7498	6.9962	41.8954	-2.57895	2.06e-07	7.42e-05	Solyc01g006050.2	SL2.50ch01	729095	730484	-	1390	-	- && - && PF04819:Family of unknown function (DUF716)	-
Solyc01g005500.2.ITAG2.4	20.5462	25.3833	16.7198	0	0	0	20.8831	0	6.85209	2.16e-07	7.62e-05	Solyc01g005500.2	SL2.50ch01	344855	346514	+	967	-	- && Q94KL8.1 RecName: Full=Secoisolariciresinol dehydrogenase && PF00106:short chain dehydrogenase	adh_short
Solyc01g080480.2.ITAG2.4	47.9411	54.9972	58.0277	10.1772	16.788	11.6999	53.6553	12.8884	2.06595	2.18e-07	7.62e-05	Solyc01g080480.2	SL2.50ch01	79712302	79714399	+	1735	-	- && - && PF03372:Endonuclease/Exonuclease/phosphatase family	Exo_endo_phos
Solyc01g095770.2.ITAG2.4	176.11	96.245	102.286	31.4569	31.4775	42.8998	124.88	35.278	1.8243	2.4e-07	8.25e-05	Solyc01g095770.2	SL2.50ch01	86959607	86963216	-	2340	-	- && Q9LD40.2 RecName: Full=Putative cyclic nucleotide-gated ion channel 13; AltName: Full=Cyclic nucleotide- and calmodulin-regulated ion channel 13 && PF00520:Ion transport protein	Ion_trans
Solyc01g107090.2.ITAG2.4	313.085	252.775	255.715	105.473	100.728	148.199	273.858	118.133	1.21279	2.63e-07	8.91e-05	Solyc01g107090.2	SL2.50ch01	94729625	94730330	-	706	-	- && - && -	-
Solyc06g062420.2.ITAG2.4	429.513	438.92	465.205	211.871	212.998	121.874	444.546	182.248	1.28669	2.81e-07	9.39e-05	Solyc06g062420.2	SL2.50ch06	39372805	39373509	-	591	-	- && - && -	-
Solyc08g078700.2.ITAG2.4	135.018	150.185	95.4015	382.108	499.443	254.474	126.868	378.675	-1.57789	2.99e-07	9.84e-05	Solyc08g078700.2	SL2.50ch08	62469844	62471072	+	994	-	- && P11890.1 RecName: Full=Small heat shock protein, chloroplastic; Flags: Precursor && PF00011:Hsp20/alpha crystallin family	-
Solyc05g051530.2.ITAG2.4	1856.01	1846.64	2612.23	827.131	977.9	1139.77	2104.96	981.6	1.10075	3.22e-07	0.000104278	Solyc05g051530.2	SL2.50ch05	61891814	61894245	-	1867	-	- && Q8RXN0.1 RecName: Full=ABC transporter G family member 11; Short=ABC transporter ABCG.11; Short=AtABCG11; AltName: Full=Protein CUTICULAR DEFECT AND ORGAN FUSION 1; AltName: Full=Protein DESPERADO; AltName: Full=Protein PERMEABLE LEAVES 1; AltName: Full=White-brown complex homolog protein 11; Short=AtWBC11 && PF00005:ABC transporter|PF01061:ABC-2 type transporter	ABC2_membrane
Solyc02g092490.2.ITAG2.4	135.018	123.744	191.786	328.447	332.612	324.673	150.183	328.577	-1.12841	3.95e-07	0.000124153	Solyc02g092490.2	SL2.50ch02	53545308	53547848	-	1761	-	- && Q42381.1 RecName: Full=Probable N-acetyltransferase HLS1; AltName: Full=Protein CONSTITUTIVE PHOTOMORPHOGENIC 3; AltName: Full=Protein HOOKLESS 1; AltName: Full=Protein UNUSUAL SUGAR RESPONSE 2 && PF00583:Acetyltransferase (GNAT) family	Acetyltransf_1
Solyc01g091250.2.ITAG2.4	107.623	83.5534	32.4562	10.1772	14.6895	5.84997	74.5441	10.2389	2.86934	4.02e-07	0.000124153	Solyc01g091250.2	SL2.50ch01	84916935	84917934	-	840	-	- && - && PF07279:Protein of unknown function (DUF1442)	-
Solyc01g107820.2.ITAG2.4	375.702	377.577	245.88	128.603	130.107	161.849	333.053	140.186	1.248	4.58e-07	0.000137042	Solyc01g107820.2	SL2.50ch01	95232687	95234555	-	1869	-	- && Q9AT54.1 RecName: Full=Scopoletin glucosyltransferase; AltName: Full=Phenylpropanoid:glucosyltransferase 1 && PF00201:UDP-glucoronosyl and UDP-glucosyl transferase	UDPGT
Solyc07g044730.2.ITAG2.4	12.7191	6.34583	3.93408	49.9609	37.773	50.6998	7.66633	46.1445	-2.5868	4.6e-07	0.000137042	Solyc07g044730.2	SL2.50ch07	57778388	57781815	+	1405	-	- && Q9SHJ8.2 RecName: Full=3-hydroxyisobutyryl-CoA hydrolase-like protein 5 && PF16113:Enoyl-CoA hydratase/isomerase	-
Solyc07g006420.1.ITAG2.4	141.867	138.551	118.022	62.9137	55.6102	55.5747	132.813	58.0329	1.19283	5.03e-07	0.000146323	Solyc07g006420.1	SL2.50ch07	1238017	1238928	+	912	-	- && - && -	-
Solyc07g049660.2.ITAG2.4	122.299	159.703	338.331	34.2325	38.8222	62.3997	206.778	45.1515	2.19563	5.11e-07	0.000146323	Solyc07g049660.2	SL2.50ch07	60025565	60027595	+	1599	-	- && Q8GT20.1 RecName: Full=Benzyl alcohol O-benzoyltransferase; AltName: Full=Benzoyl coenzyme A:benzyl alcohol benzoyl transferase && PF02458:Transferase family	-
Solyc03g044300.2.ITAG2.4	395.27	475.937	288.171	175.788	151.092	175.499	386.459	167.46	1.20533	5.28e-07	0.000149334	Solyc03g044300.2	SL2.50ch03	8777728	8782356	+	1650	-	- && P47927.1 RecName: Full=Floral homeotic protein APETALA 2 && PF00847:AP2 domain	AP2
Solyc05g010020.2.ITAG2.4	45.0059	38.075	41.3078	11.1024	4.197	2.92499	41.4629	6.0748	2.75385	6.17e-07	0.000172473	Solyc05g010020.2	SL2.50ch05	4225071	4227064	-	502	-	- && - && -	-
Solyc06g074540.2.ITAG2.4	64.5738	56.0548	67.8629	120.276	192.013	176.474	62.8305	162.921	-1.37204	6.46e-07	0.000177051	Solyc06g074540.2	SL2.50ch06	46122903	46123868	+	428	-	- && Q8LA14.2 RecName: Full=Putative phytosulfokines 6; Short=AtPSK3_2; Short=AtPSK6; Contains: RecName: Full=Phytosulfokine-alpha-like; Short=PSK-alpha-like; Short=Phytosulfokine-a-like; Contains: RecName: Full=Phytosulfokine-beta; Short=PSK-beta; Short=Phytosulfokine-b; Flags: Precursor && PF06404:Phytosulfokine precursor protein (PSK)	-
Solyc04g081290.2.ITAG2.4	126.212	190.375	148.512	49.9609	48.2655	72.1497	155.033	56.792	1.4472	6.5e-07	0.000177051	Solyc04g081290.2	SL2.50ch04	65331682	65334990	+	1268	-	- && Q8RUN2.1 RecName: Full=Cytokinin riboside 5'-monophosphate phosphoribohydrolase LOG1; AltName: Full=Protein LONELY GUY 1 && PF03641:Possible lysine decarboxylase	-
Solyc03g034320.2.ITAG2.4	33.2653	43.3631	52.1266	9.25202	6.29549	9.74995	42.9183	8.43249	2.34104	7.6e-07	0.000204648	Solyc03g034320.2	SL2.50ch03	6064544	6068309	-	1408	-	- && O33341.1 RecName: Full=Putative glutamine amidotransferase Rv2859c && PF07722:Peptidase C26	-
Solyc08g061060.1.ITAG2.4	43.0492	60.2853	40.3243	97.1462	228.736	370.498	47.8863	232.127	-2.27805	7.71e-07	0.00020515	Solyc08g061060.1	SL2.50ch08	46476602	46477864	-	390	-	- && Q9ZV52.2 RecName: Full=EG45-like domain containing protein 2; AltName: Full=Plant natriuretic peptide A; Short=AtEXPR3; Short=AtPNP-A; Short=Ath-ExpGamma-1.2; Flags: Precursor && PF03330:Rare lipoprotein A (RlpA)-like double-psi beta-barrel	-
Solyc03g019690.1.ITAG2.4	302.323	223.162	475.04	135.079	101.777	83.8496	333.508	106.902	1.64098	8.68e-07	0.000228331	Solyc03g019690.1	SL2.50ch03	61452670	61453323	+	654	-	- && Q41433.1 RecName: Full=Probable serine protease inhibitor 6; AltName: Full=AM66; Flags: Precursor && PF00197:Trypsin and protease inhibitor	-
Solyc07g014730.2.ITAG2.4	327.761	352.193	278.336	152.658	182.569	131.624	319.43	155.617	1.03838	9.05e-07	0.000235283	Solyc07g014730.2	SL2.50ch07	5197542	5201173	+	835	-	- && Q8S8N6.1 RecName: Full=Phospholipase A2-alpha; AltName: Full=Secretory phospholipase A2-alpha; Short=AtsPLA2-alpha; Flags: Precursor && -	-
Solyc04g064880.2.ITAG2.4	798.366	843.995	1057.28	359.904	403.961	531.372	899.882	431.746	1.05973	1.07e-06	0.00027112	Solyc04g064880.2	SL2.50ch04	56039889	56041984	+	1003	-	- && P16273.2 RecName: Full=Pathogen-related protein && -	-
Solyc03g025720.2.ITAG2.4	72.4009	111.052	185.885	32.3821	22.0342	35.0998	123.113	29.8387	2.04219	1.13e-06	0.000284319	Solyc03g025720.2	SL2.50ch03	3134617	3138463	+	1977	-	- && Q9SMT7.1 RecName: Full=Oxalate--CoA ligase; AltName: Full=4-coumarate--CoA ligase isoform 8; Short=At4CL8; AltName: Full=4-coumarate--CoA ligase-like 10; AltName: Full=Acyl-activating enzyme 3; AltName: Full=Adenosine monophosphate binding protein 3; Short=AtMPBP3; AltName: Full=Oxalyl-CoA synthetase && PF00501:AMP-binding enzyme|PF13193:AMP-binding enzyme C-terminal domain	AMP-binding
Solyc11g069240.1.ITAG2.4	73.3793	111.052	82.6157	24.0553	35.6745	28.2749	89.0156	29.3349	1.60446	1.28e-06	0.000316844	Solyc11g069240.1	SL2.50ch11	53873154	53878403	+	1350	-	- && Q944L3.1 RecName: Full=Protein indeterminate-domain 9; AltName: Full=ID1-like zinc finger protein 1 && -	-
Solyc12g096840.1.ITAG2.4	63.5954	48.6513	52.1266	12.9528	9.44324	19.4999	54.7911	13.9653	1.96837	1.72e-06	0.000401184	Solyc12g096840.1	SL2.50ch12	65599549	65600393	-	708	-	- && Q9ZV06.1 RecName: Full=Probable acetyltransferase NATA1-like && PF00583:Acetyltransferase (GNAT) family	Acetyltransf_1
Solyc08g080670.1.ITAG2.4	6409.43	7294.53	11067.6	3908.98	3171.88	4023.81	8257.17	3701.55	1.15748	1.72e-06	0.000401184	Solyc08g080670.1	SL2.50ch08	63891123	63891875	-	753	-	- && P50703.1 RecName: Full=Osmotin-like protein OSML15; AltName: Full=PA15; Flags: Precursor && PF00314:Thaumatin family	Thaumatin
Solyc07g009310.2.ITAG2.4	153.607	137.493	280.303	432.995	549.807	560.622	190.468	514.474	-1.43263	2.03e-06	0.000467253	Solyc07g009310.2	SL2.50ch07	4358588	4359895	-	569	-	- && - && -	-
Solyc04g009780.1.ITAG2.4	108.601	136.435	142.61	57.3625	58.758	56.5497	129.216	57.5567	1.16654	2.15e-06	0.000489481	Solyc04g009780.1	SL2.50ch04	3087597	3088157	+	561	-	- && Q9FG21.1 RecName: Full=Putative RING-H2 finger protein ATL71; AltName: Full=RING-type E3 ubiquitin transferase ATL71 && PF13639:Ring finger domain	-
Solyc03g096540.2.ITAG2.4	2225.84	2236.9	2421.43	728.134	1281.13	1183.64	2294.72	1064.3	1.10877	2.33e-06	0.000526102	Solyc03g096540.2	SL2.50ch03	58700501	58702104	-	828	-	- && Q9SIE7.1 RecName: Full=PLAT domain-containing protein 2; Short=AtPLAT2; Short=PLAT domain protein 2; Flags: Precursor && PF01477:PLAT/LH2 domain	-
Solyc12g044940.1.ITAG2.4	339.501	301.427	385.54	132.304	142.698	201.824	342.156	158.942	1.10654	2.42e-06	0.000541752	Solyc12g044940.1	SL2.50ch12	37589458	37590437	-	816	-	- && Q9WYG0.1 RecName: Full=Uncharacterized oxidoreductase TM_0325 && PF00106:short chain dehydrogenase	adh_short
Solyc01g107080.2.ITAG2.4	178.067	134.32	175.067	84.1934	64.0042	52.6498	162.485	66.9491	1.27795	2.83e-06	0.000619133	Solyc01g107080.2	SL2.50ch01	94725240	94726747	-	1508	-	- && Q9SND9.1 RecName: Full=Uncharacterized acetyltransferase At3g50280 && PF02458:Transferase family	-
Solyc01g009930.1.ITAG2.4	63.5954	52.8819	70.8135	24.9805	13.6402	15.5999	62.4302	18.0735	1.78146	3.22e-06	0.00069119	Solyc01g009930.1	SL2.50ch01	4520578	4522877	-	1758	-	- && Q9C9H7.2 RecName: Full=Receptor-like protein 12; Short=AtRLP12; Flags: Precursor && PF13855:Leucine rich repeat	-
Solyc04g014320.1.ITAG2.4	34.2437	44.4208	58.0277	12.9528	10.4925	5.84997	45.564	9.7651	2.21953	4.22e-06	0.000885252	Solyc04g014320.1	SL2.50ch04	4605854	4606180	-	327	-	- && - && -	-
Solyc09g011990.1.ITAG2.4	143.823	126.917	194.737	70.3153	49.3147	68.2497	155.159	62.6266	1.307	4.24e-06	0.000885252	Solyc09g011990.1	SL2.50ch09	5263825	5265831	-	2007	-	- && O80939.1 RecName: Full=L-type lectin-domain containing receptor kinase IV.1; Short=Arabidopsis thaliana lectin-receptor kinase e; Short=AthlecRK-e; Short=LecRK-IV.1; AltName: Full=Lectin Receptor Kinase 1; Flags: Precursor && PF00069:Protein kinase domain|PF00139:Legume lectin domain	Pkinase
Solyc07g026680.2.ITAG2.4	36.2004	70.8617	66.8794	124.902	180.471	188.174	57.9805	164.516	-1.50563	4.66e-06	0.000947091	Solyc07g026680.2	SL2.50ch07	30225245	30226244	-	734	-	- && Q2V9B0.1 RecName: Full=Transcription factor MYB1R1; AltName: Full=Myb-related protein R1; Short=StMYB1R-1 && PF00249:Myb-like DNA-binding domain	Myb_DNA-binding
Solyc11g068940.1.ITAG2.4	36.2004	60.2853	43.2749	14.8032	5.24625	6.82497	46.5869	8.95815	2.36287	4.91e-06	0.000980417	Solyc11g068940.1	SL2.50ch11	53492962	53494233	-	1272	-	- && Q9SF15.1 RecName: Full=E3 ubiquitin-protein ligase PUB24; AltName: Full=Plant U-box protein 24; AltName: Full=U-box domain-containing protein 24 && PF04564:U-box domain	U-box
Solyc07g056200.2.ITAG2.4	138.931	169.222	117.039	48.1105	62.9549	68.2497	141.731	59.7717	1.24652	5.13e-06	0.00101389	Solyc07g056200.2	SL2.50ch07	64047159	64048119	-	733	-	- && - && -	-
Solyc11g056650.1.ITAG2.4	22.503	40.1902	32.4562	78.6422	86.0384	94.5746	31.7165	86.4184	-1.44958	5.63e-06	0.0011046	Solyc11g056650.1	SL2.50ch11	47291409	47293946	-	1326	-	- && Q66GR3.1 RecName: Full=Transcription factor bHLH130; AltName: Full=Basic helix-loop-helix protein 130; Short=AtbHLH130; Short=bHLH 130; AltName: Full=Transcription factor EN 69; AltName: Full=bHLH transcription factor bHLH130 && PF00010:Helix-loop-helix DNA-binding domain	HLH
Solyc10g083900.1.ITAG2.4	0.97839	2.11528	0.98352	22.2048	26.2312	17.5499	1.35906	21.9953	-4.03141	6.27e-06	0.0012079	Solyc10g083900.1	SL2.50ch10	63618304	63619293	-	603	-	- && Q4JL76.1 RecName: Full=Myb-related protein MYBAS2 && PF00249:Myb-like DNA-binding domain	Myb_DNA-binding
Solyc11g045530.1.ITAG2.4	27.3949	37.0173	36.3902	64.7641	134.304	121.874	33.6008	106.981	-1.66993	7.15e-06	0.00136633	Solyc11g045530.1	SL2.50ch11	30301333	30304063	-	516	-	- && Q9SHE9.1 RecName: Full=LOB domain-containing protein 4; AltName: Full=ASYMMETRIC LEAVES 2-like protein 6; Short=AS2-like protein 6 && PF03195:Protein of unknown function DUF260	-
Solyc05g052280.2.ITAG2.4	119.364	244.314	148.512	60.1381	68.2012	55.5747	170.73	61.3047	1.47723	7.4e-06	0.00140246	Solyc05g052280.2	SL2.50ch05	62559763	62562832	-	1266	-	- && Q9FLC0.1 RecName: Full=Peroxidase 52; Short=Atperox P52; AltName: Full=ATP49; Flags: Precursor && PF00141:Peroxidase	-
Solyc05g052670.1.ITAG2.4	48.9195	41.2479	70.8135	17.5788	10.4925	14.6249	53.6603	14.2321	1.90946	8.21e-06	0.00154148	Solyc05g052670.1	SL2.50ch05	62881105	62882490	-	1386	-	- && Q9FF86.1 RecName: Full=BAHD acyltransferase DCR; AltName: Full=Protein DEFECTIVE IN CUTICULAR RIDGES; AltName: Full=Protein PERMEABLE LEAVES 3 && PF02458:Transferase family	-
Solyc03g033840.2.ITAG2.4	132.083	156.53	159.33	82.343	72.3982	63.3747	149.314	72.7053	1.03676	9.28e-06	0.0017228	Solyc03g033840.2	SL2.50ch03	5443719	5446657	-	1901	-	- && Q8VZG2.1 RecName: Full=Protein HYPER-SENSITIVITY-RELATED 4; Short=AtHSR4; AltName: Full=BCS1-like protein && PF14363:Domain associated at C-terminal with AAA|PF00004:ATPase family associated with various cellular activities (AAA)	AAA
Solyc07g056610.1.ITAG2.4	29.3517	29.6139	25.5715	3.70081	7.34474	1.94999	28.179	4.33185	2.71873	1e-05	0.0018191	Solyc07g056610.1	SL2.50ch07	64428296	64431244	+	1167	-	- && - && PF14365:Domain of unknown function (DUF4409)|PF03080:Domain of unknown function (DUF239)	-
Solyc08g008080.1.ITAG2.4	19.5678	13.7493	31.4726	76.7918	72.3982	60.4497	21.5966	69.8799	-1.68954	1.13e-05	0.00203745	Solyc08g008080.1	SL2.50ch08	2554030	2554506	-	477	-	- && Q6NML0.1 RecName: Full=E3 ubiquitin-protein ligase ATL76; AltName: Full=RING-H2 finger protein ATL76; AltName: Full=RING-type E3 ubiquitin transferase ATL76 && PF13639:Ring finger domain	-
Solyc01g099620.2.ITAG2.4	42.0708	87.7839	131.792	18.504	19.9357	24.3749	87.2155	20.9382	2.05863	1.24e-05	0.00221367	Solyc01g099620.2	SL2.50ch01	89802245	89806344	-	2846	-	- && Q948T9.1 RecName: Full=Respiratory burst oxidase homolog protein B; AltName: Full=NADPH oxidase RBOHB; AltName: Full=StRBOHB && PF08030:Ferric reductase NAD binding domain|PF01794:Ferric reductase like transmembrane component|PF08022:FAD-binding domain|PF08414:Respiratory burst NADPH oxidase	FAD_binding_8
Solyc01g105720.2.ITAG2.4	695.635	754.096	1250.05	364.53	147.944	359.773	899.928	290.749	1.6293	1.36e-05	0.00238089	Solyc01g105720.2	SL2.50ch01	93787101	93789004	+	1681	-	- && - && -	-
Solyc11g005840.1.ITAG2.4	1024.37	1351.66	2353.56	592.129	564.496	712.722	1576.53	623.116	1.33917	1.53e-05	0.00259524	Solyc11g005840.1	SL2.50ch11	672662	674975	-	1968	-	- && - && PF00266:Aminotransferase class-V	Aminotran_5
Solyc05g009340.1.ITAG2.4	18.5894	32.7868	11.8022	61.0633	71.3489	99.4495	21.0595	77.2873	-1.88168	1.6e-05	0.00268208	Solyc05g009340.1	SL2.50ch05	3485275	3485631	-	357	-	- && - && -	-
Solyc03g119180.1.ITAG2.4	62.617	98.3603	135.726	267.383	217.195	241.799	98.901	242.126	-1.29221	1.91e-05	0.00316346	Solyc03g119180.1	SL2.50ch03	67856971	67857195	-	225	-	- && - && -	-
Solyc10g076290.1.ITAG2.4	662.37	719.194	1071.05	440.396	306.381	410.473	817.539	385.75	1.08313	1.95e-05	0.00316643	Solyc10g076290.1	SL2.50ch10	59224673	59229879	+	2028	-	- && Q8RWU5.1 RecName: Full=F-box/LRR-repeat protein 3 && -	-
Solyc01g109800.2.ITAG2.4	35.222	42.3055	87.5333	148.032	155.289	185.249	55.0203	162.857	-1.56425	1.98e-05	0.00318771	Solyc01g109800.2	SL2.50ch01	96662690	96663884	+	1195	-	- && - && -	-
Solyc08g006860.2.ITAG2.4	3658.2	1740.87	1521.51	6790.98	6446.59	5196.73	2306.86	6144.76	-1.41337	2.11e-05	0.00333216	Solyc08g006860.2	SL2.50ch08	1402460	1406481	+	1309	-	- && Q2MY60.1 RecName: Full=Patatin-02; AltName: Full=Patatin group A-1; Flags: Precursor && PF01734:Patatin-like phospholipase	-
Solyc11g018800.1.ITAG2.4	41.0924	24.3257	55.0771	8.32682	9.44324	8.77496	40.1651	8.84834	2.18666	2.12e-05	0.00333216	Solyc11g018800.1	SL2.50ch11	9597159	9598442	-	960	-	- && Q02200.1 RecName: Full=Lignin-forming anionic peroxidase; Flags: Precursor && PF00141:Peroxidase	-
Solyc04g054930.2.ITAG2.4	696.614	869.378	1442.82	479.255	391.37	421.198	1002.94	430.608	1.21962	2.15e-05	0.00336613	Solyc04g054930.2	SL2.50ch04	53438494	53441329	-	1541	-	- && Q5HZ05.1 RecName: Full=Probable trehalose-phosphate phosphatase J; Short=AtTPPJ; AltName: Full=Trehalose 6-phosphate phosphatase && PF02358:Trehalose-phosphatase	-
Solyc03g118900.1.ITAG2.4	347.329	329.983	407.177	229.45	143.747	139.424	361.496	170.874	1.07954	2.18e-05	0.00338921	Solyc03g118900.1	SL2.50ch03	67679782	67681818	+	1080	-	- && Q9LV20.1 RecName: Full=WAT1-related protein At3g18200 && PF00892:EamA-like transporter family	DUF6
Solyc08g077910.2.ITAG2.4	597.796	353.251	1566.75	282.187	161.584	132.599	839.265	192.123	2.12675	2.41e-05	0.00367551	Solyc08g077910.2	SL2.50ch08	61812783	61815044	+	1019	-	- && O23547.2 RecName: Full=Expansin-like B1; Short=At-EXPR1; Short=AtEXLB1; Short=AtEXPR1; AltName: Full=Ath-ExpBeta-3.1; Flags: Precursor && PF03330:Rare lipoprotein A (RlpA)-like double-psi beta-barrel|PF01357:Pollen allergen	-
Solyc12g096960.1.ITAG2.4	61.6386	69.8041	29.5056	9.25202	13.6402	15.5999	53.6494	12.8307	2.06613	2.42e-05	0.00367551	Solyc12g096960.1	SL2.50ch12	65664355	65665560	+	477	-	- && P17642.1 RecName: Full=Pathogenesis-related protein STH-2 && PF00407:Pathogenesis-related protein Bet v I family	-
Solyc09g082460.2.ITAG2.4	28.3733	19.0375	13.7693	72.1658	80.7922	48.7498	20.3934	67.2359	-1.71916	2.43e-05	0.00367551	Solyc09g082460.2	SL2.50ch09	68174127	68178867	-	1356	-	- && Q8LAX0.2 RecName: Full=Homocysteine S-methyltransferase 3; AltName: Full=S-methylmethionine:homocysteine methyltransferase 3; Short=AtHMT-3; Short=SMM:Hcy S-methyltransferase 3 && PF02574:Homocysteine S-methyltransferase	-
Solyc07g055690.1.ITAG2.4	771.95	867.263	1158.59	572.7	347.301	382.198	932.6	434.067	1.1027	2.48e-05	0.00371678	Solyc07g055690.1	SL2.50ch07	63632655	63634001	-	1347	-	- && O81905.1 RecName: Full=Receptor-like serine/threonine-protein kinase SD1-8; AltName: Full=Arabidopsis thaliana receptor kinase 3; AltName: Full=S-domain-1 (SD1) receptor kinase 8; Short=SD1-8; Flags: Precursor && PF00954:S-locus glycoprotein domain|PF01453:D-mannose binding lectin	B_lectin
Solyc12g019050.1.ITAG2.4	4.89195	3.17291	2.95056	25.9057	16.788	35.0998	3.67181	25.9312	-2.819	2.52e-05	0.00376018	Solyc12g019050.1	SL2.50ch12	9004310	9005978	+	1059	-	- && Q3EAR7.2 RecName: Full=Probable glycosyltransferase At3g42180 && PF03016:Exostosin family	-
Solyc03g116700.2.ITAG2.4	43.0492	48.6513	34.4232	11.1024	14.6895	10.7249	42.0412	12.1723	1.79177	2.54e-05	0.00376465	Solyc03g116700.2	SL2.50ch03	65992869	65993698	+	729	-	- && P29602.3 RecName: Full=Cucumber peeling cupredoxin; Short=CPC; AltName: Full=Stellacyanin && PF02298:Plastocyanin-like domain	Cu_bind_like
Solyc11g005710.1.ITAG2.4	64.5738	93.0721	89.5003	179.489	152.141	163.799	82.3821	165.143	-1.0055	2.61e-05	0.00383325	Solyc11g005710.1	SL2.50ch11	566242	568819	+	1968	-	- && Q498F0.1 RecName: Full=WD repeat-containing protein 44 && PF00400:WD domain, G-beta repeat	WD40
Solyc07g054770.1.ITAG2.4	21.5246	32.7868	25.5715	2.77561	5.24625	5.84997	26.6276	4.62394	2.53296	2.67e-05	0.00389237	Solyc07g054770.1	SL2.50ch07	62982491	62982760	-	270	-	- && - && -	-
Solyc01g100240.2.ITAG2.4	462.779	423.055	615.684	181.34	176.274	304.199	500.506	220.604	1.1819	2.68e-05	0.00389237	Solyc01g100240.2	SL2.50ch01	90311230	90315662	-	2355	-	- && C0SV51.1 RecName: Full=Calmodulin-binding protein 60 C && PF07887:Calmodulin binding protein-like	-
Solyc02g091380.1.ITAG2.4	122.299	101.533	67.8629	37.0081	41.97	31.1999	97.2316	36.726	1.40596	2.83e-05	0.00408152	Solyc02g091380.1	SL2.50ch02	52686196	52686513	-	318	-	- && - && -	-
Solyc12g006380.1.ITAG2.4	260.252	809.093	91.4674	73.091	60.8564	69.2247	386.937	67.724	2.51366	3.38e-05	0.004842	Solyc12g006380.1	SL2.50ch12	888715	890946	-	1095	-	- && P10967.1 RecName: Full=1-aminocyclopropane-1-carboxylate oxidase homolog; AltName: Full=Protein E8 && PF14226:non-haem dioxygenase in morphine synthesis N-terminal|PF03171:2OG-Fe(II) oxygenase superfamily	2OG-FeII_Oxy
Solyc06g069150.1.ITAG2.4	148.715	126.917	141.627	50.8861	30.4282	75.0746	139.086	52.1297	1.4131	3.42e-05	0.00486927	Solyc06g069150.1	SL2.50ch06	42929861	42930598	+	738	-	- && - && -	-
Solyc01g107720.2.ITAG2.4	29.3517	3.17291	16.7198	324.746	79.7429	401.698	16.4148	268.729	-4.03066	3.75e-05	0.00526742	Solyc01g107720.2	SL2.50ch01	95167673	95169171	+	1327	-	- && - && PF06830:Root cap	-
Solyc11g006240.1.ITAG2.4	45.0059	15.8646	20.6539	0.925202	0	4.87498	27.1748	1.93339	3.80175	4e-05	0.00551064	Solyc11g006240.1	SL2.50ch11	992150	992518	-	369	-	- && - && -	-
Solyc07g047990.1.ITAG2.4	27.3949	31.7291	26.555	84.1934	60.8564	67.2747	28.5597	70.7748	-1.31306	4.02e-05	0.00551064	Solyc07g047990.1	SL2.50ch07	59197872	59199345	+	873	-	- && Q6ICW6.1 RecName: Full=Probable serine/threonine-protein kinase WNK11; Short=AtWNK11; AltName: Full=Protein kinase with no lysine 11 && PF00069:Protein kinase domain	Pkinase
Solyc04g028380.1.ITAG2.4	27.3949	39.1326	47.209	126.753	113.319	71.1747	37.9122	103.749	-1.45309	4.31e-05	0.00580355	Solyc04g028380.1	SL2.50ch04	16336410	16337357	-	948	-	- && Q8L5A7.1 RecName: Full=Cytosolic sulfotransferase 15; Short=AtSOT15; AltName: Full=Sulfotransferase 2a; Short=AtST2a && PF00685:Sulfotransferase domain	Sulfotransfer_1
Solyc07g056000.2.ITAG2.4	864.897	519.3	320.628	84.1934	87.0877	257.399	568.275	142.893	1.99153	4.63e-05	0.00619387	Solyc07g056000.2	SL2.50ch07	63901549	63902824	+	1098	-	- && Q38911.1 RecName: Full=Xyloglucan endotransglucosylase/hydrolase protein 15; Short=At-XTH15; Short=XTH-15; Flags: Precursor && PF00722:Glycosyl hydrolases family 16|PF06955:Xyloglucan endo-transglycosylase (XET) C-terminus	-
Solyc01g089890.2.ITAG2.4	106.645	100.476	89.5003	29.6065	53.5117	21.4499	98.8735	34.856	1.51011	4.81e-05	0.00632263	Solyc01g089890.2	SL2.50ch01	83603930	83604697	-	768	-	- && - && PF03208:PRA1 family protein	-
Solyc03g070430.1.ITAG2.4	56.7466	95.1874	140.643	281.261	243.426	221.324	97.5258	248.67	-1.35061	4.88e-05	0.00637722	Solyc03g070430.1	SL2.50ch03	16259323	16259487	+	165	-	- && - && -	-
Solyc03g025670.2.ITAG2.4	12.7191	16.9222	4.9176	0	0	0	11.5196	0	5.99294	5.82e-05	0.00747541	Solyc03g025670.2	SL2.50ch03	3110742	3112107	+	758	-	- && - && PF06521:PAR1 protein	-
Solyc07g049670.2.ITAG2.4	47.9411	28.5562	35.4067	0	9.44324	5.84997	37.3014	5.09774	2.89573	6.38e-05	0.0080974	Solyc07g049670.2	SL2.50ch07	60029271	60030926	+	1580	-	- && Q8GT20.1 RecName: Full=Benzyl alcohol O-benzoyltransferase; AltName: Full=Benzoyl coenzyme A:benzyl alcohol benzoyl transferase && PF02458:Transferase family	-
Solyc09g090970.2.ITAG2.4	15.6542	21.1528	16.7198	1.8504	0	0	17.8423	0.616801	4.78092	6.49e-05	0.00820135	Solyc09g090970.2	SL2.50ch09	70346085	70347506	-	794	-	- && P17642.1 RecName: Full=Pathogenesis-related protein STH-2 && PF00407:Pathogenesis-related protein Bet v I family	-
Solyc02g082910.2.ITAG2.4	165.348	139.608	226.21	81.4178	93.3832	81.8996	177.055	85.5669	1.05093	6.57e-05	0.00824272	Solyc02g082910.2	SL2.50ch02	46541550	46545952	-	1815	-	- && F4HUK6.1 RecName: Full=Probable acyl-activating enzyme 1, peroxisomal; AltName: Full=AMP-binding protein 1; Short=AtAMPBP1 && PF13193:AMP-binding enzyme C-terminal domain|PF00501:AMP-binding enzyme	AMP-binding
Solyc04g074470.1.ITAG2.4	953.93	881.012	894.02	320.12	306.381	610.347	909.654	412.283	1.14155	7.04e-05	0.00873792	Solyc04g074470.1	SL2.50ch04	60453784	60454713	+	930	-	- && Q9FE06.1 RecName: Full=Protein EXORDIUM-like 2; Flags: Precursor && PF04674:Phosphate-induced protein 1 conserved region	-
Solyc05g005680.2.ITAG2.4	96.8606	112.11	90.4839	52.7365	48.2655	32.1748	99.818	44.3923	1.16771	7.81e-05	0.00943687	Solyc05g005680.2	SL2.50ch05	506438	508385	+	1323	-	- && Q8LC45.2 RecName: Full=Probable xyloglucan endotransglucosylase/hydrolase protein 33; Short=At-XTH33; Short=XTH-33; Flags: Precursor && PF06955:Xyloglucan endo-transglycosylase (XET) C-terminus|PF00722:Glycosyl hydrolases family 16	-
Solyc12g096570.1.ITAG2.4	59.6818	82.4957	59.0112	33.3073	15.7387	16.5749	67.0629	21.8736	1.60755	8.46e-05	0.0100988	Solyc12g096570.1	SL2.50ch12	65429769	65430125	-	357	-	- && - && -	-
Solyc06g076550.2.ITAG2.4	178.067	140.666	104.253	64.7641	53.5117	72.1497	140.995	63.4752	1.15005	9.28e-05	0.0107506	Solyc06g076550.2	SL2.50ch06	47553910	47555495	-	1449	-	- && U3UA11.1 RecName: Full=UDP-glucose iridoid glucosyltransferase; AltName: Full=UDP-glucose glucosyltransferase 7; Short=CrUGT7; AltName: Full=UDP-glycosyltransferase 76A2 && PF00201:UDP-glucoronosyl and UDP-glucosyl transferase	UDPGT
Solyc09g011510.2.ITAG2.4	192.743	191.432	122.94	43.4845	66.1027	91.6496	169.038	67.0789	1.33445	9.38e-05	0.0108021	Solyc09g011510.2	SL2.50ch09	4820455	4821500	-	839	-	- && Q03664.1 RecName: Full=Probable glutathione S-transferase; AltName: Full=Auxin-induced protein PCNT103 && PF00043:Glutathione S-transferase, C-terminal domain	GST_C
Solyc11g073150.1.ITAG2.4	2.93517	1.05764	1.96704	26.8309	10.4925	22.4249	1.98662	19.9161	-3.31812	9.44e-05	0.0108198	Solyc11g073150.1	SL2.50ch11	56223962	56225034	+	990	-	- && - && PF06830:Root cap	-
Solyc03g115750.1.ITAG2.4	45.0059	32.7868	48.1925	9.25202	16.788	12.6749	41.9951	12.905	1.71222	9.58e-05	0.0108811	Solyc03g115750.1	SL2.50ch03	65369827	65371554	+	1728	-	- && O81072.1 RecName: Full=Probable xyloglucan galactosyltransferase GT11; AltName: Full=Glycosyltransferase 11; Short=AtGT11 && PF03016:Exostosin family	-
Solyc04g074450.1.ITAG2.4	2344.22	1608.67	1405.45	606.007	634.796	1115.39	1786.11	785.399	1.18534	9.88e-05	0.0111487	Solyc04g074450.1	SL2.50ch04	60438042	60438986	-	945	-	- && Q9ZPE7.1 RecName: Full=Protein EXORDIUM; Flags: Precursor && PF04674:Phosphate-induced protein 1 conserved region	-
Solyc06g008570.1.ITAG2.4	17.611	26.4409	36.3902	6.47641	1.04925	0	26.8141	2.50855	3.3862	0.000100517	0.0112902	Solyc06g008570.1	SL2.50ch06	2465155	2467185	+	2031	-	- && - && -	-
Solyc05g010060.2.ITAG2.4	6.84873	13.7493	18.6869	41.6341	41.97	49.7248	13.095	44.4429	-1.76431	0.000101487	0.0113422	Solyc05g010060.2	SL2.50ch05	4268423	4273628	+	2556	-	- && Q93ZF5.1 RecName: Full=Phosphate transporter PHO1 homolog 1; AltName: Full=Protein PHO1 homolog 1; Short=AtPHO1;H1 && PF03105:SPX domain|PF03124:EXS family	SPX
Solyc01g088160.2.ITAG2.4	10.7623	4.23055	3.93408	27.7561	50.364	23.3999	6.30897	33.84	-2.41411	0.000102301	0.0113762	Solyc01g088160.2	SL2.50ch01	83010891	83013178	-	1910	-	- && Q9LY71.2 RecName: Full=Cytokinin dehydrogenase 6; AltName: Full=Cytokinin oxidase 6; Short=AtCKX6; Short=AtCKX7; Short=CKO6; Flags: Precursor && PF09265:Cytokinin dehydrogenase 1, FAD and cytokinin binding|PF01565:FAD binding domain	FAD_binding_4
Solyc02g080890.2.ITAG2.4	656.5	619.776	358.001	216.497	222.441	312.974	544.759	250.637	1.11983	0.000103179	0.0114171	Solyc02g080890.2	SL2.50ch02	44991244	44993799	-	1999	-	- && Q9C519.1 RecName: Full=WRKY transcription factor 6; AltName: Full=WRKY DNA-binding protein 6; Short=AtWRKY6 && PF03106:WRKY DNA -binding domain	WRKY
Solyc01g105210.2.ITAG2.4	139.91	119.513	186.869	64.7641	66.1027	82.8746	148.764	71.2471	1.06295	0.000103836	0.0114332	Solyc01g105210.2	SL2.50ch01	93459226	93460916	+	743	-	- && P0C7Q8.1 RecName: Full=Protein DA1; AltName: Full=Protein SUPPRESSOR OF LARGE SEED AND ORGAN PHENOTYPES OF DA1-1 1 && PF12315:Protein of unknown function (DUF3633)	-
Solyc02g077060.1.ITAG2.4	35.222	30.6715	11.8022	0.925202	2.0985	5.84997	25.8986	2.95789	3.13339	0.000110883	0.0120314	Solyc02g077060.1	SL2.50ch02	42122347	42122826	+	480	-	- && - && PF05659:Arabidopsis broad-spectrum mildew resistance protein RPW8	-
Solyc07g055710.2.ITAG2.4	134.039	113.167	94.4179	54.5869	41.97	62.3997	113.875	52.9855	1.1015	0.000111807	0.012073	Solyc07g055710.2	SL2.50ch07	63648888	63650452	-	1477	-	- && Q9FK72.1 RecName: Full=Heat stress transcription factor A-4c; Short=AtHsfA4c; AltName: Full=AtHsf-20; AltName: Full=Protein ROOT HANDEDNESS 1 && PF00447:HSF-type DNA-binding	HSF_DNA-bind
Solyc08g082680.2.ITAG2.4	47.9411	119.513	118.022	225.749	239.229	248.624	95.1589	237.867	-1.3229	0.000120699	0.0127257	Solyc08g082680.2	SL2.50ch08	65386444	65388475	-	1146	-	- && Q84TF5.1 RecName: Full=Probable E3 ubiquitin-protein ligase RHA4A; AltName: Full=RING-H2 finger A4a; AltName: Full=RING-H2 zinc finger protein RHA4a && PF13639:Ring finger domain	-
Solyc07g052370.2.ITAG2.4	15.6542	13.7493	19.6704	0	0	1.94999	16.358	0.649997	4.64701	0.00012315	0.0128628	Solyc07g052370.2	SL2.50ch07	60883858	60885735	+	1562	-	- && A6YIH8.1 RecName: Full=Premnaspirodiene oxygenase; Short=HPO; AltName: Full=Cytochrome P450 71D55 && PF00067:Cytochrome P450	p450
Solyc09g011160.2.ITAG2.4	64.5738	52.8819	46.2254	172.088	122.762	91.6496	54.5604	128.833	-1.2403	0.00013374	0.0138203	Solyc09g011160.2	SL2.50ch09	4509244	4514595	+	1625	-	- && Q9FN03.1 RecName: Full=Ultraviolet-B receptor UVR8; AltName: Full=Protein UV-B RESISTANCE 8; AltName: Full=RCC1 domain-containing protein UVR8 && PF00415:Regulator of chromosome condensation (RCC1) repeat	-
Solyc01g005160.2.ITAG2.4	51.8547	64.5159	35.4067	14.8032	16.788	19.4999	50.5924	17.0304	1.57008	0.000136327	0.0139779	Solyc01g005160.2	SL2.50ch01	137781	139489	+	1709	-	- && Q5PNY6.1 RecName: Full=U-box domain-containing protein 21; AltName: Full=Plant U-box protein 21 && PF04564:U-box domain	U-box
Solyc04g080820.2.ITAG2.4	66.5305	88.8416	48.1925	121.201	154.24	230.099	67.8549	168.513	-1.31386	0.000149161	0.0150182	Solyc04g080820.2	SL2.50ch04	64891808	64897323	-	2072	-	- && Q67YU0.1 RecName: Full=Cytokinin dehydrogenase 5; AltName: Full=Cytokinin oxidase 5; Short=AtCKX5; Short=AtCKX6; Short=CKO5; Flags: Precursor && PF09265:Cytokinin dehydrogenase 1, FAD and cytokinin binding|PF01565:FAD binding domain	FAD_binding_4
Solyc01g098590.2.ITAG2.4	11.7407	27.4986	20.6539	0	3.14775	2.92499	19.9644	2.02424	3.32855	0.000154211	0.015457	Solyc01g098590.2	SL2.50ch01	89070927	89072248	+	1144	-	- && Q9MAA2.1 RecName: Full=Phosphoglycerate mutase-like protein AT74; Short=At-74 && PF00300:Histidine phosphatase superfamily (branch 1)	-
Solyc00g206460.1.ITAG2.4	607.58	411.421	221.292	90.6698	117.516	206.699	413.431	138.295	1.58009	0.000165184	0.0163371	Solyc00g206460.1	SL2.50ch00	19006504	19007274	-	771	-	- && Q9ZPE7.1 RecName: Full=Protein EXORDIUM; Flags: Precursor && PF04674:Phosphate-induced protein 1 conserved region	-
Solyc02g068680.1.ITAG2.4	56.7466	65.5735	25.5715	9.25202	7.34474	18.5249	49.2972	11.7072	2.07018	0.000171884	0.0169249	Solyc02g068680.1	SL2.50ch02	38624575	38625960	+	1386	-	- && - && -	-
Solyc02g068460.1.ITAG2.4	72.4009	66.6312	29.5056	9.25202	15.7387	20.4749	56.1792	15.1552	1.89305	0.000172834	0.0169438	Solyc02g068460.1	SL2.50ch02	38401854	38402432	-	579	-	- && Q9LIE6.1 RecName: Full=VQ motif-containing protein 22; Short=AtVQ22 && PF05678:VQ motif	-
Solyc07g053900.2.ITAG2.4	8.80551	4.23055	9.8352	21.2796	27.2805	95.5495	7.62375	48.0366	-2.65063	0.00017659	0.0172364	Solyc07g053900.2	SL2.50ch07	62304722	62306075	-	1256	-	- && - && PF04720:PDDEXK-like family of unknown function	-
Solyc01g086660.2.ITAG2.4	179.045	222.104	77.6981	35.1577	71.3489	46.7998	159.616	51.1021	1.64541	0.000183314	0.0177379	Solyc01g086660.2	SL2.50ch01	81629718	81630184	-	467	-	- && - && -	-
Solyc03g098060.1.ITAG2.4	17.611	30.6715	28.5221	5.55121	7.34474	1.94999	25.6015	4.94865	2.37717	0.000195607	0.0187123	Solyc03g098060.1	SL2.50ch03	60406311	60406850	-	540	-	- && Q9M9S0.1 RecName: Full=Zinc-finger homeodomain protein 4; Short=AtZHD4; AltName: Full=Homeobox protein 31; Short=AtHB-31; AltName: Full=Protein FLORAL TRANSITION AT THE MERISTEM 2 && PF04770:ZF-HD protein dimerisation region	ZF-HD_dimer
Solyc12g056650.1.ITAG2.4	926.535	1039.66	1650.35	2383.32	1949.5	2998.11	1205.51	2443.65	-1.01937	0.000196219	0.0187123	Solyc12g056650.1	SL2.50ch12	62628190	62640707	-	3504	-	- && Q9SQI2.2 RecName: Full=Protein GIGANTEA && -	-
Solyc08g013760.1.ITAG2.4	25.4381	52.8819	49.176	88.8194	102.826	112.124	42.4987	101.257	-1.25463	0.000196734	0.0187123	Solyc08g013760.1	SL2.50ch08	3236497	3237129	+	633	-	- && Q1PE04.1 RecName: Full=F-box/LRR-repeat protein 25 && -	-
Solyc03g082520.1.ITAG2.4	47.9411	33.8444	30.4891	1.8504	10.4925	11.6999	37.4249	8.01428	2.23599	0.000202527	0.0191008	Solyc03g082520.1	SL2.50ch03	52456478	52456831	-	354	-	- && Q9ZUZ3.1 RecName: Full=Auxin-responsive protein SAUR32; AltName: Full=Protein ABOLISHED APICAL HOOK MAINTENANCE 1; AltName: Full=Protein SMALL AUXIN UP RNA 32 && PF02519:Auxin responsive protein	Auxin_inducible
Solyc05g014590.2.ITAG2.4	0	2.11528	0	13.878	9.44324	31.1999	0.705092	18.1737	-4.7467	0.000205123	0.0192643	Solyc05g014590.2	SL2.50ch05	8469227	8471705	+	873	-	- && Q2HIV9.1 RecName: Full=Transcription factor bHLH35; AltName: Full=Basic helix-loop-helix protein 35; Short=AtbHLH35; Short=bHLH 35; AltName: Full=Transcription factor EN 41; AltName: Full=bHLH transcription factor bHLH035 && PF00010:Helix-loop-helix DNA-binding domain	HLH
Solyc08g006520.1.ITAG2.4	25.4381	47.5937	57.0442	87.8942	121.713	112.124	43.3587	107.244	-1.30654	0.000206826	0.019343	Solyc08g006520.1	SL2.50ch08	1130492	1131028	-	537	-	- && O81775.1 RecName: Full=Protein GLUTAMINE DUMPER 1 && -	-
Solyc12g096490.1.ITAG2.4	66.5305	92.0145	73.764	163.761	187.816	118.949	77.4363	156.842	-1.01905	0.000221712	0.0206488	Solyc12g096490.1	SL2.50ch12	65386364	65386858	-	495	-	- && Q3E965.2 RecName: Full=Protein GLUTAMINE DUMPER 5 && -	-
Solyc06g060590.2.ITAG2.4	37.1788	49.709	57.0442	82.343	118.565	109.199	47.9773	103.369	-1.10627	0.000227554	0.0211049	Solyc06g060590.2	SL2.50ch06	38581075	38585315	-	1037	-	- && Q8L9J7.1 RecName: Full=Bidirectional sugar transporter SWEET1; Short=AtSWEET1; AltName: Full=Protein SUGARS WILL EVENTUALLY BE EXPORTED TRANSPORTERS 1 && PF03083:Sugar efflux transporter for intercellular exchange	-
Solyc08g066880.2.ITAG2.4	131.104	203.066	151.462	98.9966	64.0042	66.2997	161.878	76.4335	1.07908	0.000251112	0.0228165	Solyc08g066880.2	SL2.50ch08	55764753	55765662	-	704	-	- && B7GIU7.1 RecName: Full=5'-methylthioadenosine/S-adenosylhomocysteine nucleosidase; Short=MTA/SAH nucleosidase; Short=MTAN; AltName: Full=5'-methylthioadenosine nucleosidase; Short=MTA nucleosidase; AltName: Full=S-adenosylhomocysteine nucleosidase; Short=AdoHcy nucleosidase; Short=SAH nucleosidase; Short=SRH nucleosidase && PF01048:Phosphorylase superfamily	-
Solyc10g079600.1.ITAG2.4	123.277	268.64	123.924	370.081	408.158	401.698	171.947	393.312	-1.19515	0.000252737	0.0228712	Solyc10g079600.1	SL2.50ch10	61102863	61104474	-	684	-	- && O80366.1 RecName: Full=Two-component response regulator ARR9; AltName: Full=Response reactor 4 && PF00072:Response regulator receiver domain	Response_reg
Solyc12g036390.1.ITAG2.4	579.207	334.213	410.128	148.958	174.175	276.899	441.183	200.011	1.14172	0.000258177	0.0232693	Solyc12g036390.1	SL2.50ch12	52390662	52393456	+	1359	-	- && Q9C9T2.1 RecName: Full=Protein SAR DEFICIENT 1 && PF07887:Calmodulin binding protein-like	-
Solyc03g114940.2.ITAG2.4	16.6326	17.9798	9.8352	37.9333	39.8715	50.6998	14.8159	42.8348	-1.5348	0.000275392	0.0244177	Solyc03g114940.2	SL2.50ch03	64796373	64798714	-	1949	-	- && Q9LMX7.1 RecName: Full=Cytochrome P450 78A5; AltName: Full=Protein KLUH && PF00067:Cytochrome P450	p450
Solyc07g042430.1.ITAG2.4	9.7839	8.4611	39.3408	0.925202	0	1.94999	19.1953	0.958398	4.30296	0.000283959	0.0248904	Solyc07g042430.1	SL2.50ch07	55578395	55580875	+	1542	-	- && Q9LMA1.1 RecName: Full=Probable flavin-containing monooxygenase 1 && PF00743:Flavin-binding monooxygenase-like	FMO-like
Solyc02g092890.1.ITAG2.4	29.3517	12.6917	10.8187	0.925202	3.14775	0.974995	17.6207	1.68265	3.41785	0.000291546	0.0254556	Solyc02g092890.1	SL2.50ch02	53839192	53839464	+	273	-	- && - && -	-
Solyc12g049030.1.ITAG2.4	5.87034	15.8646	28.5221	0.925202	1.04925	0	16.7523	0.65815	4.67779	0.000301072	0.0261851	Solyc12g049030.1	SL2.50ch12	37419465	37420619	+	1155	-	- && Q8GZC3.1 RecName: Full=Delta(12)-fatty-acid desaturase FAD2 && PF00487:Fatty acid desaturase|PF11960:Domain of unknown function (DUF3474)	-
Solyc09g011520.2.ITAG2.4	148.715	133.262	66.8794	54.5869	29.379	44.8498	116.286	42.9386	1.43357	0.000312317	0.0268497	Solyc09g011520.2	SL2.50ch09	4826832	4827949	-	1021	-	- && Q03662.1 RecName: Full=Probable glutathione S-transferase; AltName: Full=Auxin-induced protein PGNT1/PCNT110 && PF13417:Glutathione S-transferase, N-terminal domain|PF00043:Glutathione S-transferase, C-terminal domain	GST_C
Solyc01g079880.2.ITAG2.4	1027.31	1776.83	2542.4	911.324	708.243	811.196	1782.18	810.254	1.13706	0.000321316	0.0275174	Solyc01g079880.2	SL2.50ch01	79026109	79030253	-	1132	-	- && P24805.1 RecName: Full=Stem-specific protein TSJT1 && PF12481:Aluminium induced protein	-
Solyc00g034810.1.ITAG2.4	21.5246	38.075	31.4726	58.2877	71.3489	97.4995	30.3574	75.7121	-1.32093	0.000324189	0.0276575	Solyc00g034810.1	SL2.50ch00	12856697	12858684	-	690	-	- && Q3HRP0.1 RecName: Full=Calcineurin B-like protein 7 && -	-
Solyc01g105960.2.ITAG2.4	0.97839	2.11528	0.98352	9.25202	12.591	24.3749	1.35906	15.406	-3.51654	0.000395247	0.03248	Solyc01g105960.2	SL2.50ch01	93968173	93969911	+	1159	-	- && Q6PWU2.1 RecName: Full=(-)-alpha-terpineol synthase && PF01397:Terpene synthase, N-terminal domain|PF03936:Terpene synthase family, metal binding domain	-
Solyc01g006320.2.ITAG2.4	54.7898	41.2479	119.989	19.4292	28.3297	15.5999	72.0091	21.1196	1.77418	0.000401753	0.0328937	Solyc01g006320.2	SL2.50ch01	903793	904590	+	798	-	- && O48915.1 RecName: Full=Protein NDR1; AltName: Full=Non-race specific disease resistance protein 1; Short=AtNDR1; Flags: Precursor && -	-
Solyc01g010180.2.ITAG2.4	53.8115	56.0548	50.1595	28.6813	18.8865	19.4999	53.3419	22.3559	1.24882	0.000413666	0.0334479	Solyc01g010180.2	SL2.50ch01	4975293	4976465	+	1053	-	- && - && -	-
Solyc07g006700.1.ITAG2.4	34.2437	38.075	47.209	12.9528	15.7387	15.5999	39.8425	14.7638	1.43514	0.000414507	0.0334479	Solyc07g006700.1	SL2.50ch07	1559173	1559763	-	591	-	- && Q40374.1 RecName: Full=Pathogenesis-related protein PR-1; Flags: Precursor && PF00188:Cysteine-rich secretory protein family	SCP
Solyc01g103000.1.ITAG2.4	23.4814	17.9798	10.8187	1.8504	4.197	0.974995	17.4266	2.3408	2.91703	0.000438024	0.0349709	Solyc01g103000.1	SL2.50ch01	91655455	91661455	+	186	-	- && - && -	-
Solyc09g066160.1.ITAG2.4	28.3733	14.8069	31.4726	5.55121	7.34474	1.94999	24.8843	4.94865	2.33962	0.000438074	0.0349709	Solyc09g066160.1	SL2.50ch09	64590517	64590837	-	321	-	- && - && -	-
Solyc01g109810.2.ITAG2.4	4.89195	10.5764	22.621	55.5121	57.7087	34.1248	12.6964	49.1152	-1.95007	0.000469645	0.036963	Solyc01g109810.2	SL2.50ch01	96669036	96670087	+	1052	-	- && - && -	-
Solyc10g079660.1.ITAG2.4	9.7839	17.9798	14.7528	39.7837	33.576	45.8248	14.1722	39.7281	-1.49301	0.000503629	0.0393605	Solyc10g079660.1	SL2.50ch10	61156822	61162264	+	2094	-	- && Q9M1K0.1 RecName: Full=Transcription factor ORG3; AltName: Full=Basic helix-loop-helix protein 39; Short=AtbHLH39; Short=bHLH 39; AltName: Full=OBP3-responsive gene 3; AltName: Full=Transcription factor EN 9; AltName: Full=bHLH transcription factor bHLH039 && PF00010:Helix-loop-helix DNA-binding domain	HLH
Solyc09g014560.1.ITAG2.4	19.5678	16.9222	17.7034	5.55121	2.0985	1.94999	18.0645	3.1999	2.47883	0.000528002	0.040837	Solyc09g014560.1	SL2.50ch09	6195377	6197648	-	225	-	- && - && -	-
Solyc11g005280.1.ITAG2.4	13.6975	58.1701	82.6157	167.462	176.274	175.499	51.4944	173.078	-1.74954	0.000531722	0.0409031	Solyc11g005280.1	SL2.50ch11	227135	227761	+	627	-	- && Q6NQG7.1 RecName: Full=RING-H2 finger protein ATL78; AltName: Full=RING-type E3 ubiquitin transferase ATL78 && PF13639:Ring finger domain	-
Solyc11g045460.1.ITAG2.4	9.7839	6.34583	4.9176	18.504	25.182	48.7498	7.01578	30.8119	-2.13245	0.000534346	0.0409031	Solyc11g045460.1	SL2.50ch11	30442661	30443404	+	744	-	- && Q9FG13.1 RecName: Full=Probable carboxylesterase 15; AltName: Full=AtCXE15 && PF07859:alpha/beta hydrolase fold	Abhydrolase_3
Solyc12g087870.1.ITAG2.4	3.91356	10.5764	21.6374	40.7089	45.1177	50.6998	12.0425	45.5088	-1.9169	0.000544366	0.0414644	Solyc12g087870.1	SL2.50ch12	63371457	63373124	+	1071	-	- && Q9FZ96.1 RecName: Full=Purine permease 1; Short=AtPUP1 && PF16913:Purine nucleobase transmembrane transport	-
Solyc01g106510.2.ITAG2.4	94.9038	245.372	97.3685	35.1577	66.1027	47.7748	145.881	49.6784	1.55536	0.000545389	0.0414644	Solyc01g106510.2	SL2.50ch01	94373698	94375161	-	1464	-	- && - && PF03478:Protein of unknown function (DUF295)	DUF295
Solyc07g006300.2.ITAG2.4	40.114	65.5735	56.0606	98.9966	97.5802	133.574	53.9161	110.05	-1.03183	0.000574161	0.0432109	Solyc07g006300.2	SL2.50ch07	1096789	1105446	+	2323	-	- && Q8H1Z0.1 RecName: Full=Protein ECERIFERUM 3; AltName: Full=Protein FACELESS POLLEN 1; AltName: Full=Protein WAX2; AltName: Full=Protein YORE-YORE && PF04116:Fatty acid hydroxylase superfamily|PF12076:WAX2 C-terminal domain	-
Solyc02g076980.2.ITAG2.4	59.6818	76.1499	32.4562	12.0276	26.2312	7.79996	56.096	15.3529	1.87656	0.000577297	0.0433012	Solyc02g076980.2	SL2.50ch02	42066264	42067642	+	1305	-	- && Q9FJ47.1 RecName: Full=Senescence-specific cysteine protease SAG12; AltName: Full=Cysteine proteinase SAG12; AltName: Full=Protein SENESCENCE-ASSOCIATED GENE 12; Flags: Precursor && PF00112:Papain family cysteine protease|PF08246:Cathepsin propeptide inhibitor domain (I29)	Peptidase_C1
Solyc10g051020.1.ITAG2.4	9.7839	12.6917	13.7693	0	1.04925	0.974995	12.0816	0.674748	4.19963	0.000650891	0.0477007	Solyc10g051020.1	SL2.50ch10	51374325	51379554	-	1551	-	- && H2DH21.1 RecName: Full=Cytochrome P450 CYP72A219; AltName: Full=Cytochrome P450 CYP72A129 [Panax ginseng] && PF00067:Cytochrome P450	p450
Solyc07g008980.2.ITAG2.4	1349.2	1074.56	2428.31	2467.51	4049.05	4327.03	1617.36	3614.53	-1.16005	0.000657016	0.0479922	Solyc07g008980.2	SL2.50ch07	4005578	4006883	+	454	-	- && - && -	-
Solyc12g005670.1.ITAG2.4	1099.71	1214.17	3131.53	429.294	510.984	971.095	1815.14	637.124	1.51048	0.000665213	0.0482755	Solyc12g005670.1	SL2.50ch12	358968	363938	+	2361	-	- && Q9M7K4.1 RecName: Full=Potassium transporter 5; Short=AtHAK1; Short=AtHAK5; Short=AtPOT5 && PF02705:K+ potassium transporter	K_trans
