# Supplementary material for: The Tomato Transcription Factor SlNAC063 Is Required for Aluminum Tolerance by Regulating SlAAE3-1 Expression
Source: Front Plant Sci. 2022 Mar 15;13:826954. doi: 10.3389/fpls.2022.826954 (PMC8965521; doi:10.3389/fpls.2022.826954)
Supplement: Supplementary file 9 [file Table_5.xlsx]

## Sheet: Sheet1
Table S5. Identification of DEGs in root apex of nac063 mutants comapred to that of WT plants in the absence of Al
gene_id	NAC063-Al_1	NAC063-Al_2	NAC063-Al_3	AC-Al_1	AC-Al_2	AC-Al_3	NAC063-Al	AC-Al	log2FoldChange	pvalue	padj	gene_name	gene_chr	gene_start	gene_end	gene_strand	gene_length	gene_biotype	gene_description	tf_family
Solyc10g086690.1.ITAG2.4	2116.81	1999.65	1738.13	107.71	83.7525	94.5843	1951.53	95.3489	4.35206	2.51e-136	5.64e-132	Solyc10g086690.1	SL2.50ch10	65458451	65461308	+	882	-	- && Q9M325.1 RecName: Full=Phosphatidylinositol:ceramide inositolphosphotransferase 1; AltName: Full=Inositol-phosphorylceramide synthase 1; Short=AtIPCS1; Short=IPC synthase 1; AltName: Full=Protein ERH1-like2; AltName: Full=Sphingolipid synthase 1 && PF14360:PAP2 superfamily C-terminal	-
Solyc04g055170.2.ITAG2.4	300.181	403.656	288.757	4299.81	3982.05	4308.62	330.865	4196.83	-3.66631	3.71e-107	4.17e-103	Solyc04g055170.2	SL2.50ch04	53785541	53789376	-	1277	-	- && Q9XEE2.1 RecName: Full=Annexin D2; AltName: Full=AnnAt2 && PF00191:Annexin	-
Solyc12g013700.1.ITAG2.4	6183.35	5401.75	9574.64	127.727	127.26	193.193	7053.24	149.393	5.56088	2.51e-99	1.88e-95	Solyc12g013700.1	SL2.50ch12	4542236	4544315	+	765	-	- && P24805.1 RecName: Full=Stem-specific protein TSJT1 && PF12481:Aluminium induced protein	-
Solyc04g012050.2.ITAG2.4	1128.84	1373.47	1158.76	4.76592	18.4908	23.143	1220.35	15.4666	6.31788	2.7e-87	1.23e-83	Solyc04g012050.2	SL2.50ch04	4376146	4378819	-	1353	-	- && Q9FGF8.1 RecName: Full=Ethylene-responsive transcription factor ABR1; AltName: Full=Protein ABA REPRESSOR 1 && PF00847:AP2 domain	AP2
Solyc01g008210.2.ITAG2.4	2183.84	1906.5	1494.09	21.9232	46.7709	50.3108	1861.48	39.6683	5.55905	2.73e-87	1.23e-83	Solyc01g008210.2	SL2.50ch01	2350183	2350964	-	782	-	- && - && -	-
Solyc07g062700.2.ITAG2.4	41766	39094.6	28350.4	3393.34	3343.58	3658.6	36403.7	3465.17	3.39307	2.3e-84	8.61e-81	Solyc07g062700.2	SL2.50ch07	65379890	65385114	-	2076	-	- && - && PF01699:Sodium/calcium exchanger protein	Na_Ca_ex
Solyc06g068960.1.ITAG2.4	2769.63	4162.83	3019.84	171.573	168.593	232.436	3317.44	190.867	4.11906	5.78e-80	1.86e-76	Solyc06g068960.1	SL2.50ch06	42782090	42782554	+	465	-	- && Q9M7R0.1 RecName: Full=Calcium-binding allergen Ole e 8; AltName: Full=PCA18/PCA23; AltName: Allergen=Ole e 8 && PF13499:EF-hand domain pair	-
Solyc10g081570.1.ITAG2.4	25422.2	16279.8	16117.3	447.997	340.449	732.525	19273.1	506.99	5.24817	3.74e-72	1.05e-68	Solyc10g081570.1	SL2.50ch10	62608954	62610237	-	1206	-	- && - && -	-
Solyc12g005910.1.ITAG2.4	3818.81	4294.28	3918.72	700.59	655.88	816.041	4010.6	724.171	2.4691	2.92e-69	7.29e-66	Solyc12g005910.1	SL2.50ch12	541920	546745	+	660	-	- && - && PF05529:B-cell receptor-associated protein 31-like	-
Solyc02g089610.1.ITAG2.4	4528.95	2486.11	2367.81	46.706	40.2447	84.5221	3127.62	57.1576	5.77264	2.42e-68	5.44e-65	Solyc02g089610.1	SL2.50ch02	51368627	51369715	-	1089	-	- && Q96471.1 RecName: Full=S-adenosylmethionine decarboxylase proenzyme; Short=AdoMetDC; Short=SAMDC; Contains: RecName: Full=S-adenosylmethionine decarboxylase alpha chain; Contains: RecName: Full=S-adenosylmethionine decarboxylase beta chain; Flags: Precursor && PF01536:Adenosylmethionine decarboxylase	SAM_decarbox
Solyc01g111440.2.ITAG2.4	7164.52	5322.05	4935.89	604.319	701.564	681.208	5807.49	662.363	3.1325	1.09e-66	2.22e-63	Solyc01g111440.2	SL2.50ch01	97680282	97693637	+	12053	-	- && F4JNX2.1 RecName: Full=Senescence/dehydration-associated protein At4g35985, chloroplastic; Flags: Precursor && -	-
Solyc03g097270.2.ITAG2.4	5344.01	5443.15	5261.91	1676.65	1696.8	1639.13	5349.69	1670.86	1.67888	1.02e-62	1.91e-59	Solyc03g097270.2	SL2.50ch03	59587548	59593766	+	1059	-	- && Q8H0X6.2 RecName: Full=Cysteine proteinase inhibitor 6; Short=AtCYS-6; AltName: Full=PIP-M; AltName: Full=PRLI-interacting factor M; Flags: Precursor && PF16845:Aspartic acid proteinase inhibitor	-
Solyc01g095140.2.ITAG2.4	2745.35	2232.53	3907.54	203.028	234.942	191.181	2961.81	209.717	3.82074	7.54e-62	1.3e-58	Solyc01g095140.2	SL2.50ch01	86522427	86523239	+	721	-	- && P46519.1 RecName: Full=Desiccation protectant protein Lea14 homolog && PF03168:Late embryogenesis abundant protein	-
Solyc02g070890.2.ITAG2.4	1645.65	1592.89	1487.57	309.785	242.556	288.784	1575.37	280.375	2.48862	2.69e-61	4.32e-58	Solyc02g070890.2	SL2.50ch02	40488873	40492980	+	3658	-	- && Q9FL28.1 RecName: Full=LRR receptor-like serine/threonine-protein kinase FLS2; AltName: Full=Protein FLAGELLIN-SENSING 2; AltName: Full=Protein FLAGELLIN-SENSITIVE 2; Flags: Precursor && PF08263:Leucine rich repeat N-terminal domain|PF13855:Leucine rich repeat|PF00069:Protein kinase domain	Pkinase
Solyc03g006490.2.ITAG2.4	9382.37	7372.42	11243.8	347.912	410.061	677.183	9332.88	478.386	4.28615	1.45e-58	2.18e-55	Solyc03g006490.2	SL2.50ch03	1074627	1077380	+	1071	-	- && - && PF12481:Aluminium induced protein	-
Solyc01g008220.2.ITAG2.4	1697.14	1637.39	788.96	40.0337	33.7186	56.3481	1374.5	43.3668	4.98431	4.1e-52	5.76e-49	Solyc01g008220.2	SL2.50ch01	2351732	2354922	-	663	-	- && - && -	-
Solyc01g007110.2.ITAG2.4	1864.23	1763.67	1896.48	525.205	538.409	500.089	1841.46	521.234	1.82114	4.4e-52	5.82e-49	Solyc01g007110.2	SL2.50ch01	1660222	1663543	+	1102	-	- && - && PF04970:Lecithin retinol acyltransferase	-
Solyc03g116590.2.ITAG2.4	3618.69	3053.3	3448.32	915.057	931.067	890.501	3373.44	912.208	1.88694	1.39e-50	1.74e-47	Solyc03g116590.2	SL2.50ch03	65938883	65940835	-	919	-	- && - && PF06232:Embryo-specific protein 3, (ATS3)	-
Solyc04g079940.2.ITAG2.4	1597.08	2428.15	1992.43	166.807	152.277	237.467	2005.88	185.517	3.43395	6.8e-50	8.05e-47	Solyc04g079940.2	SL2.50ch04	64259654	64264307	-	1494	-	- && - && -	-
Solyc01g108030.2.ITAG2.4	2477.22	2771.77	2516.85	775.892	751.598	775.792	2588.61	767.761	1.75321	1.71e-49	1.92e-46	Solyc01g108030.2	SL2.50ch01	95402087	95406714	-	2117	-	- && Q9LDD8.1 RecName: Full=Methylcrotonoyl-CoA carboxylase beta chain, mitochondrial; Short=MCCase subunit beta; AltName: Full=3-methylcrotonyl-CoA carboxylase 2; AltName: Full=3-methylcrotonyl-CoA:carbon dioxide ligase subunit beta; Flags: Precursor && PF01039:Carboxyl transferase domain	Carboxyl_trans
Solyc10g012080.2.ITAG2.4	833.513	711.056	841.122	142.978	155.54	157.976	795.23	152.165	2.38681	9.13e-49	9.77e-46	Solyc10g012080.2	SL2.50ch10	4409840	4412640	-	1125	-	- && - && -	-
Solyc12g088940.1.ITAG2.4	764.54	830.083	650.17	124.867	96.8049	97.6029	748.264	106.425	2.81097	1.6e-47	1.63e-44	Solyc12g088940.1	SL2.50ch12	64125377	64130154	-	2043	-	- && Q9CAD5.1 RecName: Full=Mitogen-activated protein kinase kinase kinase YODA; AltName: Full=YODA MAPKK kinase && PF00069:Protein kinase domain	Pkinase
Solyc03g083620.1.ITAG2.4	6836.17	6804.19	6349.87	707.263	604.759	1055.52	6663.41	789.181	3.07758	2.75e-47	2.69e-44	Solyc03g083620.1	SL2.50ch03	53579935	53580300	-	366	-	- && P17407.1 RecName: Full=21 kDa protein; AltName: Full=1.2 protein; Flags: Precursor && PF04043:Plant invertase/pectin methylesterase inhibitor	-
Solyc04g078640.1.ITAG2.4	1030.72	1331.03	1086.1	130.586	134.874	187.156	1149.28	150.872	2.92902	4.12e-47	3.86e-44	Solyc04g078640.1	SL2.50ch04	63332264	63332710	+	447	-	- && Q9FH94.1 RecName: Full=Ethylene-responsive transcription factor ERF010 && PF00847:AP2 domain	AP2
Solyc04g074490.2.ITAG2.4	5306.12	5077.79	3914.06	853.1	801.631	977.035	4765.99	877.256	2.44151	5.45e-47	4.9e-44	Solyc04g074490.2	SL2.50ch04	60482173	60493129	+	3038	-	- && Q9M9E8.3 RecName: Full=F-box protein At1g78280 && PF13621:Cupin-like domain|PF12937:F-box-like	-
Solyc01g058260.2.ITAG2.4	3785.78	3165.08	2460.03	282.143	246.907	398.461	3136.96	309.17	3.34241	1.87e-46	1.62e-43	Solyc01g058260.2	SL2.50ch01	65869702	65874380	-	1904	-	- && Q56XM9.1 RecName: Full=Nuclear poly(A) polymerase 3; Short=PAP(III); Short=Poly(A) polymerase III; AltName: Full=Polynucleotide adenylyltransferase 3 && PF04928:Poly(A) polymerase central domain	-
Solyc04g005490.2.ITAG2.4	2384.94	2406.41	2157.3	673.901	714.616	721.457	2316.21	703.325	1.71962	2.49e-45	2.07e-42	Solyc04g005490.2	SL2.50ch04	326470	332708	+	1937	-	- && A7T167.1 RecName: Full=Protein GDAP2 homolog && PF01661:Macro domain|PF13716:Divergent CRAL/TRIO domain	A1pp
Solyc09g075210.2.ITAG2.4	16900.5	16745.5	24268.7	3329.47	3400.14	2951.23	19304.9	3226.95	2.58076	7.54e-45	6.05e-42	Solyc09g075210.2	SL2.50ch09	66984151	66985691	+	716	-	- && Q93WF6.1 RecName: Full=Protein SENESCENCE-ASSOCIATED GENE 21, mitochondrial; AltName: Full=Late embryogenensis abundant like 5; Short=AtLEA5; Flags: Precursor && -	-
Solyc03g031620.2.ITAG2.4	146.691	232.879	138.79	1416.43	1613.05	1341.29	172.786	1456.92	-3.07795	1.44e-43	1.12e-40	Solyc03g031620.2	SL2.50ch03	4095983	4098899	-	1721	-	- && P92980.2 RecName: Full=5'-adenylylsulfate reductase 3, chloroplastic; AltName: Full=3'-phosphoadenosine-5'-phosphosulfate reductase homolog 26; Short=PAPS reductase homolog 26; Short=Prh-26; AltName: Full=Adenosine 5'-phosphosulfate 5'-adenylylsulfate sulfotransferase 3; Short=APS sulfotransferase 3; AltName: Full=Thioredoxin-independent APS reductase 3; Flags: Precursor && PF00085:Thioredox…	-
Solyc10g081170.1.ITAG2.4	13889.9	18892.1	17886.2	2610.77	2887.83	3525.78	16889.4	3008.13	2.4892	4.6e-43	3.44e-40	Solyc10g081170.1	SL2.50ch10	62302432	62303815	-	450	-	- && P59220.2 RecName: Full=Calmodulin-7; Short=CaM-7 >P62199.2 RecName: Full=Calmodulin-1; Short=CaM-1 >P62200.2 RecName: Full=Calmodulin-1/11/16; Short=CaM-1/11/16 >P62201.2 RecName: Full=Calmodulin; Short=CaM >P62202.2 RecName: Full=Calmodulin; Short=CaM; AltName: Full=BC329 >Q7Y052.4 RecName: Full=Calmodulin; Short=CaM && PF13499:EF-hand domain pair	-
Solyc04g079470.2.ITAG2.4	7961.12	8836.96	7190.99	1418.34	1345.48	1873.57	7996.36	1545.8	2.37088	3.51e-42	2.54e-39	Solyc04g079470.2	SL2.50ch04	63948225	63950136	-	1555	-	- && Q9S7T8.1 RecName: Full=Serpin-ZX; AltName: Full=ArathZx; AltName: Full=AtSerpin1; AltName: Full=Serpin-1 && PF00079:Serpin (serine protease inhibitor)	Serpin
Solyc06g075520.2.ITAG2.4	253.551	274.279	273.854	26.6892	18.4908	18.1119	267.228	21.0973	3.6555	6.93e-42	4.87e-39	Solyc06g075520.2	SL2.50ch06	46898478	46900198	+	521	-	- && Q9FRL8.1 RecName: Full=Glutathione S-transferase DHAR2; AltName: Full=Chloride intracellular channel homolog 2; Short=CLIC homolog 2; AltName: Full=Glutathione-dependent dehydroascorbate reductase 2; Short=AtDHAR2; Short=CytDHAR; Short=GSH-dependent dehydroascorbate reductase 2 && PF13410:Glutathione S-transferase, C-terminal domain	-
Solyc03g118200.2.ITAG2.4	3538.06	3380.36	3031.95	923.636	733.107	869.37	3316.79	842.038	1.97723	2.74e-41	1.86e-38	Solyc03g118200.2	SL2.50ch03	67135156	67145536	-	2109	-	- && Q941L3.2 RecName: Full=Protein BONZAI 1; AltName: Full=COPINE 1 && PF00168:C2 domain|PF07002:Copine	C2
Solyc01g095150.2.ITAG2.4	12645.5	11955.5	15764.3	3253.22	3399.05	3490.56	13455.1	3380.94	1.99271	2.83e-41	1.87e-38	Solyc01g095150.2	SL2.50ch01	86524384	86526880	+	902	-	- && P46519.1 RecName: Full=Desiccation protectant protein Lea14 homolog && PF03168:Late embryogenesis abundant protein	-
Solyc07g024000.2.ITAG2.4	936.488	803.172	886.765	165.854	149.014	202.249	875.475	172.373	2.34369	1e-40	6.44e-38	Solyc07g024000.2	SL2.50ch07	23795954	23800624	+	1998	-	- && Q5N800.1 RecName: Full=Probable chlorophyll(ide) b reductase NYC1, chloroplastic; AltName: Full=Protein NON-YELLOW COLORING 1; Short=OsNYC1; Flags: Precursor && PF00106:short chain dehydrogenase	adh_short
Solyc01g109460.2.ITAG2.4	2187.73	3263.4	3080.39	487.077	368.729	461.853	2843.84	439.22	2.69412	2.53e-40	1.58e-37	Solyc01g109460.2	SL2.50ch01	96406722	96409894	+	1855	-	- && Q8VZ80.2 RecName: Full=Polyol transporter 5; AltName: Full=Protein POLYOL TRANSPORTER 5; Short=AtPLT5; AltName: Full=Sugar-proton symporter PLT5 && PF00083:Sugar (and other) transporter	Sugar_tr
Solyc01g079940.2.ITAG2.4	5490.7	5331.37	7626.92	1236.28	939.769	1031.37	6149.66	1069.14	2.52381	8.9e-39	5.41e-36	Solyc01g079940.2	SL2.50ch01	79094809	79097005	-	1584	-	- && P13917.2 RecName: Full=Basic 7S globulin; AltName: Full=SBg7S; Short=Bg; Contains: RecName: Full=Basic 7S globulin high kDa subunit; Contains: RecName: Full=Basic 7S globulin low kDa subunit; Flags: Precursor && PF14543:Xylanase inhibitor N-terminal|PF14541:Xylanase inhibitor C-terminal	-
Solyc04g080300.2.ITAG2.4	2364.54	2930.13	2410.66	514.72	509.041	658.065	2568.44	560.609	2.1956	5.98e-38	3.54e-35	Solyc04g080300.2	SL2.50ch04	64532601	64536307	-	1451	-	- && Q8GUH2.1 RecName: Full=Uncharacterized protein At1g01500 && -	-
Solyc02g089490.2.ITAG2.4	577.048	504.053	421.958	72.442	55.4725	77.4786	501.02	68.4644	2.8682	1.04e-37	6.01e-35	Solyc02g089490.2	SL2.50ch02	51304544	51306556	+	493	-	- && - && -	-
Solyc06g034370.1.ITAG2.4	509.045	376.746	462.012	48.6124	70.7002	58.3605	449.268	59.2244	2.92819	6.2e-37	3.48e-34	Solyc06g034370.1	SL2.50ch06	24179516	24180094	-	579	-	- && P17407.1 RecName: Full=21 kDa protein; AltName: Full=1.2 protein; Flags: Precursor && PF04043:Plant invertase/pectin methylesterase inhibitor	-
Solyc11g005630.1.ITAG2.4	338.068	436.777	353.961	32.4083	43.5078	52.3232	376.269	42.7464	3.14041	1.45e-36	7.96e-34	Solyc11g005630.1	SL2.50ch11	483096	485429	+	2334	-	- && Q25AG3.2 RecName: Full=G-type lectin S-receptor-like serine/threonine-protein kinase LECRK3; Short=OsLecRK3; AltName: Full=OsRLCK135; Flags: Precursor && PF00069:Protein kinase domain|PF01453:D-mannose binding lectin|PF00954:S-locus glycoprotein domain	Pkinase
Solyc02g087210.2.ITAG2.4	1900.18	1064	1988.7	123.914	137.05	188.162	1650.96	149.709	3.46338	1.96e-36	1.05e-33	Solyc02g087210.2	SL2.50ch02	49674963	49676205	+	1137	-	- && Q67YE6.2 RecName: Full=Zinc finger AN1 domain-containing stress-associated protein 12; Short=AtSAP12 && PF01428:AN1-like Zinc finger	zf-AN1
Solyc03g115650.2.ITAG2.4	6739.02	6109.7	7060.58	2124.65	2016.59	2353.54	6636.44	2164.92	1.61605	2.97e-36	1.55e-33	Solyc03g115650.2	SL2.50ch03	65287614	65290545	+	773	-	- && Q9AXQ6.1 RecName: Full=Eukaryotic translation initiation factor 5A-1; Short=eIF-5A-1 && PF01287:Eukaryotic elongation factor 5A hypusine, DNA-binding OB fold	-
Solyc08g075560.1.ITAG2.4	221.493	268.069	248.704	1.90637	13.0523	8.04973	246.089	7.66948	5.03812	4.87e-36	2.49e-33	Solyc08g075560.1	SL2.50ch08	59728392	59728557	-	102	-	- && - && -	-
Solyc09g097850.1.ITAG2.4	365.269	355.01	342.783	1088.54	1043.1	1148.09	354.354	1093.24	-1.62563	7.68e-36	3.84e-33	Solyc09g097850.1	SL2.50ch09	71842796	71843200	-	405	-	- && A2XS65.2 RecName: Full=Cysteine proteinase inhibitor 10; AltName: Full=Oryzacystatin X; Short=OC-X; AltName: Full=Oryzacystatin-10; Flags: Precursor >P0C579.1 RecName: Full=Cysteine proteinase inhibitor 10; AltName: Full=Oryzacystatin X; Short=OC-X; AltName: Full=Oryzacystatin-10; Flags: Precursor && PF16845:Aspartic acid proteinase inhibitor	-
Solyc05g013410.2.ITAG2.4	566.362	536.138	421.027	62.9102	56.5602	85.5283	507.842	68.3329	2.89196	1.58e-35	7.72e-33	Solyc05g013410.2	SL2.50ch05	6480260	6484488	+	1403	-	- && Q94C27.1 RecName: Full=F-box protein At1g70590 && PF12937:F-box-like|PF08238:Sel1 repeat	-
Solyc12g008560.1.ITAG2.4	6062.89	6472.99	8307.83	1086.63	1256.29	1566.68	6947.9	1303.2	2.41463	2.4e-35	1.15e-32	Solyc12g008560.1	SL2.50ch12	1952805	1953047	-	243	-	- && - && -	-
Solyc05g009620.2.ITAG2.4	499.331	685.18	821.561	71.4888	93.5418	84.5221	668.691	83.1842	3.00923	2.75e-35	1.29e-32	Solyc05g009620.2	SL2.50ch05	3820985	3821756	+	419	-	- && Q9SX26.2 RecName: Full=Protein PLANT CADMIUM RESISTANCE 12; Short=AtPCR12 && -	-
Solyc06g007180.2.ITAG2.4	755.796	555.803	1508.99	40.0337	47.8586	41.2548	940.197	43.0491	4.45059	3.32e-35	1.52e-32	Solyc06g007180.2	SL2.50ch06	1237837	1242525	-	2318	-	- && O24661.3 RecName: Full=Asparagine synthetase [glutamine-hydrolyzing]; AltName: Full=Glutamine-dependent asparagine synthetase && PF00733:Asparagine synthase|PF13537:Glutamine amidotransferase domain	-
Solyc07g006500.2.ITAG2.4	1586.4	1817.49	1605.86	217.326	196.873	339.095	1669.92	251.098	2.73286	5.37e-35	2.41e-32	Solyc07g006500.2	SL2.50ch07	1301353	1304574	+	3052	-	- && Q9ZV48.1 RecName: Full=Probable alpha,alpha-trehalose-phosphate synthase [UDP-forming] 11; AltName: Full=Trehalose-6-phosphate synthase 11; Short=AtTPS11 && PF00982:Glycosyltransferase family 20|PF02358:Trehalose-phosphatase	-
Solyc02g081560.1.ITAG2.4	264.237	262.894	271.991	22.8764	33.7186	37.23	266.374	31.275	3.09587	7.42e-35	3.27e-32	Solyc02g081560.1	SL2.50ch02	45467404	45467604	-	201	-	- && - && -	-
Solyc02g084130.2.ITAG2.4	673.222	461.617	344.646	36.221	16.3154	22.1367	493.162	24.8911	4.299	1.62e-34	7.02e-32	Solyc02g084130.2	SL2.50ch02	47318368	47325421	-	680	-	- && - && -	-
Solyc06g050700.2.ITAG2.4	4695.07	3690.87	7451.8	310.738	406.798	573.543	5279.25	430.36	3.61695	2.96e-34	1.25e-31	Solyc06g050700.2	SL2.50ch06	33472507	33473466	+	874	-	- && Q94AR4.1 RecName: Full=Polyadenylate-binding protein-interacting protein 2; Short=PABP-interacting protein 2; Short=Poly(A)-binding protein-interacting protein 2; AltName: Full=PAM2-containing protein CID2; AltName: Full=Protein CTC-INTERACTING DOMAIN 2 && -	-
Solyc02g089520.1.ITAG2.4	668.365	834.223	716.305	152.509	135.962	180.113	739.631	156.195	2.24215	5.17e-34	2.15e-31	Solyc02g089520.1	SL2.50ch02	51314208	51315980	-	1230	-	- && Q96502.1 RecName: Full=Zinc finger protein CONSTANS-LIKE 2 && PF06203:CCT motif|PF00643:B-box zinc finger	CCT
Solyc01g106610.2.ITAG2.4	6624.39	7308.25	6814.68	2774.72	2821.48	2893.88	6915.77	2830.03	1.28905	1.1e-33	4.51e-31	Solyc01g106610.2	SL2.50ch01	94422765	94423740	+	976	-	- && Q08697.1 RecName: Full=Pathogenesis-related protein 1A1; Short=PR-1A1; Flags: Precursor && PF00188:Cysteine-rich secretory protein family	SCP
Solyc12g008930.1.ITAG2.4	368.184	518.543	354.892	56.2379	39.157	48.2984	413.873	47.8978	3.10629	1.29e-33	5.18e-31	Solyc12g008930.1	SL2.50ch12	2245288	2245806	+	177	-	- && - && -	-
Solyc03g007960.2.ITAG2.4	730.538	493.702	449.903	39.0806	41.3324	67.4165	558.048	49.2765	3.50117	2.99e-33	1.18e-30	Solyc03g007960.2	SL2.50ch03	2447872	2450289	+	1297	-	- && O49815.1 RecName: Full=Beta-carotene hydroxylase 1, chloroplastic; Flags: Precursor && PF04116:Fatty acid hydroxylase superfamily	-
Solyc01g111820.2.ITAG2.4	322.525	445.057	402.397	15.2509	32.6309	40.2486	389.993	29.3768	3.73711	1.93e-32	7.46e-30	Solyc01g111820.2	SL2.50ch01	97982050	97982637	+	588	-	- && - && -	-
Solyc06g074420.1.ITAG2.4	1285.24	1994.48	1355.3	213.513	179.47	272.684	1545	221.889	2.79882	2.89e-32	1.1e-29	Solyc06g074420.1	SL2.50ch06	46053420	46054877	+	1458	-	- && Q9ZUX1.1 RecName: Full=Cytochrome P450 94C1 && PF00067:Cytochrome P450	p450
Solyc03g045140.2.ITAG2.4	323.496	318.785	361.413	44.7997	25.017	19.1181	334.565	29.6449	3.48836	3.94e-32	1.48e-29	Solyc03g045140.2	SL2.50ch03	11624234	11631716	-	2912	-	- && P31049.1 RecName: Full=Probable fatty acid methyltransferase; AltName: Full=ORF3; AltName: Full=S-adenosylmethionine-dependent methyltransferase; Short=AdoMet-MT; Short=SAM-MT && PF02353:Mycolic acid cyclopropane synthetase	-
Solyc04g025750.2.ITAG2.4	28.1724	30.0155	11.1777	509.954	380.693	885.47	23.1218	592.039	-4.68469	8.64e-32	3.18e-29	Solyc04g025750.2	SL2.50ch04	21195228	21197642	+	1294	-	- && F4I5D5.1 RecName: Full=WAT1-related protein At1g70260 && PF00892:EamA-like transporter family	DUF6
Solyc02g080880.2.ITAG2.4	2300.42	2388.82	2097.68	576.676	596.057	751.643	2262.31	641.459	1.81827	3.98e-31	1.44e-28	Solyc02g080880.2	SL2.50ch02	44975702	44981412	-	2050	-	- && O04057.1 RecName: Full=Aspartic proteinase; Flags: Precursor && PF05184:Saposin-like type B, region 1|PF03489:Saposin-like type B, region 2|PF00026:Eukaryotic aspartyl protease	Asp
Solyc03g118970.2.ITAG2.4	2544.26	1900.29	1635.67	384.133	402.447	289.79	2026.74	358.79	2.49815	1.57e-30	5.62e-28	Solyc03g118970.2	SL2.50ch03	67712885	67715799	-	1703	-	- && Q9FHB6.1 RecName: Full=Protein DETOXIFICATION 16; Short=AtDTX16; AltName: Full=Multidrug and toxic compound extrusion protein 16; Short=MATE protein 16 && PF01554:MatE	MatE
Solyc02g089530.2.ITAG2.4	284.638	375.711	338.126	29.5487	53.2971	34.2113	332.825	39.019	3.10044	1.71e-30	6.01e-28	Solyc02g089530.2	SL2.50ch02	51318497	51322552	+	161	-	- && - && -	-
Solyc02g078500.2.ITAG2.4	4097.62	3871.99	5905.56	247.828	291.502	589.642	4625.06	376.324	3.61945	3.1e-30	1.07e-27	Solyc02g078500.2	SL2.50ch02	43165563	43168058	+	1289	-	- && - && PF12481:Aluminium induced protein	-
Solyc06g009270.2.ITAG2.4	1565.99	1436.6	1472.66	582.396	561.251	587.63	1491.75	577.092	1.36999	4.35e-30	1.48e-27	Solyc06g009270.2	SL2.50ch06	3226578	3236590	-	1787	-	- && F4JQ95.1 RecName: Full=Diacylglycerol kinase 7; Short=AtDGK7; Short=DAG kinase 7; AltName: Full=Diglyceride kinase 7; Short=DGK 7 && PF00781:Diacylglycerol kinase catalytic domain|PF00609:Diacylglycerol kinase accessory domain	-
Solyc04g079240.2.ITAG2.4	282.695	351.905	418.233	54.3315	38.0693	48.2984	350.944	46.8997	2.89958	5.99e-30	2.01e-27	Solyc04g079240.2	SL2.50ch04	63757430	63760922	-	1350	-	- && O48723.1 RecName: Full=Patatin-like protein 2; Short=AtPLP2; AltName: Full=Patatin-related phospholipase A IIalpha; Short=pPLAIIa; AltName: Full=Phospholipase A IIA; Short=AtPLAIIA && PF01734:Patatin-like phospholipase	-
Solyc02g089010.1.ITAG2.4	289.495	290.839	257.087	34.3146	45.6832	23.143	279.141	34.3803	3.02676	1.15e-29	3.81e-27	Solyc02g089010.1	SL2.50ch02	50911846	50914957	+	573	-	- && A8R7E6.1 RecName: Full=Chitin elicitor receptor kinase 1; Short=AtCERK1; AltName: Full=LysM domain receptor-like kinase 1; Short=LysM RLK1; Short=LysM-containing receptor-like kinase 1; Flags: Precursor && -	-
Solyc01g081450.2.ITAG2.4	3639.09	3040.88	3904.75	872.164	1048.54	1084.7	3528.24	1001.8	1.81672	1.41e-29	4.6e-27	Solyc01g081450.2	SL2.50ch01	80658529	80661825	-	904	-	- && - && -	-
Solyc11g066060.1.ITAG2.4	5753.96	6239.07	6445.81	23602.7	27300.1	18587.8	6146.28	23163.5	-1.91405	2.6e-29	8.34e-27	Solyc11g066060.1	SL2.50ch11	51740558	51743431	+	2097	-	- && P24629.1 RecName: Full=Heat shock cognate 70 kDa protein 1 && PF00012:Hsp70 protein	HSP70
Solyc05g009340.1.ITAG2.4	490.588	581.679	436.862	62.9102	73.9633	102.634	503.043	79.8358	2.65589	3.52e-29	1.11e-26	Solyc05g009340.1	SL2.50ch05	3485275	3485631	-	357	-	- && - && -	-
Solyc03g082920.2.ITAG2.4	5875.39	5749.51	5699.7	13131.1	12884.8	11990.1	5774.87	12668.7	-1.13341	2.77e-28	8.66e-26	Solyc03g082920.2	SL2.50ch03	52794869	52798836	-	2417	-	- && Q03685.1 RecName: Full=Luminal-binding protein 5; Short=BiP 5; AltName: Full=78 kDa glucose-regulated protein homolog 5; Short=GRP-78-5; Flags: Precursor && PF00012:Hsp70 protein	HSP70
Solyc01g094550.2.ITAG2.4	1020.03	850.783	922.161	300.253	313.256	275.703	930.992	296.404	1.65174	5.57e-28	1.72e-25	Solyc01g094550.2	SL2.50ch01	85976329	85987604	+	1846	-	- && P58137.1 RecName: Full=Acyl-coenzyme A thioesterase 8; Short=Acyl-CoA thioesterase 8; AltName: Full=Choloyl-coenzyme A thioesterase; AltName: Full=Peroxisomal acyl-CoA thioesterase 2; Short=PTE-2; AltName: Full=Peroxisomal acyl-coenzyme A thioester hydrolase 1; Short=PTE-1; AltName: Full=Peroxisomal long-chain acyl-CoA thioesterase 1 && PF00027:Cyclic nucleotide-binding domain|PF13622:Thioes…	cNMP_binding
Solyc07g006650.2.ITAG2.4	5359.55	5559.07	6109.55	1487.92	1627.19	2019.47	5676.06	1711.53	1.72967	7.78e-28	2.36e-25	Solyc07g006650.2	SL2.50ch07	1517595	1522933	-	1765	-	- && Q9FKK7.2 RecName: Full=Xylose isomerase && -	-
Solyc06g050320.2.ITAG2.4	643.107	631.36	734.934	135.352	181.645	118.733	669.8	145.244	2.20791	1.01e-27	3.03e-25	Solyc06g050320.2	SL2.50ch06	32941534	32944391	-	627	-	- && - && -	-
Solyc06g054540.2.ITAG2.4	738.31	609.624	618.5	151.556	166.417	192.187	655.478	170.054	1.9471	1.05e-27	3.12e-25	Solyc06g054540.2	SL2.50ch06	37286620	37291193	-	1407	-	- && Q8VZK0.1 RecName: Full=E3 ubiquitin-protein ligase MIEL1; AltName: Full=MYB30-interacting E3 ligase 1 && PF14599:Zinc-ribbon|PF05495:CHY zinc finger	zf-CHY
Solyc02g094180.2.ITAG2.4	3948.99	4578.91	3577.8	541.409	472.06	890.501	4035.23	634.656	2.66834	1.58e-27	4.6e-25	Solyc02g094180.2	SL2.50ch02	54788317	54789985	+	1279	-	- && Q9SZE7.1 RecName: Full=Peroxidase 51; Short=Atperox P51; AltName: Full=ATP37; Flags: Precursor && PF00141:Peroxidase	-
Solyc09g091600.2.ITAG2.4	32.0582	34.1555	16.7666	239.249	234.942	304.883	27.6601	259.692	-3.23777	2.31e-27	6.66e-25	Solyc09g091600.2	SL2.50ch09	70846120	70848632	+	1118	-	- && Q8L730.1 RecName: Full=Protein SULFUR DEFICIENCY-INDUCED 2 && PF00515:Tetratricopeptide repeat	TPR_1
Solyc02g090600.1.ITAG2.4	139.89	85.9063	76.381	761.594	772.264	575.555	100.726	703.138	-2.80336	2.85e-27	8.1e-25	Solyc02g090600.1	SL2.50ch02	52150892	52151416	-	525	-	- && - && -	-
Solyc02g068030.1.ITAG2.4	266.18	269.104	223.554	40.9869	33.7186	49.3046	252.946	41.3367	2.60976	1.2e-26	3.37e-24	Solyc02g068030.1	SL2.50ch02	38083957	38084799	-	843	-	- && - && -	-
Solyc02g089540.2.ITAG2.4	406.071	299.12	516.969	60.0506	60.9109	49.3046	407.386	56.7554	2.84471	1.48e-26	4.11e-24	Solyc02g089540.2	SL2.50ch02	51322971	51325673	-	1611	-	- && Q96502.1 RecName: Full=Zinc finger protein CONSTANS-LIKE 2 && PF00643:B-box zinc finger|PF06203:CCT motif	CCT
Solyc03g046380.1.ITAG2.4	518.76	508.193	579.378	18.1105	28.2801	64.3978	535.444	36.9295	3.85902	1.87e-26	5.12e-24	Solyc03g046380.1	SL2.50ch03	12418617	12418859	+	243	-	- && - && -	-
Solyc09g083060.2.ITAG2.4	274.923	421.251	281.306	51.472	38.0693	39.2424	325.827	42.9279	2.91993	4.15e-26	1.12e-23	Solyc09g083060.2	SL2.50ch09	68734004	68738427	-	2011	-	- && - && PF04564:U-box domain	U-box
Solyc04g078110.1.ITAG2.4	534.303	638.605	367.001	2807.13	2258.06	2507.49	513.303	2524.22	-2.29876	4.55e-26	1.22e-23	Solyc04g078110.1	SL2.50ch04	62946877	62949177	+	2301	-	- && O65351.1 RecName: Full=Subtilisin-like protease SBT1.7; AltName: Full=Cucumisin-like serine protease; AltName: Full=Subtilase subfamily 1 member 7; Short=AtSBT1.7; AltName: Full=Subtilisin-like serine protease 1; Short=At-SLP1; Flags: Precursor && PF05922:Peptidase inhibitor I9|PF00082:Subtilase family|PF02225:PA domain	Peptidase_S8
Solyc03g096780.1.ITAG2.4	3.88584	12.4202	0.931476	173.48	204.487	167.032	5.74584	181.666	-5.01937	6.37e-26	1.68e-23	Solyc03g096780.1	SL2.50ch03	59121443	59121784	-	342	-	- && Q9FIR9.1 RecName: Full=Protein RESPONSE TO LOW SULFUR 2; AltName: Full=Protein ENHANCED DE-ETIOLATION 6 && -	-
Solyc07g053370.1.ITAG2.4	89.3744	64.171	135.995	631.008	648.266	623.854	96.5136	634.376	-2.71292	6.91e-26	1.81e-23	Solyc07g053370.1	SL2.50ch07	61825941	61826204	-	264	-	- && - && -	-
Solyc09g008010.2.ITAG2.4	783.969	1047.44	1025.55	255.453	231.679	279.728	952.32	255.62	1.89681	1.25e-25	3.22e-23	Solyc09g008010.2	SL2.50ch09	1486900	1491959	+	1546	-	- && Q9SRH7.1 RecName: Full=Receptor-like serine/threonine-protein kinase At3g01300 && PF07714:Protein tyrosine kinase	Pkinase_Tyr
Solyc08g080290.2.ITAG2.4	1510.62	1082.63	1413.05	210.654	232.767	340.101	1335.43	261.174	2.35444	7.88e-25	2.01e-22	Solyc08g080290.2	SL2.50ch08	63607586	63608903	-	1034	-	- && Q9FJ90.1 RecName: Full=Ethylene-responsive transcription factor ERF025 && PF00847:AP2 domain	AP2
Solyc03g031440.2.ITAG2.4	358.469	346.73	250.567	53.3783	59.8232	61.3792	318.589	58.1936	2.45328	1.07e-24	2.69e-22	Solyc03g031440.2	SL2.50ch03	3985961	3986976	+	938	-	- && Q6NQE2.1 RecName: Full=Probable NAD(P)H dehydrogenase (quinone) FQR1-like 1 && PF03358:NADPH-dependent FMN reductase	FMN_red
Solyc06g072390.2.ITAG2.4	84.5171	86.9413	57.7515	450.856	388.307	619.829	76.4033	486.331	-2.67267	1.09e-24	2.73e-22	Solyc06g072390.2	SL2.50ch06	44662939	44663667	-	648	-	- && Q9SIS4.1 RecName: Full=Type IV inositol polyphosphate 5-phosphatase 9; Short=At5PTase9 && -	-
Solyc08g078700.2.ITAG2.4	35.944	49.6808	49.3682	393.665	517.743	262.622	44.9977	391.343	-3.12032	1.17e-24	2.9e-22	Solyc08g078700.2	SL2.50ch08	62469844	62471072	+	994	-	- && P11890.1 RecName: Full=Small heat shock protein, chloroplastic; Flags: Precursor && PF00011:Hsp20/alpha crystallin family	-
Solyc03g031890.2.ITAG2.4	1696.17	1281.35	1918.84	152.509	238.205	316.958	1632.12	235.891	2.7914	1.2e-24	2.92e-22	Solyc03g031890.2	SL2.50ch03	4350215	4352634	-	942	-	- && - && -	-
Solyc05g052050.1.ITAG2.4	1315.36	2736.58	1757.69	127.727	151.19	271.678	1936.54	183.532	3.39935	1.44e-24	3.48e-22	Solyc05g052050.1	SL2.50ch05	62397179	62397883	+	705	-	- && Q40476.1 RecName: Full=Ethylene-responsive transcription factor 1; Short=NtERF1; AltName: Full=Ethylene-responsive element-binding factor 1; Short=EREBP-1 && PF00847:AP2 domain	AP2
Solyc03g115370.2.ITAG2.4	2480.14	2789.37	1494.09	333.615	343.712	461.853	2254.53	379.726	2.56963	6.58e-24	1.57e-21	Solyc03g115370.2	SL2.50ch03	65095281	65102063	+	2663	-	- && Q39017.2 RecName: Full=Diacylglycerol kinase 1; Short=AtDGK1; Short=DAG kinase 1; AltName: Full=Diglyceride kinase 1; Short=DGK 1 && PF00130:Phorbol esters/diacylglycerol binding domain (C1 domain)|PF00609:Diacylglycerol kinase accessory domain|PF00781:Diacylglycerol kinase catalytic domain	C1_1
Solyc09g007930.2.ITAG2.4	997.69	1092.98	1331.08	341.24	354.589	279.728	1140.58	325.186	1.81089	1.24e-23	2.93e-21	Solyc09g007930.2	SL2.50ch09	1438321	1439339	-	398	-	- && P35511.1 RecName: Full=Phenylalanine ammonia-lyase; Short=PAL && -	-
Solyc02g032860.2.ITAG2.4	34.0011	109.712	100.599	817.832	913.664	889.495	81.4374	873.664	-3.42409	1.3e-23	3.05e-21	Solyc02g032860.2	SL2.50ch02	29432759	29435213	+	1616	-	- && P92981.2 RecName: Full=5'-adenylylsulfate reductase 2, chloroplastic; AltName: Full=3'-phosphoadenosine-5'-phosphosulfate reductase homolog 43; Short=PAPS reductase homolog 43; Short=Prh-43; AltName: Full=Adenosine 5'-phosphosulfate 5'-adenylylsulfate sulfotransferase 2; Short=APS sulfotransferase 2; AltName: Full=Thioredoxin-independent APS reductase 2; Flags: Precursor && PF01507:Phosphoad…	-
Solyc02g083850.2.ITAG2.4	659.622	603.414	869.998	123.914	104.419	171.057	711.011	133.13	2.41627	1.33e-23	3.08e-21	Solyc02g083850.2	SL2.50ch02	47112182	47117181	-	1950	-	- && Q9FKW4.1 RecName: Full=Calcium-dependent protein kinase 28 && PF13499:EF-hand domain pair|PF00069:Protein kinase domain	Pkinase
Solyc04g072160.2.ITAG2.4	282.695	337.415	273.854	866.445	946.295	827.109	297.988	879.95	-1.56294	1.44e-23	3.31e-21	Solyc04g072160.2	SL2.50ch04	59180692	59183429	-	917	-	- && P0C8Z0.2 RecName: Full=Uncharacterized protein OsI_027940 && PF04969:CS domain	-
Solyc08g075370.2.ITAG2.4	10212	9267.53	9970.51	3456.25	3575.25	4313.65	9816.68	3781.72	1.37621	1.54e-23	3.5e-21	Solyc08g075370.2	SL2.50ch08	59508311	59509947	-	951	-	- && - && -	-
Solyc01g009780.2.ITAG2.4	1940.01	2198.37	2484.25	715.841	675.459	824.091	2207.54	738.464	1.57972	1.65e-23	3.72e-21	Solyc01g009780.2	SL2.50ch01	4205344	4209004	+	1003	-	- && - && PF10601:LITAF-like zinc ribbon domain	-
Solyc12g040790.1.ITAG2.4	965.632	948.074	903.531	3025.41	3928.76	2625.22	939.079	3193.13	-1.76555	6.29e-23	1.4e-20	Solyc12g040790.1	SL2.50ch12	42654871	42658545	+	1503	-	- && Q944H0.2 RecName: Full=Phosphomethylethanolamine N-methyltransferase; Short=AtPMEAMT; AltName: Full=Phosphoethanolamine N-methyltransferase 2 && PF13489:Methyltransferase domain|PF08241:Methyltransferase domain	Methyltransf_11
Solyc09g056450.2.ITAG2.4	1386.27	1192.34	1425.16	169.667	205.574	337.082	1334.59	237.441	2.49101	8.57e-23	1.89e-20	Solyc09g056450.2	SL2.50ch09	49222360	49224491	-	1743	-	- && Q9SRT0.1 RecName: Full=U-box domain-containing protein 9; AltName: Full=Plant U-box protein 9 && PF04564:U-box domain	U-box
Solyc01g086870.2.ITAG2.4	2901.75	4088.31	3150.25	645.306	734.194	992.129	3380.11	790.543	2.09615	8.92e-23	1.95e-20	Solyc01g086870.2	SL2.50ch01	81797188	81799514	-	1634	-	- && Q66GR3.1 RecName: Full=Transcription factor bHLH130; AltName: Full=Basic helix-loop-helix protein 130; Short=AtbHLH130; Short=bHLH 130; AltName: Full=Transcription factor EN 69; AltName: Full=bHLH transcription factor bHLH130 && PF00010:Helix-loop-helix DNA-binding domain	HLH
Solyc09g009130.2.ITAG2.4	285.609	327.065	260.813	28.5955	41.3324	59.3667	291.163	43.0982	2.75819	1.41e-22	3.04e-20	Solyc09g009130.2	SL2.50ch09	2464801	2466118	-	573	-	- && - && -	-
Solyc06g036290.2.ITAG2.4	178.749	207.003	292.483	1382.12	1443.37	910.625	226.078	1245.37	-2.46085	1.5e-22	3.21e-20	Solyc06g036290.2	SL2.50ch06	25803161	25806396	+	2385	-	- && P51819.1 RecName: Full=Heat shock protein 83 && PF02518:Histidine kinase-, DNA gyrase B-, and HSP90-like ATPase|PF00183:Hsp90 protein	HATPase_c
Solyc08g077440.2.ITAG2.4	4357	6252.53	4910.74	1229.61	959.347	1495.24	5173.42	1228.06	2.07448	1.59e-22	3.37e-20	Solyc08g077440.2	SL2.50ch08	61326655	61336566	-	3047	-	- && O04979.2 RecName: Full=Lon protease homolog 2, peroxisomal && PF02190:ATP-dependent protease La (LON) substrate-binding domain|PF00004:ATPase family associated with various cellular activities (AAA)|PF05362:Lon protease (S16) C-terminal proteolytic domain	AAA
Solyc04g079450.2.ITAG2.4	538.189	573.399	503.928	25.736	16.3154	68.4227	538.505	36.8247	3.86721	1.97e-22	4.14e-20	Solyc04g079450.2	SL2.50ch04	63945915	63946964	-	877	-	- && Q40066.1 RecName: Full=Serpin-ZX; AltName: Full=BSZx; AltName: Full=HorvuZx && PF00079:Serpin (serine protease inhibitor)	Serpin
Solyc07g043490.1.ITAG2.4	1214.33	1137.48	1062.81	4242.62	4327.94	2986.45	1138.21	3852.34	-1.75899	2.02e-22	4.21e-20	Solyc07g043490.1	SL2.50ch07	57317900	57319351	+	1452	-	- && Q9AT54.1 RecName: Full=Scopoletin glucosyltransferase; AltName: Full=Phenylpropanoid:glucosyltransferase 1 && PF00201:UDP-glucoronosyl and UDP-glucosyl transferase	UDPGT
Solyc08g014560.1.ITAG2.4	143.776	145.937	176.98	530.924	576.479	470.909	155.565	526.104	-1.75638	2.09e-22	4.3e-20	Solyc08g014560.1	SL2.50ch08	4750462	4754808	+	1191	-	- && P48979.1 RecName: Full=Polygalacturonase; Short=PG; AltName: Full=Pectinase; Flags: Precursor [Prunus persica] && PF00295:Glycosyl hydrolases family 28	-
Solyc02g083290.2.ITAG2.4	3389.43	3384.5	3837.68	1559.41	1407.48	1578.75	3537.2	1515.21	1.22296	2.18e-22	4.45e-20	Solyc02g083290.2	SL2.50ch02	46733351	46744107	-	2310	-	- && Q8RWL6.1 RecName: Full=Serine/threonine-protein kinase STY17; AltName: Full=Serine/threonine/tyrosine-protein kinase 17 && PF07714:Protein tyrosine kinase	Pkinase_Tyr
Solyc10g055810.1.ITAG2.4	18207.1	18034.1	17794.9	8249.81	7963.02	9187.76	18012	8466.86	1.08904	2.29e-22	4.65e-20	Solyc10g055810.1	SL2.50ch10	57417284	57418434	-	969	-	- && Q05538.1 RecName: Full=Basic 30 kDa endochitinase; Flags: Precursor && PF00182:Chitinase class I|PF00187:Chitin recognition protein	-
Solyc11g065620.1.ITAG2.4	1474.68	1412.8	1598.41	3657.37	3958.12	3299.38	1495.3	3638.29	-1.2826	2.64e-22	5.29e-20	Solyc11g065620.1	SL2.50ch11	51139649	51144003	+	2076	-	- && O82802.1 RecName: Full=Sulfite reductase 1 [ferredoxin], chloroplastic; Short=NtSiR1; Flags: Precursor && PF01077:Nitrite and sulphite reductase 4Fe-4S domain|PF03460:Nitrite/Sulfite reductase ferredoxin-like half domain	-
Solyc06g072670.2.ITAG2.4	170.977	178.023	176.049	3.81274	1.0877	0	175.016	1.63348	6.69903	2.66e-22	5.29e-20	Solyc06g072670.2	SL2.50ch06	44815712	44818045	-	1202	-	- && P0DKC6.1 RecName: Full=11-beta-hydroxysteroid dehydrogenase 1B; AltName: Full=17-beta-hydroxysteroid dehydrogenase 1B; AltName: Full=Hydroxysteroid dehydrogenase 1; Short=AtHSD1 >P0DKC5.1 RecName: Full=11-beta-hydroxysteroid dehydrogenase 1A; AltName: Full=17-beta-hydroxysteroid dehydrogenase 1A; AltName: Full=Hydroxysteroid dehydrogenase 1; Short=AtHSD1 && PF00106:short chain dehydrogenase	adh_short
Solyc01g107820.2.ITAG2.4	747.053	2480.93	2567.15	132.493	134.874	167.032	1931.71	144.8	3.73771	2.74e-22	5.41e-20	Solyc01g107820.2	SL2.50ch01	95232687	95234555	-	1869	-	- && Q9AT54.1 RecName: Full=Scopoletin glucosyltransferase; AltName: Full=Phenylpropanoid:glucosyltransferase 1 && PF00201:UDP-glucoronosyl and UDP-glucosyl transferase	UDPGT
Solyc03g080190.2.ITAG2.4	1267.76	2514.05	1963.55	244.968	315.432	375.318	1915.12	311.906	2.61851	2.9e-22	5.67e-20	Solyc03g080190.2	SL2.50ch03	52078938	52083877	-	1482	-	- && Q9FLV0.1 RecName: Full=Protein DOWNY MILDEW RESISTANCE 6; Short=AtDMR6; AltName: Full=2-oxoglutarate (2OG)-Fe(II) oxygenase-like protein DMR6; AltName: Full=Salicylate 3-hydroxylase DMR6; Short=S3H DMR6; Short=SA 3-hydroxylase DMR6; Short=Salicylic acid 3-hydroxylase DMR6 && PF03171:2OG-Fe(II) oxygenase superfamily|PF14226:non-haem dioxygenase in morphine synthesis N-terminal	2OG-FeII_Oxy
Solyc02g071560.2.ITAG2.4	2198.42	2659.99	3544.26	289.768	324.133	587.63	2800.89	400.51	2.806	3.35e-22	6.5e-20	Solyc02g071560.2	SL2.50ch02	40966108	40969226	-	2455	-	- && Q9FK76.1 RecName: Full=Subtilisin-like protease SBT5.6; AltName: Full=Subtilase subfamily 5 member 6; Short=AtSBT5.6; Flags: Precursor && PF05922:Peptidase inhibitor I9|PF00082:Subtilase family	Peptidase_S8
Solyc08g080570.2.ITAG2.4	2098.36	3187.85	2144.26	447.997	403.535	638.947	2476.82	496.826	2.31733	5.1e-22	9.79e-20	Solyc08g080570.2	SL2.50ch08	63829122	63832260	-	1491	-	- && Q42605.2 RecName: Full=Bifunctional UDP-glucose 4-epimerase and UDP-xylose 4-epimerase 1; AltName: Full=UDP-D-xylose 4-epimerase; AltName: Full=UDP-L-arabinose 4-epimerase; AltName: Full=UDP-galactose 4-epimerase 1; AltName: Full=UDP-glucose 4-epimerase 1; Short=AtUGE1 && PF16363:GDP-mannose 4,6 dehydratase	-
Solyc08g080500.2.ITAG2.4	2416.99	2622.73	2302.61	903.619	748.334	989.11	2447.44	880.354	1.47461	6.8e-22	1.3e-19	Solyc08g080500.2	SL2.50ch08	63777133	63781585	-	1520	-	- && Q9CAN1.1 RecName: Full=RHOMBOID-like protein 2; Short=AtRBL2 && PF01694:Rhomboid family	Rhomboid
Solyc08g065320.2.ITAG2.4	510.988	634.465	690.223	168.714	158.804	192.187	611.892	173.235	1.82012	7.89e-22	1.49e-19	Solyc08g065320.2	SL2.50ch08	53230306	53231498	+	948	-	- && F4ITL6.1 RecName: Full=Protein REVERSION-TO-ETHYLENE SENSITIVITY1 && PF05608:Protein of unknown function (DUF778)	-
Solyc08g016440.2.ITAG2.4	246.751	148.007	203.993	6.67229	5.43848	20.1243	199.584	10.745	4.21129	8.27e-22	1.55e-19	Solyc08g016440.2	SL2.50ch08	7582854	7585244	+	763	-	- && - && -	-
Solyc06g060700.1.ITAG2.4	990.89	991.545	1378.58	138.212	169.68	266.647	1120.34	191.513	2.54883	8.71e-22	1.62e-19	Solyc06g060700.1	SL2.50ch06	38718137	38718565	-	429	-	- && - && -	-
Solyc12g044330.1.ITAG2.4	36397.7	34229	30059.6	11058.8	8613.46	12353.3	33562.1	10675.2	1.65253	9.48e-22	1.75e-19	Solyc12g044330.1	SL2.50ch12	38616020	38617254	-	747	-	- && Q41951.2 RecName: Full=Aquaporin TIP2-1; AltName: Full=Delta-tonoplast intrinsic protein; Short=Delta-TIP; AltName: Full=Tonoplast intrinsic protein 2-1; Short=AtTIP2;1; Contains: RecName: Full=Aquaporin TIP2-1, N-terminally processed && PF00230:Major intrinsic protein	-
Solyc04g078290.2.ITAG2.4	287.552	422.286	428.479	70.5356	69.6125	87.5408	379.439	75.8963	2.32133	1.06e-21	1.94e-19	Solyc04g078290.2	SL2.50ch04	63048931	63051988	-	1736	-	- && Q0WTF4.1 RecName: Full=Cytochrome P450 81F3 && PF00067:Cytochrome P450	p450
Solyc03g118750.2.ITAG2.4	491.559	416.076	433.136	1496.5	1569.54	1159.16	446.924	1408.4	-1.65571	1.1e-21	1.99e-19	Solyc03g118750.2	SL2.50ch03	67580622	67586173	+	1714	-	- && Q944H0.2 RecName: Full=Phosphomethylethanolamine N-methyltransferase; Short=AtPMEAMT; AltName: Full=Phosphoethanolamine N-methyltransferase 2 && PF13489:Methyltransferase domain|PF08241:Methyltransferase domain	Methyltransf_11
Solyc12g056590.1.ITAG2.4	638.25	775.227	553.296	133.446	121.822	186.15	655.591	147.139	2.15451	2.3e-21	4.14e-19	Solyc12g056590.1	SL2.50ch12	62549007	62550542	+	933	-	- && Q70II3.2 RecName: Full=Ethylene-responsive transcription factor ERF110 && PF00847:AP2 domain	AP2
Solyc00g272810.1.ITAG2.4	348.754	367.431	333.468	13.3446	32.6309	51.317	349.884	32.4308	3.43578	2.4e-21	4.27e-19	Solyc00g272810.1	SL2.50ch00	20641054	20641779	-	726	-	- && Q9ZV06.1 RecName: Full=Probable acetyltransferase NATA1-like && PF00583:Acetyltransferase (GNAT) family	Acetyltransf_1
Solyc08g083330.2.ITAG2.4	3365.14	3409.34	4270.82	1345.9	1179.06	1415.75	3681.77	1313.57	1.48679	2.65e-21	4.69e-19	Solyc08g083330.2	SL2.50ch08	65820084	65825290	-	1861	-	- && - && -	-
Solyc00g233480.1.ITAG2.4	476.016	617.904	513.243	128.68	109.857	162.001	535.721	133.513	2.0029	2.67e-21	4.69e-19	Solyc00g233480.1	SL2.50ch00	19698473	19699024	-	552	-	- && Q8RWI9.2 RecName: Full=ABC transporter G family member 15; Short=ABC transporter ABCG.15; Short=AtABCG15; AltName: Full=White-brown complex homolog protein 15; Short=AtWBC15; AltName: Full=White-brown complex homolog protein 22; Short=AtWBC22 && PF00005:ABC transporter	ABC_tran
Solyc03g116030.2.ITAG2.4	2266.42	1858.89	2151.71	688.199	699.388	856.29	2092.34	747.959	1.48416	3.76e-21	6.56e-19	Solyc03g116030.2	SL2.50ch03	65556145	65561393	+	1124	-	- && - && PF12428:Protein of unknown function (DUF3675)|PF12906:RING-variant domain	-
Solyc06g063060.2.ITAG2.4	156.405	197.688	279.443	12.3914	10.877	26.1616	211.179	16.4767	3.67763	4.4e-21	7.6e-19	Solyc06g063060.2	SL2.50ch06	39811679	39813366	-	970	-	- && F4HV65.1 RecName: Full=Dormancy-associated protein homolog 4; AltName: Full=DRM1 homolog 4 && PF05564:Dormancy/auxin associated protein	-
Solyc05g051200.1.ITAG2.4	396.356	320.855	426.616	105.803	105.506	105.653	381.276	105.654	1.85222	6.14e-21	1.05e-18	Solyc05g051200.1	SL2.50ch05	61441957	61442631	-	675	-	- && Q8LDC8.2 RecName: Full=Ethylene-responsive transcription factor 1B; Short=AtERF1B; AltName: Full=Ethylene-responsive element-binding factor 1B; Short=EREBP-1B && PF00847:AP2 domain	AP2
Solyc11g005840.1.ITAG2.4	2210.07	3811.96	2499.15	610.038	585.18	735.544	2840.39	643.587	2.14167	8.47e-21	1.44e-18	Solyc11g005840.1	SL2.50ch11	672662	674975	-	1968	-	- && - && PF00266:Aminotransferase class-V	Aminotran_5
Solyc08g007840.1.ITAG2.4	125.318	151.112	134.132	0	2.17539	4.02486	136.854	2.06675	6.07494	8.63e-21	1.45e-18	Solyc08g007840.1	SL2.50ch08	2350901	2351573	-	456	-	- && Q9FJ90.1 RecName: Full=Ethylene-responsive transcription factor ERF025 && -	-
Solyc01g097270.2.ITAG2.4	5328.46	5951.34	6238.09	2127.51	1782.73	2409.89	5839.3	2106.71	1.47065	8.66e-21	1.45e-18	Solyc01g097270.2	SL2.50ch01	88179851	88181214	-	1009	-	- && P09762.1 RecName: Full=Wound-induced protein WIN2; Flags: Precursor && PF00967:Barwin family|PF00187:Chitin recognition protein	-
Solyc09g092430.2.ITAG2.4	3013.47	3373.12	2340.8	919.823	949.558	1011.25	2909.13	960.209	1.59905	8.76e-21	1.46e-18	Solyc09g092430.2	SL2.50ch09	71528327	71532358	+	1750	-	- && O23264.1 RecName: Full=Selenium-binding protein 1 && PF05694:56kDa selenium binding protein (SBP56)	-
Solyc09g005860.2.ITAG2.4	582.876	757.631	634.335	126.774	127.26	197.218	658.281	150.417	2.12919	1.17e-20	1.93e-18	Solyc09g005860.2	SL2.50ch09	602117	604953	+	1991	-	- && Q6AWW5.1 RecName: Full=Ankyrin repeat-containing protein At5g02620 && PF13962:Domain of unknown function|PF13637:Ankyrin repeats (many copies)|PF12796:Ankyrin repeats (3 copies)	-
Solyc06g050340.2.ITAG2.4	166.12	126.272	163.94	23.8296	21.7539	17.1057	152.11	20.8964	2.86356	1.25e-20	2.05e-18	Solyc06g050340.2	SL2.50ch06	32957612	32961166	-	964	-	- && - && -	-
Solyc12g088230.1.ITAG2.4	2110.01	2428.15	1495.95	449.903	332.835	523.232	2011.37	435.323	2.20732	1.39e-20	2.27e-18	Solyc12g088230.1	SL2.50ch12	63673907	63681540	-	2934	-	- && F4IBD7.1 RecName: Full=CSC1-like protein RXW8 && PF13967:Late exocytosis, associated with Golgi transport|PF02714:Calcium-dependent channel, 7TM region, putative phosphate	-
Solyc04g057890.2.ITAG2.4	841.285	918.059	855.095	342.193	266.485	333.057	871.479	313.912	1.47161	1.54e-20	2.48e-18	Solyc04g057890.2	SL2.50ch04	55012081	55014935	-	1125	-	- && O80662.1 RecName: Full=Glutathione S-transferase TCHQD; AltName: Full=Protein tetrachlorohydroquinone dehalogenase-homolog && PF13417:Glutathione S-transferase, N-terminal domain|PF13410:Glutathione S-transferase, C-terminal domain	-
Solyc02g088630.2.ITAG2.4	2537.46	2330.86	2337.07	1134.29	953.909	1051.5	2401.79	1046.56	1.19803	1.62e-20	2.6e-18	Solyc02g088630.2	SL2.50ch02	50656379	50661222	-	2226	-	- && Q8GWT1.1 RecName: Full=Probable galacturonosyltransferase 14 && PF01501:Glycosyl transferase family 8	Glyco_transf_8
Solyc12g049530.1.ITAG2.4	375.955	460.582	521.626	107.71	117.471	134.833	452.721	120.005	1.91618	2.01e-20	3.21e-18	Solyc12g049530.1	SL2.50ch12	36706034	36706333	+	177	-	- && - && -	-
Solyc01g108210.2.ITAG2.4	470.187	233.914	100.599	6.67229	2.17539	2.01243	268.233	3.62004	6.18909	2.04e-20	3.23e-18	Solyc01g108210.2	SL2.50ch01	95570775	95574281	+	1473	-	- && Q9LJK2.2 RecName: Full=Abscisic acid 8'-hydroxylase 4; Short=ABA 8'-hydroxylase 4; AltName: Full=Cytochrome P450 707A4 && PF00067:Cytochrome P450	p450
Solyc08g007460.2.ITAG2.4	1207.53	1820.59	2094.89	407.963	403.535	443.741	1707.67	418.413	2.02902	2.12e-20	3.33e-18	Solyc08g007460.2	SL2.50ch08	2031768	2034424	+	742	-	- && - && PF14368:Probable lipid transfer	-
Solyc05g051900.2.ITAG2.4	564.419	526.823	628.746	62.9102	68.5248	135.839	573.329	89.0914	2.68591	2.29e-20	3.57e-18	Solyc05g051900.2	SL2.50ch05	62295650	62298674	-	1779	-	- && - && PF07690:Major Facilitator Superfamily	MFS_1
Solyc02g068430.2.ITAG2.4	4312.31	4471.27	3326.3	1511.75	1291.09	1460.02	4036.63	1420.95	1.50601	2.77e-20	4.29e-18	Solyc02g068430.2	SL2.50ch02	38380080	38387259	-	1398	-	- && F4JJE0.1 RecName: Full=Choline-phosphate cytidylyltransferase 2; Short=AtCCT2; AltName: Full=CTP:phosphocholine cytidylyltransferase 2; AltName: Full=Phosphorylcholine transferase 2 && PF01467:Cytidylyltransferase-like	CTP_transf_2
Solyc09g065540.2.ITAG2.4	2706.49	2504.74	2338.94	865.491	770.088	1051.5	2516.72	895.692	1.49018	3.06e-20	4.69e-18	Solyc09g065540.2	SL2.50ch09	63660597	63674782	+	2430	-	- && Q42777.2 RecName: Full=Methylcrotonoyl-CoA carboxylase subunit alpha, mitochondrial; Short=MCCase subunit alpha; AltName: Full=3-methylcrotonyl-CoA carboxylase 1; AltName: Full=3-methylcrotonyl-CoA:carbon dioxide ligase subunit alpha; Flags: Precursor && PF00364:Biotin-requiring enzyme|PF02785:Biotin carboxylase C-terminal domain|PF02786:Carbamoyl-phosphate synthase L chain, ATP binding doma…	CPSase_L_D2
Solyc06g072110.2.ITAG2.4	1940.98	1265.82	1671.07	468.013	475.323	512.164	1625.96	485.167	1.74492	3.07e-20	4.69e-18	Solyc06g072110.2	SL2.50ch06	44438351	44446456	+	2897	-	- && O94464.3 RecName: Full=Uncharacterized protein C23G7.06c && -	-
Solyc02g090590.1.ITAG2.4	28.1724	22.7703	13.0407	159.182	208.838	155.963	21.3278	174.661	-3.03741	3.39e-20	5.15e-18	Solyc02g090590.1	SL2.50ch02	52145494	52145742	-	249	-	- && - && -	-
Solyc01g108250.2.ITAG2.4	1482.45	1739.86	1573.26	427.027	387.22	589.642	1598.52	467.963	1.77185	3.95e-20	5.95e-18	Solyc01g108250.2	SL2.50ch01	95622069	95625326	+	2347	-	- && P40781.1 RecName: Full=Protein CYPRO4 [Cynara cardunculus] && PF08553:VID27 cytoplasmic protein	-
Solyc12g045030.1.ITAG2.4	2882.32	3024.32	3357.04	1186.71	1064.85	1361.41	3087.89	1204.33	1.35823	4.69e-20	7.03e-18	Solyc12g045030.1	SL2.50ch12	37460978	37461986	-	816	-	- && Q21929.2 RecName: Full=L-xylulose reductase; Short=XR; AltName: Full=Dicarbonyl/L-xylulose reductase; Short=DCXR; AltName: Full=Short-chain dehydrogenase 21 && PF00106:short chain dehydrogenase	adh_short
Solyc05g050220.2.ITAG2.4	145.719	114.887	140.653	20.0169	13.0523	10.0622	133.753	14.3771	3.21044	6.21e-20	9.25e-18	Solyc05g050220.2	SL2.50ch05	60269315	60274218	+	1538	-	- && Q99089.1 RecName: Full=Common plant regulatory factor 1; Short=CPRF-1 && PF16596:Disordered region downstream of MFMR|PF07777:G-box binding protein MFMR|PF00170:bZIP transcription factor	MFMR
Solyc07g063870.2.ITAG2.4	833.513	887.008	851.369	258.313	268.661	350.163	857.297	292.379	1.55186	6.82e-20	1.01e-17	Solyc07g063870.2	SL2.50ch07	66229050	66232522	+	1394	-	- && - && -	-
Solyc01g005470.2.ITAG2.4	242.865	438.847	410.781	61.0038	68.5248	54.3356	364.164	61.2881	2.57189	8.09e-20	1.19e-17	Solyc01g005470.2	SL2.50ch01	322628	324932	-	750	-	- && Q9LQU4.1 RecName: Full=Protein PLANT CADMIUM RESISTANCE 2; Short=AtPCR2 && PF04749:PLAC8 family	-
Solyc01g109710.2.ITAG2.4	205.95	191.478	410.781	15.2509	30.4555	21.1305	269.403	22.279	3.6043	8.91e-20	1.3e-17	Solyc01g109710.2	SL2.50ch01	96600712	96603524	-	1019	-	- && - && PF00582:Universal stress protein family	Usp
Solyc02g079960.2.ITAG2.4	834.485	847.678	995.747	305.972	332.835	363.244	892.637	334.017	1.41873	1.19e-19	1.73e-17	Solyc02g079960.2	SL2.50ch02	44333446	44337341	+	766	-	- && Q8LDI5.2 RecName: Full=Thioredoxin-like protein CXXS1; Short=AtCXXS1; AltName: Full=Mono-cysteine thioredoxin 1 && PF00085:Thioredoxin	-
Solyc02g088340.2.ITAG2.4	507.102	867.343	980.844	81.0207	113.12	151.939	785.096	115.36	2.7676	1.27e-19	1.83e-17	Solyc02g088340.2	SL2.50ch02	50467977	50470729	-	1734	-	- && Q9ZQ70.1 RecName: Full=Probable WRKY transcription factor 3; AltName: Full=WRKY DNA-binding protein 3 && PF03106:WRKY DNA -binding domain	WRKY
Solyc01g066910.2.ITAG2.4	58.2876	54.8558	59.6144	264.985	202.311	248.535	57.586	238.611	-2.05122	1.52e-19	2.17e-17	Solyc01g066910.2	SL2.50ch01	75179261	75179854	+	594	-	- && - && PF14368:Probable lipid transfer	-
Solyc02g086970.2.ITAG2.4	1148.27	1350.7	1306.86	2914.84	2854.11	2662.45	1268.61	2810.47	-1.14767	1.62e-19	2.3e-17	Solyc02g086970.2	SL2.50ch02	49535823	49539738	-	1836	-	- && Q8S528.2 RecName: Full=Aldehyde dehydrogenase family 2 member B7, mitochondrial; Short=ALDH2b; Flags: Precursor && PF00171:Aldehyde dehydrogenase family	Aldedh
Solyc01g097340.2.ITAG2.4	346.811	335.345	303.661	950.325	770.088	934.774	328.606	885.062	-1.43021	1.79e-19	2.53e-17	Solyc01g097340.2	SL2.50ch01	88238629	88241833	+	1552	-	- && A3C4S4.1 RecName: Full=GDP-mannose 3,5-epimerase 1; Short=GDP-Man 3,5-epimerase 1; AltName: Full=OsGME-1 && PF01370:NAD dependent epimerase/dehydratase family	Epimerase
Solyc05g054250.1.ITAG2.4	1300.79	1363.12	1179.25	47.6592	73.9633	193.193	1281.05	104.939	3.60988	1.87e-19	2.63e-17	Solyc05g054250.1	SL2.50ch05	64208785	64209747	-	963	-	- && F4JZL7.1 RecName: Full=Heavy metal-associated isoprenylated plant protein 33; Short=AtHIP33; Flags: Precursor && PF00403:Heavy-metal-associated domain	HMA
Solyc08g074550.2.ITAG2.4	5620.87	5217.51	3813.46	1622.32	1688.1	1621.01	4883.95	1643.81	1.57098	1.99e-19	2.78e-17	Solyc08g074550.2	SL2.50ch08	58646388	58660514	+	2349	-	- && O04630.3 RecName: Full=Threonine--tRNA ligase, mitochondrial 1; AltName: Full=AtSYT1; AltName: Full=Threonyl-tRNA synthetase; Short=ThrRS; Flags: Precursor && PF02824:TGS domain|PF00587:tRNA synthetase class II core domain (G, H, P, S and T)|PF03129:Anticodon binding domain|PF07973:Threonyl and Alanyl tRNA synthetase second additional domain	tRNA-synt_2b
Solyc08g080940.2.ITAG2.4	6931.37	8959.1	8860.2	3271.33	2846.5	3320.51	8250.22	3146.11	1.39077	2.64e-19	3.66e-17	Solyc08g080940.2	SL2.50ch08	64084698	64087731	+	1022	-	- && O24031.1 RecName: Full=Probable phospholipid hydroperoxide glutathione peroxidase; Short=PHGPx && PF00255:Glutathione peroxidase	GSHPx
Solyc03g115860.2.ITAG2.4	2178.99	2331.89	2094.89	920.776	971.312	1075.64	2201.92	989.244	1.15435	2.8e-19	3.86e-17	Solyc03g115860.2	SL2.50ch03	65461944	65465337	-	853	-	- && O13737.2 RecName: Full=Uncharacterized endoplasmic reticulum membrane protein C16E8.02 && PF06127:Protein of unknown function (DUF962)	-
Solyc04g079420.2.ITAG2.4	363.326	564.084	505.791	79.1143	85.9279	123.765	477.734	96.2689	2.31094	2.98e-19	4.09e-17	Solyc04g079420.2	SL2.50ch04	63928054	63931589	+	2698	-	- && Q9SZA7.3 RecName: Full=Probable disease resistance protein At4g33300 && PF05659:Arabidopsis broad-spectrum mildew resistance protein RPW8|PF00931:NB-ARC domain	NB-ARC
Solyc09g075890.2.ITAG2.4	3126.16	4166.97	5302.89	870.257	771.176	1191.36	4198.67	944.264	2.15257	3.2e-19	4.36e-17	Solyc09g075890.2	SL2.50ch09	67529583	67532130	-	1050	-	- && - && PF13419:Haloacid dehalogenase-like hydrolase	-
Solyc10g086520.1.ITAG2.4	398.299	449.197	456.423	1002.75	1006.12	962.948	434.64	990.606	-1.18847	3.47e-19	4.7e-17	Solyc10g086520.1	SL2.50ch10	65310504	65311884	-	636	-	- && O80932.1 RecName: Full=Expansin-A3; Short=AtEXPA3; AltName: Full=Alpha-expansin-3; Short=At-EXP3; Short=AtEx3; AltName: Full=Ath-ExpAlpha-1.9; Flags: Precursor && PF01357:Pollen allergen|PF03330:Rare lipoprotein A (RlpA)-like double-psi beta-barrel	-
Solyc00g257110.2.ITAG2.4	75.7739	65.206	80.1069	242.109	298.029	275.703	73.6956	271.947	-1.88088	4.21e-19	5.67e-17	Solyc00g257110.2	SL2.50ch00	20272521	20276002	-	1961	-	- && Q9M2A0.1 RecName: Full=ATPase 8, plasma membrane-type; AltName: Full=Proton pump 8 && PF00702:haloacid dehalogenase-like hydrolase	Hydrolase
Solyc04g011490.2.ITAG2.4	658.65	884.938	845.78	134.399	157.716	236.461	796.456	176.192	2.17663	4.53e-19	6.06e-17	Solyc04g011490.2	SL2.50ch04	3923552	3925091	+	768	-	- && A1XGB4.1 RecName: Full=CASP-like protein PIMP1; AltName: Full=CASP-like protein 4D1; Short=CaCASPL4D1; AltName: Full=Pathogen-induced membrane protein 1; Short=CaPIMP1 && PF04535:Domain of unknown function (DUF588)	-
Solyc12g096830.1.ITAG2.4	593.562	624.114	785.234	168.714	202.311	225.392	667.637	198.806	1.7488	4.62e-19	6.14e-17	Solyc12g096830.1	SL2.50ch12	65588177	65590134	+	1362	-	- && Q9SYK9.1 RecName: Full=UDP-glycosyltransferase 74E2 && PF00201:UDP-glucoronosyl and UDP-glucosyl transferase	UDPGT
Solyc12g005920.1.ITAG2.4	111.718	146.972	145.31	0.953184	4.35078	0	134.667	1.76799	6.31195	5.22e-19	6.9e-17	Solyc12g005920.1	SL2.50ch12	547657	552765	+	1995	-	- && Q9FKI0.1 RecName: Full=Fimbrin-5; Short=AtFIM5; AltName: Full=Fimbrin-like protein 2; AltName: Full=Fimbrin5 && PF00307:Calponin homology (CH) domain	CH
Solyc11g068440.1.ITAG2.4	1492.16	1994.48	2547.59	533.783	556.9	571.531	2011.41	554.071	1.86021	7.73e-19	1.02e-16	Solyc11g068440.1	SL2.50ch11	53170046	53173336	+	1143	-	- && Q9ZQG9.2 RecName: Full=Glucan endo-1,3-beta-glucosidase 14; AltName: Full=(1->3)-beta-glucan endohydrolase 14; Short=(1->3)-beta-glucanase 14; AltName: Full=Beta-1,3-endoglucanase 14; Short=Beta-1,3-glucanase 14; Flags: Precursor && PF00332:Glycosyl hydrolases family 17	Glyco_hydro_17
Solyc10g005950.2.ITAG2.4	523.617	559.943	481.573	152.509	156.628	96.5967	521.711	135.245	1.94801	1.03e-18	1.35e-16	Solyc10g005950.2	SL2.50ch10	733326	738148	+	1122	-	- && Q94B74.1 RecName: Full=Nudix hydrolase 2; Short=AtNUDT2; AltName: Full=ADP-ribose pyrophosphatase; AltName: Full=NADH pyrophosphatase && PF00293:NUDIX domain	NUDIX
Solyc06g060110.2.ITAG2.4	4401.69	3947.55	3933.62	1905.42	2100.34	1952.06	4094.29	1985.94	1.04396	1.51e-18	1.97e-16	Solyc06g060110.2	SL2.50ch06	38031206	38033821	-	2025	-	- && Q39134.2 RecName: Full=Amino acid permease 3; AltName: Full=Amino acid transporter AAP3 && PF01490:Transmembrane amino acid transporter protein	Aa_trans
Solyc04g077230.1.ITAG2.4	1834.12	2496.46	3076.66	454.669	588.443	701.332	2469.08	581.481	2.08646	1.57e-18	2.02e-16	Solyc04g077230.1	SL2.50ch04	62173911	62174135	+	225	-	- && - && -	-
Solyc06g082440.1.ITAG2.4	2619.06	3271.68	2859.63	266.892	306.73	679.196	2916.79	417.606	2.80411	1.62e-18	2.08e-16	Solyc06g082440.1	SL2.50ch06	48251823	48253082	-	1260	-	- && O22932.1 RecName: Full=CBL-interacting serine/threonine-protein kinase 11; AltName: Full=SNF1-related kinase 3.22; AltName: Full=SOS2-like protein kinase PKS5; AltName: Full=SOS3-interacting protein 4 && PF03822:NAF domain|PF00069:Protein kinase domain	Pkinase
Solyc12g098520.1.ITAG2.4	923.859	896.324	892.354	343.146	329.572	414.561	904.179	362.426	1.31858	1.92e-18	2.45e-16	Solyc12g098520.1	SL2.50ch12	65999627	66003357	-	1437	-	- && Q94BZ5.1 RecName: Full=Heat stress transcription factor A-5; Short=AtHsfA5; AltName: Full=AtHsf-12 && PF00447:HSF-type DNA-binding	HSF_DNA-bind
Solyc01g079260.2.ITAG2.4	372.069	544.418	706.99	70.5356	106.594	107.665	541.159	94.9316	2.51317	1.93e-18	2.45e-16	Solyc01g079260.2	SL2.50ch01	78355436	78357892	+	1246	-	- && Q8VWJ2.1 RecName: Full=Probable WRKY transcription factor 28; AltName: Full=WRKY DNA-binding protein 28 && PF03106:WRKY DNA -binding domain	WRKY
Solyc07g055710.2.ITAG2.4	224.407	425.391	414.507	56.2379	43.5078	64.3978	354.768	54.7145	2.69469	2.19e-18	2.77e-16	Solyc07g055710.2	SL2.50ch07	63648888	63650452	-	1477	-	- && Q9FK72.1 RecName: Full=Heat stress transcription factor A-4c; Short=AtHsfA4c; AltName: Full=AtHsf-20; AltName: Full=Protein ROOT HANDEDNESS 1 && PF00447:HSF-type DNA-binding	HSF_DNA-bind
Solyc06g073220.1.ITAG2.4	70.9166	71.4161	58.683	241.156	226.241	238.473	67.0052	235.29	-1.81426	2.68e-18	3.36e-16	Solyc06g073220.1	SL2.50ch06	45117088	45117540	+	453	-	- && Q9FLQ0.1 RecName: Full=Stigma-specific STIG1-like protein 2; Flags: Precursor && PF04885:Stigma-specific protein, Stig1	-
Solyc03g080090.2.ITAG2.4	4166.6	4211.48	5255.39	1152.4	1089.87	1683.4	4544.49	1308.56	1.79609	3.07e-18	3.84e-16	Solyc03g080090.2	SL2.50ch03	51994844	51999842	+	2351	-	- && Q9LKG8.1 RecName: Full=NAC domain-containing protein 91; Short=ANAC091; AltName: Full=TCV-interacting protein && PF02365:No apical meristem (NAM) protein	NAM
Solyc04g081960.1.ITAG2.4	265.209	466.792	498.339	38.1274	30.4555	72.4475	410.113	47.0101	3.12317	3.89e-18	4.83e-16	Solyc04g081960.1	SL2.50ch04	65796543	65797250	-	708	-	- && Q9SGS5.1 RecName: Full=Uncharacterized protein At1g76070 && -	-
Solyc11g006720.1.ITAG2.4	542.075	552.698	551.434	83.8802	107.682	168.038	548.736	119.867	2.19531	5.49e-18	6.75e-16	Solyc11g006720.1	SL2.50ch11	1335552	1337261	+	633	-	- && Q8S9H7.1 RecName: Full=Transcription factor DIVARICATA && PF00249:Myb-like DNA-binding domain	Myb_DNA-binding
Solyc04g074270.2.ITAG2.4	3410.8	2964.28	1895.55	611.944	537.322	770.761	2756.88	640.009	2.10662	5.96e-18	7.28e-16	Solyc04g074270.2	SL2.50ch04	60269968	60272626	+	2332	-	- && - && PF13855:Leucine rich repeat	-
Solyc03g005260.2.ITAG2.4	615.906	602.379	839.259	2012.17	2049.22	1802.13	685.848	1954.51	-1.5103	6.47e-18	7.86e-16	Solyc03g005260.2	SL2.50ch03	148411	153101	-	1854	-	- && Q9LIK9.1 RecName: Full=ATP sulfurylase 1, chloroplastic; Short=AtPS1; Flags: Precursor && PF14306:PUA-like domain|PF01747:ATP-sulfurylase	-
Solyc03g119240.2.ITAG2.4	1317.3	1282.38	1003.2	431.792	439.429	480.971	1200.96	450.731	1.41363	7.58e-18	9.11e-16	Solyc03g119240.2	SL2.50ch03	67885698	67889242	+	2239	-	- && P0C5E2.3 RecName: Full=LEAF RUST 10 DISEASE-RESISTANCE LOCUS RECEPTOR-LIKE PROTEIN KINASE-like 1.2; AltName: Full=Probable receptor-like serine/threonine-protein kinase LRK10L-1.2; Flags: Precursor && PF00069:Protein kinase domain|PF13947:Wall-associated receptor kinase galacturonan-binding|PF14380:Wall-associated receptor kinase C-terminal	Pkinase
Solyc05g051530.2.ITAG2.4	2858.04	4142.13	5060.71	852.147	1013.73	1176.27	4020.29	1014.05	1.9873	9.81e-18	1.17e-15	Solyc05g051530.2	SL2.50ch05	61891814	61894245	-	1867	-	- && Q8RXN0.1 RecName: Full=ABC transporter G family member 11; Short=ABC transporter ABCG.11; Short=AtABCG11; AltName: Full=Protein CUTICULAR DEFECT AND ORGAN FUSION 1; AltName: Full=Protein DESPERADO; AltName: Full=Protein PERMEABLE LEAVES 1; AltName: Full=White-brown complex homolog protein 11; Short=AtWBC11 && PF00005:ABC transporter|PF01061:ABC-2 type transporter	ABC2_membrane
Solyc08g078510.2.ITAG2.4	3087.3	3340	4555.85	362.21	461.183	885.47	3661.05	569.621	2.68426	9.85e-18	1.17e-15	Solyc08g078510.2	SL2.50ch08	62288948	62290978	-	1497	-	- && Q9LYV6.1 RecName: Full=GEM-like protein 5 && PF02893:GRAM domain	GRAM
Solyc11g072550.1.ITAG2.4	2337.33	3058.47	3456.71	839.755	789.667	1070.61	2950.84	900.012	1.71302	1.05e-17	1.24e-15	Solyc11g072550.1	SL2.50ch11	55734809	55737564	+	828	-	- && Q949R4.1 RecName: Full=Extradiol ring-cleavage dioxygenase; Short=AtLigB && PF02900:Catalytic LigB subunit of aromatic ring-opening dioxygenase	-
Solyc08g082950.2.ITAG2.4	22.3436	15.5252	8.38328	127.727	155.54	121.752	15.4174	135.006	-3.13443	1.16e-17	1.36e-15	Solyc08g082950.2	SL2.50ch08	65593293	65595446	+	1497	-	- && O23086.2 RecName: Full=Aluminum-activated malate transporter 10; Short=AtALMT10 && PF11744:Aluminium activated malate transporter	-
Solyc04g009860.2.ITAG2.4	1426.1	1521.47	1233.27	560.472	549.286	627.879	1393.62	579.212	1.26631	1.25e-17	1.46e-15	Solyc04g009860.2	SL2.50ch04	3173261	3175305	-	1479	-	- && Q84MB3.1 RecName: Full=1-aminocyclopropane-1-carboxylate oxidase homolog 1 && PF14226:non-haem dioxygenase in morphine synthesis N-terminal|PF03171:2OG-Fe(II) oxygenase superfamily	2OG-FeII_Oxy
Solyc06g069120.2.ITAG2.4	5068.11	4681.38	6811.88	1988.34	1981.78	2005.39	5520.46	1991.84	1.47076	1.46e-17	1.7e-15	Solyc06g069120.2	SL2.50ch06	42902101	42903774	+	1107	-	- && - && -	-
Solyc04g005480.1.ITAG2.4	3023.19	2685.87	3679.33	197.309	230.591	615.804	3129.46	347.902	3.16913	1.61e-17	1.87e-15	Solyc04g005480.1	SL2.50ch04	323321	323833	-	513	-	- && Q9ZQ80.1 RecName: Full=Nodulin-related protein 1; Short=AtNRP1; AltName: Full=RPS2-interacting protein 11 && -	-
Solyc12g013620.1.ITAG2.4	105.889	153.182	169.529	11.4382	6.52617	20.1243	142.867	12.6962	3.48444	1.75e-17	2.01e-15	Solyc12g013620.1	SL2.50ch12	4462011	4464637	-	1050	-	- && Q93VY3.1 RecName: Full=NAC domain-containing protein 72; Short=ANAC072; AltName: Full=Protein RESPONSIVE TO DESICCATION 26 && PF02365:No apical meristem (NAM) protein	NAM
Solyc03g059260.2.ITAG2.4	178.749	217.353	219.828	56.2379	47.8586	51.317	205.31	51.8045	1.98446	1.76e-17	2.02e-15	Solyc03g059260.2	SL2.50ch03	28184580	28189375	-	1833	-	- && F4J3G5.1 RecName: Full=Carboxyl-terminal-processing peptidase 3, chloroplastic; AltName: Full=D1 C-terminal processing protease 3; AltName: Full=Photosystem II D1 protein processing peptidase 3; Flags: Precursor && PF03572:Peptidase family S41|PF13180:PDZ domain	Peptidase_S41
Solyc05g014260.2.ITAG2.4	917.059	785.577	814.11	294.534	323.046	370.287	838.915	329.289	1.34958	3.21e-17	3.66e-15	Solyc05g014260.2	SL2.50ch05	8044502	8048496	+	1833	-	- && Q9FXD6.1 RecName: Full=Two-component response regulator ARR11; AltName: Full=Receiver-like protein 3 && PF00249:Myb-like DNA-binding domain|PF00072:Response regulator receiver domain	Response_reg
Solyc09g011880.2.ITAG2.4	1940.98	1924.09	2433.95	898.853	892.998	842.203	2099.67	878.018	1.25802	3.29e-17	3.74e-15	Solyc09g011880.2	SL2.50ch09	5155740	5160598	-	1749	-	- && - && -	-
Solyc01g106260.2.ITAG2.4	2288.76	2117.64	2318.44	5049.97	5882.26	4556.14	2241.62	5162.79	-1.20346	3.76e-17	4.24e-15	Solyc01g106260.2	SL2.50ch01	94215968	94220340	+	2439	-	- && Q08276.1 RecName: Full=Heat shock 70 kDa protein, mitochondrial; Flags: Precursor && PF00012:Hsp70 protein	HSP70
Solyc11g068920.1.ITAG2.4	192.349	225.633	222.623	48.6124	54.3848	64.3978	213.535	55.7983	1.93701	4.18e-17	4.7e-15	Solyc11g068920.1	SL2.50ch11	53482855	53484069	+	1215	-	- && Q84TG3.1 RecName: Full=E3 ubiquitin-protein ligase PUB23; AltName: Full=Plant U-box protein 23; AltName: Full=U-box domain-containing protein 23 && PF04564:U-box domain	U-box
Solyc11g066140.1.ITAG2.4	80.6312	65.206	26.0813	420.354	381.781	419.592	57.3062	407.242	-2.83213	4.49e-17	5.02e-15	Solyc11g066140.1	SL2.50ch11	51831534	51834918	+	2433	-	- && - && PF13515:Fusaric acid resistance protein-like	-
Solyc07g047800.2.ITAG2.4	4328.83	5791.95	5625.18	2012.17	2110.13	2250.9	5248.65	2124.4	1.3049	8.76e-17	9.7e-15	Solyc07g047800.2	SL2.50ch07	59011186	59016715	-	1393	-	- && Q9LBG2.1 RecName: Full=Levodione reductase; AltName: Full=(6R)-2,2,6-trimethyl-1,4-cyclohexanedione reductase && PF13561:Enoyl-(Acyl carrier protein) reductase	-
Solyc02g082830.1.ITAG2.4	1479.53	1205.79	1329.22	3374.27	3578.52	2823.44	1338.18	3258.74	-1.28387	9.06e-17	9.98e-15	Solyc02g082830.1	SL2.50ch02	46479003	46480301	+	1299	-	- && Q96255.1 RecName: Full=Phosphoserine aminotransferase 1, chloroplastic; Short=AtPSAT1; AltName: Full=Phosphohydroxythreonine aminotransferase; Flags: Precursor && PF00266:Aminotransferase class-V	Aminotran_5
Solyc09g098310.2.ITAG2.4	5943.4	5800.23	6522.19	2158.96	2313.53	2916.01	6088.61	2462.83	1.30584	9.7e-17	1.06e-14	Solyc09g098310.2	SL2.50ch09	72172067	72174015	+	705	-	- && - && -	-
Solyc08g082820.2.ITAG2.4	5952.14	5785.74	5872.95	13683	14105.2	11078.4	5870.28	12955.5	-1.14205	9.98e-17	1.09e-14	Solyc08g082820.2	SL2.50ch08	65489311	65493585	+	2387	-	- && P49118.1 RecName: Full=Luminal-binding protein; Short=BiP; AltName: Full=78 kDa glucose-regulated protein homolog; Short=GRP-78; Flags: Precursor && PF00012:Hsp70 protein	HSP70
Solyc06g050630.2.ITAG2.4	911.23	1084.7	1457.76	200.169	171.856	328.026	1151.23	233.35	2.30222	1.29e-16	1.4e-14	Solyc06g050630.2	SL2.50ch06	33367172	33368983	-	1221	-	- && Q944B6.1 RecName: Full=Arogenate dehydrogenase 1, chloroplastic; AltName: Full=TYRATC; AltName: Full=TyrAAT1; Flags: Precursor && PF02153:Prephenate dehydrogenase	-
Solyc03g097580.2.ITAG2.4	19.4292	18.6303	12.1092	124.867	139.225	97.6029	16.7229	120.565	-2.85401	1.46e-16	1.58e-14	Solyc03g097580.2	SL2.50ch03	59908322	59910086	-	1236	-	- && Q9LUE3.1 RecName: Full=Bidirectional sugar transporter SWEET10; Short=AtSWEET10; AltName: Full=Protein SUGARS WILL EVENTUALLY BE EXPORTED TRANSPORTERS 10 && PF03083:Sugar efflux transporter for intercellular exchange	-
Solyc08g066440.2.ITAG2.4	1144.38	1160.25	1014.38	389.852	311.081	461.853	1106.34	387.595	1.51224	1.51e-16	1.62e-14	Solyc08g066440.2	SL2.50ch08	55068480	55072635	-	1530	-	- && Q99685.2 RecName: Full=Monoglyceride lipase; Short=MGL; AltName: Full=HU-K5; AltName: Full=Lysophospholipase homolog; AltName: Full=Lysophospholipase-like; AltName: Full=Monoacylglycerol lipase; Short=MAGL && PF12146:Serine aminopeptidase, S33	-
Solyc08g075540.2.ITAG2.4	1674.8	2002.76	2868.94	473.733	413.324	658.065	2182.17	515.041	2.08285	1.52e-16	1.62e-14	Solyc08g075540.2	SL2.50ch08	59711798	59713604	-	1482	-	- && Q41224.1 RecName: Full=Ubiquinol oxidase 1, mitochondrial; AltName: Full=Alternative oxidase 1; Flags: Precursor && PF01786:Alternative oxidase	AOX
Solyc04g082410.2.ITAG2.4	1676.74	1852.68	2040.86	845.474	762.474	876.414	1856.76	828.121	1.16465	1.72e-16	1.84e-14	Solyc04g082410.2	SL2.50ch04	66078374	66081848	-	1489	-	- && Q8LEV3.1 RecName: Full=BTB/POZ domain-containing protein At2g30600 && PF00754:F5/8 type C domain|PF07707:BTB And C-terminal Kelch	F5_F8_type_C
Solyc10g086570.2.ITAG2.4	308.925	371.571	509.517	61.0038	54.3848	100.622	396.671	72.0034	2.46103	1.75e-16	1.86e-14	Solyc10g086570.2	SL2.50ch10	65359647	65360356	-	627	-	- && - && -	-
Solyc06g061080.2.ITAG2.4	189.435	274.279	501.134	17.1573	32.6309	40.2486	321.616	30.0123	3.42558	2.24e-16	2.37e-14	Solyc06g061080.2	SL2.50ch06	39109247	39111108	+	1199	-	- && Q9FFI5.1 RecName: Full=NAC domain-containing protein 86; AltName: Full=NAM-like protein; AltName: Full=No apical meristem-like protein && PF02365:No apical meristem (NAM) protein	NAM
Solyc05g007060.2.ITAG2.4	483.787	503.018	445.245	137.259	137.05	192.187	477.35	155.498	1.61758	2.5e-16	2.63e-14	Solyc05g007060.2	SL2.50ch05	1644471	1649129	-	1651	-	- && Q33BW6.1 RecName: Full=NAD(P)H-quinone oxidoreductase subunit H, chloroplastic; AltName: Full=NAD(P)H dehydrogenase subunit H; AltName: Full=NADH-plastoquinone oxidoreductase 49 kDa subunit; AltName: Full=NADH-plastoquinone oxidoreductase subunit H && PF07063:Domain of unknown function (DUF1338)	-
Solyc05g054210.2.ITAG2.4	155.434	136.622	114.571	468.967	383.956	391.418	135.542	414.78	-1.61497	3.34e-16	3.49e-14	Solyc05g054210.2	SL2.50ch05	64171141	64173100	-	1416	-	- && - && -	-
Solyc01g091160.2.ITAG2.4	519.731	534.068	463.875	160.135	144.663	206.274	505.891	170.358	1.56912	3.64e-16	3.79e-14	Solyc01g091160.2	SL2.50ch01	84851869	84856228	+	1529	-	- && P46637.1 RecName: Full=Arginase 1, mitochondrial; AltName: Full=Arginine amidohydrolase 1; Flags: Precursor && PF00491:Arginase family	-
Solyc12g088200.1.ITAG2.4	483.787	406.761	436.862	140.118	135.962	179.106	442.47	151.729	1.54382	3.69e-16	3.82e-14	Solyc12g088200.1	SL2.50ch12	63646021	63651044	+	1011	-	- && Q9SUG3.2 RecName: Full=Inositol-tetrakisphosphate 1-kinase 3; AltName: Full=Inositol 1,3,4-trisphosphate 5/6-kinase 3; Short=AtItpk-3; Short=Inositol-triphosphate 5/6-kinase 3; Short=Ins(1,3,4)P(3) 5/6-kinase 3 && PF05770:Inositol 1, 3, 4-trisphosphate 5/6-kinase	-
Solyc10g085420.1.ITAG2.4	3972.3	5341.72	5772.35	585.255	619.986	1352.35	5028.79	852.532	2.56034	3.71e-16	3.82e-14	Solyc10g085420.1	SL2.50ch10	64612018	64613345	+	645	-	- && Q9LZX1.1 RecName: Full=Protein LURP-one-related 15 && PF04525:LURP-one-related	-
Solyc01g109880.2.ITAG2.4	493.502	457.477	430.342	1258.2	1152.96	973.011	460.44	1128.06	-1.29298	3.83e-16	3.94e-14	Solyc01g109880.2	SL2.50ch01	96724007	96725081	+	1075	-	- && Q9SI15.1 RecName: Full=bZIP transcription factor 2; Short=AtbZIP2; AltName: Full=G-box-binding factor 5; AltName: Full=Protein FLORAL TRANSITION AT THE MERISTEM 3 && PF00170:bZIP transcription factor	bZIP_1
Solyc02g069490.2.ITAG2.4	3090.22	3061.58	3023.57	8733.07	9335.69	6317.02	3058.45	8128.6	-1.41018	4.23e-16	4.33e-14	Solyc02g069490.2	SL2.50ch02	39357631	39359749	-	1950	-	- && Q39085.2 RecName: Full=Delta(24)-sterol reductase; AltName: Full=Cell elongation protein DIMINUTO; AltName: Full=Cell elongation protein Dwarf1; AltName: Full=Protein CABBAGE1; AltName: Full=Protein ENHANCED VERY-LOW-FLUENCE RESPONSE 1 && PF01565:FAD binding domain	FAD_binding_4
Solyc02g088180.2.ITAG2.4	587.734	764.877	638.061	52.4251	54.3848	147.914	663.557	84.9079	2.96568	4.68e-16	4.74e-14	Solyc02g088180.2	SL2.50ch02	50337248	50338778	+	1355	-	- && Q9FLJ2.1 RecName: Full=NAC domain-containing protein 100; Short=ANAC100; Short=AtNAC5 && PF02365:No apical meristem (NAM) protein	NAM
Solyc06g084170.2.ITAG2.4	81.6027	92.1164	134.132	7.62547	8.70156	12.0746	102.617	9.46721	3.44054	4.75e-16	4.79e-14	Solyc06g084170.2	SL2.50ch06	49380468	49381823	+	408	-	- && - && -	-
Solyc09g065660.2.ITAG2.4	69.9452	55.8908	35.3961	449.903	259.959	278.722	53.744	329.528	-2.61879	4.81e-16	4.83e-14	Solyc09g065660.2	SL2.50ch09	63876345	63878476	+	1405	-	- && Q6VBB2.1 RecName: Full=Heat stress transcription factor A-2b; AltName: Full=Heat stress transcription factor 18; Short=OsHsf-18; AltName: Full=Heat stress transcription factor 5; Short=rHsf5 && PF00447:HSF-type DNA-binding	HSF_DNA-bind
Solyc04g079400.2.ITAG2.4	918.03	689.32	922.161	233.53	170.768	287.778	843.171	230.692	1.86896	5.05e-16	5.04e-14	Solyc04g079400.2	SL2.50ch04	63910315	63915179	-	2485	-	- && Q9CAD5.1 RecName: Full=Mitogen-activated protein kinase kinase kinase YODA; AltName: Full=YODA MAPKK kinase && PF00069:Protein kinase domain	Pkinase
Solyc12g100060.1.ITAG2.4	3809.1	3749.86	4328.57	1700.48	1908.91	2008.41	3962.51	1872.6	1.08157	5.49e-16	5.46e-14	Solyc12g100060.1	SL2.50ch12	66947358	66947840	-	483	-	- && Q9LHJ8.1 RecName: Full=Zinc finger A20 and AN1 domain-containing stress-associated protein 5; Short=AtSAP5 && PF01428:AN1-like Zinc finger	zf-AN1
Solyc07g063170.1.ITAG2.4	324.468	320.855	347.44	1043.74	1163.83	761.705	330.921	989.759	-1.58018	5.63e-16	5.58e-14	Solyc07g063170.1	SL2.50ch07	65727036	65727542	+	507	-	- && - && -	-
Solyc02g085050.2.ITAG2.4	2539.4	2235.63	2460.96	995.124	1179.06	891.507	2412	1021.9	1.23942	6.54e-16	6.44e-14	Solyc02g085050.2	SL2.50ch02	48072082	48075438	-	1054	-	- && Q0DYB1.1 RecName: Full=Soluble inorganic pyrophosphatase; AltName: Full=Pyrophosphate phospho-hydrolase; Short=PPase >A2X8Q3.1 RecName: Full=Soluble inorganic pyrophosphatase; AltName: Full=Pyrophosphate phospho-hydrolase; Short=PPase && PF00719:Inorganic pyrophosphatase	Pyrophosphatase
Solyc04g051150.2.ITAG2.4	366.241	235.984	156.488	35.2678	21.7539	37.23	252.904	31.4172	3.00455	7.38e-16	7.24e-14	Solyc04g051150.2	SL2.50ch04	49732055	49747223	+	1960	-	- && Q9M8Z7.1 RecName: Full=Sterol 3-beta-glucosyltransferase UGT80A2; AltName: Full=UDP-glucose:sterol glucosyltransferase 80A2 && PF00201:UDP-glucoronosyl and UDP-glucosyl transferase|PF03033:Glycosyltransferase family 28 N-terminal domain	UDPGT
Solyc11g072710.1.ITAG2.4	285.609	160.427	310.181	48.6124	34.8063	44.2735	252.073	42.564	2.56409	8.73e-16	8.53e-14	Solyc11g072710.1	SL2.50ch11	55908596	55918351	+	3054	-	- && O48963.1 RecName: Full=Phototropin-1; AltName: Full=Non-phototropic hypocotyl protein 1; AltName: Full=Root phototropism protein 1 && PF00069:Protein kinase domain|PF13426:PAS domain	Pkinase
Solyc02g090470.2.ITAG2.4	797.569	1020.53	1038.6	289.768	380.693	353.182	952.23	341.214	1.48158	9.08e-16	8.83e-14	Solyc02g090470.2	SL2.50ch02	52008574	52010065	+	1130	-	- && Q9FX85.1 RecName: Full=Peroxidase 10; Short=Atperox P10; AltName: Full=ATP5a; Flags: Precursor && PF00141:Peroxidase	-
Solyc03g096550.2.ITAG2.4	2544.26	3525.26	3658.84	1000.84	1144.26	1274.88	3242.78	1139.99	1.50832	9.28e-16	8.99e-14	Solyc03g096550.2	SL2.50ch03	58703158	58704319	+	821	-	- && O65660.1 RecName: Full=PLAT domain-containing protein 1; Short=AtPLAT1; Short=PLAT domain protein 1; Flags: Precursor && PF01477:PLAT/LH2 domain	-
Solyc07g005520.1.ITAG2.4	639.221	813.522	739.592	244.015	246.907	310.921	730.778	267.281	1.45077	9.55e-16	9.21e-14	Solyc07g005520.1	SL2.50ch07	408207	409532	-	1326	-	- && Q9ZUH1.1 RecName: Full=BTB/POZ domain-containing protein At2g24240 && PF02214:BTB/POZ domain	K_tetra
Solyc07g054880.2.ITAG2.4	1544.62	1226.49	1812.65	437.512	580.829	511.158	1527.92	509.833	1.58432	9.91e-16	9.52e-14	Solyc07g054880.2	SL2.50ch07	63059126	63060350	+	1002	-	- && Q6RYA0.1 RecName: Full=Salicylic acid-binding protein 2; Short=NtSABP2; AltName: Full=Methyl salicylate esterase && PF12146:Serine aminopeptidase, S33	-
Solyc10g084880.2.ITAG2.4	503.217	1399.34	774.056	43.8465	63.0863	133.827	892.205	80.2532	3.47486	1.03e-15	9.85e-14	Solyc10g084880.2	SL2.50ch10	64255787	64257472	-	1686	-	- && - && PF11961:Domain of unknown function (DUF3475)|PF05003:Protein of unknown function (DUF668)	-
Solyc05g052670.1.ITAG2.4	108.804	107.642	195.61	18.1105	10.877	15.0932	137.352	14.6936	3.21851	1.04e-15	9.93e-14	Solyc05g052670.1	SL2.50ch05	62881105	62882490	-	1386	-	- && Q9FF86.1 RecName: Full=BAHD acyltransferase DCR; AltName: Full=Protein DEFECTIVE IN CUTICULAR RIDGES; AltName: Full=Protein PERMEABLE LEAVES 3 && PF02458:Transferase family	-
Solyc03g098730.1.ITAG2.4	599.391	794.892	1834.08	157.275	133.787	111.69	1076.12	134.251	3.00272	1.09e-15	1.03e-13	Solyc03g098730.1	SL2.50ch03	61007420	61008160	-	741	-	- && P13087.3 RecName: Full=Miraculin; Short=MIR; Flags: Precursor && PF00197:Trypsin and protease inhibitor	-
Solyc10g079620.1.ITAG2.4	129.204	154.217	140.653	474.686	353.501	496.064	141.358	441.417	-1.64419	1.15e-15	1.09e-13	Solyc10g079620.1	SL2.50ch10	61127346	61129939	+	888	-	- && Q4FPT7.1 RecName: Full=Phosphoglycolate phosphatase; Short=PGP; Short=PGPase && PF13419:Haloacid dehalogenase-like hydrolase	-
Solyc09g011160.2.ITAG2.4	19.4292	16.5603	15.8351	177.292	127.26	94.5843	17.2748	133.046	-2.94642	1.22e-15	1.14e-13	Solyc09g011160.2	SL2.50ch09	4509244	4514595	+	1625	-	- && Q9FN03.1 RecName: Full=Ultraviolet-B receptor UVR8; AltName: Full=Protein UV-B RESISTANCE 8; AltName: Full=RCC1 domain-containing protein UVR8 && PF00415:Regulator of chromosome condensation (RCC1) repeat	-
Solyc12g009650.1.ITAG2.4	1068.61	988.44	720.962	318.364	206.662	263.629	926.003	262.885	1.81504	1.37e-15	1.28e-13	Solyc12g009650.1	SL2.50ch12	2922153	2923552	-	798	-	- && Q00451.1 RecName: Full=36.4 kDa proline-rich protein && PF14547:Hydrophobic seed protein	-
Solyc12g015880.1.ITAG2.4	9910.84	9148.5	10088.8	24618.8	28909.9	19872.8	9716.05	24467.2	-1.33238	1.38e-15	1.28e-13	Solyc12g015880.1	SL2.50ch12	5868004	5871038	-	2100	-	- && P36181.1 RecName: Full=Heat shock cognate protein 80 && PF02518:Histidine kinase-, DNA gyrase B-, and HSP90-like ATPase|PF00183:Hsp90 protein	HATPase_c
Solyc07g005300.1.ITAG2.4	293.381	254.614	238.458	50.5188	68.5248	83.5159	262.151	67.5198	1.95908	1.55e-15	1.43e-13	Solyc07g005300.1	SL2.50ch07	235320	235478	-	159	-	- && - && -	-
Solyc02g080640.2.ITAG2.4	290.467	662.41	863.478	3518.2	3383.82	3978.58	605.452	3626.87	-2.58253	1.57e-15	1.45e-13	Solyc02g080640.2	SL2.50ch02	44828450	44831959	+	1743	-	- && P92979.2 RecName: Full=5'-adenylylsulfate reductase 1, chloroplastic; AltName: Full=3'-phosphoadenosine-5'-phosphosulfate reductase homolog 19; Short=PAPS reductase homolog 19; Short=Prh-19; AltName: Full=Adenosine 5'-phosphosulfate 5'-adenylylsulfate sulfotransferase 1; Short=APS sulfotransferase 1; AltName: Full=Thioredoxin-independent APS reductase 1; Flags: Precursor && PF00085:Thioredox…	-
Solyc12g008500.1.ITAG2.4	955.917	1147.83	1004.13	259.266	222.978	393.43	1035.96	291.891	1.82681	1.94e-15	1.78e-13	Solyc12g008500.1	SL2.50ch12	1915241	1918466	+	3027	-	- && P47735.1 RecName: Full=Receptor-like protein kinase 5; AltName: Full=Protein HAESA; Flags: Precursor && PF00069:Protein kinase domain	Pkinase
Solyc09g007920.2.ITAG2.4	10868.7	15026.4	13522.2	4547.64	2986.81	4664.82	13139.1	4066.42	1.69192	2.08e-15	1.9e-13	Solyc09g007920.2	SL2.50ch09	1435451	1440492	+	2439	-	- && P26600.1 RecName: Full=Phenylalanine ammonia-lyase; Short=PAL && PF00221:Aromatic amino acid lyase	-
Solyc03g026070.2.ITAG2.4	200.121	231.844	181.638	577.63	613.46	483.99	204.534	558.36	-1.44981	2.16e-15	1.96e-13	Solyc03g026070.2	SL2.50ch03	3475636	3480091	-	2697	-	- && Q6EPF0.1 RecName: Full=Homeobox-leucine zipper protein ROC5; AltName: Full=GLABRA 2-like homeobox protein 5; AltName: Full=HD-ZIP protein ROC5; AltName: Full=Homeodomain transcription factor ROC5; AltName: Full=Protein RICE OUTERMOST CELL-SPECIFIC 5 && PF00046:Homeobox domain|PF01852:START domain	START
Solyc04g079460.1.ITAG2.4	271.038	189.408	179.775	11.4382	6.52617	33.2051	213.407	17.0565	3.64035	2.9e-15	2.63e-13	Solyc04g079460.1	SL2.50ch04	63947195	63947647	-	453	-	- && Q9S7T8.1 RecName: Full=Serpin-ZX; AltName: Full=ArathZx; AltName: Full=AtSerpin1; AltName: Full=Serpin-1 && PF00079:Serpin (serine protease inhibitor)	Serpin
Solyc05g007150.2.ITAG2.4	529.446	506.123	651.101	1287.75	1356.36	1241.67	562.223	1295.26	-1.2033	3.05e-15	2.75e-13	Solyc05g007150.2	SL2.50ch05	1746851	1751800	+	1291	-	- && Q9M9S6.1 RecName: Full=UDP-galactose/UDP-glucose transporter 3; Short=AtUTr3 && PF08449:UAA transporter family	-
Solyc09g089680.2.ITAG2.4	2324.71	2198.37	1791.23	756.828	740.721	951.88	2104.77	816.476	1.36599	3.17e-15	2.85e-13	Solyc09g089680.2	SL2.50ch09	69440018	69442837	+	1320	-	- && P10967.1 RecName: Full=1-aminocyclopropane-1-carboxylate oxidase homolog; AltName: Full=Protein E8 && PF14226:non-haem dioxygenase in morphine synthesis N-terminal|PF03171:2OG-Fe(II) oxygenase superfamily	2OG-FeII_Oxy
Solyc03g119340.2.ITAG2.4	436.186	426.426	505.791	87.693	43.5078	117.727	456.135	82.976	2.45564	3.22e-15	2.87e-13	Solyc03g119340.2	SL2.50ch03	67984033	67987161	+	1676	-	- && Q8GYA4.3 RecName: Full=Cysteine-rich receptor-like protein kinase 10; Short=Cysteine-rich RLK10; AltName: Full=Receptor-like protein kinase 4; Flags: Precursor && PF07714:Protein tyrosine kinase	Pkinase_Tyr
Solyc02g088390.2.ITAG2.4	1671.88	1508.02	1395.35	3176.96	3061.86	2926.08	1525.08	3054.97	-1.00237	3.33e-15	2.96e-13	Solyc02g088390.2	SL2.50ch02	50485078	50487875	-	816	-	- && Q39131.1 RecName: Full=Lamin-like protein; Flags: Precursor && PF02298:Plastocyanin-like domain	Cu_bind_like
Solyc03g123860.2.ITAG2.4	1078.32	1050.54	450.834	142.978	96.8049	164.013	859.899	134.599	2.67419	3.49e-15	3.09e-13	Solyc03g123860.2	SL2.50ch03	70551364	70554963	+	3507	-	- && P93194.2 RecName: Full=Receptor-like protein kinase; Flags: Precursor && PF13855:Leucine rich repeat|PF00069:Protein kinase domain|PF08263:Leucine rich repeat N-terminal domain	Pkinase
Solyc12g087950.1.ITAG2.4	239.951	269.104	300.867	51.472	69.6125	87.5408	269.974	69.5417	1.95903	4.38e-15	3.85e-13	Solyc12g087950.1	SL2.50ch12	63451830	63452630	-	801	-	- && Q9LTA2.1 RecName: Full=AT-hook motif nuclear-localized protein 17 && PF03479:Domain of unknown function (DUF296)	-
Solyc04g077670.2.ITAG2.4	451.729	380.886	406.123	841.662	918.015	910.625	412.913	890.101	-1.10759	4.44e-15	3.89e-13	Solyc04g077670.2	SL2.50ch04	62603103	62610325	+	1655	-	- && Q9C7Z9.2 RecName: Full=Serine carboxypeptidase-like 18; Flags: Precursor && PF00450:Serine carboxypeptidase	Peptidase_S10
Solyc07g043460.2.ITAG2.4	1915.72	1677.76	1965.41	5217.73	5732.15	3869.91	1852.96	4939.93	-1.41452	5.08e-15	4.42e-13	Solyc07g043460.2	SL2.50ch07	57246995	57249114	+	1812	-	- && Q05047.1 RecName: Full=Secologanin synthase; Short=SLS; AltName: Full=CYPLXXII; AltName: Full=Cytochrome P450 72A1 && PF00067:Cytochrome P450	p450
Solyc01g102290.2.ITAG2.4	5674.3	6964.62	6904.1	2798.55	3235.89	3059.9	6514.34	3031.45	1.10371	5.12e-15	4.44e-13	Solyc01g102290.2	SL2.50ch01	91102511	91103406	-	595	-	- && Q8H5T6.1 RecName: Full=Hydrophobic protein LTI6A; AltName: Full=Low temperature-induced protein 6A && -	-
Solyc03g115410.2.ITAG2.4	829.627	803.172	869.998	292.628	253.433	376.325	834.266	307.462	1.43949	5.22e-15	4.51e-13	Solyc03g115410.2	SL2.50ch03	65133863	65139337	+	1332	-	- && B9F655.1 RecName: Full=Plant intracellular Ras-group-related LRR protein 7; AltName: Full=Intracellular Ras-group-related LRR protein 7; Short=OsIRL7 && PF13855:Leucine rich repeat	-
Solyc02g093860.2.ITAG2.4	3337.94	4267.37	4156.24	1877.77	1715.3	1748.8	3920.52	1780.62	1.13853	5.27e-15	4.53e-13	Solyc02g093860.2	SL2.50ch02	54561545	54564587	+	1612	-	- && Q9FKS8.1 RecName: Full=Lysine histidine transporter 1 && PF01490:Transmembrane amino acid transporter protein	Aa_trans
Solyc02g079170.2.ITAG2.4	256.466	276.349	249.635	592.881	593.882	542.35	260.817	576.371	-1.14452	5.28e-15	4.53e-13	Solyc02g079170.2	SL2.50ch02	43782210	43787819	+	2067	-	- && Q94BV7.1 RecName: Full=External alternative NAD(P)H-ubiquinone oxidoreductase B2, mitochondrial; AltName: Full=External alternative NADH dehydrogenase NDB2; AltName: Full=NADH:ubiquinone reductase (non-electrogenic) NDB2; Flags: Precursor && PF07992:Pyridine nucleotide-disulphide oxidoreductase|PF00036:EF hand	Pyr_redox_2
Solyc07g018290.2.ITAG2.4	207.893	188.373	253.361	61.957	57.6479	64.3978	216.542	61.3342	1.81997	5.34e-15	4.56e-13	Solyc07g018290.2	SL2.50ch07	10023972	10028265	-	1511	-	- && Q6PQQ3.2 RecName: Full=AP2-like ethylene-responsive transcription factor AIL5; AltName: Full=Protein AINTEGUMENTA-LIKE 5 && PF00847:AP2 domain	AP2
Solyc01g109720.2.ITAG2.4	221.493	234.949	241.252	78.1611	56.5602	77.4786	232.565	70.7333	1.71354	5.99e-15	5.08e-13	Solyc01g109720.2	SL2.50ch01	96604848	96606949	-	1317	-	- && - && PF00561:alpha/beta hydrolase fold	Abhydrolase_1
Solyc10g079820.1.ITAG2.4	8820.86	10114.2	9696.66	4265.5	4215.91	5122.64	9543.9	4534.68	1.07355	6.04e-15	5.1e-13	Solyc10g079820.1	SL2.50ch10	61312127	61312908	+	471	-	- && Q39096.1 RecName: Full=Protein EARLY RESPONSIVE TO DEHYDRATION 15; AltName: Full=PAM2-containing protein CID1; AltName: Full=Polyadenylate-binding protein-interacting protein 1; Short=PABP-interacting protein 1; Short=Poly(A)-binding protein-interacting protein 1; AltName: Full=Protein CTC-INTERACTING DOMAIN 1; AltName: Full=Protein LIGHT STRESS-REGULATED 1 && PF07145:Ataxin-2 C-terminal reg…	PAM2
Solyc01g073810.2.ITAG2.4	2857.07	3463.16	3946.66	1078.05	910.401	1397.63	3422.3	1128.7	1.60015	6.14e-15	5.17e-13	Solyc01g073810.2	SL2.50ch01	81170011	81170807	-	797	-	- && - && PF07649:C1-like domain	C1_3
Solyc03g083710.1.ITAG2.4	309.896	296.014	269.196	625.289	654.793	618.823	291.702	632.968	-1.11787	6.34e-15	5.31e-13	Solyc03g083710.1	SL2.50ch03	53652491	53653078	-	588	-	- && - && PF04043:Plant invertase/pectin methylesterase inhibitor	-
Solyc07g006230.1.ITAG2.4	3749.84	3738.48	2868.94	7516.81	7678.04	8298.26	3452.42	7831.04	-1.18169	6.44e-15	5.38e-13	Solyc07g006230.1	SL2.50ch07	1047308	1047703	-	396	-	- && - && -	-
Solyc05g050360.2.ITAG2.4	148.633	200.793	130.407	28.5955	35.8939	32.1989	159.944	32.2295	2.3127	6.87e-15	5.72e-13	Solyc05g050360.2	SL2.50ch05	60469964	60475367	+	2345	-	- && Q9SKD7.2 RecName: Full=Probable cyclic nucleotide-gated ion channel 3; Short=AtCNGC3; AltName: Full=Cyclic nucleotide- and calmodulin-regulated ion channel 3 && PF00027:Cyclic nucleotide-binding domain|PF00520:Ion transport protein	Ion_trans
Solyc09g007630.2.ITAG2.4	785.912	753.491	661.348	1613.74	1638.07	1428.83	733.584	1560.21	-1.08892	7.21e-15	5.98e-13	Solyc09g007630.2	SL2.50ch09	1202699	1207893	+	1750	-	- && Q9LYW9.1 RecName: Full=DnaJ protein P58IPK homolog; Short=AtP58IPK; AltName: Full=Chaperone protein dnaJ 36; Short=AtDjA36; Short=AtJ36; Flags: Precursor && PF13414:TPR repeat|PF00226:DnaJ domain	DnaJ
Solyc05g008150.2.ITAG2.4	102.975	91.0814	82.9013	672.948	473.147	293.815	92.3192	479.97	-2.37884	8.09e-15	6.69e-13	Solyc05g008150.2	SL2.50ch05	2552199	2553338	+	461	-	- && P14903.1 RecName: Full=Fruit-specific protein && -	-
Solyc02g085880.1.ITAG2.4	96.1746	72.4511	26.0813	577.63	388.307	584.611	64.9023	516.849	-2.99569	8.53e-15	7.02e-13	Solyc02g085880.1	SL2.50ch02	48668099	48670133	+	1491	-	- && Q9ZW95.1 RecName: Full=Cytokinin hydroxylase; AltName: Full=Cytochrome P450 35A2 && PF00067:Cytochrome P450	p450
Solyc12g096710.1.ITAG2.4	369.155	437.812	429.41	37.1742	28.2801	94.5843	412.126	53.3462	2.94787	9.33e-15	7.65e-13	Solyc12g096710.1	SL2.50ch12	65518647	65522660	+	2424	-	- && O04567.1 RecName: Full=Probable inactive receptor kinase At1g27190; Flags: Precursor && PF07714:Protein tyrosine kinase	Pkinase_Tyr
Solyc04g081700.2.ITAG2.4	118.518	109.712	153.693	0	0	0	127.308	0	9.41543	9.81e-15	7.99e-13	Solyc04g081700.2	SL2.50ch04	65632082	65635947	+	382	-	- && - && -	-
Solyc05g056540.2.ITAG2.4	4299.69	4356.38	4049.12	2033.14	1812.1	2289.14	4235.06	2044.79	1.05024	1.06e-14	8.6e-13	Solyc05g056540.2	SL2.50ch05	65805847	65810833	-	1636	-	- && A4YGN0.1 RecName: Full=Succinate-semialdehyde dehydrogenase (acetylating) && PF08240:Alcohol dehydrogenase GroES-like domain|PF00107:Zinc-binding dehydrogenase	ADH_zinc_N
Solyc03g121360.1.ITAG2.4	2843.47	4530.26	3731.49	1178.14	1264.99	1425.81	3701.74	1289.64	1.52121	1.19e-14	9.63e-13	Solyc03g121360.1	SL2.50ch03	69474092	69474703	+	612	-	- && Q8LE58.1 RecName: Full=ESCRT-related protein CHMP1A; AltName: Full=Protein CHARGED MULTIVESICULAR BODY PROTEIN 1A; AltName: Full=Protein CHROMATIN MODIFYING PROTEIN 1A; AltName: Full=Vacuolar protein-sorting-associated protein 46.1 && PF03357:Snf7	ESCRT-III
Solyc01g098590.2.ITAG2.4	47.6016	179.058	204.925	0	3.26309	3.01865	143.861	2.09391	6.13602	1.22e-14	9.84e-13	Solyc01g098590.2	SL2.50ch01	89070927	89072248	+	1144	-	- && Q9MAA2.1 RecName: Full=Phosphoglycerate mutase-like protein AT74; Short=At-74 && PF00300:Histidine phosphatase superfamily (branch 1)	-
Solyc02g083280.2.ITAG2.4	392.47	334.31	622.226	81.0207	89.191	119.74	449.669	96.6505	2.21881	1.39e-14	1.11e-12	Solyc02g083280.2	SL2.50ch02	46727836	46730554	+	928	-	- && Q38853.1 RecName: Full=Rhodanese-like domain-containing protein 15, chloroplastic; AltName: Full=Protein DARK INDUCIBLE 1; AltName: Full=Senescence-associated protein 1; Short=AtSEN1; AltName: Full=Sulfurtransferase 15; Short=AtStr15; Flags: Precursor && PF00581:Rhodanese-like domain	Rhodanese
Solyc04g079320.2.ITAG2.4	637.278	639.64	530.941	251.641	228.416	268.66	602.62	249.572	1.27075	1.44e-14	1.15e-12	Solyc04g079320.2	SL2.50ch04	63828597	63843787	+	1253	-	- && O48721.2 RecName: Full=Uroporphyrinogen-III synthase, chloroplastic; Short=AtUROS; AltName: Full=Hydroxymethylbilane hydrolyase [cyclizing]; AltName: Full=Uroporphyrinogen-III cosynthase; Flags: Precursor && PF02602:Uroporphyrinogen-III synthase HemD	HEM4
Solyc12g087830.1.ITAG2.4	65.0879	153.182	95.0105	0	6.52617	3.01865	104.427	3.18161	5.08153	1.52e-14	1.21e-12	Solyc12g087830.1	SL2.50ch12	63325365	63336973	+	597	-	- && Q9FPN7.2 RecName: Full=Agamous-like MADS-box protein AGL31; AltName: Full=Protein MADS AFFECTING FLOWERING 2 && PF00319:SRF-type transcription factor (DNA-binding and dimerisation domain)|PF01486:K-box region	SRF-TF
Solyc01g091260.2.ITAG2.4	31.0867	43.4707	18.6295	182.058	189.259	147.914	31.0623	173.077	-2.48524	1.69e-14	1.34e-12	Solyc01g091260.2	SL2.50ch01	84921384	84925538	-	1020	-	- && - && PF10248:Myelodysplasia-myeloid leukemia factor 1-interacting protein	-
Solyc03g083960.2.ITAG2.4	902.487	683.11	986.433	225.905	113.12	232.436	857.343	190.487	2.16856	1.72e-14	1.36e-12	Solyc03g083960.2	SL2.50ch03	53896143	53898914	-	1386	-	- && O64896.1 RecName: Full=Trehalose-phosphate phosphatase A; Short=AtTPPA; AltName: Full=Trehalose 6-phosphate phosphatase && PF02358:Trehalose-phosphatase	-
Solyc01g096140.2.ITAG2.4	16.5148	17.5953	13.9721	98.178	91.3664	91.5656	16.0274	93.7033	-2.55123	1.86e-14	1.46e-12	Solyc01g096140.2	SL2.50ch01	87252712	87255084	+	1871	-	- && O23086.2 RecName: Full=Aluminum-activated malate transporter 10; Short=AtALMT10 && PF11744:Aluminium activated malate transporter	-
Solyc01g080150.2.ITAG2.4	88.4029	105.572	114.571	413.682	278.45	345.132	102.849	345.755	-1.74995	1.91e-14	1.5e-12	Solyc01g080150.2	SL2.50ch01	79327671	79329424	+	1506	-	- && Q94ID2.2 RecName: Full=Adenylate isopentenyltransferase 5, chloroplastic; Short=AtIPT5; AltName: Full=Adenylate dimethylallyltransferase 5; AltName: Full=Cytokinin synthase 5; Flags: Precursor && PF01715:IPP transferase	IPPT
Solyc08g077680.2.ITAG2.4	2772.55	2385.71	2229.95	1140.01	1139.9	1244.69	2462.74	1174.87	1.06772	2.21e-14	1.72e-12	Solyc08g077680.2	SL2.50ch08	61584403	61588684	-	2266	-	- && F4KEW8.1 RecName: Full=Protein NETWORKED 4A && PF07765:KIP1-like protein	-
Solyc05g052760.2.ITAG2.4	2641.4	2717.95	2387.37	1239.14	1089.87	1353.36	2582.24	1227.46	1.07261	2.23e-14	1.73e-12	Solyc05g052760.2	SL2.50ch05	62953346	62958339	+	2091	-	- && Q39033.1 RecName: Full=Phosphoinositide phospholipase C 2; AltName: Full=Phosphoinositide phospholipase PLC2; Short=AtPLC2; Short=PI-PLC2 && PF00388:Phosphatidylinositol-specific phospholipase C, X domain|PF09279:Phosphoinositide-specific phospholipase C, efhand-like|PF00387:Phosphatidylinositol-specific phospholipase C, Y domain|PF00168:C2 domain	PI-PLC-X
Solyc04g057790.1.ITAG2.4	142.805	135.587	150.899	36.221	41.3324	32.1989	143.097	36.5841	1.97063	2.34e-14	1.81e-12	Solyc04g057790.1	SL2.50ch04	54917357	54917980	-	387	-	- && - && PF05699:hAT family C-terminal dimerisation region	hATC
Solyc07g042540.2.ITAG2.4	118.518	79.6962	81.9699	0.953184	0	3.01865	93.3948	1.32394	6.11478	2.51e-14	1.93e-12	Solyc07g042540.2	SL2.50ch07	55894703	55895633	-	527	-	- && - && -	-
Solyc05g041200.2.ITAG2.4	128.233	86.9413	98.7364	12.3914	18.4908	16.0995	104.637	15.6606	2.74731	2.54e-14	1.95e-12	Solyc05g041200.2	SL2.50ch05	50252006	50256524	-	1732	-	- && O23920.1 RecName: Full=4-hydroxyphenylpyruvate dioxygenase; AltName: Full=4-hydroxyphenylpyruvic acid oxidase; Short=4HPPD; Short=HPD; Short=HPPDase && -	-
Solyc09g075420.2.ITAG2.4	1410.56	2706.57	2326.83	418.448	519.918	649.009	2147.98	529.125	2.02141	2.71e-14	2.07e-12	Solyc09g075420.2	SL2.50ch09	67127407	67128628	+	1148	-	- && O22259.1 RecName: Full=Ethylene-responsive transcription factor ERF071 && PF00847:AP2 domain	AP2
Solyc07g063940.1.ITAG2.4	762.597	1268.93	2783.25	164.901	184.908	249.541	1604.92	199.784	3.00618	3.48e-14	2.65e-12	Solyc07g063940.1	SL2.50ch07	66264913	66266664	-	1752	-	- && Q69VG1.1 RecName: Full=Chitin-inducible gibberellin-responsive protein 1 && PF03514:GRAS domain family	GRAS
Solyc10g079770.1.ITAG2.4	1497.99	2212.86	2104.2	539.502	451.394	733.531	1938.35	574.809	1.75334	3.84e-14	2.92e-12	Solyc10g079770.1	SL2.50ch10	61271562	61274007	-	1338	-	- && Q9LZA6.1 RecName: Full=Triacylglycerol lipase SDP1; AltName: Full=Protein SUGAR-DEPENDENT 1 && -	-
Solyc02g090450.2.ITAG2.4	1051.12	1149.9	1073.99	271.658	431.815	421.604	1091.67	375.026	1.54254	3.96e-14	3e-12	Solyc02g090450.2	SL2.50ch02	52000059	52001628	+	1253	-	- && Q9FX85.1 RecName: Full=Peroxidase 10; Short=Atperox P10; AltName: Full=ATP5a; Flags: Precursor && PF00141:Peroxidase	-
Solyc07g062100.2.ITAG2.4	136.005	154.217	140.653	437.512	457.92	332.051	143.625	409.161	-1.51069	4.12e-14	3.11e-12	Solyc07g062100.2	SL2.50ch07	64914154	64915635	-	1191	-	- && P55201.2 RecName: Full=Peregrin; AltName: Full=Bromodomain and PHD finger-containing protein 1; AltName: Full=Protein Br140 && PF00628:PHD-finger|PF13832:PHD-zinc-finger like domain	PHD
Solyc04g072020.2.ITAG2.4	4262.77	4958.76	3012.39	1237.23	1176.89	1552.59	4077.97	1322.24	1.62473	4.42e-14	3.31e-12	Solyc04g072020.2	SL2.50ch04	59093689	59096745	+	1353	-	- && Q9M9H6.1 RecName: Full=Probable choline kinase 1; Short=AtCK1 && PF01633:Choline/ethanolamine kinase	Choline_kinase
Solyc05g056040.2.ITAG2.4	1594.17	1473.86	1825.69	614.804	611.285	790.886	1631.24	672.325	1.2788	4.6e-14	3.43e-12	Solyc05g056040.2	SL2.50ch05	65422556	65428132	-	2280	-	- && Q9ZPY6.3 RecName: Full=Auxin response factor 11 && PF06507:Auxin response factor|PF02362:B3 DNA binding domain	B3
Solyc02g090630.2.ITAG2.4	1571.82	2103.15	1390.69	600.506	588.443	675.171	1688.56	621.373	1.44194	4.63e-14	3.44e-12	Solyc02g090630.2	SL2.50ch02	52178986	52181656	+	1374	-	- && O48723.1 RecName: Full=Patatin-like protein 2; Short=AtPLP2; AltName: Full=Patatin-related phospholipase A IIalpha; Short=pPLAIIa; AltName: Full=Phospholipase A IIA; Short=AtPLAIIA && PF01734:Patatin-like phospholipase	-
Solyc03g082690.2.ITAG2.4	620.763	749.351	434.068	172.526	118.559	175.082	601.394	155.389	1.95043	4.68e-14	3.47e-12	Solyc03g082690.2	SL2.50ch03	52612130	52616934	+	3298	-	- && Q9LM76.1 RecName: Full=U-box domain-containing protein 44; AltName: Full=Plant U-box protein 44; AltName: Full=Protein SENESCENCE-ASSOCIATED E3 UBIQUITIN LIGASE 1 && PF04564:U-box domain	U-box
Solyc11g066670.1.ITAG2.4	244.808	200.793	222.623	748.25	659.143	507.133	222.741	638.175	-1.51832	4.81e-14	3.56e-12	Solyc11g066670.1	SL2.50ch11	52443508	52444911	+	1404	-	- && P56725.1 RecName: Full=Zeatin O-xylosyltransferase; AltName: Full=Zeatin O-beta-D-xylosyltransferase && PF00201:UDP-glucoronosyl and UDP-glucosyl transferase	UDPGT
Solyc10g050060.1.ITAG2.4	2406.31	2163.18	3214.52	874.07	769.001	1054.51	2594.67	899.195	1.52879	4.9e-14	3.61e-12	Solyc10g050060.1	SL2.50ch10	47684241	47686246	-	753	-	- && Q8K0T7.3 RecName: Full=Protein unc-13 homolog C; AltName: Full=Munc13-3 && PF00168:C2 domain	C2
Solyc06g033920.1.ITAG2.4	164.177	134.552	92.2161	9.53184	9.78926	23.143	130.315	14.1547	3.20075	4.99e-14	3.65e-12	Solyc06g033920.1	SL2.50ch06	23417981	23420881	+	2901	-	- && - && PF08263:Leucine rich repeat N-terminal domain|PF13855:Leucine rich repeat	LRRNT_2
Solyc06g007190.2.ITAG2.4	636.307	1433.5	1059.09	68.6293	87.0156	212.312	1042.96	122.652	3.08795	6.06e-14	4.39e-12	Solyc06g007190.2	SL2.50ch06	1265654	1267702	+	1598	-	- && O80871.1 RecName: Full=Probable protein phosphatase 2C 25; Short=AtPP2C25; AltName: Full=Protein phosphatase AP2C1 && PF00481:Protein phosphatase 2C	PP2C
Solyc06g066590.2.ITAG2.4	941.345	959.46	1242.59	461.341	416.587	382.362	1047.8	420.097	1.31854	6.16e-14	4.45e-12	Solyc06g066590.2	SL2.50ch06	41833779	41840728	-	817	-	- && Q9M815.2 RecName: Full=Protein PLANT CADMIUM RESISTANCE 8; Short=AtPCR8 && PF04749:PLAC8 family	-
Solyc02g062730.2.ITAG2.4	93.2602	100.397	121.092	0	0	0	104.916	0	9.13598	6.32e-14	4.53e-12	Solyc02g062730.2	SL2.50ch02	34495529	34496703	+	621	-	- && - && -	-
Solyc02g079220.2.ITAG2.4	7399.62	9544.91	8322.73	3836.57	3774.3	4284.47	8422.42	3965.11	1.08682	6.33e-14	4.53e-12	Solyc02g079220.2	SL2.50ch02	43831629	43835183	+	1925	-	- && Q41144.1 RecName: Full=Sugar carrier protein C && PF00083:Sugar (and other) transporter	Sugar_tr
Solyc11g020670.1.ITAG2.4	2998.9	2727.27	2469.34	1129.52	858.192	1244.69	2731.84	1077.47	1.34183	6.56e-14	4.68e-12	Solyc11g020670.1	SL2.50ch11	11820759	11821883	-	1125	-	- && Q9C7G4.1 RecName: Full=Transcription factor TCP22 && PF03634:TCP family transcription factor	TCP
Solyc07g005020.2.ITAG2.4	1230.84	1070.21	1086.1	2590.75	2990.07	2209.65	1129.05	2596.83	-1.20148	7.03e-14	5e-12	Solyc07g005020.2	SL2.50ch07	46570	52388	-	2518	-	- && O80786.1 RecName: Full=DNA replication licensing factor MCM5; AltName: Full=Minichromosome maintenance protein 5; Short=AtMCM5 && PF00493:MCM2/3/5 family|PF14551:MCM N-terminal domain	MCM
Solyc02g070020.1.ITAG2.4	411.899	337.415	316.702	41.9401	38.0693	97.6029	355.339	59.2041	2.58427	7.6e-14	5.37e-12	Solyc02g070020.1	SL2.50ch02	39809861	39811300	-	1440	-	- && Q9LTA3.1 RecName: Full=UDP-glycosyltransferase 91C1 && PF00201:UDP-glucoronosyl and UDP-glucosyl transferase	UDPGT
Solyc03g007210.2.ITAG2.4	1762.23	1941.69	1748.38	724.42	605.846	885.47	1817.43	738.579	1.29861	8.52e-14	6e-12	Solyc03g007210.2	SL2.50ch03	1779466	1782208	+	1661	-	- && P93604.1 RecName: Full=Rust resistance kinase Lr10; AltName: Full=Probable receptor-like serine/threonine-protein kinase LRK10; Flags: Precursor && PF00069:Protein kinase domain|PF14380:Wall-associated receptor kinase C-terminal	Pkinase
Solyc12g006640.1.ITAG2.4	91.3173	123.167	95.942	323.129	299.116	274.697	103.475	298.981	-1.53309	8.58e-14	6.03e-12	Solyc12g006640.1	SL2.50ch12	1110621	1111983	-	498	-	- && - && PF00903:Glyoxalase/Bleomycin resistance protein/Dioxygenase superfamily	Glyoxalase
Solyc03g118410.2.ITAG2.4	292.41	289.804	358.618	103.897	123.997	109.678	313.611	112.524	1.48106	8.62e-14	6.03e-12	Solyc03g118410.2	SL2.50ch03	67294852	67296535	-	721	-	- && P07854.2 RecName: Full=Acyl carrier protein 1, chloroplastic; Short=ACP I; Short=Acyl carrier protein I; Flags: Precursor && PF00550:Phosphopantetheine attachment site	PP-binding
Solyc04g071120.2.ITAG2.4	1063.75	1233.74	992.953	352.678	274.099	459.841	1096.81	362.206	1.59757	1.13e-13	7.89e-12	Solyc04g071120.2	SL2.50ch04	58025598	58039044	-	2081	-	- && F4JTP5.1 RecName: Full=Serine/threonine-protein kinase STY46; AltName: Full=Serine/threonine/tyrosine-protein kinase 46 && PF07714:Protein tyrosine kinase	Pkinase_Tyr
Solyc02g091000.2.ITAG2.4	351.669	338.45	341.852	765.407	797.281	657.059	343.99	739.916	-1.10474	1.14e-13	7.9e-12	Solyc02g091000.2	SL2.50ch02	52447538	52449427	-	1226	-	- && - && PF03168:Late embryogenesis abundant protein	-
Solyc00g011890.2.ITAG2.4	1058.89	1051.58	1039.53	494.703	455.744	567.506	1050	505.984	1.05277	1.15e-13	7.95e-12	Solyc00g011890.2	SL2.50ch00	10333916	10350566	-	3282	-	- && O23461.1 RecName: Full=L-arabinokinase; Short=AtISA1 && PF00288:GHMP kinases N terminal domain|PF13528:Glycosyl transferase family 1|PF10509:Galactokinase galactose-binding signature	GHMP_kinases
Solyc11g040140.1.ITAG2.4	503.217	542.348	322.291	1661.4	1754.45	1220.54	455.952	1545.46	-1.76164	1.21e-13	8.32e-12	Solyc11g040140.1	SL2.50ch11	39807936	39810801	-	903	-	- && Q39857.2 RecName: Full=Xyloglucan endotransglucosylase/hydrolase 1; Flags: Precursor && PF06955:Xyloglucan endo-transglycosylase (XET) C-terminus|PF00722:Glycosyl hydrolases family 16	-
Solyc11g012700.1.ITAG2.4	92.2888	89.0113	90.3531	228.764	247.995	243.504	90.5511	240.088	-1.40612	1.23e-13	8.47e-12	Solyc11g012700.1	SL2.50ch11	5469691	5473409	+	2268	-	- && O23482.3 RecName: Full=Oligopeptide transporter 3; Short=AtOPT3 && PF03169:OPT oligopeptide transporter protein	OPT
Solyc02g065190.2.ITAG2.4	321.553	411.936	278.511	111.523	68.5248	90.5594	337.334	90.2023	1.89894	1.26e-13	8.64e-12	Solyc02g065190.2	SL2.50ch02	36351922	36354372	-	1730	-	- && Q8VWZ7.1 RecName: Full=Geraniol 8-hydroxylase; AltName: Full=Cytochrome P450 76B6; AltName: Full=Geraniol 10-hydroxylase; Short=CrG10H && PF00067:Cytochrome P450	p450
Solyc01g105410.2.ITAG2.4	3798.41	5931.67	4626.64	1386.88	985.452	1729.68	4785.58	1367.34	1.80709	1.28e-13	8.76e-12	Solyc01g105410.2	SL2.50ch01	93587661	93588898	+	1238	-	- && Q9FE06.1 RecName: Full=Protein EXORDIUM-like 2; Flags: Precursor && PF04674:Phosphate-induced protein 1 conserved region	-
Solyc02g085310.2.ITAG2.4	1210.44	1513.19	1098.21	543.315	464.446	544.363	1273.95	517.375	1.29927	1.29e-13	8.78e-12	Solyc02g085310.2	SL2.50ch02	48242155	48243430	-	708	-	- && - && -	-
Solyc01g108050.2.ITAG2.4	188.463	131.447	196.541	45.7528	40.2447	37.23	172.151	41.0759	2.06715	1.32e-13	8.99e-12	Solyc01g108050.2	SL2.50ch01	95431005	95432481	+	532	-	- && Q8S944.2 RecName: Full=Dynamin-related protein 3A; AltName: Full=Dynamin-like protein 2; AltName: Full=Dynamin-like protein 2a && -	-
Solyc01g006950.2.ITAG2.4	986.033	1753.32	2198.28	341.24	301.292	455.816	1645.88	366.116	2.1683	1.42e-13	9.56e-12	Solyc01g006950.2	SL2.50ch01	1516340	1518150	-	1041	-	- && Q9ZSD4.1 RecName: Full=Syntaxin-121; Short=AtSYP121; AltName: Full=Syntaxin-related protein At-Syr1 && PF00804:Syntaxin|PF05739:SNARE domain	SNARE
Solyc06g076660.2.ITAG2.4	1254.16	1076.42	1329.22	3116.91	3824.34	2563.84	1219.93	3168.36	-1.37666	1.43e-13	9.57e-12	Solyc06g076660.2	SL2.50ch06	47610868	47612582	-	1135	-	- && O82797.1 RecName: Full=Proliferating cell nuclear antigen; Short=PCNA && PF00705:Proliferating cell nuclear antigen, N-terminal domain|PF02747:Proliferating cell nuclear antigen, C-terminal domain	PCNA_C
Solyc08g082460.2.ITAG2.4	306.01	466.792	425.684	117.242	89.191	133.827	399.496	113.42	1.81455	1.58e-13	1.05e-11	Solyc08g082460.2	SL2.50ch08	65260501	65261674	-	928	-	- && Q9LP77.1 RecName: Full=Probable inactive receptor kinase At1g48480; Flags: Precursor && PF07714:Protein tyrosine kinase	Pkinase_Tyr
Solyc08g077560.2.ITAG2.4	71.8881	84.8713	94.079	8.57866	13.0523	13.0808	83.6128	11.5706	2.86054	1.71e-13	1.14e-11	Solyc08g077560.2	SL2.50ch08	61541667	61545970	+	1896	-	- && Q9LTC0.1 RecName: Full=Probable receptor-like protein kinase At5g47070 && PF07714:Protein tyrosine kinase	Pkinase_Tyr
Solyc01g098530.2.ITAG2.4	69.9452	108.677	54.0256	0.953184	2.17539	4.02486	77.5491	2.38448	5.03158	1.71e-13	1.14e-11	Solyc01g098530.2	SL2.50ch01	89024581	89025343	-	345	-	- && Q3IDM3.1 RecName: Full=CTP synthase; AltName: Full=Cytidine 5'-triphosphate synthase; AltName: Full=Cytidine triphosphate synthetase; Short=CTP synthetase; Short=CTPS; AltName: Full=UTP--ammonia ligase && -	-
Solyc08g077360.2.ITAG2.4	211.778	158.357	81.0384	18.1105	19.5785	13.0808	150.391	16.9233	3.15253	1.79e-13	1.19e-11	Solyc08g077360.2	SL2.50ch08	61239875	61246355	-	2193	-	- && Q9FNX5.1 RecName: Full=Dynamin-related protein 1E; AltName: Full=Dynamin-like protein 4; AltName: Full=Dynamin-like protein DLP2; AltName: Full=Dynamin-like protein E && PF02212:Dynamin GTPase effector domain|PF00350:Dynamin family|PF01031:Dynamin central region	-
Solyc04g007000.1.ITAG2.4	294.353	433.672	530.941	85.7866	90.2787	127.789	419.655	101.285	2.05093	1.83e-13	1.21e-11	Solyc04g007000.1	SL2.50ch04	728928	730046	+	1119	-	- && Q9ZWM9.1 RecName: Full=AP2/ERF and B3 domain-containing transcription factor RAV1; AltName: Full=Ethylene-responsive transcription factor RAV1; AltName: Full=Protein RELATED TO ABI3/VP1 1 && PF00847:AP2 domain|PF02362:B3 DNA binding domain	B3
Solyc01g106210.2.ITAG2.4	3771.21	3295.49	4014.66	9010.45	10609.4	7350.41	3693.79	8990.08	-1.28314	2.02e-13	1.33e-11	Solyc01g106210.2	SL2.50ch01	94157485	94161397	+	2482	-	- && Q08276.1 RecName: Full=Heat shock 70 kDa protein, mitochondrial; Flags: Precursor && PF00012:Hsp70 protein	HSP70
Solyc02g014460.2.ITAG2.4	154.462	176.988	158.351	379.367	411.149	362.238	163.267	384.251	-1.23526	2.05e-13	1.34e-11	Solyc02g014460.2	SL2.50ch02	16627174	16630390	-	1767	-	- && Q4KLQ5.1 RecName: Full=WD repeat-containing protein 76 && -	-
Solyc05g012110.2.ITAG2.4	757.739	741.071	639.924	343.146	307.818	339.095	712.911	330.02	1.11025	2.05e-13	1.34e-11	Solyc05g012110.2	SL2.50ch05	5316351	5320016	-	1172	-	- && Q9LMX8.1 RecName: Full=Probable 6-phosphogluconolactonase 1; Short=6PGL 1 && PF01182:Glucosamine-6-phosphate isomerases/6-phosphogluconolactonase	-
Solyc03g025740.2.ITAG2.4	247.722	237.019	233.8	576.676	663.494	496.064	239.514	578.745	-1.27236	2.2e-13	1.43e-11	Solyc03g025740.2	SL2.50ch03	3144592	3148631	+	1241	-	- && - && -	-
Solyc03g121340.1.ITAG2.4	169.034	183.198	211.445	25.736	29.3678	55.3419	187.892	36.8152	2.35183	2.24e-13	1.46e-11	Solyc03g121340.1	SL2.50ch03	69464649	69464909	+	261	-	- && - && -	-
Solyc01g110690.2.ITAG2.4	124.347	124.202	100.599	19.0637	15.2277	29.1803	116.383	21.1572	2.45523	2.36e-13	1.53e-11	Solyc01g110690.2	SL2.50ch01	97301350	97302842	-	612	-	- && F4JN26.2 RecName: Full=DNA mismatch repair protein MLH3; AltName: Full=MutL protein homolog 3 && -	-
Solyc02g089500.2.ITAG2.4	428.414	351.905	245.91	103.897	67.4371	71.4413	342.076	80.9252	2.07661	2.49e-13	1.6e-11	Solyc02g089500.2	SL2.50ch02	51307887	51308594	-	541	-	- && O50055.1 RecName: Full=Zinc finger protein CONSTANS-LIKE 1 && PF00643:B-box zinc finger	zf-B_box
Solyc03g006080.2.ITAG2.4	257.437	190.443	239.389	48.6124	75.051	66.4102	229.09	63.3579	1.85893	2.62e-13	1.68e-11	Solyc03g006080.2	SL2.50ch03	759901	763527	+	3391	-	- && C0LGP4.1 RecName: Full=Probable LRR receptor-like serine/threonine-protein kinase At3g47570; Flags: Precursor && PF00069:Protein kinase domain|PF13855:Leucine rich repeat	Pkinase
Solyc01g097970.2.ITAG2.4	231.208	221.493	274.785	580.489	776.614	581.593	242.495	646.232	-1.41271	2.95e-13	1.89e-11	Solyc01g097970.2	SL2.50ch01	88623378	88624528	+	722	-	- && Q9STG6.1 RecName: Full=Deoxyuridine 5'-triphosphate nucleotidohydrolase; Short=dUTPase; AltName: Full=dUTP pyrophosphatase; AltName: Full=dUTP-pyrophosphatase-like 1; Short=AtDUT1 && PF00692:dUTPase	-
Solyc01g080170.2.ITAG2.4	1094.84	1071.24	958.488	478.499	377.43	502.102	1041.52	452.677	1.20115	3.03e-13	1.94e-11	Solyc01g080170.2	SL2.50ch01	79385428	79394846	+	1709	-	- && O81027.2 RecName: Full=Hydroxymethylglutaryl-CoA lyase, mitochondrial; Short=HL; Short=HMG-CoA lyase; AltName: Full=3-hydroxy-3-methylglutarate-CoA lyase && PF00682:HMGL-like	HMGL-like
Solyc10g050520.1.ITAG2.4	94.2317	83.8363	91.2846	12.3914	19.5785	10.0622	89.7842	14.0107	2.69042	3.15e-13	2.01e-11	Solyc10g050520.1	SL2.50ch10	49935609	49937051	-	219	-	- && - && -	-
Solyc12g038090.1.ITAG2.4	8.74315	19.6653	24.2184	123.914	113.12	104.646	17.5423	113.894	-2.69726	3.17e-13	2.01e-11	Solyc12g038090.1	SL2.50ch12	49181933	49182100	-	168	-	- && - && -	-
Solyc07g043230.2.ITAG2.4	393.442	723.476	595.213	158.229	156.628	175.082	570.71	163.313	1.80471	3.19e-13	2.02e-11	Solyc07g043230.2	SL2.50ch07	56827490	56830478	-	1444	-	- && Q9SLG3.1 RecName: Full=Zinc transporter 3; AltName: Full=ZRT/IRT-like protein 3; Flags: Precursor && PF02535:ZIP Zinc transporter	-
Solyc01g107380.2.ITAG2.4	1342.56	1447.99	1454.03	725.373	613.46	752.649	1414.86	697.161	1.02052	3.25e-13	2.05e-11	Solyc01g107380.2	SL2.50ch01	94938441	94943980	-	1789	-	- && - && PF05542:Protein of unknown function (DUF760)	-
Solyc07g061890.1.ITAG2.4	170.977	203.898	276.648	53.3783	56.5602	34.2113	217.174	48.0499	2.17795	3.7e-13	2.33e-11	Solyc07g061890.1	SL2.50ch07	64776805	64777356	+	552	-	- && - && -	-
Solyc07g062490.1.ITAG2.4	590.648	706.916	1829.42	182.058	130.523	118.733	1042.33	143.772	2.85754	3.81e-13	2.39e-11	Solyc07g062490.1	SL2.50ch07	65208382	65209275	+	894	-	- && Q39688.1 RecName: Full=Epidermis-specific secreted glycoprotein EP1; AltName: Full=52/54 kDa medium protein; Flags: Precursor && PF01453:D-mannose binding lectin	B_lectin
Solyc03g114100.1.ITAG2.4	3543.89	3878.2	4718.86	1525.09	1502.11	1956.08	4046.98	1661.1	1.28472	4.05e-13	2.53e-11	Solyc03g114100.1	SL2.50ch03	64135197	64135574	+	378	-	- && - && -	-
Solyc09g010230.1.ITAG2.4	753.854	1187.16	431.273	149.65	95.7172	158.982	790.763	134.783	2.55112	4.46e-13	2.78e-11	Solyc09g010230.1	SL2.50ch09	3624972	3628689	+	1038	-	- && Q9FNI3.1 RecName: Full=B3 domain-containing protein At5g06250 && PF02362:B3 DNA binding domain	B3
Solyc02g062550.2.ITAG2.4	217.607	510.263	1033.01	41.9401	43.5078	76.4724	586.959	53.9734	3.44295	4.49e-13	2.79e-11	Solyc02g062550.2	SL2.50ch02	34275290	34277458	-	1883	-	- && Q8VZG2.1 RecName: Full=Protein HYPER-SENSITIVITY-RELATED 4; Short=AtHSR4; AltName: Full=BCS1-like protein && PF14363:Domain associated at C-terminal with AAA|PF00004:ATPase family associated with various cellular activities (AAA)	AAA
Solyc12g014100.1.ITAG2.4	647.964	602.379	590.556	247.828	213.188	297.84	613.633	252.952	1.27757	4.49e-13	2.79e-11	Solyc12g014100.1	SL2.50ch12	4918492	4923176	+	1392	-	- && Q9ZRA2.2 RecName: Full=Homogentisate 1,2-dioxygenase; AltName: Full=Homogentisate oxygenase; AltName: Full=Homogentisic acid oxidase; AltName: Full=Homogentisicase && PF04209:homogentisate 1,2-dioxygenase	-
Solyc03g097600.2.ITAG2.4	109.775	129.377	111.777	367.929	453.569	287.778	116.976	369.759	-1.66053	4.73e-13	2.93e-11	Solyc03g097600.2	SL2.50ch03	59936732	59938490	-	1221	-	- && Q9LUE3.1 RecName: Full=Bidirectional sugar transporter SWEET10; Short=AtSWEET10; AltName: Full=Protein SUGARS WILL EVENTUALLY BE EXPORTED TRANSPORTERS 10 && PF03083:Sugar efflux transporter for intercellular exchange	-
Solyc03g115980.1.ITAG2.4	143.776	156.287	136.927	621.476	357.852	468.897	145.663	482.741	-1.73007	4.75e-13	2.93e-11	Solyc03g115980.1	SL2.50ch03	65535961	65537355	+	1395	-	- && Q9ZS34.1 RecName: Full=Geranylgeranyl diphosphate reductase, chloroplastic; AltName: Full=Geranylgeranyl reductase; Flags: Precursor && -	-
Solyc11g072760.1.ITAG2.4	37.887	47.6107	37.259	154.416	137.05	144.895	40.9189	145.454	-1.83339	4.76e-13	2.93e-11	Solyc11g072760.1	SL2.50ch11	55962509	55963429	-	921	-	- && Q9SLP4.1 RecName: Full=Chitinase 1; AltName: Full=Tulip bulb chitinase-1; Short=TBC-1; Flags: Precursor && PF00704:Glycosyl hydrolases family 18	-
Solyc03g114970.2.ITAG2.4	726.653	485.422	705.127	121.054	192.522	209.293	639.067	174.29	1.87615	4.81e-13	2.96e-11	Solyc03g114970.2	SL2.50ch03	64833280	64834554	-	675	-	- && B3H4F1.1 RecName: Full=Protein SPIRAL1-like 1 && -	-
Solyc03g112300.2.ITAG2.4	165.148	218.388	152.762	44.7997	29.3678	49.3046	178.766	41.1573	2.11331	4.94e-13	3.03e-11	Solyc03g112300.2	SL2.50ch03	62743675	62745560	-	780	-	- && - && -	-
Solyc11g032130.1.ITAG2.4	134.062	140.762	122.023	35.2678	36.9816	36.2238	132.282	36.1577	1.87127	5.31e-13	3.24e-11	Solyc11g032130.1	SL2.50ch11	25024338	25033470	-	1065	-	- && Q9XG54.1 RecName: Full=12-oxophytodienoate reductase 1; AltName: Full=12-oxophytodienoate-10,11-reductase 1; Short=OPDA-reductase 1; AltName: Full=LeOPR1 && PF00724:NADH:flavin oxidoreductase / NADH oxidase family	Oxidored_FMN
Solyc03g083560.1.ITAG2.4	712.081	831.118	788.96	1462.18	1540.18	1755.85	777.386	1586.07	-1.02887	5.72e-13	3.48e-11	Solyc03g083560.1	SL2.50ch03	53511747	53512796	+	1050	-	- && Q9FHM9.1 RecName: Full=Protein EXORDIUM-like 3; Flags: Precursor && PF04674:Phosphate-induced protein 1 conserved region	-
Solyc05g054610.1.ITAG2.4	550.818	558.908	612.911	1260.11	1546.7	1137.02	574.213	1314.61	-1.19449	5.74e-13	3.48e-11	Solyc05g054610.1	SL2.50ch05	64486444	64486755	+	312	-	- && P35057.2 RecName: Full=Histone H4 >Q6V9I2.3 RecName: Full=Histone H4 >Q71V09.3 RecName: Full=Histone H4; AltName: Full=CaH4 && PF15511:Centromere kinetochore component CENP-T histone fold	-
Solyc07g056320.2.ITAG2.4	65.0879	121.097	108.983	0.953184	0	9.05594	98.3891	3.33638	4.87027	5.77e-13	3.5e-11	Solyc07g056320.2	SL2.50ch07	64167013	64170660	-	1860	-	- && Q9SHJ5.1 RecName: Full=Glycerol-3-phosphate acyltransferase 1; Short=AtGPAT1 && PF01553:Acyltransferase	Acyltransferase
Solyc07g042170.2.ITAG2.4	2088.64	2426.08	3658.84	623.383	518.831	930.75	2724.52	690.988	1.97915	5.89e-13	3.56e-11	Solyc07g042170.2	SL2.50ch07	55184686	55185886	+	1051	-	- && Q8H395.1 RecName: Full=Protein TIFY 10b; Short=OsTIFY10b; AltName: Full=Jasmonate ZIM domain-containing protein 7; Short=OsJAZ7; AltName: Full=OsJAZ6 && PF06200:tify domain|PF09425:Divergent CCT motif	Zim
Solyc05g051910.1.ITAG2.4	333.211	233.914	338.126	84.8334	107.682	83.5159	301.75	92.0104	1.71639	5.94e-13	3.58e-11	Solyc05g051910.1	SL2.50ch05	62300177	62305193	+	2838	-	- && - && PF07690:Major Facilitator Superfamily	MFS_1
Solyc02g092530.2.ITAG2.4	177.777	117.992	135.995	38.1274	26.1047	24.1492	143.922	29.4604	2.28424	6.38e-13	3.83e-11	Solyc02g092530.2	SL2.50ch02	53595367	53600665	-	1762	-	- && Q50228.1 RecName: Full=Formamidase; AltName: Full=Formamide amidohydrolase && PF03069:Acetamidase/Formamidase family	FmdA_AmdA
Solyc06g083150.2.ITAG2.4	934.545	1027.77	1141.06	469.92	440.517	529.269	1034.46	479.902	1.10788	6.42e-13	3.85e-11	Solyc06g083150.2	SL2.50ch06	48687538	48692219	+	1331	-	- && Q9SRS9.1 RecName: Full=E3 ubiquitin-protein ligase CHIP; AltName: Full=Carboxyl terminus of HSC70-interacting protein; Short=AtCHIP; AltName: Full=Plant U-box protein 61; AltName: Full=U-box domain-containing protein 61 && PF04564:U-box domain|PF13414:TPR repeat	U-box
Solyc05g050380.2.ITAG2.4	375.955	553.733	662.279	104.85	112.033	173.069	530.656	129.984	2.02951	6.72e-13	4.02e-11	Solyc05g050380.2	SL2.50ch05	60487754	60492347	+	2073	-	- && Q9LD40.2 RecName: Full=Putative cyclic nucleotide-gated ion channel 13; AltName: Full=Cyclic nucleotide- and calmodulin-regulated ion channel 13 && PF00520:Ion transport protein	Ion_trans
Solyc04g071090.2.ITAG2.4	1356.16	1615.66	1431.68	519.485	415.5	673.158	1467.83	536.048	1.45267	6.83e-13	4.05e-11	Solyc04g071090.2	SL2.50ch04	58004131	58004832	-	273	-	- && - && -	-
Solyc07g043400.1.ITAG2.4	725.681	739.001	688.36	1877.77	1801.22	1342.29	717.681	1673.76	-1.2218	7.49e-13	4.43e-11	Solyc07g043400.1	SL2.50ch07	57109525	57109728	-	204	-	- && - && -	-
Solyc03g031430.1.ITAG2.4	172.92	192.513	133.201	47.6592	38.0693	44.2735	166.211	43.334	1.93553	7.66e-13	4.52e-11	Solyc03g031430.1	SL2.50ch03	3985448	3986176	+	729	-	- && Q9XHZ3.1 RecName: Full=Urease accessory protein F; Short=AtUREF && PF01730:UreF	-
Solyc05g041920.2.ITAG2.4	231.208	434.707	448.971	78.1611	87.0156	97.6029	371.628	87.5932	2.08535	7.86e-13	4.61e-11	Solyc05g041920.2	SL2.50ch05	54237353	54240833	-	949	-	- && Q69KJ0.1 RecName: Full=Ribonuclease 3-like protein 3; AltName: Full=Ribonuclease III-like protein 3; Short=RNase III-like protein 3 && PF00636:Ribonuclease III domain	Ribonuclease_3
Solyc03g082520.1.ITAG2.4	106.861	82.8013	227.28	1.90637	10.877	12.0746	138.981	8.28597	4.0825	8.36e-13	4.88e-11	Solyc03g082520.1	SL2.50ch03	52456478	52456831	-	354	-	- && Q9ZUZ3.1 RecName: Full=Auxin-responsive protein SAUR32; AltName: Full=Protein ABOLISHED APICAL HOOK MAINTENANCE 1; AltName: Full=Protein SMALL AUXIN UP RNA 32 && PF02519:Auxin responsive protein	Auxin_inducible
Solyc06g072240.1.ITAG2.4	241.894	231.844	217.965	608.132	774.439	506.127	230.568	629.566	-1.44879	8.49e-13	4.94e-11	Solyc06g072240.1	SL2.50ch06	44511031	44511342	+	312	-	- && P35057.2 RecName: Full=Histone H4 >Q6V9I2.3 RecName: Full=Histone H4 >Q71V09.3 RecName: Full=Histone H4; AltName: Full=CaH4 && PF15511:Centromere kinetochore component CENP-T histone fold	-
Solyc01g087030.2.ITAG2.4	769.397	810.417	809.452	347.912	348.063	428.648	796.422	374.874	1.08697	8.77e-13	5.08e-11	Solyc01g087030.2	SL2.50ch01	81946490	81954281	-	1508	-	- && Q5ZA07.1 RecName: Full=E3 ubiquitin-protein ligase makorin; AltName: Full=Zinc finger CCCH domain-containing protein 41; Short=OsC3H41 && PF00097:Zinc finger, C3HC4 type (RING finger)	zf-C3HC4
Solyc02g094030.2.ITAG2.4	1875.89	1904.43	2386.44	780.658	615.636	932.762	2055.59	776.352	1.40449	8.95e-13	5.17e-11	Solyc02g094030.2	SL2.50ch02	54682396	54685366	+	1182	-	- && Q9LK32.1 RecName: Full=Uncharacterized protein At3g27210 && -	-
Solyc12g099970.1.ITAG2.4	3180.56	2507.84	3331.89	1434.54	1311.76	1441.91	3006.76	1396.07	1.10685	9.02e-13	5.2e-11	Solyc12g099970.1	SL2.50ch12	66901202	66904336	+	870	-	- && Q84VQ1.1 RecName: Full=SNF1-related protein kinase regulatory subunit beta-1; Short=AKIN subunit beta-1; Short=AKINB1; Short=AKINbeta1 && PF16561:Glycogen recognition site of AMP-activated protein kinase|PF04739:5'-AMP-activated protein kinase beta subunit, interaction domain	-
Solyc11g011570.1.ITAG2.4	65.0879	125.237	49.3682	1.90637	4.35078	2.01243	79.8977	2.75653	4.87671	9.17e-13	5.27e-11	Solyc11g011570.1	SL2.50ch11	4638052	4639160	-	930	-	- && Q8W571.3 RecName: Full=RING-H2 finger protein ATL32; AltName: Full=RING-type E3 ubiquitin transferase ATL32; Flags: Precursor && PF13639:Ring finger domain	-
Solyc01g108910.2.ITAG2.4	622.706	947.039	930.544	115.335	167.505	266.647	833.43	183.163	2.18638	9.7e-13	5.55e-11	Solyc01g108910.2	SL2.50ch01	96036693	96038853	-	903	-	- && Q9XIM0.1 RecName: Full=CCG-binding protein 1; Short=AtCBP1; AltName: Full=Protein MATERNAL EFFECT EMBRYO ARREST 14 && -	-
Solyc02g068460.1.ITAG2.4	70.9166	264.964	346.509	9.53184	16.3154	21.1305	227.463	15.6593	3.86377	1.1e-12	6.24e-11	Solyc02g068460.1	SL2.50ch02	38401854	38402432	-	579	-	- && Q9LIE6.1 RecName: Full=VQ motif-containing protein 22; Short=AtVQ22 && PF05678:VQ motif	-
Solyc03g111800.2.ITAG2.4	185.549	219.423	174.186	61.0038	44.5955	64.3978	193.053	56.6657	1.76409	1.11e-12	6.32e-11	Solyc03g111800.2	SL2.50ch03	62423423	62425742	-	2170	-	- && Q9SKB2.1 RecName: Full=Leucine-rich repeat receptor-like serine/threonine/tyrosine-protein kinase SOBIR1; AltName: Full=Protein EVERSHED; AltName: Full=Protein SUPPRESSOR OF BIR1-1; Flags: Precursor && PF00069:Protein kinase domain|PF13855:Leucine rich repeat	Pkinase
Solyc01g112220.2.ITAG2.4	732.481	909.779	1071.2	373.648	371.992	360.225	904.486	368.622	1.29512	1.17e-12	6.61e-11	Solyc01g112220.2	SL2.50ch01	98271488	98273976	-	1692	-	- && P27450.2 RecName: Full=Probable serine/threonine-protein kinase Cx32, chloroplastic; Flags: Precursor && PF07714:Protein tyrosine kinase	Pkinase_Tyr
Solyc04g081440.2.ITAG2.4	10369.4	11212.3	9782.36	5367.38	4554.18	5758.57	10454.7	5226.71	1.00007	1.19e-12	6.7e-11	Solyc04g081440.2	SL2.50ch04	65414803	65419467	-	2072	-	- && Q9SW48.1 RecName: Full=Probable alkaline/neutral invertase B; Short=A/N-INVB && PF12899:Alkaline and neutral invertase	-
Solyc01g103970.2.ITAG2.4	509.045	513.368	855.095	188.73	192.522	187.156	625.836	189.47	1.7244	1.27e-12	7.14e-11	Solyc01g103970.2	SL2.50ch01	92450490	92454138	+	1284	-	- && - && PF00097:Zinc finger, C3HC4 type (RING finger)	zf-C3HC4
Solyc03g113970.2.ITAG2.4	751.911	753.491	912.846	366.023	345.887	399.468	806.083	370.459	1.12161	1.28e-12	7.21e-11	Solyc03g113970.2	SL2.50ch03	64027073	64032915	+	1946	-	- && - && PF07887:Calmodulin binding protein-like	-
Solyc10g050680.1.ITAG2.4	170.977	112.817	90.3531	19.0637	19.5785	23.143	124.716	20.5951	2.59804	1.29e-12	7.22e-11	Solyc10g050680.1	SL2.50ch10	50357900	50358334	-	231	-	- && - && -	-
Solyc01g073800.2.ITAG2.4	1857.43	1816.45	2457.23	824.504	754.861	955.905	2043.71	845.09	1.27399	1.39e-12	7.77e-11	Solyc01g073800.2	SL2.50ch01	81157477	81158393	-	917	-	- && - && -	-
Solyc09g089610.2.ITAG2.4	103.946	183.198	55.8885	6.67229	8.70156	10.0622	114.344	8.47867	3.75475	1.41e-12	7.85e-11	Solyc09g089610.2	SL2.50ch09	69357833	69360353	+	2410	-	- && Q0WPQ2.2 RecName: Full=Ethylene receptor 2; Short=AtETR2; AltName: Full=Protein ETHYLENE RESPONSE 2; AltName: Full=Protein ETR2 && PF00072:Response regulator receiver domain|PF00512:His Kinase A (phospho-acceptor) domain|PF01590:GAF domain	Response_reg
Solyc12g094650.1.ITAG2.4	84.5171	203.898	149.036	4.76592	2.17539	18.1119	145.817	8.35107	4.11891	1.44e-12	8e-11	Solyc12g094650.1	SL2.50ch12	64815719	64818473	-	2088	-	- && - && PF04578:Protein of unknown function, DUF594|PF13968:Domain of unknown function (DUF4220)	-
Solyc03g059110.1.ITAG2.4	238.008	219.423	158.351	59.0974	41.3324	59.3667	205.261	53.2655	1.94202	1.53e-12	8.47e-11	Solyc03g059110.1	SL2.50ch03	27671722	27671895	-	174	-	- && - && -	-
Solyc01g095100.2.ITAG2.4	2122.64	2577.19	2740.4	637.68	634.126	1072.63	2480.08	781.478	1.66603	1.53e-12	8.47e-11	Solyc01g095100.2	SL2.50ch01	86498886	86500479	+	1330	-	- && O04609.1 RecName: Full=WRKY transcription factor 22; AltName: Full=WRKY DNA-binding protein 22 && PF03106:WRKY DNA -binding domain	WRKY
Solyc09g011560.2.ITAG2.4	198.178	508.193	424.753	54.3315	60.9109	82.5097	377.041	65.9174	2.51598	1.54e-12	8.48e-11	Solyc09g011560.2	SL2.50ch09	4840014	4841512	+	1043	-	- && P32111.1 RecName: Full=Probable glutathione S-transferase; AltName: Full=Pathogenesis-related protein 1 && PF13417:Glutathione S-transferase, N-terminal domain|PF00043:Glutathione S-transferase, C-terminal domain	GST_C
Solyc02g089720.1.ITAG2.4	2993.07	4437.11	3648.59	651.978	542.76	1274.88	3692.92	823.204	2.16527	1.65e-12	9.06e-11	Solyc02g089720.1	SL2.50ch02	51458793	51460952	+	2160	-	- && D4AZ24.1 RecName: Full=Probable endo-1,3(4)-beta-glucanase ARB_01444; Short=Endo-1,3-beta-glucanase; Short=Endo-1,4-beta-glucanase; AltName: Full=Laminarinase; Flags: Precursor && PF03639:Glycosyl hydrolase family 81	-
Solyc07g053760.2.ITAG2.4	1755.43	2298.77	2110.72	760.641	720.054	999.172	2054.97	826.623	1.31362	1.67e-12	9.15e-11	Solyc07g053760.2	SL2.50ch07	62192557	62194980	-	1255	-	- && Q93YW5.1 RecName: Full=Probable protein phosphatase 2C 58; Short=AtPP2C58 && PF00481:Protein phosphatase 2C	PP2C
Solyc11g018580.1.ITAG2.4	3645.89	3402.1	2302.61	1202.92	1217.13	1209.47	3116.87	1209.84	1.3652	1.74e-12	9.52e-11	Solyc11g018580.1	SL2.50ch11	8753165	8759597	+	1833	-	- && Q9CAP8.1 RecName: Full=Long chain acyl-CoA synthetase 9, chloroplastic && PF00501:AMP-binding enzyme	AMP-binding
Solyc03g097570.2.ITAG2.4	8.74315	12.4202	1.86295	87.693	106.594	69.4289	7.67543	87.9053	-3.53533	1.82e-12	9.93e-11	Solyc03g097570.2	SL2.50ch03	59900412	59903963	-	1124	-	- && Q9LUE3.1 RecName: Full=Bidirectional sugar transporter SWEET10; Short=AtSWEET10; AltName: Full=Protein SUGARS WILL EVENTUALLY BE EXPORTED TRANSPORTERS 10 && PF03083:Sugar efflux transporter for intercellular exchange	-
Solyc03g044910.1.ITAG2.4	1453.31	1767.81	1126.15	386.04	314.344	557.444	1449.09	419.276	1.78862	1.88e-12	1.02e-10	Solyc03g044910.1	SL2.50ch03	10911356	10912219	+	864	-	- && Q9SYY4.1 RecName: Full=Elongation of fatty acids protein 3-like; Short=Protein ELO3-like; AltName: Full=Protein HIGH EXPRESSION OF OSMOTICALLY RESPONSIVE GENES 3; AltName: Full=Very long-chain fatty acid condensing enzyme HOS3; Short=VLCFA condensing enzyme HOS3 && PF01151:GNS1/SUR4 family	ELO
Solyc02g080040.2.ITAG2.4	99.089	168.708	262.676	30.5019	14.14	17.1057	176.824	20.5825	3.09599	1.97e-12	1.07e-10	Solyc02g080040.2	SL2.50ch02	44373984	44376613	-	1629	-	- && Q8GYA4.3 RecName: Full=Cysteine-rich receptor-like protein kinase 10; Short=Cysteine-rich RLK10; AltName: Full=Receptor-like protein kinase 4; Flags: Precursor && PF07714:Protein tyrosine kinase	Pkinase_Tyr
Solyc02g077880.2.ITAG2.4	6055.11	6811.44	5549.73	1520.33	1792.52	2740.93	6138.76	2017.93	1.60508	2.14e-12	1.15e-10	Solyc02g077880.2	SL2.50ch02	42713672	42714750	+	768	-	- && P93017.1 RecName: Full=Dormancy-associated protein homolog 1; AltName: Full=Auxin-repressed protein 1; Short=AtARP1; AltName: Full=DRM1 homolog 1; AltName: Full=Dormancy-associated protein 2; Short=AtDRM2 && PF05564:Dormancy/auxin associated protein	-
Solyc01g100280.2.ITAG2.4	249.665	238.054	206.788	531.877	560.163	470.909	231.502	520.983	-1.17057	2.17e-12	1.17e-10	Solyc01g100280.2	SL2.50ch01	90352624	90358296	+	2336	-	- && Q9FT74.1 RecName: Full=ATP-dependent DNA helicase Q-like 1; AltName: Full=RecQ-like protein 1; Short=AtRecQ1; Short=AtRecQl1 && PF00271:Helicase conserved C-terminal domain|PF16124:RecQ zinc-binding|PF00270:DEAD/DEAH box helicase	DEAD
Solyc03g115990.1.ITAG2.4	1753.49	1607.38	1717.64	3733.62	3870.02	2954.25	1692.84	3519.3	-1.05574	2.27e-12	1.22e-10	Solyc03g115990.1	SL2.50ch03	65541130	65542368	+	1239	-	- && Q9SN86.1 RecName: Full=Malate dehydrogenase, chloroplastic; AltName: Full=pNAD-MDH; Flags: Precursor && PF00056:lactate/malate dehydrogenase, NAD binding domain|PF02866:lactate/malate dehydrogenase, alpha/beta C-terminal domain	-
Solyc01g060130.2.ITAG2.4	234.122	263.929	257.087	489.937	543.848	550.4	251.713	528.061	-1.0688	2.28e-12	1.22e-10	Solyc01g060130.2	SL2.50ch01	69592187	69594251	+	974	-	- && P52884.1 RecName: Full=GTP-binding protein SAR2 && PF00025:ADP-ribosylation factor family	Arf
Solyc11g068940.1.ITAG2.4	86.46	92.1164	276.648	15.2509	5.43848	7.04351	151.742	9.24431	4.02577	2.36e-12	1.26e-10	Solyc11g068940.1	SL2.50ch11	53492962	53494233	-	1272	-	- && Q9SF15.1 RecName: Full=E3 ubiquitin-protein ligase PUB24; AltName: Full=Plant U-box protein 24; AltName: Full=U-box domain-containing protein 24 && PF04564:U-box domain	U-box
Solyc07g026710.1.ITAG2.4	0	0	0	104.85	63.0863	61.3792	0	76.4386	-8.73211	2.43e-12	1.3e-10	Solyc07g026710.1	SL2.50ch07	30496008	30496163	+	156	-	- && - && -	-
Solyc02g078660.2.ITAG2.4	1527.14	1282.38	1481.98	541.409	467.709	703.345	1430.5	570.821	1.32513	2.53e-12	1.34e-10	Solyc02g078660.2	SL2.50ch02	43323941	43328371	-	2961	-	- && Q1PEB4.1 RecName: Full=Uncharacterized protein At4g04980 && -	-
Solyc04g074830.1.ITAG2.4	678.08	1056.75	1210.92	239.249	226.241	349.157	981.916	271.549	1.85419	2.57e-12	1.36e-10	Solyc04g074830.1	SL2.50ch04	60747856	60748872	+	1017	-	- && Q8H0W9.2 RecName: Full=Putative clathrin assembly protein At5g10410 && PF07651:ANTH domain	-
Solyc01g101030.2.ITAG2.4	412.871	410.901	434.999	909.338	1025.7	779.817	419.59	904.951	-1.10837	3.11e-12	1.64e-10	Solyc01g101030.2	SL2.50ch01	90891148	90895145	-	3433	-	- && Q8H6B1.1 RecName: Full=FACT complex subunit SPT16; AltName: Full=Facilitates chromatin transcription complex subunit SPT16; AltName: Full=Global transcription factor group C protein 102 && PF14826:FACT complex subunit SPT16 N-terminal lobe domain|PF08644:FACT complex subunit (SPT16/CDC68)|PF00557:Metallopeptidase family M24|PF08512:Histone chaperone Rttp106-like	Peptidase_M24
Solyc04g071100.1.ITAG2.4	1040.43	1473.86	1685.04	507.094	560.163	500.089	1399.78	522.449	1.42212	3.12e-12	1.64e-10	Solyc04g071100.1	SL2.50ch04	58004882	58005163	+	282	-	- && - && -	-
Solyc04g076990.2.ITAG2.4	1237.64	1900.29	2244.86	511.86	382.869	626.872	1794.26	507.2	1.82241	3.33e-12	1.75e-10	Solyc04g076990.2	SL2.50ch04	61947203	61949524	+	1816	-	- && Q9LJM4.1 RecName: Full=Receptor-like protein kinase HAIKU2; Flags: Precursor && PF00069:Protein kinase domain	Pkinase
Solyc01g007780.2.ITAG2.4	452.701	536.138	534.667	179.199	212.101	239.479	507.835	210.26	1.2729	3.37e-12	1.77e-10	Solyc01g007780.2	SL2.50ch01	1927800	1931714	-	905	-	- && Q8LE10.2 RecName: Full=HVA22-like protein i; Short=AtHVA22i && PF03134:TB2/DP1, HVA22 family	TB2_DP1_HVA22
Solyc07g007320.1.ITAG2.4	1185.18	960.495	1741.86	327.895	466.621	361.231	1295.85	385.249	1.75095	3.38e-12	1.77e-10	Solyc07g007320.1	SL2.50ch07	2042522	2043986	+	768	-	- && - && PF04640:PLATZ transcription factor	-
Solyc02g032850.2.ITAG2.4	761.625	683.11	809.452	296.44	317.607	385.381	751.396	333.143	1.17387	3.49e-12	1.82e-10	Solyc02g032850.2	SL2.50ch02	29420332	29430507	+	2021	-	- && Q9S745.1 RecName: Full=Lipase-like PAD4; AltName: Full=Protein ENHANCED DISEASE SUSCEPTIBILITY 9; AltName: Full=Protein PHYTOALEXIN DEFICIENT 4; Short=AtPAD4 && PF01764:Lipase (class 3)	Lipase_3
Solyc11g017270.1.ITAG2.4	409.956	570.294	621.294	118.195	87.0156	184.137	533.848	129.783	2.03912	3.49e-12	1.82e-10	Solyc11g017270.1	SL2.50ch11	8140406	8143583	-	2859	-	- && O22938.1 RecName: Full=Leucine-rich repeat receptor-like tyrosine-protein kinase PXC3; AltName: Full=Protein PXY/TDR-CORRELATED 3; Flags: Precursor && PF13855:Leucine rich repeat|PF07714:Protein tyrosine kinase	Pkinase_Tyr
Solyc08g059700.1.ITAG2.4	118.518	127.307	122.955	0	1.0877	0	122.927	0.362565	8.40204	3.65e-12	1.9e-10	Solyc08g059700.1	SL2.50ch08	44748594	44749893	+	1020	-	- && - && -	-
Solyc02g065740.2.ITAG2.4	688.766	581.679	581.241	1336.36	1298.71	1139.04	617.228	1258.04	-1.02725	3.73e-12	1.94e-10	Solyc02g065740.2	SL2.50ch02	36890819	36893340	-	1318	-	- && O04300.1 RecName: Full=Alpha-1,4-glucan-protein synthase [UDP-forming]; AltName: Full=Reversibly glycosylated polypeptide 1; AltName: Full=UDP-glucose:protein transglucosylase; Short=UPTG [Pisum sativum] && PF03214:Reversibly glycosylated polypeptide	-
Solyc12g045020.1.ITAG2.4	538.189	494.737	633.403	255.453	209.925	183.131	555.443	216.17	1.36097	4.14e-12	2.14e-10	Solyc12g045020.1	SL2.50ch12	37473479	37475302	-	1482	-	- && H2DH18.1 RecName: Full=Cytochrome P450 CYP736A12 [Panax ginseng] && PF00067:Cytochrome P450	p450
Solyc06g054270.2.ITAG2.4	332.24	195.618	227.28	45.7528	65.2617	72.4475	251.713	61.154	2.04377	4.17e-12	2.15e-10	Solyc06g054270.2	SL2.50ch06	37078888	37081616	-	1839	-	- && Q9SBA7.2 RecName: Full=Sugar transport protein 8; AltName: Full=Hexose transporter 8 && PF00083:Sugar (and other) transporter	Sugar_tr
Solyc03g121460.1.ITAG2.4	2298.48	3095.73	2860.56	1339.22	1171.45	1321.16	2751.59	1277.28	1.10694	4.27e-12	2.19e-10	Solyc03g121460.1	SL2.50ch03	69563689	69564237	-	549	-	- && Q9LIC6.1 RecName: Full=PRA1 family protein F3; Short=AtPRA1.F3; AltName: Full=Prenylated Rab acceptor 8 && PF03208:PRA1 family protein	-
Solyc03g044580.1.ITAG2.4	21.3721	9.31514	8.38328	101.038	102.243	80.4973	13.0235	94.5927	-2.85973	4.4e-12	2.26e-10	Solyc03g044580.1	SL2.50ch03	10178511	10178846	+	336	-	- && - && -	-
Solyc05g055870.2.ITAG2.4	1323.13	841.468	926.818	326.942	417.675	345.132	1030.47	363.25	1.50504	4.41e-12	2.26e-10	Solyc05g055870.2	SL2.50ch05	65336699	65339030	-	1312	-	- && Q3E6P4.1 RecName: Full=F-box protein At2g02240 && PF14299:Phloem protein 2	-
Solyc08g007480.1.ITAG2.4	604.249	1273.07	812.247	157.275	176.207	272.684	896.522	202.056	2.14939	4.44e-12	2.27e-10	Solyc08g007480.1	SL2.50ch08	2046022	2047493	+	657	-	- && - && PF07279:Protein of unknown function (DUF1442)	-
Solyc11g010980.1.ITAG2.4	32.0582	57.9609	29.8072	241.156	159.891	174.075	39.9421	191.707	-2.26929	4.53e-12	2.31e-10	Solyc11g010980.1	SL2.50ch11	4015080	4019102	-	1080	-	- && Q6V4H0.1 RecName: Full=8-hydroxygeraniol dehydrogenase; Short=Cr10HGO && PF00107:Zinc-binding dehydrogenase|PF08240:Alcohol dehydrogenase GroES-like domain	ADH_N
Solyc03g033540.2.ITAG2.4	3451.6	3486.97	5326.18	1377.35	1031.14	1593.85	4088.25	1334.11	1.61548	4.91e-12	2.5e-10	Solyc03g033540.2	SL2.50ch03	5075974	5083464	-	2287	-	- && Q9FKW4.1 RecName: Full=Calcium-dependent protein kinase 28 && PF13499:EF-hand domain pair|PF00069:Protein kinase domain	Pkinase
Solyc01g079810.2.ITAG2.4	858.771	920.129	1157.82	420.354	358.939	452.797	978.908	410.697	1.25279	5.36e-12	2.72e-10	Solyc01g079810.2	SL2.50ch01	78940992	78946811	+	1635	-	- && Q4TU14.1 RecName: Full=E3 ubiquitin-protein ligase RHF1A; AltName: Full=RING-H2 finger F1a; AltName: Full=RING-H2 zinc finger protein RHF1a && PF13639:Ring finger domain	-
Solyc04g064530.1.ITAG2.4	1294.96	1487.32	1084.24	423.214	379.606	587.63	1288.84	463.483	1.47499	5.87e-12	2.97e-10	Solyc04g064530.1	SL2.50ch04	55686479	55687501	-	1023	-	- && - && -	-
Solyc12g014140.1.ITAG2.4	35.944	54.8558	16.7666	285.955	158.804	294.821	35.8555	246.527	-2.7878	7.67e-12	3.87e-10	Solyc12g014140.1	SL2.50ch12	4950340	4951524	-	1185	-	- && Q9MAH8.1 RecName: Full=Transcription factor TCP3 && PF03634:TCP family transcription factor	TCP
Solyc07g061950.2.ITAG2.4	3285.48	2691.04	1543.46	685.34	468.797	758.687	2506.66	637.608	1.97464	8.15e-12	4.1e-10	Solyc07g061950.2	SL2.50ch07	64816188	64823799	-	2765	-	- && Q93XX4.2 RecName: Full=C2 domain-containing protein At1g53590; AltName: Full=N-terminal-TM-C2 domain type 6 protein 1; Short=NTMC2TYPE6.1 && PF00168:C2 domain	C2
Solyc06g010030.2.ITAG2.4	489.616	665.515	930.544	197.309	188.171	236.461	695.225	207.314	1.74568	9.17e-12	4.6e-10	Solyc06g010030.2	SL2.50ch06	4786764	4792828	+	1946	-	- && Q94KB7.2 RecName: Full=MLO-like protein 6; Short=AtMlo6 && PF03094:Mlo family	-
Solyc08g013950.1.ITAG2.4	114.632	98.3265	67.0662	18.1105	7.61387	8.04973	93.3417	11.258	3.03728	1.05e-11	5.24e-10	Solyc08g013950.1	SL2.50ch08	3451112	3451297	-	114	-	- && - && -	-
Solyc09g011860.2.ITAG2.4	851.971	1902.36	1193.22	228.764	209.925	395.443	1315.85	278.044	2.24223	1.05e-11	5.25e-10	Solyc09g011860.2	SL2.50ch09	5131897	5135504	-	2143	-	- && Q8W486.1 RecName: Full=Uncharacterized protein At1g04910 && PF10250:GDP-fucose protein O-fucosyltransferase	-
Solyc11g072030.1.ITAG2.4	182.635	238.054	142.516	613.851	544.935	477.952	187.735	545.58	-1.54103	1.08e-11	5.39e-10	Solyc11g072030.1	SL2.50ch11	55320539	55323251	-	621	-	- && - && PF14368:Probable lipid transfer	-
Solyc05g011970.2.ITAG2.4	586.762	593.064	258.95	2510.69	1506.46	2755.02	479.592	2257.39	-2.23529	1.09e-11	5.44e-10	Solyc05g011970.2	SL2.50ch05	5179822	5182337	+	1846	-	- && H2DH17.1 RecName: Full=Cytochrome P450 CYP749A22; AltName: Full=Cytochrome P450 CYP749A20 [Panax ginseng] && PF00067:Cytochrome P450	p450
Solyc08g066650.2.ITAG2.4	18.4578	26.9104	13.0407	100.084	95.7172	97.6029	19.4696	97.8015	-2.33765	1.19e-11	5.87e-10	Solyc08g066650.2	SL2.50ch08	55411045	55414119	-	1907	-	- && Q8LIY8.1 RecName: Full=Carotenoid cleavage dioxygenase 8 homolog B, chloroplastic; Short=OsCCD8b; AltName: Full=Protein DWARF-10; AltName: Full=Protein MAX4 homolog; Flags: Precursor && PF03055:Retinal pigment epithelial membrane protein	RPE65
Solyc08g007070.2.ITAG2.4	64.1164	53.8208	30.7387	177.292	226.241	198.224	49.5586	200.586	-2.01915	1.2e-11	5.95e-10	Solyc08g007070.2	SL2.50ch08	1633765	1635965	-	707	-	- && Q9LQL2.2 RecName: Full=Protein NRT1/ PTR FAMILY 7.3; Short=AtNPF7.3; AltName: Full=Nitrate transporter 1.5 && -	-
Solyc02g070130.1.ITAG2.4	199.149	330.17	160.214	36.221	10.877	40.2486	229.844	29.1155	2.97336	1.22e-11	6e-10	Solyc02g070130.1	SL2.50ch02	39951435	39953036	-	1602	-	- && Q9FI21.1 RecName: Full=Berberine bridge enzyme-like 28; Short=AtBBE-like 28; Flags: Precursor && PF01565:FAD binding domain|PF08031:Berberine and berberine like	FAD_binding_4
Solyc05g053400.1.ITAG2.4	85.4885	72.4511	87.5587	253.547	207.75	211.305	81.8328	224.201	-1.45339	1.22e-11	6e-10	Solyc05g053400.1	SL2.50ch05	63498355	63499521	-	1167	-	- && P56725.1 RecName: Full=Zeatin O-xylosyltransferase; AltName: Full=Zeatin O-beta-D-xylosyltransferase && PF00201:UDP-glucoronosyl and UDP-glucosyl transferase	UDPGT
Solyc02g083660.1.ITAG2.4	344.869	379.851	373.522	679.62	879.946	777.805	366.08	779.124	-1.0892	1.22e-11	6e-10	Solyc02g083660.1	SL2.50ch02	46981328	46981828	+	501	-	- && Q9SI09.1 RecName: Full=Probable E3 ubiquitin-protein ligase XERICO && PF13639:Ring finger domain	-
Solyc09g064750.2.ITAG2.4	102.003	91.0814	154.625	0	0	1.00622	115.903	0.335405	8.31853	1.27e-11	6.24e-10	Solyc09g064750.2	SL2.50ch09	62091046	62092954	+	511	-	- && - && -	-
Solyc08g059710.2.ITAG2.4	544.989	586.854	793.617	101.991	106.594	224.386	641.82	144.324	2.15278	1.28e-11	6.25e-10	Solyc08g059710.2	SL2.50ch08	44784776	44788034	-	1803	-	- && - && -	-
Solyc03g083480.2.ITAG2.4	409.956	622.044	1637.53	120.101	121.822	128.796	889.845	123.573	2.84843	1.34e-11	6.54e-10	Solyc03g083480.2	SL2.50ch03	53361485	53362716	+	1138	-	- && - && PF13947:Wall-associated receptor kinase galacturonan-binding	-
Solyc09g089940.1.ITAG2.4	1417.36	1643.6	1307.79	615.757	572.128	760.699	1456.25	649.528	1.16437	1.45e-11	7.04e-10	Solyc09g089940.1	SL2.50ch09	69552396	69554309	+	1914	-	- && Q5UNY4.1 RecName: Full=Uncharacterized protein L728 [Acanthamoeba polyphaga mimivirus] && PF11443:Domain of unknown function (DUF2828)	-
Solyc07g043480.1.ITAG2.4	1148.27	994.65	1008.79	2924.37	3154.32	1978.22	1050.57	2685.64	-1.35401	1.57e-11	7.62e-10	Solyc07g043480.1	SL2.50ch07	57269570	57270940	+	1371	-	- && P56725.1 RecName: Full=Zeatin O-xylosyltransferase; AltName: Full=Zeatin O-beta-D-xylosyltransferase && PF00201:UDP-glucoronosyl and UDP-glucosyl transferase	UDPGT
Solyc04g080850.2.ITAG2.4	7278.18	10507.5	11247.6	3759.36	3959.21	4307.61	9677.74	4008.73	1.27154	1.62e-11	7.83e-10	Solyc04g080850.2	SL2.50ch04	64920744	64923006	-	880	-	- && P29449.1 RecName: Full=Thioredoxin H-type 1; Short=Trx-H1 && PF00085:Thioredoxin	-
Solyc05g050730.1.ITAG2.4	366.241	329.135	298.072	651.978	654.793	690.264	331.149	665.678	-1.00767	1.63e-11	7.85e-10	Solyc05g050730.1	SL2.50ch05	60858207	60858671	+	465	-	- && Q9FLQ0.1 RecName: Full=Stigma-specific STIG1-like protein 2; Flags: Precursor && PF04885:Stigma-specific protein, Stig1	-
Solyc01g103510.2.ITAG2.4	1085.12	1192.34	1245.38	2418.23	2885.66	2129.15	1174.28	2477.68	-1.07702	1.67e-11	8.03e-10	Solyc01g103510.2	SL2.50ch01	92098923	92103598	-	1614	-	- && P22738.4 RecName: Full=60S ribosomal protein L3-2 && PF00297:Ribosomal protein L3	-
Solyc03g006130.2.ITAG2.4	2752.15	2683.8	2058.56	981.78	765.738	1167.21	2498.17	971.576	1.3621	1.82e-11	8.73e-10	Solyc03g006130.2	SL2.50ch03	782748	790090	-	2819	-	- && C0LGQ4.1 RecName: Full=Protein MALE DISCOVERER 2; Short=AtMDIS2; AltName: Full=Probable LRR receptor-like serine/threonine-protein kinase MRH1; AltName: Full=Protein MORPHOGENESIS OF ROOT HAIR 1; Flags: Precursor && PF08263:Leucine rich repeat N-terminal domain|PF07714:Protein tyrosine kinase|PF13855:Leucine rich repeat	Pkinase_Tyr
Solyc06g074620.2.ITAG2.4	249.665	516.473	511.38	82.927	68.5248	120.746	425.839	90.7326	2.22958	1.87e-11	8.97e-10	Solyc06g074620.2	SL2.50ch06	46152957	46154118	+	1004	-	- && - && -	-
Solyc04g082500.2.ITAG2.4	1395.99	1917.88	1848.05	436.558	283.888	651.022	1720.64	457.156	1.91166	1.89e-11	9.06e-10	Solyc04g082500.2	SL2.50ch04	66152655	66156822	-	1489	-	- && P27450.2 RecName: Full=Probable serine/threonine-protein kinase Cx32, chloroplastic; Flags: Precursor && PF07714:Protein tyrosine kinase	Pkinase_Tyr
Solyc07g022910.2.ITAG2.4	2422.82	2590.64	1724.16	724.42	537.322	930.75	2245.88	730.83	1.61924	1.9e-11	9.08e-10	Solyc07g022910.2	SL2.50ch07	23226837	23229990	-	2894	-	- && O48724.1 RecName: Full=Protein WEAK CHLOROPLAST MOVEMENT UNDER BLUE LIGHT 1; Short=Protein WEB1 && PF05701:Weak chloroplast movement under blue light	-
Solyc07g062480.1.ITAG2.4	55.3733	63.136	213.308	4.76592	7.61387	3.01865	110.606	5.13281	4.4405	1.99e-11	9.47e-10	Solyc07g062480.1	SL2.50ch07	65201305	65202198	-	894	-	- && Q39688.1 RecName: Full=Epidermis-specific secreted glycoprotein EP1; AltName: Full=52/54 kDa medium protein; Flags: Precursor && PF01453:D-mannose binding lectin	B_lectin
Solyc03g095610.2.ITAG2.4	1021.98	1151.97	1737.2	455.622	397.009	498.077	1303.72	450.236	1.5338	2.03e-11	9.6e-10	Solyc03g095610.2	SL2.50ch03	56790230	56793639	+	2989	-	- && Q9FHK4.1 RecName: Full=Protein ENHANCED DISEASE RESISTANCE 4 && PF11331:Probable zinc-ribbon domain	-
Solyc03g111310.2.ITAG2.4	3162.1	3385.54	2638.87	1374.49	1260.64	1629.06	3062.17	1421.4	1.10702	2.03e-11	9.6e-10	Solyc03g111310.2	SL2.50ch03	61925775	61930389	+	1559	-	- && Q8LBB2.2 RecName: Full=SNF1-related protein kinase regulatory subunit gamma-1; Short=AKIN subunit gamma-1; Short=AKING1; Short=AKINgamma1; AltName: Full=CBS domain-containing protein CBSCBS1 && PF00571:CBS domain	CBS
Solyc03g116890.2.ITAG2.4	2005.09	1745.04	2323.1	20.0169	38.0693	128.796	2024.41	62.2939	5.02235	2.13e-11	1e-09	Solyc03g116890.2	SL2.50ch03	66139861	66142290	-	1434	-	- && Q9SAH7.1 RecName: Full=Probable WRKY transcription factor 40; AltName: Full=WRKY DNA-binding protein 40 && PF03106:WRKY DNA -binding domain	WRKY
Solyc07g007240.2.ITAG2.4	1896.29	1973.77	2266.28	722.514	914.752	1046.46	2045.45	894.577	1.19349	2.14e-11	1.01e-09	Solyc07g007240.2	SL2.50ch07	1983917	1984868	+	458	-	- && P01075.1 RecName: Full=Metallocarboxypeptidase inhibitor; Short=Carboxypeptidase inhibitor; Short=MCPI && -	-
Solyc01g109010.2.ITAG2.4	172.92	196.653	140.653	40.9869	40.2447	59.3667	170.075	46.8661	1.85783	2.17e-11	1.01e-09	Solyc01g109010.2	SL2.50ch01	96099638	96102136	-	1150	-	- && - && -	-
Solyc04g054890.2.ITAG2.4	2873.58	2959.11	3119.51	1437.4	1167.1	1641.14	2984.07	1415.21	1.07601	2.27e-11	1.06e-09	Solyc04g054890.2	SL2.50ch04	53359221	53363797	-	2322	-	- && O65201.2 RecName: Full=Acyl-coenzyme A oxidase 2, peroxisomal; Short=AOX 2; AltName: Full=Long-chain acyl-CoA oxidase; Short=AtCX2; Flags: Precursor && PF00441:Acyl-CoA dehydrogenase, C-terminal domain|PF01756:Acyl-CoA oxidase|PF02770:Acyl-CoA dehydrogenase, middle domain	-
Solyc01g109140.2.ITAG2.4	1940.01	3149.55	1766.08	814.973	623.249	781.83	2285.21	740.017	1.62626	2.33e-11	1.08e-09	Solyc01g109140.2	SL2.50ch01	96192624	96194463	+	1692	-	- && Q9FPM6.1 RecName: Full=9-divinyl ether synthase; Short=LeDES; AltName: Full=Colneleate synthase; AltName: Full=Cytochrome P450 74D1 && PF00067:Cytochrome P450	p450
Solyc07g043390.2.ITAG2.4	3626.46	3467.3	3832.09	9080.03	8871.24	6329.1	3641.95	8093.46	-1.15201	2.53e-11	1.17e-09	Solyc07g043390.2	SL2.50ch07	57106595	57109536	+	1922	-	- && Q0WVN5.2 RecName: Full=Cellulose synthase-like protein G3; Short=AtCslG3 && PF03552:Cellulose synthase	-
Solyc03g114360.2.ITAG2.4	421.614	497.843	1120.57	101.991	90.2787	160.995	680.007	117.755	2.52962	2.55e-11	1.18e-09	Solyc03g114360.2	SL2.50ch03	64368999	64371205	-	1749	-	- && Q9FJJ3.1 RecName: Full=Probable inactive poly [ADP-ribose] polymerase SRO5; AltName: Full=Protein SIMILAR TO RCD ONE 5 && PF12174:RCD1-SRO-TAF4 (RST) plant domain	-
Solyc12g098110.1.ITAG2.4	12.629	9.31514	4.65738	75.3016	116.383	58.3605	8.86717	83.3485	-3.23646	2.74e-11	1.27e-09	Solyc12g098110.1	SL2.50ch12	65757317	65757769	-	453	-	- && - && PF05938:Plant self-incompatibility protein S1	Self-incomp_S1
Solyc12g096960.1.ITAG2.4	68.9737	74.5211	90.3531	9.53184	14.14	16.0995	77.9493	13.2571	2.56196	2.9e-11	1.33e-09	Solyc12g096960.1	SL2.50ch12	65664355	65665560	+	477	-	- && P17642.1 RecName: Full=Pathogenesis-related protein STH-2 && PF00407:Pathogenesis-related protein Bet v I family	-
Solyc03g115040.2.ITAG2.4	156.405	127.307	251.498	40.0337	36.9816	41.2548	178.404	39.4234	2.1786	2.91e-11	1.34e-09	Solyc03g115040.2	SL2.50ch03	64882651	64884482	+	1481	-	- && P13917.2 RecName: Full=Basic 7S globulin; AltName: Full=SBg7S; Short=Bg; Contains: RecName: Full=Basic 7S globulin high kDa subunit; Contains: RecName: Full=Basic 7S globulin low kDa subunit; Flags: Precursor && PF14541:Xylanase inhibitor C-terminal|PF14543:Xylanase inhibitor N-terminal	-
Solyc02g076830.1.ITAG2.4	798.541	1217.18	1672.93	381.274	344.799	387.393	1229.55	371.155	1.72797	3e-11	1.38e-09	Solyc02g076830.1	SL2.50ch02	41947768	41949078	-	1311	-	- && Q39688.1 RecName: Full=Epidermis-specific secreted glycoprotein EP1; AltName: Full=52/54 kDa medium protein; Flags: Precursor && PF01453:D-mannose binding lectin	B_lectin
Solyc03g082530.1.ITAG2.4	179.72	338.45	525.352	50.5188	46.7709	77.4786	347.841	58.2561	2.57762	3.18e-11	1.45e-09	Solyc03g082530.1	SL2.50ch03	52461138	52461506	-	369	-	- && Q9ZUZ3.1 RecName: Full=Auxin-responsive protein SAUR32; AltName: Full=Protein ABOLISHED APICAL HOOK MAINTENANCE 1; AltName: Full=Protein SMALL AUXIN UP RNA 32 && PF02519:Auxin responsive protein	Auxin_inducible
Solyc07g022900.2.ITAG2.4	22.3436	17.5953	13.0407	100.084	88.1033	209.293	17.6598	132.494	-2.90958	3.21e-11	1.46e-09	Solyc07g022900.2	SL2.50ch07	23224809	23226448	+	1089	-	- && Q9C639.1 RecName: Full=Photosystem I chlorophyll a/b-binding protein 5, chloroplastic; Short=Lhca5; AltName: Full=LHCI type III LHCA5; Flags: Precursor && PF00504:Chlorophyll A-B binding protein	-
Solyc04g005810.2.ITAG2.4	43.7157	65.206	45.6423	160.135	194.697	158.982	51.5213	171.272	-1.73565	3.22e-11	1.46e-09	Solyc04g005810.2	SL2.50ch04	523131	523878	+	598	-	- && Q38879.2 RecName: Full=Thioredoxin H2; Short=AtTrxh2; AltName: Full=Thioredoxin 2; Short=AtTRX2 && PF00085:Thioredoxin	-
Solyc09g059430.2.ITAG2.4	561.504	734.861	800.138	224.951	188.171	304.883	698.834	239.335	1.54527	3.48e-11	1.58e-09	Solyc09g059430.2	SL2.50ch09	54430655	54433629	+	1049	-	- && Q8GYN5.1 RecName: Full=RPM1-interacting protein 4 && PF05627:Cleavage site for pathogenic type III effector avirulence factor Avr	-
Solyc02g082770.2.ITAG2.4	93.2602	114.887	154.625	19.0637	26.1047	30.1865	120.924	25.1183	2.27121	3.74e-11	1.69e-09	Solyc02g082770.2	SL2.50ch02	46422239	46426776	+	958	-	- && Q9C5G5.1 RecName: Full=Phosphoinositide phosphatase SAC7; Short=AtSAC7; AltName: Full=Protein ROOT HAIR DEFECTIVE 4; AltName: Full=Protein SUPPRESSOR OF ACTIN 1C; Short=AtSAC1c; AltName: Full=Protein SUPPRESSOR OF ACTIN 7; AltName: Full=SAC domain protein 7; AltName: Full=SAC1-like protein AtSAC1c && -	-
Solyc05g009470.2.ITAG2.4	985.061	1005	684.635	2536.42	1915.43	2196.57	891.565	2216.14	-1.31411	3.84e-11	1.73e-09	Solyc05g009470.2	SL2.50ch05	3636010	3643963	-	3232	-	- && Q9S7Y7.1 RecName: Full=Alpha-xylosidase 1; Flags: Precursor && PF01055:Glycosyl hydrolases family 31|PF16863:N-terminal barrel of NtMGAM and CtMGAM, maltase-glucoamylase	Glyco_hydro_31
Solyc02g082070.2.ITAG2.4	1358.1	1424.18	1109.39	494.703	401.36	627.879	1297.22	507.98	1.35195	3.85e-11	1.73e-09	Solyc02g082070.2	SL2.50ch02	45801962	45804748	+	1722	-	- && A6YIH8.1 RecName: Full=Premnaspirodiene oxygenase; Short=HPO; AltName: Full=Cytochrome P450 71D55 && PF00067:Cytochrome P450	p450
Solyc01g111550.2.ITAG2.4	136.005	116.957	135.995	291.674	394.833	309.914	129.652	332.141	-1.3551	3.97e-11	1.79e-09	Solyc01g111550.2	SL2.50ch01	97780639	97784471	+	1489	-	- && - && PF09329:Primase zinc finger	-
Solyc01g010660.2.ITAG2.4	703.338	478.177	724.688	250.687	243.644	252.56	635.401	248.964	1.35216	4.03e-11	1.81e-09	Solyc01g010660.2	SL2.50ch01	5673997	5680626	+	1837	-	- && O49840.1 RecName: Full=Protein kinase 2B, chloroplastic; Flags: Precursor && PF07714:Protein tyrosine kinase	Pkinase_Tyr
Solyc09g091560.2.ITAG2.4	1754.46	2282.21	1861.09	918.87	1001.77	1011.25	1965.92	977.295	1.00831	4.08e-11	1.83e-09	Solyc09g091560.2	SL2.50ch09	70815235	70821329	+	2417	-	- && Q6NRD0.1 RecName: Full=Ankyrin repeat domain-containing protein 13C-A [Xenopus laevis] && PF11904:GPCR-chaperone	-
Solyc02g082650.2.ITAG2.4	397.327	366.396	385.631	179.199	195.785	182.125	383.118	185.703	1.04585	4.16e-11	1.85e-09	Solyc02g082650.2	SL2.50ch02	46298477	46300068	+	250	-	- && Q7X911.1 RecName: Full=Phosphoinositide phosphatase SAC6; Short=AtSAC6; AltName: Full=Protein IMPAIRED IN BABA-INDUCED STERILITY 2; AltName: Full=Protein SUPPRESSOR OF ACTIN 1B; Short=AtSAC1b; AltName: Full=Protein SUPPRESSOR OF ACTIN 6; AltName: Full=SAC domain protein 6; AltName: Full=SAC1-like protein AtSAC1b && -	-
Solyc01g006310.2.ITAG2.4	1306.61	1311.36	722.825	317.41	366.553	386.387	1113.6	356.784	1.6421	4.18e-11	1.85e-09	Solyc01g006310.2	SL2.50ch01	899147	902371	+	1395	-	- && Q42517.1 RecName: Full=Peroxidase N; AltName: Full=Neutral peroxidase; Flags: Precursor && PF00141:Peroxidase	-
Solyc02g088500.1.ITAG2.4	48.573	60.0309	30.7387	211.607	147.927	255.579	46.4475	205.037	-2.14699	4.31e-11	1.91e-09	Solyc02g088500.1	SL2.50ch02	50573556	50574944	-	1389	-	- && A0A0M4KE44.1 RecName: Full=UDP-glycosyltransferase 13; Short=MiUGT13; AltName: Full=C-glycosyltransferase; Short=MiCGT && PF00201:UDP-glucoronosyl and UDP-glucosyl transferase	UDPGT
Solyc02g081030.2.ITAG2.4	9106.47	9062.6	6124.45	2687.03	2152.55	3549.93	8097.84	2796.5	1.53381	4.44e-11	1.96e-09	Solyc02g081030.2	SL2.50ch02	45084200	45096242	-	2884	-	- && Q5XEZ5.1 RecName: Full=Calcium permeable stress-gated cation channel 1; Short=AtCSC1 && PF02714:Calcium-dependent channel, 7TM region, putative phosphate|PF13967:Late exocytosis, associated with Golgi transport|PF14703:Cytosolic domain of 10TM putative phosphate transporter	-
Solyc10g011810.2.ITAG2.4	1783.6	2635.15	2645.39	986.546	962.61	1053.51	2354.71	1000.89	1.23421	4.46e-11	1.96e-09	Solyc10g011810.2	SL2.50ch10	4042221	4043855	-	1377	-	- && Q9FR82.1 RecName: Full=Delta(8)-fatty-acid desaturase; AltName: Full=Delta(8)-sphingolipid desaturase; AltName: Full=Sphingolipid 8-(E/Z)-desaturase && PF00487:Fatty acid desaturase|PF00173:Cytochrome b5-like Heme/Steroid binding domain	-
Solyc11g073180.1.ITAG2.4	161.262	198.723	166.734	44.7997	51.1217	67.4165	175.573	54.4459	1.68926	4.46e-11	1.96e-09	Solyc11g073180.1	SL2.50ch11	56230523	56231241	-	585	-	- && - && PF07795:Protein of unknown function (DUF1635)	-
Solyc03g098490.1.ITAG2.4	927.745	2015.18	945.448	188.73	176.207	368.275	1296.12	244.404	2.40647	4.49e-11	1.97e-09	Solyc03g098490.1	SL2.50ch03	60771054	60772067	-	1014	-	- && - && -	-
Solyc09g075870.1.ITAG2.4	4724.21	4804.54	3645.8	1780.55	1446.63	2164.37	4391.52	1797.18	1.28878	4.65e-11	2.03e-09	Solyc09g075870.1	SL2.50ch09	67515791	67520233	+	2565	-	- && Q43191.1 RecName: Full=Probable linoleate 9S-lipoxygenase 5; AltName: Full=Leaf lipoxygenase && PF01477:PLAT/LH2 domain|PF00305:Lipoxygenase	Lipoxygenase
Solyc02g084230.1.ITAG2.4	1333.82	1064	1500.61	622.429	600.408	566.499	1299.47	596.446	1.12372	4.72e-11	2.06e-09	Solyc02g084230.1	SL2.50ch02	47389891	47390757	-	867	-	- && Q5VSA8.1 RecName: Full=Barley B recombinant-like protein D; Short=BBR-like protein D; AltName: Full=GAGA-binding transcriptional activator BBR-D && PF06217:GAGA binding protein-like family	-
Solyc01g105970.2.ITAG2.4	1416.39	1272.03	1232.34	629.102	585.18	742.587	1306.92	652.29	1.0023	4.79e-11	2.09e-09	Solyc01g105970.2	SL2.50ch01	93971156	93974931	-	906	-	- && Q9D967.1 RecName: Full=Magnesium-dependent phosphatase 1; Short=MDP-1 && PF12689:Acid Phosphatase	-
Solyc02g062370.2.ITAG2.4	3281.59	1828.87	1853.64	680.574	643.916	854.277	2321.37	726.255	1.67637	5.15e-11	2.24e-09	Solyc02g062370.2	SL2.50ch02	33981723	33984676	+	2676	-	- && Q9SIV5.3 RecName: Full=Zinc finger CCCH domain-containing protein 19; Short=AtC3H19; AltName: Full=Protein Needed for RDR2-independent DNA methylation && -	-
Solyc10g012430.2.ITAG2.4	1506.74	1429.36	987.364	472.779	406.798	575.555	1307.82	485.044	1.43047	5.19e-11	2.25e-09	Solyc10g012430.2	SL2.50ch10	5095597	5108835	-	1966	-	- && Q0WMJ8.1 RecName: Full=Signal peptide peptidase-like 4; Short=AtSPPL4; Flags: Precursor && PF02225:PA domain|PF04258:Signal peptide peptidase	-
Solyc11g008200.1.ITAG2.4	1706.86	2543.03	1169.93	396.525	301.292	586.624	1806.61	428.147	2.07665	5.23e-11	2.26e-09	Solyc11g008200.1	SL2.50ch11	2442694	2444508	-	1815	-	- && - && PF07690:Major Facilitator Superfamily|PF06813:Nodulin-like	MFS_1
Solyc01g100710.2.ITAG2.4	370.127	385.026	407.986	108.663	117.471	180.113	387.713	135.416	1.51768	5.28e-11	2.28e-09	Solyc01g100710.2	SL2.50ch01	90670456	90672340	-	440	-	- && - && -	-
Solyc05g053120.1.ITAG2.4	85.4885	97.2915	109.914	258.313	282.801	223.38	97.5647	254.831	-1.38384	5.82e-11	2.5e-09	Solyc05g053120.1	SL2.50ch05	63229667	63231076	-	1410	-	- && P56725.1 RecName: Full=Zeatin O-xylosyltransferase; AltName: Full=Zeatin O-beta-D-xylosyltransferase && PF00201:UDP-glucoronosyl and UDP-glucosyl transferase	UDPGT
Solyc06g066830.2.ITAG2.4	693.623	810.417	299.004	3475.31	1917.61	3443.27	601.015	2945.4	-2.29344	6.21e-11	2.66e-09	Solyc06g066830.2	SL2.50ch06	42027440	42029331	-	1164	-	- && Q945B6.1 RecName: Full=Probable 2-oxoglutarate-dependent dioxygenase AOP1.2 && PF14226:non-haem dioxygenase in morphine synthesis N-terminal|PF03171:2OG-Fe(II) oxygenase superfamily	2OG-FeII_Oxy
Solyc10g049630.1.ITAG2.4	1096.78	1638.43	1740	164.901	133.787	444.747	1491.74	247.812	2.58934	6.25e-11	2.67e-09	Solyc10g049630.1	SL2.50ch10	46300218	46302853	-	1143	-	- && O81760.1 RecName: Full=Probable protein phosphatase 2C 63; Short=AtPP2C63 && PF00481:Protein phosphatase 2C	PP2C
Solyc06g076630.2.ITAG2.4	1030.72	794.892	717.236	1707.15	2050.31	2009.41	847.616	1922.29	-1.18127	6.84e-11	2.92e-09	Solyc06g076630.2	SL2.50ch06	47592055	47594316	-	1633	-	- && Q9SZB9.2 RecName: Full=Peroxidase 47; Short=Atperox P47; AltName: Full=ATP32; Flags: Precursor && -	-
Solyc03g034020.2.ITAG2.4	419.671	364.326	319.496	116.288	164.242	143.889	367.831	141.473	1.38053	6.89e-11	2.93e-09	Solyc03g034020.2	SL2.50ch03	5725105	5729599	-	2193	-	- && O23225.3 RecName: Full=U-box domain-containing protein 5; AltName: Full=Plant U-box protein 5 && PF04564:U-box domain	U-box
Solyc04g077500.2.ITAG2.4	627.564	542.348	716.305	292.628	296.941	299.852	628.739	296.474	1.08519	7.1e-11	3.02e-09	Solyc04g077500.2	SL2.50ch04	62443833	62450753	-	1312	-	- && - && PF11255:Protein of unknown function (DUF3054)	-
Solyc12g056550.1.ITAG2.4	730.538	1560.8	1192.29	252.594	216.451	390.412	1161.21	286.486	2.01864	7.23e-11	3.06e-09	Solyc12g056550.1	SL2.50ch12	62503898	62505034	+	1137	-	- && - && PF05633:Protein of unknown function (DUF793)	-
Solyc09g010640.2.ITAG2.4	1718.51	1554.59	1428.88	653.884	490.551	779.817	1567.33	641.417	1.28841	7.31e-11	3.09e-09	Solyc09g010640.2	SL2.50ch09	3969447	3971560	-	2036	-	- && - && -	-
Solyc02g093430.2.ITAG2.4	1516.45	1874.41	2476.79	736.811	759.211	849.246	1955.89	781.756	1.32316	7.9e-11	3.33e-09	Solyc02g093430.2	SL2.50ch02	54299900	54302234	-	1848	-	- && - && PF04724:Glycosyltransferase family 17	-
Solyc11g011610.1.ITAG2.4	638.25	678.97	719.099	313.598	318.695	380.35	678.773	337.547	1.00789	7.95e-11	3.34e-09	Solyc11g011610.1	SL2.50ch11	4668220	4670359	-	495	-	- && O64527.1 RecName: Full=UPF0678 fatty acid-binding protein-like protein At1g79260 && PF08768:Domain of unknown function (DUF1794)	-
Solyc09g075580.1.ITAG2.4	43.7157	42.4356	42.8479	162.995	115.296	150.932	42.9998	143.074	-1.73602	7.99e-11	3.35e-09	Solyc09g075580.1	SL2.50ch09	67274238	67274723	+	486	-	- && - && -	-
Solyc07g051850.2.ITAG2.4	21366.3	22639.9	18314.7	10208.6	8932.15	11683.2	20773.6	10274.6	1.01562	8.98e-11	3.75e-09	Solyc07g051850.2	SL2.50ch07	60390005	60395248	+	1833	-	- && O65390.1 RecName: Full=Aspartic proteinase A1; Flags: Precursor && PF05184:Saposin-like type B, region 1|PF00026:Eukaryotic aspartyl protease|PF03489:Saposin-like type B, region 2	Asp
Solyc12g049540.1.ITAG2.4	1660.23	1911.67	1111.25	484.218	371.992	621.841	1561.05	492.684	1.66323	9.65e-11	4.02e-09	Solyc12g049540.1	SL2.50ch12	36700179	36705361	+	2079	-	- && Q94A27.1 RecName: Full=Phosphoinositide phosphatase SAC2; Short=AtSAC2; AltName: Full=Phosphatidylinositol 3,5-bisphosphate 5-phosphatase SAC2; AltName: Full=Protein SUPPRESSOR OF ACTIN 2; AltName: Full=SAC domain protein 2 && PF02383:SacI homology domain	-
Solyc05g053100.2.ITAG2.4	119.49	111.782	121.092	40.0337	30.4555	33.2051	117.454	34.5648	1.76121	9.73e-11	4.04e-09	Solyc05g053100.2	SL2.50ch05	63216915	63224531	+	2109	-	- && A8MS68.1 RecName: Full=Dihydrolipoyl dehydrogenase 1, chloroplastic; Short=ptLPD1; AltName: Full=Dihydrolipoamide dehydrogenase 1; AltName: Full=Protein LIPOAMIDE DEHYDROGENASE 1; AltName: Full=Pyruvate dehydrogenase complex E3 subunit 1; Short=E3-1; Short=PDC-E3 1; Flags: Precursor && PF02852:Pyridine nucleotide-disulphide oxidoreductase, dimerisation domain|PF07992:Pyridine nucleotide-disu…	Pyr_redox_2
Solyc02g091730.1.ITAG2.4	465.33	322.925	432.205	164.901	163.154	167.032	406.82	165.029	1.30226	9.89e-11	4.09e-09	Solyc02g091730.1	SL2.50ch02	52975183	52977573	+	1059	-	- && - && -	-
Solyc07g043500.1.ITAG2.4	1233.76	1132.31	1077.72	2918.65	2965.06	2018.47	1147.93	2634.06	-1.19825	1e-10	4.12e-09	Solyc07g043500.1	SL2.50ch07	57337700	57339025	+	1326	-	- && F8WKW8.1 RecName: Full=Beta-D-glucosyl crocetin beta-1,6-glucosyltransferase; AltName: Full=UDP-glucose glucosyltransferase 9; Short=GjUGT9; AltName: Full=UDP-glycosyltransferase 94E5 && PF00201:UDP-glucoronosyl and UDP-glucosyl transferase	UDPGT
Solyc04g040210.2.ITAG2.4	612.992	562.013	938.927	205.888	259.959	259.604	704.644	241.817	1.54408	1.13e-10	4.65e-09	Solyc04g040210.2	SL2.50ch04	11940375	11941573	+	568	-	- && - && -	-
Solyc02g082270.2.ITAG2.4	1939.04	2004.83	2559.69	632.914	518.831	984.079	2167.85	711.941	1.60625	1.19e-10	4.88e-09	Solyc02g082270.2	SL2.50ch02	45973477	45977943	+	1362	-	- && Q76LC6.1 RecName: Full=RNA-binding protein 24; AltName: Full=RNA-binding motif protein 24; AltName: Full=RNA-binding protein SEB-4 && PF00076:RNA recognition motif. (a.k.a. RRM, RBD, or RNP domain)	RRM_1
Solyc10g052600.1.ITAG2.4	833.513	662.41	571.926	1684.28	1623.93	1387.57	689.283	1565.26	-1.18337	1.19e-10	4.88e-09	Solyc10g052600.1	SL2.50ch10	52955097	52956290	-	1194	-	- && - && PF03141:Putative S-adenosyl-L-methionine-dependent methyltransferase	-
Solyc06g083210.2.ITAG2.4	1086.09	1112.64	1379.52	469.92	459.007	622.848	1192.75	517.258	1.20535	1.21e-10	4.94e-09	Solyc06g083210.2	SL2.50ch06	48727429	48733473	+	1796	-	- && P43294.2 RecName: Full=Serine/threonine-protein kinase MHK && PF00069:Protein kinase domain	Pkinase
Solyc04g007250.1.ITAG2.4	160.291	500.948	658.553	44.7997	60.9109	76.4724	439.931	60.7277	2.8577	1.22e-10	5e-09	Solyc04g007250.1	SL2.50ch04	974309	975106	-	798	-	- && - && -	-
Solyc06g072460.1.ITAG2.4	945.231	834.223	1073.99	183.965	197.961	394.437	951.148	258.787	1.8779	1.24e-10	5.03e-09	Solyc06g072460.1	SL2.50ch06	44695610	44696722	+	1113	-	- && - && PF07649:C1-like domain	C1_3
Solyc03g098240.2.ITAG2.4	59.2591	60.0309	78.2439	6.67229	7.61387	13.0808	65.8447	9.12232	2.85313	1.24e-10	5.03e-09	Solyc03g098240.2	SL2.50ch03	60597006	60601439	+	1780	-	- && P54767.1 RecName: Full=Glutamate decarboxylase; Short=GAD; AltName: Full=ERT D1 && PF00282:Pyridoxal-dependent decarboxylase conserved domain	-
Solyc03g097990.2.ITAG2.4	623.678	617.904	677.183	321.223	344.799	266.647	639.588	310.89	1.04148	1.27e-10	5.13e-09	Solyc03g097990.2	SL2.50ch03	60350968	60355505	-	1065	-	- && Q6PC19.1 RecName: Full=RNA polymerase II subunit A C-terminal domain phosphatase SSU72; Short=CTD phosphatase SSU72 && PF04722:Ssu72-like protein	-
Solyc03g118810.1.ITAG2.4	1017.12	3188.88	2735.74	255.453	377.43	564.487	2313.92	399.124	2.53555	1.28e-10	5.15e-09	Solyc03g118810.1	SL2.50ch03	67623231	67623725	+	495	-	- && Q9M7R0.1 RecName: Full=Calcium-binding allergen Ole e 8; AltName: Full=PCA18/PCA23; AltName: Allergen=Ole e 8 && PF13499:EF-hand domain pair	-
Solyc09g065160.2.ITAG2.4	245.78	215.283	300.867	92.4589	94.6295	101.628	253.976	96.2387	1.40115	1.33e-10	5.34e-09	Solyc09g065160.2	SL2.50ch09	63069497	63082673	-	2572	-	- && Q1KPV0.1 RecName: Full=Probable transmembrane GTPase FZO-like, chloroplastic; Flags: Precursor && PF01926:50S ribosome-binding GTPase|PF02581:Thiamine monophosphate synthase/TENI	-
Solyc09g089930.1.ITAG2.4	73.831	140.762	321.359	4.76592	8.70156	22.1367	178.651	11.8681	3.91397	1.35e-10	5.41e-09	Solyc09g089930.1	SL2.50ch09	69543443	69544165	+	723	-	- && Q8LDC8.2 RecName: Full=Ethylene-responsive transcription factor 1B; Short=AtERF1B; AltName: Full=Ethylene-responsive element-binding factor 1B; Short=EREBP-1B && PF00847:AP2 domain	AP2
Solyc10g080610.1.ITAG2.4	1920.58	2422.97	2039	713.935	801.631	1099.79	2127.52	871.787	1.2871	1.38e-10	5.55e-09	Solyc10g080610.1	SL2.50ch10	61841593	61842627	+	1035	-	- && O80582.2 RecName: Full=F-box/kelch-repeat protein At2g44130 && PF01344:Kelch motif	Kelch_1
Solyc06g069190.2.ITAG2.4	1414.45	1589.78	1585.37	644.353	541.672	824.091	1529.87	670.039	1.19069	1.39e-10	5.56e-09	Solyc06g069190.2	SL2.50ch06	42957830	42962777	-	2008	-	- && Q9M9A8.1 RecName: Full=Aspartyl protease APCB1; AltName: Full=Aspartyl protease cleaving BAG 1 && PF14543:Xylanase inhibitor N-terminal|PF14541:Xylanase inhibitor C-terminal	-
Solyc11g012130.1.ITAG2.4	97.1461	99.3615	101.531	324.083	318.695	211.305	99.3461	284.694	-1.51868	1.4e-10	5.58e-09	Solyc11g012130.1	SL2.50ch11	5057082	5059179	+	519	-	- && - && PF02298:Plastocyanin-like domain	Cu_bind_like
Solyc02g071820.2.ITAG2.4	40.8014	57.9609	69.8607	5.71911	4.35078	6.03729	56.2076	5.36906	3.38286	1.41e-10	5.62e-09	Solyc02g071820.2	SL2.50ch02	41169272	41178174	-	3165	-	- && C0LGG8.1 RecName: Full=Probable LRR receptor-like serine/threonine-protein kinase At1g53430; Flags: Precursor && PF11721:Di-glucose binding within endoplasmic reticulum|PF07714:Protein tyrosine kinase|PF13855:Leucine rich repeat	Pkinase_Tyr
Solyc11g068770.1.ITAG2.4	812.141	1015.35	1184.84	130.586	209.925	359.219	1004.11	233.243	2.10645	1.42e-10	5.65e-09	Solyc11g068770.1	SL2.50ch11	53407077	53407934	+	858	-	- && Q9FMS6.1 RecName: Full=Probable CCR4-associated factor 1 homolog 11 && PF04857:CAF1 family ribonuclease	CAF1
Solyc08g007610.1.ITAG2.4	279.781	190.443	152.762	748.25	562.339	591.655	207.662	634.081	-1.61102	1.44e-10	5.71e-09	Solyc08g007610.1	SL2.50ch08	2149473	2151776	+	2304	-	- && O65351.1 RecName: Full=Subtilisin-like protease SBT1.7; AltName: Full=Cucumisin-like serine protease; AltName: Full=Subtilase subfamily 1 member 7; Short=AtSBT1.7; AltName: Full=Subtilisin-like serine protease 1; Short=At-SLP1; Flags: Precursor && PF02225:PA domain|PF00082:Subtilase family|PF05922:Peptidase inhibitor I9	Peptidase_S8
Solyc03g097420.2.ITAG2.4	75.7739	80.7312	94.079	274.517	324.133	193.193	83.5281	263.948	-1.65845	1.45e-10	5.75e-09	Solyc03g097420.2	SL2.50ch03	59747259	59748433	+	637	-	- && Q9FED2.1 RecName: Full=HVA22-like protein e; Short=AtHVA22e && PF03134:TB2/DP1, HVA22 family	TB2_DP1_HVA22
Solyc03g116340.2.ITAG2.4	924.831	563.049	982.707	266.892	246.907	322.995	823.529	278.931	1.56203	1.5e-10	5.96e-09	Solyc03g116340.2	SL2.50ch03	65821345	65824736	+	1357	-	- && Q9SN74.1 RecName: Full=Transcription factor bHLH47; AltName: Full=Basic helix-loop-helix protein 47; Short=AtbHLH47; Short=bHLH 47; AltName: Full=Protein POPEYE; AltName: Full=Transcription factor EN 139; AltName: Full=bHLH transcription factor bHLH047 && -	-
Solyc01g094920.2.ITAG2.4	2837.64	3809.89	3399.89	1339.22	1250.85	1758.87	3349.14	1449.65	1.20795	1.54e-10	6.1e-09	Solyc01g094920.2	SL2.50ch01	86325634	86327388	-	1755	-	- && Q9FLW0.1 RecName: Full=Probable receptor-like protein kinase At5g24010; Flags: Precursor && PF12819:Carbohydrate-binding protein of the ER	-
Solyc03g116680.2.ITAG2.4	863.629	888.043	1172.73	335.521	420.938	459.841	974.8	405.433	1.26639	1.63e-10	6.46e-09	Solyc03g116680.2	SL2.50ch03	65986938	65989726	+	1525	-	- && Q9LW00.1 RecName: Full=Methyl-CpG-binding domain-containing protein 11; Short=AtMBD11; Short=MBD11; AltName: Full=Methyl-CpG-binding protein MBD11 && PF01429:Methyl-CpG binding domain	MBD
Solyc08g080720.2.ITAG2.4	571.219	626.184	675.32	1238.19	1441.2	1110.86	624.241	1263.41	-1.01676	1.79e-10	7.04e-09	Solyc08g080720.2	SL2.50ch08	63934501	63935420	-	648	-	- && - && -	-
Solyc09g089620.1.ITAG2.4	1799.15	2000.69	1181.11	624.336	452.481	655.046	1660.31	577.288	1.52348	1.81e-10	7.14e-09	Solyc09g089620.1	SL2.50ch09	69380798	69381658	-	861	-	- && Q8GWQ2.1 RecName: Full=AT-hook motif nuclear-localized protein 20 && PF03479:Domain of unknown function (DUF296)	-
Solyc02g090770.1.ITAG2.4	82.5742	41.4006	67.9977	0	2.17539	1.00622	63.9908	1.06054	5.97519	1.82e-10	7.16e-09	Solyc02g090770.1	SL2.50ch02	52280739	52281350	-	612	-	- && Q70II3.2 RecName: Full=Ethylene-responsive transcription factor ERF110 && PF00847:AP2 domain	AP2
Solyc03g097020.2.ITAG2.4	758.711	659.305	883.97	1864.43	2184.09	1466.06	767.329	1838.19	-1.25991	1.91e-10	7.49e-09	Solyc03g097020.2	SL2.50ch03	59373389	59379939	-	2276	-	- && Q6PAX2.1 RecName: Full=ATPase family AAA domain-containing protein 3-B [Xenopus laevis] && PF00004:ATPase family associated with various cellular activities (AAA)|PF12037:Domain of unknown function (DUF3523)	AAA
Solyc07g006280.2.ITAG2.4	5629.61	8136.26	13699.2	1527	1547.79	2943.18	9155.03	2005.99	2.19025	1.98e-10	7.72e-09	Solyc07g006280.2	SL2.50ch07	1069324	1072745	+	1609	-	- && Q8S8Q6.1 RecName: Full=Tetraspanin-8 && PF00335:Tetraspanin family	Tetraspannin
Solyc01g079200.2.ITAG2.4	414.814	531.998	1013.45	122.008	98.9803	186.15	653.419	135.713	2.26711	1.98e-10	7.73e-09	Solyc01g079200.2	SL2.50ch01	78282910	78286020	-	1155	-	- && Q9XHM5.1 RecName: Full=Gibberellin 2-beta-dioxygenase 2; AltName: Full=GA 2-oxidase 2; AltName: Full=Gibberellin 2-beta-hydroxylase 2; AltName: Full=Gibberellin 2-oxidase 2 && PF14226:non-haem dioxygenase in morphine synthesis N-terminal|PF03171:2OG-Fe(II) oxygenase superfamily	2OG-FeII_Oxy
Solyc03g007890.2.ITAG2.4	31.0867	25.8754	26.0813	117.242	97.8926	93.5781	27.6812	102.904	-1.89498	2e-10	7.79e-09	Solyc03g007890.2	SL2.50ch03	2410871	2414110	-	2621	-	- && P51819.1 RecName: Full=Heat shock protein 83 && PF00183:Hsp90 protein|PF02518:Histidine kinase-, DNA gyrase B-, and HSP90-like ATPase	HATPase_c
Solyc01g108220.2.ITAG2.4	101.032	48.6457	40.0534	0	3.26309	2.01243	63.2437	1.75851	5.21377	2e-10	7.8e-09	Solyc01g108220.2	SL2.50ch01	95575286	95577526	-	126	-	- && - && -	-
Solyc02g091500.1.ITAG2.4	1173.52	2090.73	1821.97	277.377	229.504	588.636	1695.41	365.172	2.21468	2.01e-10	7.81e-09	Solyc02g091500.1	SL2.50ch02	52780166	52780636	+	471	-	- && - && PF13499:EF-hand domain pair	-
Solyc08g082210.2.ITAG2.4	60.2306	157.322	114.571	5.71911	6.52617	19.1181	110.708	10.4545	3.40294	2.2e-10	8.53e-09	Solyc08g082210.2	SL2.50ch08	65055339	65056646	-	1253	-	- && Q9C7W2.1 RecName: Full=Ethylene-responsive transcription factor ERF061 && PF00847:AP2 domain	AP2
Solyc01g111250.2.ITAG2.4	241.894	719.336	793.617	106.757	102.243	118.733	584.949	109.244	2.42059	2.21e-10	8.55e-09	Solyc01g111250.2	SL2.50ch01	97564438	97565803	+	1287	-	- && - && PF00388:Phosphatidylinositol-specific phospholipase C, X domain	PI-PLC-X
Solyc12g087960.1.ITAG2.4	324.468	528.893	457.355	144.884	122.91	176.088	436.905	147.96	1.56092	2.24e-10	8.62e-09	Solyc12g087960.1	SL2.50ch12	63461174	63463127	+	513	-	- && - && -	-
Solyc05g053080.2.ITAG2.4	282.695	302.225	339.057	144.884	139.225	119.74	307.992	134.616	1.19421	2.27e-10	8.73e-09	Solyc05g053080.2	SL2.50ch05	63208610	63211026	+	620	-	- && - && -	-
Solyc10g050670.1.ITAG2.4	121.433	76.5912	88.4902	7.62547	0	14.087	95.5046	7.2375	3.705	2.34e-10	8.99e-09	Solyc10g050670.1	SL2.50ch10	50352624	50352989	+	99	-	- && - && -	-
Solyc07g052020.1.ITAG2.4	67.0308	18.6303	137.858	0	0	0	74.5065	0	8.64312	2.47e-10	9.46e-09	Solyc07g052020.1	SL2.50ch07	60560492	60563293	+	1341	-	- && P31244.1 RecName: Full=DNA repair protein RAD16; AltName: Full=ATP-dependent helicase RAD16 && PF00176:SNF2 family N-terminal domain	SNF2_N
Solyc04g028380.1.ITAG2.4	8.74315	23.8054	6.52033	130.586	117.471	73.4537	13.0229	107.17	-3.05431	2.51e-10	9.59e-09	Solyc04g028380.1	SL2.50ch04	16336410	16337357	-	948	-	- && Q8L5A7.1 RecName: Full=Cytosolic sulfotransferase 15; Short=AtSOT15; AltName: Full=Sulfotransferase 2a; Short=AtST2a && PF00685:Sulfotransferase domain	Sulfotransfer_1
Solyc11g010990.1.ITAG2.4	268.123	297.049	186.295	1346.85	663.494	762.712	250.489	924.352	-1.88473	2.56e-10	9.74e-09	Solyc11g010990.1	SL2.50ch11	4026527	4029450	-	1080	-	- && Q6V4H0.1 RecName: Full=8-hydroxygeraniol dehydrogenase; Short=Cr10HGO && PF00107:Zinc-binding dehydrogenase|PF08240:Alcohol dehydrogenase GroES-like domain	ADH_N
Solyc01g080600.2.ITAG2.4	520.703	398.481	651.101	1349.71	1829.5	1213.5	523.428	1464.24	-1.48331	2.58e-10	9.83e-09	Solyc01g080600.2	SL2.50ch01	79838813	79839487	+	675	-	- && P59226.2 RecName: Full=Histone H3.2; AltName: Full=Histone H3.1 >P69246.2 RecName: Full=Histone H3.2 >P69248.2 RecName: Full=Histone H3.2 >Q71T45.3 RecName: Full=Histone H3.2 >Q6LBE3.3 RecName: Full=Histone H3.2 >Q6LCK1.3 RecName: Full=Histone H3.2 >Q76MV0.1 RecName: Full=Histone H3.2 >Q2RAD9.1 RecName: Full=Histone H3.2 >A2Y533.1 RecName: Full=Histone H3.2 && PF00125:Core histone H2A/H2B/H3…	Histone
Solyc05g054050.2.ITAG2.4	2699.69	3483.86	2705.01	1486.01	1121.41	1448.95	2962.85	1352.13	1.13136	2.78e-10	1.05e-08	Solyc05g054050.2	SL2.50ch05	64027583	64031435	-	1661	-	- && Q07346.1 RecName: Full=Glutamate decarboxylase; Short=GAD && PF00282:Pyridoxal-dependent decarboxylase conserved domain	-
Solyc10g054910.1.ITAG2.4	46.6301	40.3656	31.6702	140.118	188.171	117.727	39.5553	148.672	-1.91032	2.88e-10	1.09e-08	Solyc10g054910.1	SL2.50ch10	56066221	56066739	+	519	-	- && P21568.1 RecName: Full=Peptidyl-prolyl cis-trans isomerase; Short=PPIase; AltName: Full=Cyclophilin; AltName: Full=Cyclosporin A-binding protein; AltName: Full=Rotamase && PF00160:Cyclophilin type peptidyl-prolyl cis-trans isomerase/CLD	Pro_isomerase
Solyc02g055380.1.ITAG2.4	51.4874	37.2606	46.5738	0	0	0	45.1073	0	7.9185	3e-10	1.13e-08	Solyc02g055380.1	SL2.50ch02	3229719	3229874	+	156	-	- && - && -	-
Solyc07g052010.1.ITAG2.4	51.4874	24.8404	107.12	0	0	0	61.1492	0	8.35849	3.13e-10	1.18e-08	Solyc07g052010.1	SL2.50ch07	60554508	60559320	+	1125	-	- && P31244.1 RecName: Full=DNA repair protein RAD16; AltName: Full=ATP-dependent helicase RAD16 && PF00176:SNF2 family N-terminal domain	SNF2_N
Solyc05g005070.2.ITAG2.4	2293.62	3478.69	3179.13	1173.37	879.946	1354.37	2983.81	1135.89	1.39305	3.16e-10	1.19e-08	Solyc05g005070.2	SL2.50ch05	74921	78722	+	2434	-	- && Q9CAL3.1 RecName: Full=Cysteine-rich receptor-like protein kinase 2; Short=Cysteine-rich RLK2; Flags: Precursor && PF01657:Salt stress response/antifungal|PF07714:Protein tyrosine kinase	Pkinase_Tyr
Solyc04g017690.2.ITAG2.4	6363.07	7975.83	6755.06	3100.71	3195.65	4020.84	7031.32	3439.07	1.03174	3.24e-10	1.22e-08	Solyc04g017690.2	SL2.50ch04	7761810	7762863	-	854	-	- && Q39096.1 RecName: Full=Protein EARLY RESPONSIVE TO DEHYDRATION 15; AltName: Full=PAM2-containing protein CID1; AltName: Full=Polyadenylate-binding protein-interacting protein 1; Short=PABP-interacting protein 1; Short=Poly(A)-binding protein-interacting protein 1; AltName: Full=Protein CTC-INTERACTING DOMAIN 1; AltName: Full=Protein LIGHT STRESS-REGULATED 1 && PF07145:Ataxin-2 C-terminal reg…	PAM2
Solyc01g108440.2.ITAG2.4	259.38	375.711	363.275	137.259	105.506	127.789	332.789	123.518	1.42797	3.42e-10	1.28e-08	Solyc01g108440.2	SL2.50ch01	95770295	95771580	-	1286	-	- && - && PF07816:Protein of unknown function (DUF1645)	-
Solyc07g018300.2.ITAG2.4	408.014	328.1	392.151	950.325	975.663	691.27	376.088	872.419	-1.2134	3.49e-10	1.3e-08	Solyc07g018300.2	SL2.50ch07	10037245	10042545	-	1180	-	- && Q9ZQ19.2 RecName: Full=Replication protein A 32 kDa subunit A; Short=AtRPA32A; Short=RP-A p32 A; AltName: Full=DNA replication protein A2 subunit A; AltName: Full=Protein SUPPRESSOR OF ROS1; AltName: Full=Replication factor A protein 2 A; Short=AtRPA2 A; Short=RF-A protein 2 A; AltName: Full=Replicon protein A2 A && PF01336:OB-fold nucleic acid binding domain|PF08784:Replication protein A C …	tRNA_anti
Solyc09g005120.2.ITAG2.4	173.891	158.357	225.417	422.261	411.149	480.971	185.889	438.127	-1.23546	3.5e-10	1.3e-08	Solyc09g005120.2	SL2.50ch09	70252	75607	-	2155	-	- && Q9SR96.1 RecName: Full=DnaJ protein ERDJ3A; AltName: Full=Chaperone protein dnaJ 63; Short=AtDjA63; Short=AtJ63; AltName: Full=Endoplasmic reticulum dnaJ domain-containing protein 3A; Short=AtERdj3A; AltName: Full=Protein SCJ1 homolog ERDJ3A; AltName: Full=THERMOSENSITIVE MALE STERILE 1, TMS1; Flags: Precursor && PF00226:DnaJ domain	DnaJ
Solyc05g016060.2.ITAG2.4	1622.34	1719.16	2467.48	617.663	662.406	900.563	1936.33	726.878	1.41368	3.55e-10	1.32e-08	Solyc05g016060.2	SL2.50ch05	14383639	14385313	-	696	-	- && - && PF12734:Cysteine-rich TM module stress tolerance	-
Solyc03g007800.2.ITAG2.4	316.696	228.738	285.963	623.383	645.003	552.412	277.133	606.933	-1.12996	3.57e-10	1.33e-08	Solyc03g007800.2	SL2.50ch03	2347943	2362320	-	4134	-	- && - && PF04821:Timeless protein|PF05029:Timeless protein C terminal region	TIMELESS_C
Solyc02g094860.1.ITAG2.4	158.348	109.712	51.2312	611.944	430.727	445.754	106.43	496.142	-2.22219	3.78e-10	1.4e-08	Solyc02g094860.1	SL2.50ch02	48675694	48678745	+	1810	-	- && Q9ZW95.1 RecName: Full=Cytokinin hydroxylase; AltName: Full=Cytochrome P450 35A2 && PF00067:Cytochrome P450	p450
Solyc03g007170.2.ITAG2.4	1130.78	1077.45	1211.85	2422.04	3085.79	2040.61	1140.03	2516.15	-1.14188	3.86e-10	1.42e-08	Solyc03g007170.2	SL2.50ch03	1743953	1748364	-	1777	-	- && Q93ZG9.1 RecName: Full=Peptidyl-prolyl cis-trans isomerase FKBP53; Short=PPIase FKBP53; AltName: Full=FK506-binding protein 53; Short=AtFKBP53; AltName: Full=Immunophilin FKBP53; AltName: Full=Rotamase && PF00254:FKBP-type peptidyl-prolyl cis-trans isomerase	FKBP_C
Solyc01g102840.2.ITAG2.4	807.284	1178.88	1921.63	246.875	190.347	411.542	1302.6	282.921	2.20266	3.86e-10	1.42e-08	Solyc01g102840.2	SL2.50ch01	91531191	91536353	+	2438	-	- && Q40392.1 RecName: Full=TMV resistance protein N && PF00931:NB-ARC domain|PF01582:TIR domain	TIR
Solyc08g079080.2.ITAG2.4	984.09	1045.37	832.739	2129.41	1973.08	1668.31	954.065	1923.6	-1.01199	3.91e-10	1.44e-08	Solyc08g079080.2	SL2.50ch08	62722555	62726754	+	2147	-	- && P29001.1 RecName: Full=Acid beta-fructofuranosidase; AltName: Full=Acid invertase; Short=AI; AltName: Full=Acid sucrose hydrolase; AltName: Full=Vacuolar invertase; Contains: RecName: Full=Acid beta-fructofuranosidase 30 kDa subunit; Contains: RecName: Full=Acid beta-fructofuranosidase 38 kDa subunit; Flags: Precursor && PF00251:Glycosyl hydrolases family 32 N-terminal domain|PF11837:Domain …	-
Solyc02g079410.2.ITAG2.4	3231.08	3715.71	2768.35	1583.24	1375.93	1740.75	3238.38	1566.64	1.04732	3.99e-10	1.46e-08	Solyc02g079410.2	SL2.50ch02	43980185	43983126	+	1174	-	- && Q8VYN9.1 RecName: Full=Universal stress protein PHOS32; AltName: Full=Phosphorylated protein of 32 kDa; Short=AtPHOS32; Flags: Precursor && PF00582:Universal stress protein family	Usp
Solyc01g080480.2.ITAG2.4	80.6312	111.782	58.683	10.485	17.4031	12.0746	83.6986	13.3209	2.65759	4.01e-10	1.47e-08	Solyc01g080480.2	SL2.50ch01	79712302	79714399	+	1735	-	- && - && PF03372:Endonuclease/Exonuclease/phosphatase family	Exo_endo_phos
Solyc10g078220.1.ITAG2.4	124.347	80.7312	179.775	29.5487	20.6662	15.0932	128.284	21.7694	2.55675	4.06e-10	1.49e-08	Solyc10g078220.1	SL2.50ch10	60074003	60076372	-	1521	-	- && O22203.1 RecName: Full=Cytochrome P450 98A3; AltName: Full=Protein REDUCED EPIDERMAL FLUORESCENCE 8; AltName: Full=p-coumaroylshikimate/quinate 3'-hydrolxylase; Short=C3'H && PF00067:Cytochrome P450	p450
Solyc07g043420.2.ITAG2.4	8605.2	8147.64	8754.94	20331.4	21713.7	14188.6	8502.59	18744.6	-1.14048	4.07e-10	1.49e-08	Solyc07g043420.2	SL2.50ch07	57179845	57181570	+	1422	-	- && P24397.1 RecName: Full=Hyoscyamine 6-dioxygenase; AltName: Full=Hyoscyamine 6-beta-hydroxylase && PF14226:non-haem dioxygenase in morphine synthesis N-terminal|PF03171:2OG-Fe(II) oxygenase superfamily	2OG-FeII_Oxy
Solyc01g006170.2.ITAG2.4	610.077	515.438	646.444	1308.72	1635.89	1109.86	590.653	1351.49	-1.19355	4.5e-10	1.64e-08	Solyc01g006170.2	SL2.50ch01	809135	810275	-	1141	-	- && Q9LUJ5.1 RecName: Full=Probable rRNA-processing protein EBP2 homolog && PF05890:Eukaryotic rRNA processing protein EBP2	-
Solyc02g088940.2.ITAG2.4	119.49	119.027	154.625	41.9401	42.4201	39.2424	131.047	41.2009	1.67071	4.73e-10	1.72e-08	Solyc02g088940.2	SL2.50ch02	50859577	50862364	+	626	-	- && Q6GME1.1 RecName: Full=CTP synthase 2; AltName: Full=CTP synthetase 2; AltName: Full=UTP--ammonia ligase 2 && PF00117:Glutamine amidotransferase class-I	GATase
Solyc02g037500.1.ITAG2.4	108.804	143.867	190.952	20.9701	18.4908	43.2673	147.874	27.5761	2.42147	4.8e-10	1.75e-08	Solyc02g037500.1	SL2.50ch02	30965396	30965578	-	183	-	- && Q9FFE9.1 RecName: Full=Probable acyl-activating enzyme 6; AltName: Full=AMP-binding protein 6; Short=AtAMPBP6 && -	-
Solyc08g006740.2.ITAG2.4	1395.99	2351.56	1107.52	292.628	286.064	562.475	1618.36	380.389	2.08871	4.96e-10	1.8e-08	Solyc08g006740.2	SL2.50ch08	1295712	1298340	-	1695	-	- && P54772.1 RecName: Full=Histidine decarboxylase; Short=HDC; AltName: Full=TOM92 && PF00282:Pyridoxal-dependent decarboxylase conserved domain	-
Solyc01g007070.2.ITAG2.4	748.996	717.266	593.35	215.42	226.241	343.12	686.537	261.593	1.39177	5.63e-10	2.04e-08	Solyc01g007070.2	SL2.50ch01	1602912	1606381	-	2620	-	- && Q9SJ56.1 RecName: Full=BEL1-like homeodomain protein 1; Short=BEL1-like protein 1; AltName: Full=Protein EMBRYO SAC DEVELOPMENT ARREST 29 && PF05920:Homeobox KN domain|PF07526:Associated with HOX	POX
Solyc03g112230.2.ITAG2.4	3293.25	3689.83	3478.13	1576.57	1422.71	2041.61	3487.07	1680.29	1.05315	6.16e-10	2.22e-08	Solyc03g112230.2	SL2.50ch03	62694829	62699158	-	3028	-	- && Q9SB64.1 RecName: Full=Protein NBR1 homolog; Short=AtNBR1; AltName: Full=At4g24690 && PF16158:Ig-like domain from next to BRCA1 gene|PF00569:Zinc finger, ZZ type|PF00564:PB1 domain	ZZ
Solyc06g008890.2.ITAG2.4	612.02	755.561	501.134	233.53	214.276	290.796	622.905	246.201	1.33824	6.52e-10	2.35e-08	Solyc06g008890.2	SL2.50ch06	2833412	2835080	+	1475	-	- && Q94C25.1 RecName: Full=Probable receptor-like protein kinase At5g20050; Flags: Precursor && PF00069:Protein kinase domain	Pkinase
Solyc08g062330.2.ITAG2.4	656.707	943.934	888.628	294.534	222.978	378.337	829.756	298.616	1.47355	6.79e-10	2.44e-08	Solyc08g062330.2	SL2.50ch08	50907136	50909121	+	1677	-	- && - && PF13962:Domain of unknown function|PF12796:Ankyrin repeats (3 copies)|PF13857:Ankyrin repeats (many copies)	-
Solyc03g117280.2.ITAG2.4	2371.34	2613.41	2152.64	1000.84	773.351	1253.74	2379.13	1009.31	1.23669	6.91e-10	2.47e-08	Solyc03g117280.2	SL2.50ch03	66458894	66463341	+	2032	-	- && - && -	-
Solyc05g008440.1.ITAG2.4	1744.74	1539.07	2186.17	895.04	895.173	885.47	1823.33	891.894	1.03187	7.01e-10	2.5e-08	Solyc05g008440.1	SL2.50ch05	2797431	2798420	+	990	-	- && - && -	-
Solyc02g091540.2.ITAG2.4	109.775	129.377	67.0662	401.291	273.012	338.088	102.073	337.464	-1.72824	7.03e-10	2.5e-08	Solyc02g091540.2	SL2.50ch02	52803166	52804101	+	791	-	- && - && -	-
Solyc01g100900.2.ITAG2.4	6.80023	9.31514	3.7259	77.2079	46.7709	51.317	6.61376	58.4319	-3.15793	7.03e-10	2.5e-08	Solyc01g100900.2	SL2.50ch01	90793629	90796850	+	1389	-	- && Q8GXB4.1 RecName: Full=WAT1-related protein At1g09380 && PF00892:EamA-like transporter family	DUF6
Solyc06g074000.1.ITAG2.4	105.889	125.237	80.1069	314.551	304.555	239.479	103.744	286.195	-1.46633	7.2e-10	2.56e-08	Solyc06g074000.1	SL2.50ch06	45741796	45743181	-	1386	-	- && Q766C2.1 RecName: Full=Aspartic proteinase nepenthesin-2; AltName: Full=Nepenthesin-II; Flags: Precursor && PF14541:Xylanase inhibitor C-terminal|PF14543:Xylanase inhibitor N-terminal	-
Solyc10g052880.1.ITAG2.4	1866.18	2545.1	4993.64	882.649	667.845	824.091	3134.97	791.528	1.98566	7.36e-10	2.61e-08	Solyc10g052880.1	SL2.50ch10	54090763	54092199	+	1437	-	- && Q9M5J8.2 RecName: Full=Polygalacturonase inhibitor 2; AltName: Full=Polygalacturonase-inhibiting protein 2; Short=PGIP-2; Flags: Precursor && PF08263:Leucine rich repeat N-terminal domain|PF13855:Leucine rich repeat	LRRNT_2
Solyc04g056270.2.ITAG2.4	4482.32	3801.61	5232.1	2257.14	1989.39	2416.93	4505.34	2221.16	1.02031	7.78e-10	2.75e-08	Solyc04g056270.2	SL2.50ch04	53923428	53933858	-	3554	-	- && Q8GSA7.1 RecName: Full=Calmodulin-binding transcription activator 3; AltName: Full=Ethylene-induced calmodulin-binding protein 1; Short=EICBP1; AltName: Full=Ethylene-induced calmodulin-binding protein a; Short=EICBP.a; AltName: Full=Signal-responsive protein 1 && PF03859:CG-1 domain	CG-1
Solyc02g032100.2.ITAG2.4	130.176	174.918	105.257	378.414	362.203	332.051	136.783	357.556	-1.38879	7.84e-10	2.77e-08	Solyc02g032100.2	SL2.50ch02	27505845	27507762	+	1261	-	- && Q6L8G0.1 RecName: Full=Zinc transporter 5; AltName: Full=ZRT/IRT-like protein 5; Short=OsZIP5; Flags: Precursor && PF02535:ZIP Zinc transporter	-
Solyc06g030560.1.ITAG2.4	73.831	67.276	82.9013	19.0637	15.2277	15.0932	74.6695	16.4616	2.17875	8.36e-10	2.95e-08	Solyc06g030560.1	SL2.50ch06	19581981	19582349	+	369	-	- && - && -	-
Solyc01g098510.2.ITAG2.4	49.5445	32.0855	59.6144	0.953184	2.17539	2.01243	47.0815	1.71367	4.79992	8.87e-10	3.12e-08	Solyc01g098510.2	SL2.50ch01	89012925	89015465	-	536	-	- && - && -	-
Solyc07g063410.2.ITAG2.4	94.2317	138.692	135.995	17.1573	18.4908	38.2362	122.973	24.6281	2.31924	8.91e-10	3.14e-08	Solyc07g063410.2	SL2.50ch07	65883839	65885416	+	1406	-	- && Q93VY3.1 RecName: Full=NAC domain-containing protein 72; Short=ANAC072; AltName: Full=Protein RESPONSIVE TO DESICCATION 26 && PF02365:No apical meristem (NAM) protein	NAM
Solyc01g098750.2.ITAG2.4	590.648	516.473	722.825	281.189	231.679	289.79	609.982	267.553	1.1886	9.17e-10	3.22e-08	Solyc01g098750.2	SL2.50ch01	89182885	89189019	+	1341	-	- && Q8LA32.1 RecName: Full=Probable E3 ubiquitin-protein ligase LUL4; AltName: Full=Protein LOG2-LIKE UBIQUITIN LIGASE 4; AltName: Full=RING finger protein 208 && PF13920:Zinc finger, C3HC4 type (RING finger)	-
Solyc12g009560.1.ITAG2.4	6425.24	7568.03	3937.35	2466.84	1740.31	1962.12	5976.87	2056.42	1.53908	9.43e-10	3.3e-08	Solyc12g009560.1	SL2.50ch12	2815885	2818657	+	1914	-	- && Q708Y0.1 RecName: Full=EIN3-binding F-box protein 2 && -	-
Solyc05g007770.2.ITAG2.4	37.887	54.8558	163.008	4.76592	4.35078	6.03729	85.2503	5.05133	4.07664	9.66e-10	3.37e-08	Solyc05g007770.2	SL2.50ch05	2229720	2231644	+	1308	-	- && O49255.1 RecName: Full=NAC transcription factor 29; Short=AtNAC029; AltName: Full=Protein NAC-LIKE, ACTIVATED BY AP3/PI; Short=AtNAP && PF02365:No apical meristem (NAM) protein	NAM
Solyc03g096770.1.ITAG2.4	2.91438	3.10505	2.79443	38.1274	39.157	48.2984	2.93795	41.8609	-3.83482	9.75e-10	3.4e-08	Solyc03g096770.1	SL2.50ch03	59115462	59115809	-	348	-	- && - && -	-
Solyc07g054270.2.ITAG2.4	706.252	647.92	549.571	204.935	228.416	321.989	634.581	251.78	1.33362	9.78e-10	3.4e-08	Solyc07g054270.2	SL2.50ch07	62608885	62611270	-	1436	-	- && - && PF05623:Protein of unknown function (DUF789)	-
Solyc09g072810.2.ITAG2.4	295.324	347.765	544.913	142.978	104.419	121.752	396.001	123.05	1.68538	9.87e-10	3.43e-08	Solyc09g072810.2	SL2.50ch09	65509994	65514022	+	3925	-	- && Q8VZG8.3 RecName: Full=MDIS1-interacting receptor like kinase 2; Short=AtMIK2; AltName: Full=Probable LRR receptor-like serine/threonine-protein kinase At4g08850; Flags: Precursor && PF00069:Protein kinase domain|PF13855:Leucine rich repeat	Pkinase
Solyc08g068660.1.ITAG2.4	29.1438	80.7312	118.297	5.71911	3.26309	6.03729	76.0575	5.0065	3.91719	1.01e-09	3.52e-08	Solyc08g068660.1	SL2.50ch08	57784779	57785075	-	297	-	- && P54772.1 RecName: Full=Histidine decarboxylase; Short=HDC; AltName: Full=TOM92 && -	-
Solyc01g006090.2.ITAG2.4	189.435	194.583	222.623	440.371	615.636	420.598	202.213	492.202	-1.28207	1.02e-09	3.55e-08	Solyc01g006090.2	SL2.50ch01	754311	755769	+	1057	-	- && Q9LUJ5.1 RecName: Full=Probable rRNA-processing protein EBP2 homolog && PF05890:Eukaryotic rRNA processing protein EBP2	-
Solyc02g082170.1.ITAG2.4	56.3447	48.6457	60.5459	142.978	159.891	222.374	55.1788	175.081	-1.66401	1.05e-09	3.61e-08	Solyc02g082170.1	SL2.50ch02	45877961	45879196	-	1236	-	- && Q9SY29.1 RecName: Full=Probable purine permease 4; Short=AtPUP4 && PF16913:Purine nucleobase transmembrane transport	-
Solyc01g100030.2.ITAG2.4	631.449	516.473	682.772	1202.92	1474.91	1162.18	610.231	1280	-1.06794	1.06e-09	3.65e-08	Solyc01g100030.2	SL2.50ch01	90109000	90110385	+	1058	-	- && P32518.1 RecName: Full=Deoxyuridine 5'-triphosphate nucleotidohydrolase; Short=dUTPase; AltName: Full=P18; AltName: Full=dUTP pyrophosphatase && PF00692:dUTPase	-
Solyc06g067950.2.ITAG2.4	89.3744	117.992	74.518	229.717	258.871	255.579	93.9614	248.056	-1.40314	1.15e-09	3.94e-08	Solyc06g067950.2	SL2.50ch06	42119816	42122682	+	1127	-	- && - && PF02230:Phospholipase/Carboxylesterase	Abhydrolase_2
Solyc01g065980.2.ITAG2.4	668.365	1332.07	891.422	342.193	342.624	297.84	963.951	327.552	1.55698	1.17e-09	4e-08	Solyc01g065980.2	SL2.50ch01	72784546	72787001	-	1118	-	- && P42736.2 RecName: Full=Ethylene-responsive transcription factor RAP2-3; AltName: Full=Cadmium-induced protein AS30; AltName: Full=Ethylene response factor 72; Short=ERF72; AltName: Full=Ethylene-responsive element binding protein; Short=AtEBP; AltName: Full=Protein RELATED TO APETALA2 3; Short=Related to AP2 3 && PF00847:AP2 domain	AP2
Solyc05g050130.2.ITAG2.4	470.187	777.297	779.645	213.513	271.924	256.585	675.71	247.341	1.45055	1.21e-09	4.16e-08	Solyc05g050130.2	SL2.50ch05	60108919	60110761	-	1193	-	- && P29060.1 RecName: Full=Acidic endochitinase; Flags: Precursor && PF00704:Glycosyl hydrolases family 18	-
Solyc02g068680.1.ITAG2.4	102.003	465.757	643.65	9.53184	7.61387	19.1181	403.803	12.0879	5.06068	1.23e-09	4.22e-08	Solyc02g068680.1	SL2.50ch02	38624575	38625960	+	1386	-	- && - && -	-
Solyc04g048900.2.ITAG2.4	477.959	672.76	838.328	274.517	239.293	231.43	663.016	248.413	1.41608	1.28e-09	4.34e-08	Solyc04g048900.2	SL2.50ch04	38565211	38568669	+	1513	-	- && O04153.2 RecName: Full=Calreticulin-3; AltName: Full=Protein PRIORITY IN SWEET LIFE 1; Flags: Precursor && PF00262:Calreticulin family	-
Solyc02g084120.1.ITAG2.4	60.2306	94.1864	31.6702	4.76592	5.43848	4.02486	62.0291	4.74309	3.70975	1.28e-09	4.34e-08	Solyc02g084120.1	SL2.50ch02	47312360	47315010	-	468	-	- && Q9FK07.1 RecName: Full=CLP protease regulatory subunit CLPX1, mitochondrial; Flags: Precursor && -	-
Solyc09g011520.2.ITAG2.4	109.775	394.341	599.87	56.2379	30.4555	46.2859	367.995	44.3264	3.05137	1.28e-09	4.34e-08	Solyc09g011520.2	SL2.50ch09	4826832	4827949	-	1021	-	- && Q03662.1 RecName: Full=Probable glutathione S-transferase; AltName: Full=Auxin-induced protein PGNT1/PCNT110 && PF13417:Glutathione S-transferase, N-terminal domain|PF00043:Glutathione S-transferase, C-terminal domain	GST_C
Solyc05g012890.1.ITAG2.4	211.778	238.054	237.526	80.0675	70.7002	108.671	229.119	86.4797	1.40422	1.29e-09	4.39e-08	Solyc05g012890.1	SL2.50ch05	6033094	6036868	+	3591	-	- && Q6L3L0.1 RecName: Full=Putative late blight resistance protein homolog R1B-23 && PF12061:Protein of unknown function (DUF3542)|PF00931:NB-ARC domain	NB-ARC
Solyc04g071600.2.ITAG2.4	89.3744	222.528	380.042	20.0169	38.0693	32.1989	230.648	30.095	2.9419	1.32e-09	4.46e-08	Solyc04g071600.2	SL2.50ch04	58570436	58572050	+	610	-	- && P37220.2 RecName: Full=Abscisic stress-ripening protein 3 && PF02496:ABA/WDS induced protein	-
Solyc04g051360.2.ITAG2.4	41.7728	66.241	77.3125	8.57866	1.0877	1.00622	61.7754	3.55752	4.08066	1.34e-09	4.52e-08	Solyc04g051360.2	SL2.50ch04	50428809	50430249	+	1064	-	- && Q9FGF8.1 RecName: Full=Ethylene-responsive transcription factor ABR1; AltName: Full=Protein ABA REPRESSOR 1 && PF00847:AP2 domain	AP2
Solyc01g079550.2.ITAG2.4	605.22	771.087	611.979	344.1	300.204	329.033	662.762	324.445	1.02939	1.37e-09	4.63e-08	Solyc01g079550.2	SL2.50ch01	78617870	78618692	+	823	-	- && - && PF14009:Domain of unknown function (DUF4228)	-
Solyc12g062690.1.ITAG2.4	38.8584	46.5757	35.3961	140.118	146.839	105.653	40.2767	130.87	-1.70235	1.41e-09	4.75e-08	Solyc12g062690.1	SL2.50ch12	33930176	33930390	+	120	-	- && - && -	-
Solyc02g068660.1.ITAG2.4	291.438	332.24	351.166	116.288	69.6125	136.845	324.948	107.582	1.59207	1.42e-09	4.79e-08	Solyc02g068660.1	SL2.50ch02	38611673	38614191	-	2106	-	- && Q9S9M5.1 RecName: Full=Wall-associated receptor kinase-like 1; Flags: Precursor && PF00069:Protein kinase domain|PF13947:Wall-associated receptor kinase galacturonan-binding	Pkinase
Solyc09g011820.2.ITAG2.4	75.7739	90.0464	97.8049	214.466	286.064	206.274	87.8751	235.602	-1.42119	1.45e-09	4.85e-08	Solyc09g011820.2	SL2.50ch09	5092997	5097032	-	1808	-	- && - && -	-
Solyc02g071740.2.ITAG2.4	2100.3	2534.75	2671.47	1079.96	944.12	1354.37	2435.51	1126.15	1.11265	1.45e-09	4.85e-08	Solyc02g071740.2	SL2.50ch02	41108910	41115877	-	1964	-	- && O22558.2 RecName: Full=Serine/threonine-protein kinase STY8; AltName: Full=Serine/threonine/tyrosine-protein kinase 8 && PF12796:Ankyrin repeats (3 copies)|PF07714:Protein tyrosine kinase	Pkinase_Tyr
Solyc12g088670.1.ITAG2.4	18008	20295.6	13295.9	6791.44	4999.05	8139.28	17199.8	6643.25	1.37237	1.5e-09	5.03e-08	Solyc12g088670.1	SL2.50ch12	63949590	63953361	-	1401	-	- && P20721.1 RecName: Full=Low-temperature-induced cysteine proteinase; Flags: Precursor && PF00112:Papain family cysteine protease|PF08246:Cathepsin propeptide inhibitor domain (I29)|PF00396:Granulin	Peptidase_C1
Solyc01g109090.2.ITAG2.4	132.119	251.509	257.087	32.4083	35.8939	66.4102	213.572	44.9042	2.24961	1.52e-09	5.07e-08	Solyc01g109090.2	SL2.50ch01	96141644	96142108	+	465	-	- && - && -	-
Solyc00g217960.1.ITAG2.4	410.928	717.266	533.736	140.118	152.277	230.423	553.976	174.273	1.66816	1.56e-09	5.19e-08	Solyc00g217960.1	SL2.50ch00	19305694	19306137	+	444	-	- && Q9LUL6.1 RecName: Full=Putative RING-H2 finger protein ATL61; AltName: Full=RING-type E3 ubiquitin transferase ATL61 && PF13639:Ring finger domain	-
Solyc02g091740.2.ITAG2.4	324.468	246.334	349.303	109.616	137.05	123.765	306.702	123.477	1.31506	1.68e-09	5.57e-08	Solyc02g091740.2	SL2.50ch02	52977649	52979554	+	605	-	- && - && -	-
Solyc02g089650.2.ITAG2.4	62.1735	54.8558	40.0534	162.041	154.453	142.883	52.3609	153.126	-1.55049	1.69e-09	5.59e-08	Solyc02g089650.2	SL2.50ch02	51406602	51408450	+	1448	-	- && - && PF06880:Protein of unknown function (DUF1262)	-
Solyc08g007230.1.ITAG2.4	65.0879	119.027	286.894	11.4382	20.6662	18.1119	157.003	16.7388	3.23475	1.73e-09	5.71e-08	Solyc08g007230.1	SL2.50ch08	1811001	1811600	-	600	-	- && O80337.2 RecName: Full=Ethylene-responsive transcription factor 1A; Short=AtERF1A; AltName: Full=Ethylene-responsive element-binding factor 1A; Short=EREBP-1A && PF00847:AP2 domain	AP2
Solyc07g008930.1.ITAG2.4	808.255	957.389	1223.03	209.701	226.241	432.673	996.224	289.538	1.78273	1.77e-09	5.85e-08	Solyc07g008930.1	SL2.50ch07	3935838	3936437	-	600	-	- && - && PF14009:Domain of unknown function (DUF4228)	-
Solyc03g093060.1.ITAG2.4	757.739	484.387	539.324	1395.46	1323.73	1295	593.817	1338.06	-1.17186	1.8e-09	5.93e-08	Solyc03g093060.1	SL2.50ch03	54224072	54224401	+	330	-	- && P14009.1 RecName: Full=14 kDa proline-rich protein DC2.15; Flags: Precursor && PF14547:Hydrophobic seed protein	-
Solyc11g018560.1.ITAG2.4	345.84	353.975	381.905	741.577	828.824	616.81	360.573	729.07	-1.0152	1.81e-09	5.96e-08	Solyc11g018560.1	SL2.50ch11	8721428	8726834	+	759	-	- && B3CTF9.1 RecName: Full=50S ribosomal protein L25; AltName: Full=General stress protein CTC && PF14693:Ribosomal protein TL5, C-terminal domain|PF01386:Ribosomal L25p family	-
Solyc01g006660.1.ITAG2.4	807.284	517.508	478.778	1759.58	1462.95	1412.73	601.19	1545.09	-1.36188	1.92e-09	6.32e-08	Solyc01g006660.1	SL2.50ch01	1249071	1255565	-	2028	-	- && Q9LNU1.1 RecName: Full=CO(2)-response secreted protease; AltName: Full=Subtilisin-like serine protease; Short=AtSBT5.2; AltName: Full=Tripeptidyl-peptidase II; Flags: Precursor && PF05922:Peptidase inhibitor I9|PF02225:PA domain|PF00082:Subtilase family	Peptidase_S8
Solyc01g014840.2.ITAG2.4	771.34	899.429	1291.96	344.1	234.942	406.511	987.575	328.518	1.58737	1.94e-09	6.37e-08	Solyc01g014840.2	SL2.50ch01	15577916	15583605	-	4088	-	- && Q40392.1 RecName: Full=TMV resistance protein N && PF00931:NB-ARC domain|PF01582:TIR domain	TIR
Solyc09g009590.1.ITAG2.4	462.415	739.001	445.245	223.045	182.733	193.193	548.887	199.657	1.45764	2.04e-09	6.66e-08	Solyc09g009590.1	SL2.50ch09	3014324	3014779	+	456	-	- && Q9SJM6.1 RecName: Full=Zinc finger A20 and AN1 domain-containing stress-associated protein 4; Short=AtSAP4 && PF01754:A20-like zinc finger|PF01428:AN1-like Zinc finger	zf-A20
Solyc09g010850.2.ITAG2.4	1021.98	1207.86	1407.46	490.89	432.903	636.935	1212.43	520.242	1.22042	2.08e-09	6.79e-08	Solyc09g010850.2	SL2.50ch09	4169558	4172534	+	1504	-	- && P46573.2 RecName: Full=Protein kinase APK1B, chloroplastic; Flags: Precursor && PF07714:Protein tyrosine kinase	Pkinase_Tyr
Solyc08g005000.2.ITAG2.4	926.774	765.912	992.021	1934.01	2528.89	1666.29	894.902	2043.07	-1.1905	2.16e-09	7.05e-08	Solyc08g005000.2	SL2.50ch08	2178	5917	-	1650	-	- && Q9C7U5.2 RecName: Full=Glucan endo-1,3-beta-glucosidase 2; AltName: Full=(1->3)-beta-glucan endohydrolase 2; Short=(1->3)-beta-glucanase 2; AltName: Full=Beta-1,3-endoglucanase 2; Short=Beta-1,3-glucanase 2; Flags: Precursor && PF07983:X8 domain|PF00332:Glycosyl hydrolases family 17	Glyco_hydro_17
Solyc06g082010.2.ITAG2.4	600.363	1095.05	1072.13	277.377	196.873	355.194	922.513	276.481	1.73768	2.16e-09	7.05e-08	Solyc06g082010.2	SL2.50ch06	47961649	47964674	+	2371	-	- && Q9LUZ4.1 RecName: Full=Zinc finger CCCH domain-containing protein 66; Short=AtC3H66 && PF00642:Zinc finger C-x8-C-x5-C-x3-H type (and similar)|PF12796:Ankyrin repeats (3 copies)	zf-CCCH
Solyc07g008380.1.ITAG2.4	151.548	95.2214	76.381	338.38	382.869	295.827	107.717	339.026	-1.6542	2.17e-09	7.07e-08	Solyc07g008380.1	SL2.50ch07	3181743	3183080	-	1338	-	- && Q70PR7.2 RecName: Full=Vinorine synthase && PF02458:Transferase family	-
Solyc09g011580.2.ITAG2.4	2335.39	4212.51	3240.6	1262.02	1378.11	1324.18	3262.84	1321.44	1.304	2.19e-09	7.1e-08	Solyc09g011580.2	SL2.50ch09	4859444	4860733	+	915	-	- && P32111.1 RecName: Full=Probable glutathione S-transferase; AltName: Full=Pathogenesis-related protein 1 && PF00043:Glutathione S-transferase, C-terminal domain|PF13417:Glutathione S-transferase, N-terminal domain	GST_C
Solyc07g006680.1.ITAG2.4	51.4874	36.2255	16.7666	226.858	125.085	198.224	34.8265	183.389	-2.40016	2.36e-09	7.64e-08	Solyc07g006680.1	SL2.50ch07	1533666	1535024	+	1359	-	- && Q70PR7.2 RecName: Full=Vinorine synthase && PF02458:Transferase family	-
Solyc02g079240.1.ITAG2.4	92.2888	124.202	218.897	11.4382	13.0523	34.2113	145.129	19.5673	2.89095	2.38e-09	7.71e-08	Solyc02g079240.1	SL2.50ch02	43851273	43851512	-	240	-	- && - && -	-
Solyc03g117590.2.ITAG2.4	1722.4	2674.48	4699.29	417.495	654.793	923.706	3032.06	665.331	2.18834	2.41e-09	7.78e-08	Solyc03g117590.2	SL2.50ch03	66702243	66703491	-	805	-	- && Q9SAG8.1 RecName: Full=Chaperone protein dnaJ 8, chloroplastic; Short=AtDjC8; Short=AtJ8; Flags: Precursor && PF00226:DnaJ domain	DnaJ
Solyc07g053130.2.ITAG2.4	69.9452	104.537	43.7794	8.57866	10.877	10.0622	72.7537	9.83926	2.88759	2.46e-09	7.91e-08	Solyc07g053130.2	SL2.50ch07	61584258	61587453	-	2658	-	- && Q9ZR08.3 RecName: Full=G-type lectin S-receptor-like serine/threonine-protein kinase At4g03230; Flags: Precursor && PF01453:D-mannose binding lectin|PF00954:S-locus glycoprotein domain|PF07714:Protein tyrosine kinase|PF08276:PAN-like domain	Pkinase_Tyr
Solyc10g084790.1.ITAG2.4	211.778	239.089	164.871	489.937	585.18	420.598	205.246	498.572	-1.28123	2.49e-09	8e-08	Solyc10g084790.1	SL2.50ch10	64197222	64197702	+	246	-	- && O80932.1 RecName: Full=Expansin-A3; Short=AtEXPA3; AltName: Full=Alpha-expansin-3; Short=At-EXP3; Short=AtEx3; AltName: Full=Ath-ExpAlpha-1.9; Flags: Precursor && -	-
Solyc07g054830.2.ITAG2.4	852.943	810.417	1478.25	321.223	261.047	413.555	1047.2	331.942	1.6574	2.5e-09	8.03e-08	Solyc07g054830.2	SL2.50ch07	63000256	63010901	-	2169	-	- && Q9C5E5.1 RecName: Full=Diacylglycerol kinase 5; Short=AtDGK5; Short=DAG kinase 5; AltName: Full=Diglyceride kinase 5; Short=DGK 5 && PF00609:Diacylglycerol kinase accessory domain|PF00781:Diacylglycerol kinase catalytic domain	-
Solyc05g055970.2.ITAG2.4	659.622	902.534	616.637	291.674	305.642	352.176	726.264	316.497	1.19787	2.51e-09	8.06e-08	Solyc05g055970.2	SL2.50ch05	65380933	65383453	-	1010	-	- && - && PF13962:Domain of unknown function	-
Solyc01g099620.2.ITAG2.4	74.8025	108.677	82.9013	19.0637	20.6662	25.1554	88.7935	21.6284	2.0368	2.52e-09	8.07e-08	Solyc01g099620.2	SL2.50ch01	89802245	89806344	-	2846	-	- && Q948T9.1 RecName: Full=Respiratory burst oxidase homolog protein B; AltName: Full=NADPH oxidase RBOHB; AltName: Full=StRBOHB && PF08030:Ferric reductase NAD binding domain|PF01794:Ferric reductase like transmembrane component|PF08022:FAD-binding domain|PF08414:Respiratory burst NADPH oxidase	FAD_binding_8
Solyc11g005670.1.ITAG2.4	3177.65	4014.83	5659.65	1590.86	1814.28	1796.1	4284.04	1733.75	1.3052	2.54e-09	8.11e-08	Solyc11g005670.1	SL2.50ch11	496333	497937	+	1605	-	- && P0CG71.1 RecName: Full=Polyubiquitin-A; Contains: RecName: Full=Ubiquitin; Contains: RecName: Full=Ubiquitin-related; Flags: Precursor && PF00240:Ubiquitin family	ubiquitin
Solyc03g116530.2.ITAG2.4	554.704	719.336	444.314	1349.71	1199.73	1394.61	572.785	1314.68	-1.19947	2.54e-09	8.11e-08	Solyc03g116530.2	SL2.50ch03	65913029	65914334	-	905	-	- && - && PF12681:Glyoxalase-like domain	-
Solyc00g138060.2.ITAG2.4	50.516	52.7858	51.2312	231.624	169.68	124.771	51.511	175.358	-1.76854	2.72e-09	8.68e-08	Solyc00g138060.2	SL2.50ch00	17025800	17027795	+	1144	-	- && Q945B6.1 RecName: Full=Probable 2-oxoglutarate-dependent dioxygenase AOP1.2 && PF14226:non-haem dioxygenase in morphine synthesis N-terminal|PF03171:2OG-Fe(II) oxygenase superfamily	2OG-FeII_Oxy
Solyc05g052300.2.ITAG2.4	14.5719	27.9454	21.4239	149.65	66.3494	146.907	21.3138	120.969	-2.50952	2.77e-09	8.81e-08	Solyc05g052300.2	SL2.50ch05	62572297	62574448	-	1343	-	- && Q5XH90.1 RecName: Full=Sodium-coupled neutral amino acid transporter 2; AltName: Full=Amino acid transporter A2; AltName: Full=Solute carrier family 38 member 2; AltName: Full=System A amino acid transporter 2; AltName: Full=System A transporter 1; AltName: Full=System N amino acid transporter 2 && PF01490:Transmembrane amino acid transporter protein	Aa_trans
Solyc01g005420.2.ITAG2.4	166.12	269.104	433.136	61.0038	81.5772	54.3356	289.453	65.6389	2.14289	2.83e-09	8.97e-08	Solyc01g005420.2	SL2.50ch01	293530	294356	-	827	-	- && - && PF00168:C2 domain	C2
Solyc12g008760.1.ITAG2.4	880.143	926.339	1060.95	1954.98	2274.37	1622.02	955.811	1950.46	-1.02871	2.86e-09	9.07e-08	Solyc12g008760.1	SL2.50ch12	2116904	2120908	+	1191	-	- && Q9SU94.1 RecName: Full=Protein arginine N-methyltransferase 1.1; Short=AtPRMT11; AltName: Full=Arginine methyltransferase pam1; AltName: Full=Histone-arginine N-methyltransferase PRMT11 && PF06325:Ribosomal protein L11 methyltransferase (PrmA)	-
Solyc10g012170.2.ITAG2.4	456.587	602.379	533.736	261.172	220.802	269.666	530.9	250.547	1.08212	2.88e-09	9.12e-08	Solyc10g012170.2	SL2.50ch10	4518212	4524148	-	1611	-	- && Q8VZJ9.1 RecName: Full=Calmodulin-binding receptor-like cytoplasmic kinase 2 && PF07714:Protein tyrosine kinase	Pkinase_Tyr
Solyc01g067300.2.ITAG2.4	267.152	180.093	343.714	71.4888	90.2787	84.5221	263.653	82.0966	1.68574	3.06e-09	9.66e-08	Solyc01g067300.2	SL2.50ch01	75717699	75722118	-	902	-	- && A2PZE5.2 RecName: Full=CASP-like protein IN26; AltName: Full=CASP-like protein 1D1; Short=InCASPL1D1, partial [Ipomoea nil] && PF04535:Domain of unknown function (DUF588)	-
Solyc07g043250.1.ITAG2.4	114.632	219.423	247.773	26.6892	33.7186	57.3543	193.943	39.254	2.30539	3.08e-09	9.73e-08	Solyc07g043250.1	SL2.50ch07	56909878	56910360	-	483	-	- && Q9LIE6.1 RecName: Full=VQ motif-containing protein 22; Short=AtVQ22 && PF05678:VQ motif	-
Solyc02g079350.2.ITAG2.4	85.4885	217.353	112.709	23.8296	27.1924	27.1678	138.517	26.0633	2.40961	3.14e-09	9.88e-08	Solyc02g079350.2	SL2.50ch02	43943145	43945948	-	1765	-	- && Q9M0Y3.1 RecName: Full=Equilibrative nucleotide transporter 3; Short=AtENT3; AltName: Full=Nucleoside transporter ENT3; AltName: Full=Protein FLUOROURIDINE RESISTANT 1 && PF01733:Nucleoside transporter	-
Solyc10g076500.1.ITAG2.4	176.806	247.369	138.79	22.8764	32.6309	60.3729	187.655	38.6267	2.2806	3.2e-09	1e-07	Solyc10g076500.1	SL2.50ch10	59483475	59486003	-	2529	-	- && - && PF08263:Leucine rich repeat N-terminal domain|PF13855:Leucine rich repeat	LRRNT_2
Solyc07g043510.2.ITAG2.4	605.22	467.827	747.043	242.109	218.627	278.722	606.697	246.486	1.29959	3.24e-09	1.01e-07	Solyc07g043510.2	SL2.50ch07	57369982	57373762	+	796	-	- && - && PF02338:OTU-like cysteine protease	OTU
Solyc03g117960.2.ITAG2.4	48.573	61.0659	52.1626	153.463	147.927	132.82	53.9339	144.737	-1.42611	3.25e-09	1.02e-07	Solyc03g117960.2	SL2.50ch03	66933300	66943321	-	2381	-	- && - && PF06087:Tyrosyl-DNA phosphodiesterase|PF08797:HIRAN domain	Tyr-DNA_phospho
Solyc03g008010.2.ITAG2.4	3232.05	2329.82	2155.43	1245.81	1209.52	1172.24	2572.43	1209.19	1.08906	3.32e-09	1.04e-07	Solyc03g008010.2	SL2.50ch03	2471904	2478161	-	1028	-	- && - && PF05903:PPPDE putative peptidase domain	-
Solyc01g073770.2.ITAG2.4	397.327	455.407	537.461	147.744	177.294	229.417	463.399	184.818	1.32688	3.32e-09	1.04e-07	Solyc01g073770.2	SL2.50ch01	81149510	81150593	+	1084	-	- && - && -	-
Solyc04g082200.2.ITAG2.4	33937	51146.3	45755.9	15363.4	14216.2	22312.8	43613.1	17297.5	1.33419	3.36e-09	1.05e-07	Solyc04g082200.2	SL2.50ch04	65957495	65958867	-	1157	-	- && - && PF00257:Dehydrin	-
Solyc09g074050.2.ITAG2.4	1164.78	1431.43	850.437	2882.43	2366.83	3114.24	1148.88	2787.83	-1.27931	3.36e-09	1.05e-07	Solyc09g074050.2	SL2.50ch09	65748926	65755837	+	2081	-	- && - && -	-
Solyc10g050510.1.ITAG2.4	806.312	813.522	1277.98	386.993	423.114	367.269	965.94	392.458	1.29997	3.37e-09	1.05e-07	Solyc10g050510.1	SL2.50ch10	49916236	49916406	+	171	-	- && - && -	-
Solyc02g088220.2.ITAG2.4	599.391	572.364	814.11	244.968	211.013	322.995	661.955	259.659	1.34989	3.37e-09	1.05e-07	Solyc02g088220.2	SL2.50ch02	50377441	50381247	-	2592	-	- && Q6R8G7.2 RecName: Full=Phosphate transporter PHO1 homolog 3; AltName: Full=Protein PHO1 homolog 3; Short=AtPHO1;H3 && PF03124:EXS family|PF03105:SPX domain	SPX
Solyc01g009400.2.ITAG2.4	39.8299	90.0464	25.1498	271.658	233.855	275.703	51.6754	260.405	-2.33864	3.46e-09	1.07e-07	Solyc01g009400.2	SL2.50ch01	3606736	3609489	+	1031	-	- && Q9FMR0.1 RecName: Full=Peroxidase 60; Short=Atperox P60; AltName: Full=ATP14a; Flags: Precursor && PF00141:Peroxidase	-
Solyc04g074930.2.ITAG2.4	61.202	49.6808	46.5738	148.697	169.68	129.802	52.4855	149.393	-1.50846	3.5e-09	1.08e-07	Solyc04g074930.2	SL2.50ch04	60827050	60828752	+	1518	-	- && - && PF04577:Protein of unknown function (DUF563)	-
Solyc09g065850.2.ITAG2.4	189.435	322.925	300.867	47.6592	82.6648	92.5718	271.075	74.2986	1.86946	3.52e-09	1.09e-07	Solyc09g065850.2	SL2.50ch09	64115817	64117032	-	1029	-	- && O24542.1 RecName: Full=Auxin-induced protein 22D; AltName: Full=Indole-3-acetic acid-induced protein ARG13 && PF02309:AUX/IAA family	-
Solyc12g096150.1.ITAG2.4	2601.57	2218.04	2742.26	5295.89	6591.43	4366.98	2520.62	5418.1	-1.10386	3.55e-09	1.1e-07	Solyc12g096150.1	SL2.50ch12	65184544	65185746	+	621	-	- && P41127.1 RecName: Full=60S ribosomal protein L13-1; AltName: Full=Protein BBC1 homolog && PF01294:Ribosomal protein L13e	-
Solyc04g025210.2.ITAG2.4	326.411	274.279	340.92	146.79	145.751	153.951	313.87	148.831	1.07717	3.58e-09	1.1e-07	Solyc04g025210.2	SL2.50ch04	25272359	25273890	-	842	-	- && - && PF05003:Protein of unknown function (DUF668)	-
Solyc04g078340.2.ITAG2.4	146.691	133.517	146.242	47.6592	51.1217	60.3729	142.15	53.0513	1.42292	3.71e-09	1.14e-07	Solyc04g078340.2	SL2.50ch04	63103059	63105046	+	1929	-	- && Q6WNQ9.1 RecName: Full=Isoflavone 3'-hydroxylase; AltName: Full=Cytochrome P450 81E9, partial [Medicago truncatula] && PF00067:Cytochrome P450	p450
Solyc05g052660.1.ITAG2.4	96.1746	97.2915	108.983	13.3446	33.7186	22.1367	100.816	23.0666	2.13938	3.92e-09	1.2e-07	Solyc05g052660.1	SL2.50ch05	62875435	62875776	-	342	-	- && Q9FF86.1 RecName: Full=BAHD acyltransferase DCR; AltName: Full=Protein DEFECTIVE IN CUTICULAR RIDGES; AltName: Full=Protein PERMEABLE LEAVES 3 && PF02458:Transferase family	-
Solyc05g009010.1.ITAG2.4	39.8299	43.4707	68.9292	6.67229	5.43848	5.03108	50.7432	5.71395	3.14856	3.97e-09	1.21e-07	Solyc05g009010.1	SL2.50ch05	3184232	3185140	+	909	-	- && Q9C6K9.1 RecName: Full=LEAF RUST 10 DISEASE-RESISTANCE LOCUS RECEPTOR-LIKE PROTEIN KINASE-like 1.1; AltName: Full=Probable receptor-like serine/threonine-protein kinase LRK10L-1.1; Flags: Precursor && PF00069:Protein kinase domain	Pkinase
Solyc04g008230.2.ITAG2.4	114.632	143.867	115.503	282.143	252.345	296.834	124.668	277.107	-1.15455	4.07e-09	1.24e-07	Solyc04g008230.2	SL2.50ch04	1901661	1904764	-	1749	-	- && Q949Z1.1 RecName: Full=Polygalacturonase At1g48100; Short=PG; AltName: Full=Pectinase At1g48100; Flags: Precursor && PF00295:Glycosyl hydrolases family 28	-
Solyc12g057020.1.ITAG2.4	228.293	213.213	305.524	549.034	785.316	551.406	249.01	628.585	-1.33441	4.12e-09	1.25e-07	Solyc12g057020.1	SL2.50ch12	63099371	63100778	+	837	-	- && Q8L9J9.2 RecName: Full=Probable carbohydrate esterase At4g34215 && PF03629:Domain of unknown function (DUF303)	-
Solyc01g066940.2.ITAG2.4	636.307	706.916	1004.13	305.972	324.133	358.213	782.451	329.439	1.24844	4.14e-09	1.26e-07	Solyc01g066940.2	SL2.50ch01	75210356	75215737	+	1225	-	- && O23429.2 RecName: Full=Vesicle-associated membrane protein 724; Short=AtVAMP724; AltName: Full=SYBL1-like protein && PF13774:Regulated-SNARE-like domain|PF00957:Synaptobrevin	-
Solyc03g096760.1.ITAG2.4	10.6861	7.24511	0.931476	56.2379	54.3848	96.5967	6.28755	69.0731	-3.46851	4.14e-09	1.26e-07	Solyc03g096760.1	SL2.50ch03	59101941	59102279	-	339	-	- && Q9FIR9.1 RecName: Full=Protein RESPONSE TO LOW SULFUR 2; AltName: Full=Protein ENHANCED DE-ETIOLATION 6 && -	-
Solyc05g008390.2.ITAG2.4	140.862	153.182	139.721	54.3315	50.034	61.3792	144.588	55.2482	1.38621	4.25e-09	1.29e-07	Solyc05g008390.2	SL2.50ch05	2756559	2760072	-	1205	-	- && - && PF12906:RING-variant domain|PF12428:Protein of unknown function (DUF3675)	-
Solyc06g007440.2.ITAG2.4	1343.53	1765.74	2142.39	622.429	487.288	827.109	1750.55	645.609	1.43883	4.38e-09	1.33e-07	Solyc06g007440.2	SL2.50ch06	1453365	1455690	-	1813	-	- && O22932.1 RecName: Full=CBL-interacting serine/threonine-protein kinase 11; AltName: Full=SNF1-related kinase 3.22; AltName: Full=SOS2-like protein kinase PKS5; AltName: Full=SOS3-interacting protein 4 && PF00069:Protein kinase domain|PF03822:NAF domain	Pkinase
Solyc03g081320.2.ITAG2.4	623.678	510.263	706.058	309.785	240.381	288.784	613.333	279.65	1.1325	4.53e-09	1.37e-07	Solyc03g081320.2	SL2.50ch03	52192450	52196163	+	1909	-	- && - && PF01852:START domain	START
Solyc01g091700.2.ITAG2.4	772.311	811.452	1150.37	295.487	367.641	433.679	911.379	365.602	1.31841	4.56e-09	1.37e-07	Solyc01g091700.2	SL2.50ch01	85298270	85300242	+	1076	-	- && Q9LEX0.1 RecName: Full=F-box protein PP2-A13; AltName: Full=Protein PHLOEM PROTEIN 2-LIKE A13; Short=AtPP2-A13; AltName: Full=SKP1-interacting partner 9 && PF14299:Phloem protein 2	-
Solyc07g044980.2.ITAG2.4	2193.56	2785.23	2210.39	1207.68	927.804	1287.96	2396.39	1141.15	1.06995	4.65e-09	1.4e-07	Solyc07g044980.2	SL2.50ch07	58023185	58027908	-	2022	-	- && Q8L746.1 RecName: Full=Regulatory protein NPR3; AltName: Full=BTB/POZ domain-containing protein NPR3 && PF13637:Ankyrin repeats (many copies)|PF11900:Domain of unknown function (DUF3420)|PF12313:NPR1/NIM1 like defence protein C terminal|PF00651:BTB/POZ domain	BTB
Solyc06g053670.1.ITAG2.4	1408.62	1992.41	1628.22	719.654	628.688	893.52	1676.41	747.287	1.16527	4.69e-09	1.41e-07	Solyc06g053670.1	SL2.50ch06	36510255	36510974	-	720	-	- && O23299.1 RecName: Full=Enoyl-CoA delta isomerase 2, peroxisomal; AltName: Full=Delta(3),Delta(2)-enoyl CoA isomerase 2; Short=AtECI2; AltName: Full=Indole-3-butyric acid response 10 && PF00378:Enoyl-CoA hydratase/isomerase	ECH
Solyc07g048100.1.ITAG2.4	79.6598	41.4006	65.2033	194.45	230.591	171.057	62.0879	198.699	-1.67481	4.93e-09	1.47e-07	Solyc07g048100.1	SL2.50ch07	59284146	59295911	+	3018	-	- && - && -	-
Solyc09g009940.2.ITAG2.4	357.498	404.691	389.357	166.807	174.031	214.324	383.848	185.054	1.05248	5.06e-09	1.51e-07	Solyc09g009940.2	SL2.50ch09	3401811	3408955	-	2049	-	- && P37107.1 RecName: Full=Signal recognition particle 54 kDa protein, chloroplastic; Short=54 chloroplast protein; Short=54CP; Short=SRP54; Short=cpSRP54; AltName: Full=FFC; Flags: Precursor && PF02978:Signal peptide binding domain|PF00448:SRP54-type protein, GTPase domain|PF02881:SRP54-type protein, helical bundle domain	-
Solyc01g102680.2.ITAG2.4	1538.79	1838.19	1427.02	549.034	455.744	829.122	1601.33	611.3	1.38893	5.11e-09	1.52e-07	Solyc01g102680.2	SL2.50ch01	91415289	91424889	+	3123	-	- && Q9LT96.1 RecName: Full=Probable leucine-rich repeat receptor-like protein kinase At5g49770; Flags: Precursor && PF07714:Protein tyrosine kinase	Pkinase_Tyr
Solyc01g080410.2.ITAG2.4	41.7728	31.0505	30.7387	96.2716	144.663	115.715	34.5207	118.883	-1.78173	5.45e-09	1.62e-07	Solyc01g080410.2	SL2.50ch01	79654281	79655359	+	885	-	- && Q9ZS91.1 RecName: Full=Peptide methionine sulfoxide reductase B5; Short=AtMSRB5; AltName: Full=Peptide-methionine (R)-S-oxide reductase && PF01641:SelR domain	-
Solyc03g116270.2.ITAG2.4	121.433	128.342	114.571	360.304	361.115	230.423	121.449	317.281	-1.38579	5.53e-09	1.64e-07	Solyc03g116270.2	SL2.50ch03	65765649	65767053	+	1219	-	- && Q9ZSA7.1 RecName: Full=Protein DMR6-LIKE OXYGENASE 2; AltName: Full=2-oxoglutarate (2OG)-Fe(II) oxygenase-like protein DLO2; AltName: Full=Salicylate 3-hydroxylase DLO2; Short=S3H DLO2; Short=SA 3-hydroxylase DLO2; Short=Salicylic acid 3-hydroxylase DLO2 && PF03171:2OG-Fe(II) oxygenase superfamily|PF14226:non-haem dioxygenase in morphine synthesis N-terminal	2OG-FeII_Oxy
Solyc12g010670.1.ITAG2.4	105.889	105.572	92.2161	26.6892	32.6309	35.2176	101.226	31.5125	1.68536	5.58e-09	1.65e-07	Solyc12g010670.1	SL2.50ch12	3614742	3615416	+	675	-	- && Q6R567.1 RecName: Full=E3 ubiquitin-protein ligase RMA1H1; AltName: Full=Protein RING membrane-anchor 1 homolog 1 && PF00097:Zinc finger, C3HC4 type (RING finger)	zf-C3HC4
Solyc09g065770.1.ITAG2.4	321.553	728.651	587.761	97.2248	101.156	192.187	545.989	130.189	2.0679	5.62e-09	1.66e-07	Solyc09g065770.1	SL2.50ch09	64056743	64057795	+	1053	-	- && Q9FFY6.1 RecName: Full=Protein ELC-like; AltName: Full=ESCRT-I complex subunit VPS23 homolog 2; AltName: Full=Protein VACUOLAR PROTEIN SORTING 23B; AltName: Full=Vacuolar protein sorting-associated protein 23 homolog 2 && PF05743:UEV domain|PF09454:Vps23 core domain	-
Solyc10g011740.2.ITAG2.4	1228.9	1720.2	3188.44	386.04	547.111	654.04	2045.84	529.064	1.95147	5.63e-09	1.66e-07	Solyc10g011740.2	SL2.50ch10	3983198	3987001	-	976	-	- && Q94F47.1 RecName: Full=Ubiquitin-conjugating enzyme E2 28; AltName: Full=E2 ubiquitin-conjugating enzyme 28; AltName: Full=Ubiquitin carrier protein 28 && PF00179:Ubiquitin-conjugating enzyme	UQ_con
Solyc02g062890.1.ITAG2.4	411.899	858.028	694.881	90.5525	121.822	232.436	654.936	148.27	2.14319	5.9e-09	1.74e-07	Solyc02g062890.1	SL2.50ch02	34835321	34836745	-	1425	-	- && Q8GXR2.2 RecName: Full=Probable polyol transporter 6 && PF00083:Sugar (and other) transporter	Sugar_tr
Solyc04g074400.1.ITAG2.4	160.291	142.832	357.687	53.3783	39.157	46.2859	220.27	46.2738	2.25021	5.92e-09	1.74e-07	Solyc04g074400.1	SL2.50ch04	60406893	60407822	-	930	-	- && Q9ZPE7.1 RecName: Full=Protein EXORDIUM; Flags: Precursor && PF04674:Phosphate-induced protein 1 conserved region	-
Solyc12g056780.1.ITAG2.4	415.785	394.341	419.164	880.742	1076.82	702.339	409.763	886.633	-1.11303	6.3e-09	1.85e-07	Solyc12g056780.1	SL2.50ch12	62860563	62863258	-	543	-	- && P0C8Z0.2 RecName: Full=Uncharacterized protein OsI_027940 && PF04969:CS domain	-
Solyc03g094160.2.ITAG2.4	392.47	574.434	741.455	168.714	162.067	237.467	569.453	189.416	1.58794	6.44e-09	1.89e-07	Solyc03g094160.2	SL2.50ch03	56062329	56065607	+	1451	-	- && Q7XJE6.1 RecName: Full=Metacaspase-1; Short=AtMC1; AltName: Full=Metacaspase 1b; Short=AtMCP1b; AltName: Full=Protein LSD ONE LIKE 3 && PF00656:Caspase domain|PF06943:LSD1 zinc finger	Peptidase_C14
Solyc02g062700.2.ITAG2.4	764.54	686.215	877.45	1606.12	2082.94	1398.64	776.068	1695.9	-1.12728	6.52e-09	1.91e-07	Solyc02g062700.2	SL2.50ch02	34428918	34436392	+	2244	-	- && Q20748.2 RecName: Full=ATPase family AAA domain-containing protein 3 && PF00004:ATPase family associated with various cellular activities (AAA)|PF12037:Domain of unknown function (DUF3523)	AAA
Solyc02g090400.2.ITAG2.4	129.204	184.233	220.76	59.0974	57.6479	58.3605	178.066	58.3686	1.60933	6.68e-09	1.95e-07	Solyc02g090400.2	SL2.50ch02	51964681	51966977	+	1320	-	- && Q9ZQ85.2 RecName: Full=Myb family transcription factor EFM; AltName: Full=Protein EARLY FLOWERING MYB && PF00249:Myb-like DNA-binding domain	Myb_DNA-binding
Solyc06g071280.2.ITAG2.4	1310.5	2005.86	1533.21	538.549	484.024	801.954	1616.52	608.176	1.41002	6.68e-09	1.95e-07	Solyc06g071280.2	SL2.50ch06	43852757	43856103	-	2490	-	- && Q9SU72.1 RecName: Full=Protein EDS1; AltName: Full=Enhanced disease susceptibility 1 && PF01764:Lipase (class 3)	Lipase_3
Solyc10g008320.1.ITAG2.4	488.645	734.861	621.294	1353.52	1576.07	1182.3	614.933	1370.63	-1.1565	6.85e-09	2e-07	Solyc10g008320.1	SL2.50ch10	2464074	2464700	-	627	-	- && - && -	-
Solyc12g042890.1.ITAG2.4	62.1735	62.1009	65.2033	183.011	216.451	136.845	63.1592	178.769	-1.49972	7.34e-09	2.14e-07	Solyc12g042890.1	SL2.50ch12	39541825	39544102	+	774	-	- && - && PF02230:Phospholipase/Carboxylesterase	Abhydrolase_2
Solyc03g006030.2.ITAG2.4	88.4029	62.1009	85.6958	20.0169	18.4908	9.05594	78.7332	15.8545	2.31297	7.73e-09	2.25e-07	Solyc03g006030.2	SL2.50ch03	712130	717082	-	4082	-	- && Q1MX30.1 RecName: Full=Receptor kinase-like protein Xa21; Contains: RecName: Full=Receptor kinase-like protein Xa21, processed; Flags: Precursor && PF08263:Leucine rich repeat N-terminal domain|PF13855:Leucine rich repeat|PF00069:Protein kinase domain	Pkinase
Solyc08g078340.2.ITAG2.4	1143.41	1339.31	1134.54	571.911	518.831	714.413	1205.75	601.718	1.00229	8.02e-09	2.33e-07	Solyc08g078340.2	SL2.50ch08	62156077	62159106	+	1526	-	- && Q2V9B0.1 RecName: Full=Transcription factor MYB1R1; AltName: Full=Myb-related protein R1; Short=StMYB1R-1 && PF00249:Myb-like DNA-binding domain	Myb_DNA-binding
Solyc04g054340.1.ITAG2.4	1307.59	2007.93	1748.38	434.652	538.409	813.022	1687.97	595.361	1.50349	8.17e-09	2.37e-07	Solyc04g054340.1	SL2.50ch04	52342847	52343098	+	252	-	- && - && -	-
Solyc10g081620.1.ITAG2.4	738.31	795.927	967.803	466.107	355.676	369.281	834.013	397.022	1.07024	8.37e-09	2.42e-07	Solyc10g081620.1	SL2.50ch10	62668240	62671478	+	1551	-	- && Q9FG14.1 RecName: Full=Myosin-binding protein 7 && PF04576:Zein-binding	-
Solyc06g006000.2.ITAG2.4	235.093	215.283	109.914	38.1274	58.7356	35.2176	186.764	44.0268	2.08757	8.53e-09	2.47e-07	Solyc06g006000.2	SL2.50ch06	1007187	1010255	-	825	-	- && - && -	-
Solyc01g107090.2.ITAG2.4	256.466	564.084	816.904	108.663	104.419	152.945	545.818	122.009	2.16137	8.68e-09	2.51e-07	Solyc01g107090.2	SL2.50ch01	94729625	94730330	-	706	-	- && - && -	-
Solyc10g008350.2.ITAG2.4	242.865	362.255	465.738	67.6761	80.4895	136.845	356.953	95.0036	1.91006	8.72e-09	2.52e-07	Solyc10g008350.2	SL2.50ch10	2483667	2484470	+	524	-	- && - && -	-
Solyc10g006720.2.ITAG2.4	60.2306	80.7312	33.5331	4.76592	4.35078	9.05594	58.165	6.05755	3.25846	9.3e-09	2.68e-07	Solyc10g006720.2	SL2.50ch10	1184213	1188819	+	2634	-	- && O81832.4 RecName: Full=G-type lectin S-receptor-like serine/threonine-protein kinase At4g27290; Flags: Precursor && PF01453:D-mannose binding lectin|PF11883:Domain of unknown function (DUF3403)|PF00954:S-locus glycoprotein domain|PF07714:Protein tyrosine kinase|PF08276:PAN-like domain	Pkinase_Tyr
Solyc02g086980.2.ITAG2.4	74.8025	50.7158	79.1754	183.965	187.084	171.057	68.2312	180.702	-1.40163	9.67e-09	2.78e-07	Solyc02g086980.2	SL2.50ch02	49545154	49546703	+	688	-	- && Q9SU64.1 RecName: Full=Probable cyclic nucleotide-gated ion channel 16; AltName: Full=Cyclic nucleotide- and calmodulin-regulated ion channel 16 && PF00027:Cyclic nucleotide-binding domain	cNMP_binding
Solyc08g078060.2.ITAG2.4	1254.16	1347.59	1368.34	583.349	584.092	808.997	1323.36	658.813	1.00617	9.81e-09	2.82e-07	Solyc08g078060.2	SL2.50ch08	61912277	61914286	-	846	-	- && - && -	-
Solyc04g077850.2.ITAG2.4	846.142	1242.02	1046.05	392.712	335.01	535.307	1044.74	421.01	1.31068	9.97e-09	2.86e-07	Solyc04g077850.2	SL2.50ch04	62728726	62731135	+	1546	-	- && O22193.3 RecName: Full=U-box domain-containing protein 4; AltName: Full=Plant U-box protein 4 && PF00514:Armadillo/beta-catenin-like repeat	Arm
Solyc01g094720.2.ITAG2.4	120.461	93.1514	102.462	229.717	293.678	228.411	105.358	250.602	-1.24822	1.03e-08	2.95e-07	Solyc01g094720.2	SL2.50ch01	86152532	86158757	+	2341	-	- && Q8GX78.1 RecName: Full=Ascorbate transporter, chloroplastic; AltName: Full=Phosphate transporter PHT4;4; Short=AtPHT4;4; AltName: Full=Probable anion transporter 2; Flags: Precursor && PF07690:Major Facilitator Superfamily	MFS_1
Solyc12g009930.1.ITAG2.4	1293.99	1050.54	1064.68	2597.43	2416.86	1873.57	1136.4	2295.95	-1.0146	1.06e-08	3.02e-07	Solyc12g009930.1	SL2.50ch12	3095649	3097004	+	1239	-	- && P56725.1 RecName: Full=Zeatin O-xylosyltransferase; AltName: Full=Zeatin O-beta-D-xylosyltransferase && PF00201:UDP-glucoronosyl and UDP-glucosyl transferase	UDPGT
Solyc10g081650.1.ITAG2.4	808.255	830.083	876.519	392.712	346.975	501.095	838.285	413.594	1.01878	1.06e-08	3.03e-07	Solyc10g081650.1	SL2.50ch10	62682440	62686988	-	1848	-	- && Q8S4R4.1 RecName: Full=Prolycopene isomerase, chloroplastic; Short=CrtISO; AltName: Full=Carotenoid isomerase; AltName: Full=Protein tangerine; Flags: Precursor && PF01593:Flavin containing amine oxidoreductase	Amino_oxidase
Solyc06g069230.2.ITAG2.4	197.207	202.863	228.212	427.027	529.708	384.374	209.427	447.036	-1.09273	1.09e-08	3.09e-07	Solyc06g069230.2	SL2.50ch06	42988321	42995483	-	2962	-	- && O24617.1 RecName: Full=DNA mismatch repair protein MSH2; Short=AtMSH2; AltName: Full=MutS protein homolog 2 && PF05188:MutS domain II|PF00488:MutS domain V|PF05190:MutS family domain IV|PF05192:MutS domain III|PF01624:MutS domain I	-
Solyc02g091630.1.ITAG2.4	68.0023	36.2255	47.5053	4.76592	5.43848	8.04973	50.5777	6.08471	3.05737	1.15e-08	3.25e-07	Solyc02g091630.1	SL2.50ch02	52881668	52884521	+	696	-	- && - && -	-
Solyc09g014900.2.ITAG2.4	209.836	248.404	259.882	55.2847	46.7709	104.646	239.374	68.9007	1.79532	1.19e-08	3.36e-07	Solyc09g014900.2	SL2.50ch09	7154809	7157411	-	1894	-	- && O81970.1 RecName: Full=Cytochrome P450 71A9; AltName: Full=Cytochrome P450 CP1 && PF00067:Cytochrome P450	p450
Solyc01g073840.1.ITAG2.4	126.29	95.2214	185.364	18.1105	34.8063	37.23	135.625	30.0489	2.18015	1.2e-08	3.38e-07	Solyc01g073840.1	SL2.50ch01	81182313	81183692	-	1380	-	- && - && PF07649:C1-like domain|PF03107:C1 domain	C1_3
Solyc01g067020.2.ITAG2.4	42.7443	66.241	82.9013	6.67229	13.0523	3.01865	63.9622	7.58109	3.09226	1.21e-08	3.4e-07	Solyc01g067020.2	SL2.50ch01	75351842	75356292	-	2051	-	- && Q9LP77.1 RecName: Full=Probable inactive receptor kinase At1g48480; Flags: Precursor && PF13855:Leucine rich repeat|PF08263:Leucine rich repeat N-terminal domain|PF00069:Protein kinase domain	Pkinase
Solyc01g109800.2.ITAG2.4	366.241	335.345	324.154	152.509	160.979	191.181	341.913	168.223	1.02338	1.23e-08	3.45e-07	Solyc01g109800.2	SL2.50ch01	96662690	96663884	+	1195	-	- && - && -	-
Solyc11g005240.1.ITAG2.4	59.2591	33.1205	17.698	0	0	0	36.6925	0	7.61912	1.24e-08	3.48e-07	Solyc11g005240.1	SL2.50ch11	197404	200197	-	1299	-	- && Q8GWZ6.2 RecName: Full=Protein SENSITIVITY TO RED LIGHT REDUCED 1 && PF13456:Reverse transcriptase-like|PF07985:SRR1	SRR1
Solyc02g089510.2.ITAG2.4	178.749	244.264	125.749	48.6124	15.2277	42.2611	182.921	35.3671	2.3634	1.28e-08	3.58e-07	Solyc02g089510.2	SL2.50ch02	51311139	51315443	+	206	-	- && - && -	-
Solyc05g015330.1.ITAG2.4	77.7169	62.1009	75.4495	165.854	212.101	167.032	71.7558	181.662	-1.33714	1.29e-08	3.6e-07	Solyc05g015330.1	SL2.50ch05	10362181	10362615	-	435	-	- && A6BLW4.1 RecName: Full=Nuclear transcription factor Y subunit C-2; Short=OsNF-YC2; AltName: Full=Transcriptional activator HAP5C; Short=OsHAP5C && PF00808:Histone-like transcription factor (CBF/NF-Y) and archaeal histone	-
Solyc04g078450.2.ITAG2.4	23.3151	44.5057	79.1754	0.953184	1.0877	3.01865	48.9987	1.68651	4.86072	1.32e-08	3.67e-07	Solyc04g078450.2	SL2.50ch04	63184297	63184807	+	423	-	- && - && -	-
Solyc09g005570.2.ITAG2.4	30.1153	80.7312	94.079	0.953184	3.26309	9.05594	68.3085	4.42407	3.95407	1.35e-08	3.77e-07	Solyc09g005570.2	SL2.50ch09	399157	400731	+	1259	-	- && - && PF14383:DUF761-associated sequence motif	-
Solyc02g079870.2.ITAG2.4	185.549	238.054	147.173	433.699	415.5	472.921	190.259	440.707	-1.21383	1.37e-08	3.8e-07	Solyc02g079870.2	SL2.50ch02	44274921	44275748	+	594	-	- && - && -	-
Solyc04g040130.1.ITAG2.4	165.148	115.922	207.719	50.5188	52.2094	30.1865	162.93	44.3049	1.88077	1.38e-08	3.84e-07	Solyc04g040130.1	SL2.50ch04	12032700	12033827	+	1128	-	- && Q8GZC3.1 RecName: Full=Delta(12)-fatty-acid desaturase FAD2 && PF11960:Domain of unknown function (DUF3474)|PF00487:Fatty acid desaturase	-
Solyc10g047540.1.ITAG2.4	46.6301	48.6457	40.9849	131.539	156.628	108.671	45.4203	132.28	-1.54248	1.43e-08	3.97e-07	Solyc10g047540.1	SL2.50ch10	41080912	41083482	+	2571	-	- && - && -	-
Solyc08g079840.1.ITAG2.4	53.4303	75.5561	33.5331	7.62547	6.52617	5.03108	54.1732	6.39424	3.07784	1.47e-08	4.07e-07	Solyc08g079840.1	SL2.50ch08	63283457	63285700	-	2244	-	- && O65351.1 RecName: Full=Subtilisin-like protease SBT1.7; AltName: Full=Cucumisin-like serine protease; AltName: Full=Subtilase subfamily 1 member 7; Short=AtSBT1.7; AltName: Full=Subtilisin-like serine protease 1; Short=At-SLP1; Flags: Precursor && PF05922:Peptidase inhibitor I9|PF02225:PA domain|PF00082:Subtilase family	Peptidase_S8
Solyc01g098100.2.ITAG2.4	508.074	538.208	599.87	1136.2	1429.23	939.805	548.717	1168.41	-1.08995	1.52e-08	4.18e-07	Solyc01g098100.2	SL2.50ch01	88701644	88702433	+	790	-	- && A4QND5.1 RecName: Full=60S ribosome subunit biogenesis protein NIP7 homolog && PF03657:Uncharacterised protein family (UPF0113)	-
Solyc11g071990.1.ITAG2.4	907.344	1116.78	1248.18	430.839	342.624	573.543	1090.77	449.002	1.28011	1.52e-08	4.19e-07	Solyc11g071990.1	SL2.50ch11	55291627	55294045	+	1110	-	- && Q54NS8.1 RecName: Full=Apoptosis-inducing factor homolog B && PF07992:Pyridine nucleotide-disulphide oxidoreductase	Pyr_redox_2
Solyc12g010420.1.ITAG2.4	483.787	546.488	637.129	35.2678	89.191	178.1	555.802	100.853	2.46322	1.55e-08	4.26e-07	Solyc12g010420.1	SL2.50ch12	3460518	3460688	-	171	-	- && - && -	-
Solyc08g081030.1.ITAG2.4	603.277	736.931	516.969	233.53	216.451	322.995	619.059	257.659	1.2638	1.58e-08	4.35e-07	Solyc08g081030.1	SL2.50ch08	64159427	64160569	-	1143	-	- && - && PF13419:Haloacid dehalogenase-like hydrolase	-
Solyc03g097180.2.ITAG2.4	782.997	917.024	1283.57	451.809	429.64	432.673	994.532	438.041	1.1831	1.59e-08	4.37e-07	Solyc03g097180.2	SL2.50ch03	59497348	59504484	-	1464	-	- && - && PF08378:Nuclease-related domain	-
Solyc12g044610.1.ITAG2.4	321.553	334.31	268.265	101.991	119.646	157.976	308.043	126.538	1.28367	1.63e-08	4.46e-07	Solyc12g044610.1	SL2.50ch12	38223437	38230947	+	1128	-	- && Q2V9B0.1 RecName: Full=Transcription factor MYB1R1; AltName: Full=Myb-related protein R1; Short=StMYB1R-1 && PF00249:Myb-like DNA-binding domain	Myb_DNA-binding
Solyc07g049180.2.ITAG2.4	2120.7	2204.58	1756.76	739.671	564.514	1072.63	2027.35	792.27	1.35518	1.64e-08	4.49e-07	Solyc07g049180.2	SL2.50ch07	59437488	59447380	-	2362	-	- && Q6UD73.1 RecName: Full=LysM domain receptor-like kinase 3; Short=LysM-containing receptor-like kinase 3; Short=MtLYK3; AltName: Full=LysM receptor kinase K1B; AltName: Full=Protein HAIR CURLING; Flags: Precursor && PF07714:Protein tyrosine kinase	Pkinase_Tyr
Solyc06g063190.2.ITAG2.4	231.208	376.746	473.19	121.054	119.646	122.758	360.381	121.153	1.57287	1.64e-08	4.49e-07	Solyc06g063190.2	SL2.50ch06	39912489	39916079	+	3152	-	- && Q9C5V5.2 RecName: Full=Glutamate receptor 2.8; AltName: Full=Ligand-gated ion channel 2.8; Flags: Precursor && PF01094:Receptor family ligand binding region|PF00497:Bacterial extracellular solute-binding proteins, family 3|PF00060:Ligand-gated ion channel	ANF_receptor
Solyc06g068930.1.ITAG2.4	709.166	791.787	581.241	382.227	318.695	318.97	694.065	339.964	1.02856	1.68e-08	4.59e-07	Solyc06g068930.1	SL2.50ch06	42758485	42759639	+	741	-	- && Q9LVI4.1 RecName: Full=Protein TIFY 6B; AltName: Full=Jasmonate ZIM domain-containing protein 3; AltName: Full=Protein JASMONATE INSENSITIVE 3 && PF06200:tify domain|PF09425:Divergent CCT motif	Zim
Solyc02g072150.2.ITAG2.4	2349.96	3324.47	4136.68	1096.16	968.049	1566.68	3270.37	1210.3	1.43403	1.72e-08	4.7e-07	Solyc02g072150.2	SL2.50ch02	41431871	41435950	-	3019	-	- && Q9LMI0.1 RecName: Full=Probable alpha,alpha-trehalose-phosphate synthase [UDP-forming] 7; AltName: Full=Trehalose-6-phosphate synthase 7; Short=AtTPS7 && PF02358:Trehalose-phosphatase|PF00982:Glycosyltransferase family 20	-
Solyc07g055810.2.ITAG2.4	661.565	595.134	951.037	311.691	244.731	338.088	735.912	298.17	1.30312	1.85e-08	5.03e-07	Solyc07g055810.2	SL2.50ch07	63735427	63745288	+	3163	-	- && C0LGE0.1 RecName: Full=Probable LRR receptor-like serine/threonine-protein kinase At1g07650; Flags: Precursor && PF00069:Protein kinase domain|PF11721:Di-glucose binding within endoplasmic reticulum|PF13855:Leucine rich repeat	Pkinase
Solyc07g008250.2.ITAG2.4	6772.05	9686.71	4254.98	2455.4	1621.75	2516.55	6904.58	2197.9	1.65128	1.87e-08	5.07e-07	Solyc07g008250.2	SL2.50ch07	2976382	2979543	-	2535	-	- && Q708Y0.1 RecName: Full=EIN3-binding F-box protein 2 && -	-
Solyc01g010310.2.ITAG2.4	786.883	705.881	787.097	1690	1805.57	1211.48	759.954	1569.02	-1.04563	1.91e-08	5.17e-07	Solyc01g010310.2	SL2.50ch01	5134694	5138389	-	803	-	- && Q9SD84.1 RecName: Full=PLASMODESMATA CALLOSE-BINDING PROTEIN 2; Short=AtPDCB2; AltName: Full=Glucan endo-1,3-beta-glucosidase-like protein 3; Flags: Precursor && PF07983:X8 domain	-
Solyc02g077290.1.ITAG2.4	97.1461	107.642	140.653	28.5955	28.2801	43.2673	115.147	33.381	1.7865	1.97e-08	5.34e-07	Solyc02g077290.1	SL2.50ch02	42273040	42276977	+	2778	-	- && Q9C5V5.2 RecName: Full=Glutamate receptor 2.8; AltName: Full=Ligand-gated ion channel 2.8; Flags: Precursor && PF01094:Receptor family ligand binding region|PF00060:Ligand-gated ion channel|PF00497:Bacterial extracellular solute-binding proteins, family 3	ANF_receptor
Solyc09g074270.2.ITAG2.4	3279.65	4261.16	2922.97	1742.42	1504.28	1869.55	3487.93	1705.42	1.032	1.99e-08	5.39e-07	Solyc09g074270.2	SL2.50ch09	66057802	66059629	-	1576	-	- && Q9LYC1.1 RecName: Full=Gibberellin receptor GID1B; AltName: Full=AtCXE14; AltName: Full=Carboxylesterase 14; AltName: Full=GID1-like protein 2; AltName: Full=Protein GA INSENSITIVE DWARF 1B; Short=AtGID1B && PF07859:alpha/beta hydrolase fold	Abhydrolase_3
Solyc05g013650.2.ITAG2.4	213.721	181.128	121.092	513.766	399.184	416.573	171.98	443.175	-1.36703	2.1e-08	5.65e-07	Solyc05g013650.2	SL2.50ch05	6953265	6955654	-	1284	-	- && - && PF05212:Protein of unknown function (DUF707)	-
Solyc04g064880.2.ITAG2.4	809.227	1343.45	1373	370.789	418.763	548.388	1175.22	445.98	1.39796	2.15e-08	5.78e-07	Solyc04g064880.2	SL2.50ch04	56039889	56041984	+	1003	-	- && P16273.2 RecName: Full=Pathogen-related protein && -	-
Solyc08g077780.2.ITAG2.4	4084.99	7442.8	3331.89	1672.84	1247.59	1836.34	4953.23	1585.59	1.64318	2.26e-08	6.06e-07	Solyc08g077780.2	SL2.50ch08	61690672	61696420	+	1505	-	- && A2ZAB5.2 RecName: Full=Serine/threonine-protein kinase SAPK3; AltName: Full=Osmotic stress/abscisic acid-activated protein kinase 3; AltName: Full=Protein kinase REK >P0C5D6.1 RecName: Full=Serine/threonine-protein kinase SAPK3; AltName: Full=Osmotic stress/abscisic acid-activated protein kinase 3; AltName: Full=Protein kinase REK && PF00069:Protein kinase domain	Pkinase
Solyc04g082420.2.ITAG2.4	1657.31	1478	1412.12	631.008	402.447	776.799	1515.81	603.418	1.32828	2.34e-08	6.24e-07	Solyc04g082420.2	SL2.50ch04	66081265	66084327	-	1701	-	- && Q8LEV3.1 RecName: Full=BTB/POZ domain-containing protein At2g30600 && PF00651:BTB/POZ domain|PF12248:Farnesoic acid 0-methyl transferase	BTB
Solyc11g006000.1.ITAG2.4	2580.2	2434.36	2858.7	1395.46	996.329	1476.12	2624.42	1289.3	1.02512	2.34e-08	6.25e-07	Solyc11g006000.1	SL2.50ch11	809687	815717	+	1845	-	- && Q9CAD5.1 RecName: Full=Mitogen-activated protein kinase kinase kinase YODA; AltName: Full=YODA MAPKK kinase && PF00069:Protein kinase domain	Pkinase
Solyc12g010430.1.ITAG2.4	727.624	996.72	728.414	229.717	291.502	412.548	817.586	311.256	1.39332	2.35e-08	6.27e-07	Solyc12g010430.1	SL2.50ch12	3464007	3464420	-	414	-	- && - && -	-
Solyc09g005080.1.ITAG2.4	1046.26	1163.36	1339.46	351.725	302.379	610.773	1183.03	421.626	1.48819	2.44e-08	6.48e-07	Solyc09g005080.1	SL2.50ch09	48645	52064	-	3420	-	- && Q9C9H7.2 RecName: Full=Receptor-like protein 12; Short=AtRLP12; Flags: Precursor && PF08263:Leucine rich repeat N-terminal domain|PF13855:Leucine rich repeat	LRRNT_2
Solyc07g048070.2.ITAG2.4	151.548	457.477	633.403	72.442	77.2264	88.547	414.143	79.4051	2.38307	2.44e-08	6.48e-07	Solyc07g048070.2	SL2.50ch07	59252667	59254949	+	1508	-	- && Q9FKH6.1 RecName: Full=Cytochrome b561 and DOMON domain-containing protein At5g35735; AltName: Full=Protein b561A.tha16; Flags: Precursor && PF04526:Protein of unknown function (DUF568)|PF03188:Eukaryotic cytochrome b561	Cytochrom_B561
Solyc01g067510.2.ITAG2.4	272.009	275.314	213.308	564.285	448.13	554.425	253.544	522.28	-1.04404	2.53e-08	6.7e-07	Solyc01g067510.2	SL2.50ch01	76239691	76242373	+	1972	-	- && Q9LX29.1 RecName: Full=Serine/threonine-protein kinase-like protein ACR4; AltName: Full=Protein CRINKLY 4; Short=AtCR4; Flags: Precursor && PF07714:Protein tyrosine kinase	Pkinase_Tyr
Solyc10g084780.1.ITAG2.4	303.096	252.544	177.912	593.834	709.177	518.201	244.517	607.071	-1.31225	2.58e-08	6.8e-07	Solyc10g084780.1	SL2.50ch10	64195904	64197124	-	372	-	- && Q9LZ99.1 RecName: Full=Expansin-A9; Short=AtEXPA9; AltName: Full=Alpha-expansin-9; Short=At-EXP9; Short=AtEx9; AltName: Full=Ath-ExpAlpha-1.10; Flags: Precursor && PF01357:Pollen allergen	-
Solyc03g111140.2.ITAG2.4	170.006	119.027	406.123	33.3615	21.7539	53.3294	231.719	36.1483	2.67911	2.58e-08	6.8e-07	Solyc03g111140.2	SL2.50ch03	61799560	61802073	-	1978	-	- && P08216.2 RecName: Full=Malate synthase, glyoxysomal && PF01274:Malate synthase	-
Solyc02g077230.2.ITAG2.4	331.268	305.33	412.644	172.526	101.156	128.796	349.747	134.159	1.38017	2.59e-08	6.83e-07	Solyc02g077230.2	SL2.50ch02	42226085	42227465	+	457	-	- && - && -	-
Solyc03g078770.2.ITAG2.4	68.0023	48.6457	27.0128	279.283	171.856	155.963	47.8869	202.367	-2.08183	2.62e-08	6.87e-07	Solyc03g078770.2	SL2.50ch03	51451020	51452708	+	1585	-	- && U3U992.1 RecName: Full=7-deoxyloganetic acid glucosyltransferase; AltName: Full=UDP-glucose glucosyltransferase 8; Short=CrUGT8; AltName: Full=UDP-glycosyltransferase 709C2 && PF00201:UDP-glucoronosyl and UDP-glucosyl transferase	UDPGT
Solyc08g077990.2.ITAG2.4	287.552	252.544	337.194	610.991	688.511	521.22	292.43	606.907	-1.05214	2.63e-08	6.89e-07	Solyc08g077990.2	SL2.50ch08	61871374	61878064	-	3341	-	- && O00311.1 RecName: Full=Cell division cycle 7-related protein kinase; Short=CDC7-related kinase; Short=HsCdc7; Short=huCdc7 && PF00069:Protein kinase domain	Pkinase
Solyc06g008620.1.ITAG2.4	41.7728	135.587	92.2161	12.3914	11.9646	15.0932	89.8586	13.1498	2.77078	2.63e-08	6.9e-07	Solyc06g008620.1	SL2.50ch06	2517512	2519494	-	1983	-	- && - && PF07676:WD40-like Beta Propeller Repeat	PD40
Solyc01g081390.2.ITAG2.4	990.89	855.958	974.323	1971.19	2240.65	1504.29	940.39	1905.38	-1.01846	2.71e-08	7.07e-07	Solyc01g081390.2	SL2.50ch01	80601294	80603099	+	1806	-	- && Q9LF61.1 RecName: Full=Xylulose 5-phosphate/phosphate translocator, chloroplastic; Short=Xul-5-P/phosphate translocator; Flags: Precursor && PF03151:Triose-phosphate Transporter family	-
Solyc04g064550.1.ITAG2.4	1769.03	2290.49	2652.84	772.079	808.158	1198.4	2237.45	926.213	1.27245	2.73e-08	7.11e-07	Solyc04g064550.1	SL2.50ch04	55726990	55728681	+	1692	-	- && Q9SDQ3.1 RecName: Full=Scarecrow-like protein 1; Short=AtSCL1; AltName: Full=GRAS family protein 4; Short=AtGRAS-4 && PF03514:GRAS domain family	GRAS
Solyc12g088850.1.ITAG2.4	26.2294	70.3811	96.8735	2.85955	5.43848	8.04973	64.4947	5.44925	3.57155	2.74e-08	7.13e-07	Solyc12g088850.1	SL2.50ch12	64062722	64063015	+	294	-	- && - && -	-
Solyc03g026020.2.ITAG2.4	1468.85	1785.4	1819.17	776.845	740.721	1018.29	1691.14	845.285	1.00034	2.77e-08	7.2e-07	Solyc03g026020.2	SL2.50ch03	3430355	3432146	+	1594	-	- && Q9SCW4.1 RecName: Full=Heat stress transcription factor B-2a; Short=AtHsfB2a; AltName: Full=AtHsf-22; AltName: Full=Heat shock factor protein 6; Short=HSF 6; AltName: Full=Heat shock transcription factor 6; Short=HSTF 6 && PF00447:HSF-type DNA-binding	HSF_DNA-bind
Solyc02g069770.2.ITAG2.4	602.306	612.729	636.198	1230.56	1487.97	996.154	617.078	1238.23	-1.00442	2.78e-08	7.21e-07	Solyc02g069770.2	SL2.50ch02	39587820	39596405	+	1902	-	- && Q75LV5.1 RecName: Full=U3 snoRNP-associated protein-like YAOH; AltName: Full=Protein YAO homolog && -	-
Solyc06g063210.2.ITAG2.4	165.148	229.773	264.539	60.0506	79.4018	90.5594	219.82	76.6706	1.52137	2.81e-08	7.27e-07	Solyc06g063210.2	SL2.50ch06	39926108	39929610	+	3060	-	- && Q9C5V5.2 RecName: Full=Glutamate receptor 2.8; AltName: Full=Ligand-gated ion channel 2.8; Flags: Precursor && PF00497:Bacterial extracellular solute-binding proteins, family 3|PF01094:Receptor family ligand binding region|PF00060:Ligand-gated ion channel	ANF_receptor
Solyc01g105210.2.ITAG2.4	147.662	349.835	456.423	66.7229	68.5248	85.5283	317.973	73.592	2.11142	2.87e-08	7.43e-07	Solyc01g105210.2	SL2.50ch01	93459226	93460916	+	743	-	- && P0C7Q8.1 RecName: Full=Protein DA1; AltName: Full=Protein SUPPRESSOR OF LARGE SEED AND ORGAN PHENOTYPES OF DA1-1 1 && PF12315:Protein of unknown function (DUF3633)	-
Solyc03g116670.2.ITAG2.4	707.223	796.962	940.79	339.334	286.064	448.772	814.992	358.057	1.1862	2.98e-08	7.7e-07	Solyc03g116670.2	SL2.50ch03	65983496	65985772	+	1350	-	- && - && -	-
Solyc08g062360.2.ITAG2.4	16.5148	89.0113	100.599	0.953184	0	5.03108	68.7085	1.99475	5.09237	2.98e-08	7.7e-07	Solyc08g062360.2	SL2.50ch08	50960251	50961901	+	1564	-	- && - && PF13962:Domain of unknown function|PF12796:Ankyrin repeats (3 copies)	-
Solyc04g051820.2.ITAG2.4	1577.65	1196.48	1949.58	732.999	772.264	648.003	1574.57	717.755	1.13376	3.04e-08	7.83e-07	Solyc04g051820.2	SL2.50ch04	51131564	51134935	+	516	-	- && - && -	-
Solyc07g064350.1.ITAG2.4	590.648	579.609	612.911	1236.28	1402.04	941.818	594.389	1193.38	-1.00527	3.04e-08	7.83e-07	Solyc07g064350.1	SL2.50ch07	66538002	66539858	-	1857	-	- && Q09799.1 RecName: Full=Protein kri1 && PF05178:KRI1-like family|PF12936:KRI1-like family C-terminal	-
Solyc01g103990.2.ITAG2.4	3891.67	3329.65	2492.63	1231.51	921.278	1630.07	3237.98	1260.95	1.36036	3.3e-08	8.44e-07	Solyc01g103990.2	SL2.50ch01	92459064	92466206	-	4050	-	- && - && PF05794:T-complex protein 11	-
Solyc10g007280.2.ITAG2.4	272.009	925.304	1543.46	51.472	70.7002	74.46	913.589	65.544	3.80142	3.3e-08	8.45e-07	Solyc10g007280.2	SL2.50ch10	1683212	1684934	-	1632	-	- && Q8VZG2.1 RecName: Full=Protein HYPER-SENSITIVITY-RELATED 4; Short=AtHSR4; AltName: Full=BCS1-like protein && PF00004:ATPase family associated with various cellular activities (AAA)|PF14363:Domain associated at C-terminal with AAA	AAA
Solyc05g005170.2.ITAG2.4	84.5171	47.6107	65.2033	243.062	244.731	149.926	65.777	212.573	-1.69043	3.35e-08	8.57e-07	Solyc05g005170.2	SL2.50ch05	159155	162491	+	1815	-	- && Q949Z1.1 RecName: Full=Polygalacturonase At1g48100; Short=PG; AltName: Full=Pectinase At1g48100; Flags: Precursor && PF00295:Glycosyl hydrolases family 28	-
Solyc09g008970.1.ITAG2.4	70.9166	97.2915	106.188	263.079	309.993	191.181	91.4654	254.751	-1.47693	3.4e-08	8.67e-07	Solyc09g008970.1	SL2.50ch09	2346372	2346782	+	411	-	- && - && -	-
Solyc00g050430.2.ITAG2.4	553.733	694.495	631.54	198.262	256.696	338.088	626.59	264.349	1.24546	3.41e-08	8.7e-07	Solyc00g050430.2	SL2.50ch00	13663836	13666165	+	1385	-	- && Q9LSL1.1 RecName: Full=Transcription factor bHLH93; AltName: Full=Basic helix-loop-helix protein 93; Short=AtbHLH93; Short=bHLH 93; AltName: Full=Transcription factor EN 47; AltName: Full=bHLH transcription factor bHLH093 && PF00010:Helix-loop-helix DNA-binding domain	HLH
Solyc12g056970.1.ITAG2.4	59.2591	45.5407	27.9443	0	4.35078	4.02486	44.248	2.79188	4.01713	3.42e-08	8.72e-07	Solyc12g056970.1	SL2.50ch12	63056490	63056711	-	222	-	- && - && -	-
Solyc10g047810.1.ITAG2.4	90.3458	219.423	204.925	46.706	38.0693	39.2424	171.565	41.3393	2.05144	3.48e-08	8.86e-07	Solyc10g047810.1	SL2.50ch10	42751106	42753214	-	2109	-	- && Q9LXA5.1 RecName: Full=L-type lectin-domain containing receptor kinase IX.1; Short=LecRK-IX.1; Flags: Precursor && PF00139:Legume lectin domain|PF00069:Protein kinase domain	Pkinase
Solyc05g013750.2.ITAG2.4	1677.71	1586.68	2279.32	802.581	631.951	975.023	1847.9	803.185	1.20193	3.49e-08	8.87e-07	Solyc05g013750.2	SL2.50ch05	7063818	7066955	-	2965	-	- && Q9C5S1.1 RecName: Full=Protein-tyrosine-phosphatase MKP1; AltName: Full=Mitogen-activated protein kinase phosphatase 1; Short=AtMKP1 && PF00782:Dual specificity phosphatase, catalytic domain	DSPc
Solyc06g050810.2.ITAG2.4	641.164	1288.59	1159.69	376.508	294.765	415.567	1029.82	362.28	1.50669	3.54e-08	8.97e-07	Solyc06g050810.2	SL2.50ch06	33593346	33594851	-	962	-	- && Q9SF24.2 RecName: Full=Protein LURP-one-related 10 && PF04525:LURP-one-related	-
Solyc03g113760.2.ITAG2.4	229.265	265.999	311.113	576.676	724.405	496.064	268.792	599.049	-1.1553	3.6e-08	9.11e-07	Solyc03g113760.2	SL2.50ch03	63818753	63821847	+	1449	-	- && Q8LSZ4.1 RecName: Full=E2F transcription factor-like E2FE; AltName: Full=DP-E2F-like protein 1; AltName: Full=E2F-like repressor E2L3 && PF02319:E2F/DP family winged-helix DNA-binding domain	E2F_TDP
Solyc02g080830.1.ITAG2.4	70.9166	247.369	210.513	10.485	33.7186	29.1803	176.266	24.4613	2.85462	3.64e-08	9.2e-07	Solyc02g080830.1	SL2.50ch02	44951661	44952908	+	1248	-	- && O65451.1 RecName: Full=Probable F-box protein At4g22030 && PF14476:Petal formation-expressed	-
Solyc09g005740.1.ITAG2.4	431.329	452.302	402.397	868.351	1009.38	696.301	428.676	858.011	-1.00105	3.71e-08	9.35e-07	Solyc09g005740.1	SL2.50ch09	508767	509831	+	1065	-	- && Q9LS48.1 RecName: Full=protein SLOW GREEN 1, chloroplastic; Flags: Precursor && -	-
Solyc01g058660.1.ITAG2.4	0	0	0	26.6892	39.157	18.1119	0	27.986	-7.27869	3.81e-08	9.6e-07	Solyc01g058660.1	SL2.50ch01	67348178	67348605	-	120	-	- && - && -	-
Solyc04g050440.2.ITAG2.4	868.486	800.067	394.014	2321.96	1603.26	3354.72	687.522	2426.65	-1.81979	3.92e-08	9.85e-07	Solyc04g050440.2	SL2.50ch04	47231399	47234372	-	1867	-	- && O04161.1 RecName: Full=Ammonium transporter 1 member 2; AltName: Full=LeAMT1;2 && PF00909:Ammonium Transporter Family	Ammonium_transp
Solyc01g098520.2.ITAG2.4	103.946	48.6457	63.3403	1.90637	11.9646	11.0684	71.9775	8.31313	3.13033	3.94e-08	9.88e-07	Solyc01g098520.2	SL2.50ch01	89016401	89018544	-	313	-	- && F4JN26.2 RecName: Full=DNA mismatch repair protein MLH3; AltName: Full=MutL protein homolog 3 && -	-
Solyc10g074740.1.ITAG2.4	3075.64	4690.69	4349.99	1212.45	1182.32	2087.9	4038.78	1494.22	1.43446	3.97e-08	9.95e-07	Solyc10g074740.1	SL2.50ch10	58372988	58373587	+	600	-	- && Q09011.1 RecName: Full=Calcium-binding protein CAST && PF13499:EF-hand domain pair	-
Solyc04g007880.2.ITAG2.4	484.759	866.308	1141.99	200.169	206.662	325.008	831.019	243.946	1.76834	4.04e-08	1.01e-06	Solyc04g007880.2	SL2.50ch04	1559971	1564010	+	1468	-	- && Q8GYA4.3 RecName: Full=Cysteine-rich receptor-like protein kinase 10; Short=Cysteine-rich RLK10; AltName: Full=Receptor-like protein kinase 4; Flags: Precursor && PF07714:Protein tyrosine kinase	Pkinase_Tyr
Solyc08g008080.1.ITAG2.4	162.234	178.023	163.94	79.1143	75.051	62.3854	168.065	72.1836	1.21851	4.06e-08	1.01e-06	Solyc08g008080.1	SL2.50ch08	2554030	2554506	-	477	-	- && Q6NML0.1 RecName: Full=E3 ubiquitin-protein ligase ATL76; AltName: Full=RING-H2 finger protein ATL76; AltName: Full=RING-type E3 ubiquitin transferase ATL76 && PF13639:Ring finger domain	-
Solyc02g083700.2.ITAG2.4	0	4.14006	3.7259	47.6592	26.1047	50.3108	2.62199	41.3582	-3.9876	4.06e-08	1.01e-06	Solyc02g083700.2	SL2.50ch02	46998755	47007113	-	3279	-	- && C0HJB3.1 RecName: Full=Alpha-mannosidase; Short=JBM; Short=Jbalpha-man; Contains: RecName: Full=Alpha-mannosidase, heavy subunit; Contains: RecName: Full=Alpha-mannosidase, light subunit && PF07748:Glycosyl hydrolases family 38 C-terminal domain|PF09261:Alpha mannosidase, middle domain|PF01074:Glycosyl hydrolases family 38 N-terminal domain	-
Solyc02g081550.2.ITAG2.4	82.5742	43.4707	54.9571	3.81274	10.877	11.0684	60.334	8.58602	2.82574	4.23e-08	1.05e-06	Solyc02g081550.2	SL2.50ch02	45464011	45466700	+	2222	-	- && Q1PDW5.1 RecName: Full=ATP-dependent zinc metalloprotease FTSH 6, chloroplastic; Short=AtFTSH6; Flags: Precursor && PF00004:ATPase family associated with various cellular activities (AAA)|PF01434:Peptidase family M41	AAA
Solyc07g005040.2.ITAG2.4	25.258	48.6457	39.122	125.82	108.77	125.777	37.6752	120.122	-1.6763	4.23e-08	1.05e-06	Solyc07g005040.2	SL2.50ch07	90358	92771	-	1400	-	- && Q9SH76.1 RecName: Full=ATPase 6, plasma membrane-type; AltName: Full=Proton pump 6 && PF00122:E1-E2 ATPase|PF00690:Cation transporter/ATPase, N-terminus	E1-E2_ATPase
Solyc04g010250.2.ITAG2.4	3750.81	3107.12	2354.77	1431.68	1243.24	1594.85	3070.9	1423.26	1.10929	4.33e-08	1.08e-06	Solyc04g010250.2	SL2.50ch04	3577656	3583500	+	1060	-	- && Q9C942.1 RecName: Full=Caffeoylshikimate esterase; AltName: Full=Lysophospholipase 2; Short=LysoPL2 && PF12146:Serine aminopeptidase, S33	-
Solyc00g098560.2.ITAG2.4	509.045	441.952	458.286	198.262	172.944	268.66	469.761	213.288	1.13842	4.56e-08	1.13e-06	Solyc00g098560.2	SL2.50ch00	15691035	15692244	+	841	-	- && Q9FJ45.1 RecName: Full=GDSL esterase/lipase At5g45910; AltName: Full=Extracellular lipase At5g45910; Flags: Precursor && PF00657:GDSL-like Lipase/Acylhydrolase	Lipase_GDSL
Solyc02g077770.2.ITAG2.4	153.491	145.937	285.032	45.7528	46.7709	67.4165	194.82	53.3134	1.87045	4.66e-08	1.15e-06	Solyc02g077770.2	SL2.50ch02	42624654	42625446	+	589	-	- && - && -	-
Solyc04g007750.2.ITAG2.4	48.573	75.5561	40.0534	464.201	123.997	289.79	54.7275	292.663	-2.42191	4.71e-08	1.16e-06	Solyc04g007750.2	SL2.50ch04	1429473	1430430	+	840	-	- && P85524.1 RecName: Full=Kirola; AltName: Allergen=Act d 11 && PF00407:Pathogenesis-related protein Bet v I family	-
Solyc11g006030.1.ITAG2.4	128.233	273.244	354.892	65.7697	44.5955	69.4289	252.123	59.9314	2.07108	4.8e-08	1.18e-06	Solyc11g006030.1	SL2.50ch11	840424	841716	-	1293	-	- && Q5PNY6.1 RecName: Full=U-box domain-containing protein 21; AltName: Full=Plant U-box protein 21 && PF04564:U-box domain	U-box
Solyc04g074470.1.ITAG2.4	957.86	1682.94	1422.36	329.802	317.607	629.891	1354.39	425.767	1.66929	4.92e-08	1.21e-06	Solyc04g074470.1	SL2.50ch04	60453784	60454713	+	930	-	- && Q9FE06.1 RecName: Full=Protein EXORDIUM-like 2; Flags: Precursor && PF04674:Phosphate-induced protein 1 conserved region	-
Solyc05g041910.2.ITAG2.4	1550.45	2644.46	4540.94	707.263	704.827	1009.23	2911.95	807.108	1.85118	4.92e-08	1.21e-06	Solyc05g041910.2	SL2.50ch05	54181933	54184797	+	1668	-	- && Q9FKH6.1 RecName: Full=Cytochrome b561 and DOMON domain-containing protein At5g35735; AltName: Full=Protein b561A.tha16; Flags: Precursor && PF03188:Eukaryotic cytochrome b561|PF04526:Protein of unknown function (DUF568)	Cytochrom_B561
Solyc04g077030.2.ITAG2.4	456.587	427.461	357.687	190.637	159.891	226.399	413.912	192.309	1.10453	4.99e-08	1.22e-06	Solyc04g077030.2	SL2.50ch04	61993864	61998070	-	1959	-	- && Q3MIF4.1 RecName: Full=Xylulose kinase; Short=Xylulokinase && PF02782:FGGY family of carbohydrate kinases, C-terminal domain|PF00370:FGGY family of carbohydrate kinases, N-terminal domain	FGGY_N
Solyc12g009270.1.ITAG2.4	10.6861	39.3306	9.31476	136.305	105.506	135.839	19.7771	125.884	-2.68113	5.03e-08	1.23e-06	Solyc12g009270.1	SL2.50ch12	2546424	2546987	-	564	-	- && P17407.1 RecName: Full=21 kDa protein; AltName: Full=1.2 protein; Flags: Precursor && PF04043:Plant invertase/pectin methylesterase inhibitor	-
Solyc06g053960.2.ITAG2.4	261.323	335.345	251.498	131.539	80.4895	118.733	282.722	110.254	1.35494	5.05e-08	1.24e-06	Solyc06g053960.2	SL2.50ch06	36843611	36846535	-	892	-	- && Q9LUH8.1 RecName: Full=Heat stress transcription factor A-6b; Short=AtHsfA6b; AltName: Full=AtHsf-07 && PF00447:HSF-type DNA-binding	HSF_DNA-bind
Solyc11g018800.1.ITAG2.4	41.7728	53.8208	225.417	8.57866	9.78926	9.05594	107.004	9.14129	3.55176	5.53e-08	1.35e-06	Solyc11g018800.1	SL2.50ch11	9597159	9598442	-	960	-	- && Q02200.1 RecName: Full=Lignin-forming anionic peroxidase; Flags: Precursor && PF00141:Peroxidase	-
Solyc11g005440.1.ITAG2.4	166.12	141.797	166.734	314.551	424.201	304.883	158.217	347.878	-1.13482	5.74e-08	1.39e-06	Solyc11g005440.1	SL2.50ch11	348912	354558	+	2898	-	- && - && PF01936:NYN domain|PF12872:OST-HTH/LOTUS domain|PF14418:OST-HTH Associated domain	DUF88
Solyc01g086690.2.ITAG2.4	99.089	99.3615	158.351	361.257	304.555	264.635	118.934	310.149	-1.38122	6.17e-08	1.49e-06	Solyc01g086690.2	SL2.50ch01	81644326	81650425	-	2314	-	- && Q9FQ19.2 RecName: Full=Sister chromatid cohesion 1 protein 3; AltName: Full=SCC1 homolog 3; Short=AtRAD21-2 && PF04825:N terminus of Rad21 / Rec8 like protein|PF04824:Conserved region of Rad21 / Rec8 like protein	Rad21_Rec8_N
Solyc12g039080.1.ITAG2.4	29.1438	38.2956	15.8351	0	0	0	27.7582	0	7.21477	6.22e-08	1.5e-06	Solyc12g039080.1	SL2.50ch12	45654720	45655912	+	891	-	- && C0LGI2.1 RecName: Full=Probable LRR receptor-like serine/threonine-protein kinase At1g67720; Flags: Precursor && PF12819:Carbohydrate-binding protein of the ER	-
Solyc01g096810.2.ITAG2.4	1520.34	1853.71	2072.53	699.637	738.545	1050.49	1815.53	829.557	1.13	6.28e-08	1.51e-06	Solyc01g096810.2	SL2.50ch01	87802881	87805435	-	2074	-	- && O24606.1 RecName: Full=Protein ETHYLENE INSENSITIVE 3 && PF04873:Ethylene insensitive 3	EIN3
Solyc03g091020.1.ITAG2.4	35.944	32.0855	25.1498	134.399	122.91	76.4724	31.0598	111.26	-1.84258	6.32e-08	1.52e-06	Solyc03g091020.1	SL2.50ch03	54145663	54145992	+	330	-	- && P14009.1 RecName: Full=14 kDa proline-rich protein DC2.15; Flags: Precursor && PF14547:Hydrophobic seed protein	-
Solyc02g071800.2.ITAG2.4	1175.47	1295.84	1001.34	609.085	456.832	644.984	1157.55	570.3	1.02043	6.46e-08	1.55e-06	Solyc02g071800.2	SL2.50ch02	41149929	41157027	+	2999	-	- && C0LGG9.2 RecName: Full=Probable LRR receptor-like serine/threonine-protein kinase At1g53440; Flags: Precursor && PF00069:Protein kinase domain|PF11721:Di-glucose binding within endoplasmic reticulum	Pkinase
Solyc08g067690.1.ITAG2.4	144.748	195.618	190.952	75.3016	76.1387	68.4227	177.106	73.2876	1.27295	6.48e-08	1.55e-06	Solyc08g067690.1	SL2.50ch08	56669299	56669911	+	414	-	- && - && -	-
Solyc11g005080.1.ITAG2.4	179.72	201.828	176.049	60.0506	69.6125	93.5781	185.866	74.4137	1.32084	6.61e-08	1.58e-06	Solyc11g005080.1	SL2.50ch11	67045	69072	+	2028	-	- && - && PF07676:WD40-like Beta Propeller Repeat	PD40
Solyc12g049190.1.ITAG2.4	202.064	269.104	117.366	43.8465	23.9293	61.3792	196.178	43.0516	2.1839	6.61e-08	1.58e-06	Solyc12g049190.1	SL2.50ch12	37274132	37276878	-	2550	-	- && Q8VZG8.3 RecName: Full=MDIS1-interacting receptor like kinase 2; Short=AtMIK2; AltName: Full=Probable LRR receptor-like serine/threonine-protein kinase At4g08850; Flags: Precursor && PF08263:Leucine rich repeat N-terminal domain|PF13855:Leucine rich repeat	LRRNT_2
Solyc06g072400.1.ITAG2.4	65.0879	94.1864	26.0813	378.414	171.856	545.369	61.7852	365.213	-2.56638	6.72e-08	1.6e-06	Solyc06g072400.1	SL2.50ch06	44663868	44665891	-	951	-	- && Q9SIS4.1 RecName: Full=Type IV inositol polyphosphate 5-phosphatase 9; Short=At5PTase9 && -	-
Solyc10g008830.2.ITAG2.4	31.0867	28.9804	25.1498	113.429	106.594	71.4413	28.4057	97.1548	-1.77531	6.75e-08	1.61e-06	Solyc10g008830.2	SL2.50ch10	2891629	2896154	-	1216	-	- && Q9FJ40.1 RecName: Full=GDSL esterase/lipase At5g45960; AltName: Full=Extracellular lipase At5g45960; Flags: Precursor && PF00657:GDSL-like Lipase/Acylhydrolase	Lipase_GDSL
Solyc01g007930.2.ITAG2.4	209.836	194.583	274.785	101.038	93.5418	98.6091	226.401	97.7295	1.21247	6.81e-08	1.62e-06	Solyc01g007930.2	SL2.50ch01	2117825	2120595	-	1377	-	- && Q94C27.1 RecName: Full=F-box protein At1g70590 && -	-
Solyc02g030300.2.ITAG2.4	198.178	246.334	202.13	46.706	39.157	95.5905	215.547	60.4845	1.83159	6.91e-08	1.64e-06	Solyc02g030300.2	SL2.50ch02	25476433	25482132	+	2774	-	- && O81832.4 RecName: Full=G-type lectin S-receptor-like serine/threonine-protein kinase At4g27290; Flags: Precursor && PF08276:PAN-like domain|PF07714:Protein tyrosine kinase|PF00954:S-locus glycoprotein domain|PF01453:D-mannose binding lectin	Pkinase_Tyr
Solyc05g010470.2.ITAG2.4	634.364	831.118	653.896	340.287	304.555	402.486	706.459	349.109	1.01607	7.06e-08	1.67e-06	Solyc05g010470.2	SL2.50ch05	4706112	4707923	-	1361	-	- && - && PF06880:Protein of unknown function (DUF1262)	-
Solyc11g027840.1.ITAG2.4	160.291	196.653	182.569	27.6423	47.8586	74.46	179.838	49.987	1.84904	7.1e-08	1.68e-06	Solyc11g027840.1	SL2.50ch11	19028489	19030467	+	909	-	- && - && PF01738:Dienelactone hydrolase family	-
Solyc01g094340.2.ITAG2.4	231.208	240.124	230.074	118.195	103.331	124.771	233.802	115.432	1.0166	7.17e-08	1.69e-06	Solyc01g094340.2	SL2.50ch01	85856307	85861516	+	2511	-	- && Q9LD43.1 RecName: Full=Acetyl-coenzyme A carboxylase carboxyl transferase subunit alpha, chloroplastic; Short=ACCase subunit alpha; Short=Acetyl-CoA carboxylase carboxyltransferase subunit alpha; Flags: Precursor && PF03255:Acetyl co-enzyme A carboxylase carboxyltransferase alpha subunit	-
Solyc03g031750.1.ITAG2.4	963.689	1159.22	1286.37	506.141	524.269	673.158	1136.42	567.856	1.00096	7.25e-08	1.71e-06	Solyc03g031750.1	SL2.50ch03	4222264	4222893	+	630	-	- && Q9S9T7.2 RecName: Full=Vacuolar protein sorting-associated protein 28 homolog 2 && PF03997:VPS28 protein	-
Solyc06g076570.1.ITAG2.4	167.091	292.909	353.029	61.957	77.2264	101.628	271.01	80.2704	1.75625	7.34e-08	1.73e-06	Solyc06g076570.1	SL2.50ch06	47564101	47564565	+	465	-	- && O82012.1 RecName: Full=17.6 kDa class I heat shock protein; AltName: Full=Hsp20.0 && PF00011:Hsp20/alpha crystallin family	-
Solyc07g008280.2.ITAG2.4	468.244	706.916	526.284	243.062	226.241	292.809	567.148	254.037	1.15784	7.51e-08	1.76e-06	Solyc07g008280.2	SL2.50ch07	3049990	3051076	-	743	-	- && - && -	-
Solyc08g066310.1.ITAG2.4	204.978	265.999	171.392	90.5525	68.5248	87.5408	214.123	82.206	1.37777	7.63e-08	1.79e-06	Solyc08g066310.1	SL2.50ch08	54837985	54841017	-	2517	-	- && Q9SGP2.1 RecName: Full=Receptor-like protein kinase HSL1; AltName: Full=Protein HAESA-LIKE1; Flags: Precursor && PF00069:Protein kinase domain|PF13855:Leucine rich repeat	Pkinase
Solyc04g080200.2.ITAG2.4	275.895	328.1	332.537	616.71	753.773	532.288	312.177	634.257	-1.02223	7.83e-08	1.83e-06	Solyc04g080200.2	SL2.50ch04	64457595	64461418	+	2168	-	- && - && -	-
Solyc07g053950.1.ITAG2.4	405.099	580.644	625.952	1089.49	1325.9	1048.48	537.231	1154.62	-1.10355	8.09e-08	1.89e-06	Solyc07g053950.1	SL2.50ch07	62350472	62351014	-	543	-	- && - && -	-
Solyc02g091070.2.ITAG2.4	103.946	75.5561	133.201	21.9232	19.5785	36.2238	104.234	25.9085	2.00808	8.18e-08	1.91e-06	Solyc02g091070.2	SL2.50ch02	52490698	52492722	-	1492	-	- && Q9C994.1 RecName: Full=Protein DETOXIFICATION 14; Short=AtDTX14; AltName: Full=Multidrug and toxic compound extrusion protein 14; Short=MATE protein 14 && PF01554:MatE	MatE
Solyc06g036310.2.ITAG2.4	775.226	1202.69	1590.96	286.908	500.34	415.567	1189.62	400.938	1.56981	8.37e-08	1.95e-06	Solyc06g036310.2	SL2.50ch06	25865849	25866721	+	685	-	- && O03982.1 RecName: Full=Heavy metal-associated isoprenylated plant protein 39; Short=AtHIP39; Flags: Precursor && -	-
Solyc11g007730.1.ITAG2.4	119.49	187.338	152.762	610.038	283.888	567.506	153.196	487.144	-1.67027	8.37e-08	1.95e-06	Solyc11g007730.1	SL2.50ch11	1965559	1968416	-	1032	-	- && Q07469.1 RecName: Full=Bark storage protein A; Flags: Precursor [Populus deltoides] && PF01048:Phosphorylase superfamily	-
Solyc11g011060.1.ITAG2.4	163.205	159.392	210.513	80.0675	71.7879	72.4475	177.704	74.7676	1.24902	8.39e-08	1.95e-06	Solyc11g011060.1	SL2.50ch11	4138997	4144532	-	621	-	- && - && -	-
Solyc04g011750.2.ITAG2.4	550.818	1014.32	867.204	241.156	303.467	369.281	810.779	304.635	1.4124	8.42e-08	1.95e-06	Solyc04g011750.2	SL2.50ch04	4202674	4203920	+	622	-	- && - && -	-
Solyc01g010020.2.ITAG2.4	649.907	1099.19	761.016	183.965	249.082	387.393	836.703	273.48	1.61334	8.44e-08	1.96e-06	Solyc01g010020.2	SL2.50ch01	4657174	4658216	-	1043	-	- && Q9LI84.2 RecName: Full=Probable calcium-binding protein CML16; AltName: Full=Calmodulin-like protein 16 && PF13499:EF-hand domain pair	-
Solyc06g076050.2.ITAG2.4	899.573	2040.02	3621.58	110.569	95.7172	260.61	2187.06	155.632	3.81266	8.58e-08	1.98e-06	Solyc06g076050.2	SL2.50ch06	47223728	47226315	+	1750	-	- && Q94B55.1 RecName: Full=Putative E3 ubiquitin-protein ligase XBAT31; AltName: Full=Ankyrin repeat domain and RING finger-containing protein XBAT31; AltName: Full=Protein XB3 homolog 1 && PF12796:Ankyrin repeats (3 copies)	-
Solyc05g009590.2.ITAG2.4	201.092	152.147	108.983	445.137	324.133	506.127	154.074	425.132	-1.46537	8.89e-08	2.05e-06	Solyc05g009590.2	SL2.50ch05	3794973	3798690	+	1866	-	- && Q9LS46.1 RecName: Full=Aluminum-activated malate transporter 9; Short=AtALMT9 && PF11744:Aluminium activated malate transporter	-
Solyc03g082860.2.ITAG2.4	183.606	240.124	302.73	623.383	724.405	467.89	242.153	605.226	-1.32082	8.91e-08	2.05e-06	Solyc03g082860.2	SL2.50ch03	52745228	52748336	+	1311	-	- && Q9FNE9.1 RecName: Full=Histone-lysine N-methyltransferase ATXR6; AltName: Full=Protein SET DOMAIN GROUP 34; AltName: Full=Trithorax-related protein 6; Short=TRX-related protein 6 && PF00628:PHD-finger	PHD
Solyc08g078670.2.ITAG2.4	2655	4720.71	3672.81	1335.41	1032.22	1804.14	3682.84	1390.59	1.40494	9.31e-08	2.13e-06	Solyc08g078670.2	SL2.50ch08	62449831	62451757	+	1741	-	- && Q940R4.1 RecName: Full=Probable aspartyl protease At4g16563; Flags: Precursor && PF14541:Xylanase inhibitor C-terminal	-
Solyc01g100460.2.ITAG2.4	74.8025	178.023	97.8049	10.485	14.14	32.1989	116.877	18.9413	2.62479	9.36e-08	2.14e-06	Solyc01g100460.2	SL2.50ch01	90482849	90484121	+	1273	-	- && Q9LZP8.1 RecName: Full=bZIP transcription factor 53; Short=AtbZIP53 && PF00170:bZIP transcription factor	bZIP_1
Solyc05g009660.2.ITAG2.4	453.672	328.1	535.598	213.513	174.031	172.063	439.124	186.536	1.23507	9.61e-08	2.19e-06	Solyc05g009660.2	SL2.50ch05	3852729	3858146	-	1696	-	- && Q9SX27.1 RecName: Full=Transcription factor PERIANTHIA; AltName: Full=bZIP transcription factor 46; Short=AtbZIP46 && PF14144:Seed dormancy control|PF00170:bZIP transcription factor	bZIP_1
Solyc09g014280.1.ITAG2.4	6354.32	10503.3	5119.39	2646.04	2212.37	3226.93	7325.68	2695.12	1.44252	9.82e-08	2.24e-06	Solyc09g014280.1	SL2.50ch09	5772957	5774339	+	1383	-	- && Q9FF86.1 RecName: Full=BAHD acyltransferase DCR; AltName: Full=Protein DEFECTIVE IN CUTICULAR RIDGES; AltName: Full=Protein PERMEABLE LEAVES 3 && PF02458:Transferase family	-
Solyc02g089000.2.ITAG2.4	107.832	111.782	65.2033	11.4382	17.4031	30.1865	94.939	19.6759	2.27166	9.85e-08	2.24e-06	Solyc02g089000.2	SL2.50ch02	50903115	50910091	+	603	-	- && - && -	-
Solyc03g114960.2.ITAG2.4	483.787	471.967	417.301	64.8165	90.2787	202.249	457.685	119.115	1.94213	9.87e-08	2.24e-06	Solyc03g114960.2	SL2.50ch03	64819008	64826451	+	1655	-	- && Q7M3S9.2 RecName: Full=RING finger protein B; Short=Protein rngB && PF13418:Galactose oxidase, central domain|PF07646:Kelch motif	Kelch_2
Solyc02g073580.1.ITAG2.4	301.153	733.826	213.308	23.8296	4.35078	27.1678	416.096	18.4494	4.49136	9.88e-08	2.24e-06	Solyc02g073580.1	SL2.50ch02	41748166	41748825	+	660	-	- && Q84JC2.1 RecName: Full=Protein DOG1-like 4 && PF14144:Seed dormancy control	-
Solyc03g098300.1.ITAG2.4	43.7157	40.3656	53.0941	180.152	150.102	100.622	45.7252	143.625	-1.64987	9.91e-08	2.25e-06	Solyc03g098300.1	SL2.50ch03	60643404	60644570	+	1167	-	- && O22616.2 RecName: Full=Ornithine decarboxylase; Short=ODC; AltName: Full=LeODC && PF02784:Pyridoxal-dependent decarboxylase, pyridoxal binding domain|PF00278:Pyridoxal-dependent decarboxylase, C-terminal sheet domain	-
Solyc09g098770.1.ITAG2.4	40.8014	96.2565	35.3961	316.457	154.453	395.443	57.4846	288.784	-2.33265	1e-07	2.27e-06	Solyc09g098770.1	SL2.50ch09	71938445	71940752	+	1615	-	- && Q8VWZ7.1 RecName: Full=Geraniol 8-hydroxylase; AltName: Full=Cytochrome P450 76B6; AltName: Full=Geraniol 10-hydroxylase; Short=CrG10H && PF00067:Cytochrome P450	p450
Solyc08g005120.2.ITAG2.4	40.8014	78.6612	47.5053	3.81274	10.877	9.05594	55.6559	7.91521	2.82576	1e-07	2.27e-06	Solyc08g005120.2	SL2.50ch08	75245	78275	-	846	-	- && Q500U8.1 RecName: Full=Tetraketide alpha-pyrone reductase 1; AltName: Full=Protein DIHYDROFLAVONOL 4-REDUCTASE-LIKE 1 && -	-
Solyc04g005100.2.ITAG2.4	72.8596	156.287	111.777	285.002	317.607	409.53	113.641	337.38	-1.57138	1.02e-07	2.31e-06	Solyc04g005100.2	SL2.50ch04	80661	82139	+	1276	-	- && Q2V9B0.1 RecName: Full=Transcription factor MYB1R1; AltName: Full=Myb-related protein R1; Short=StMYB1R-1 && PF00249:Myb-like DNA-binding domain	Myb_DNA-binding
Solyc06g074340.2.ITAG2.4	254.523	195.618	152.762	600.506	433.99	440.722	200.968	491.74	-1.29187	1.09e-07	2.46e-06	Solyc06g074340.2	SL2.50ch06	45959064	45960438	-	1230	-	- && - && -	-
Solyc07g056280.2.ITAG2.4	47.6016	53.8208	88.4902	6.67229	15.2277	11.0684	63.3042	10.9895	2.53903	1.1e-07	2.48e-06	Solyc07g056280.2	SL2.50ch07	64136892	64139554	+	1252	-	- && Q93WV4.1 RecName: Full=Probable WRKY transcription factor 71; AltName: Full=WRKY DNA-binding protein 71 && PF03106:WRKY DNA -binding domain	WRKY
Solyc02g069800.1.ITAG2.4	81.6027	364.326	355.824	30.5019	45.6832	54.3356	267.251	43.5069	2.61996	1.13e-07	2.54e-06	Solyc02g069800.1	SL2.50ch02	39625504	39626511	-	1008	-	- && Q9FG13.1 RecName: Full=Probable carboxylesterase 15; AltName: Full=AtCXE15 && PF07859:alpha/beta hydrolase fold	Abhydrolase_3
Solyc06g053710.2.ITAG2.4	1097.75	1557.7	951.968	555.706	528.62	588.636	1202.47	557.654	1.1081	1.14e-07	2.56e-06	Solyc06g053710.2	SL2.50ch06	36553957	36557294	-	2782	-	- && Q0WPQ2.2 RecName: Full=Ethylene receptor 2; Short=AtETR2; AltName: Full=Protein ETHYLENE RESPONSE 2; AltName: Full=Protein ETR2 && PF01590:GAF domain|PF00512:His Kinase A (phospho-acceptor) domain|PF00072:Response regulator receiver domain	Response_reg
Solyc01g103650.2.ITAG2.4	200.121	257.719	258.019	105.803	66.3494	107.665	238.62	93.2727	1.35199	1.15e-07	2.57e-06	Solyc01g103650.2	SL2.50ch01	92197324	92203584	+	1623	-	- && Q40863.1 RecName: Full=Embryogenesis-associated protein EMB8 && PF12146:Serine aminopeptidase, S33	-
Solyc02g089170.2.ITAG2.4	196.235	157.322	122.955	451.809	343.712	338.088	158.837	377.87	-1.25154	1.15e-07	2.58e-06	Solyc02g089170.2	SL2.50ch02	51051441	51053040	+	1353	-	- && Q6Z4G3.1 RecName: Full=UDP-arabinopyranose mutase 3; Short=OsUAM3; AltName: Full=Reversibly glycosylated polypeptide 3; AltName: Full=UDP-L-arabinose mutase 3 && PF03214:Reversibly glycosylated polypeptide	-
Solyc12g056650.1.ITAG2.4	1319.24	1268.93	975.255	2455.4	2020.94	3094.11	1187.81	2523.48	-1.08736	1.16e-07	2.58e-06	Solyc12g056650.1	SL2.50ch12	62628190	62640707	-	3504	-	- && Q9SQI2.2 RecName: Full=Protein GIGANTEA && -	-
Solyc04g051470.1.ITAG2.4	68.9737	67.276	27.9443	256.407	242.556	145.901	54.7313	214.955	-1.97641	1.17e-07	2.6e-06	Solyc04g051470.1	SL2.50ch04	50582318	50582557	-	240	-	- && - && -	-
Solyc02g092090.1.ITAG2.4	644.078	538.208	312.976	135.352	139.225	213.318	498.421	162.632	1.61534	1.17e-07	2.6e-06	Solyc02g092090.1	SL2.50ch02	53299436	53300080	-	645	-	- && - && PF00170:bZIP transcription factor	bZIP_1
Solyc02g068670.1.ITAG2.4	17.4863	23.8054	31.6702	0	0	0	24.3206	0	7.02737	1.17e-07	2.6e-06	Solyc02g068670.1	SL2.50ch02	38619044	38621299	+	1704	-	- && - && PF13962:Domain of unknown function	-
Solyc01g073820.2.ITAG2.4	2023.55	1805.07	2731.09	931.261	859.279	1212.49	2186.57	1001.01	1.12724	1.18e-07	2.62e-06	Solyc01g073820.2	SL2.50ch01	81172221	81173167	-	947	-	- && - && PF07649:C1-like domain	C1_3
Solyc11g072200.1.ITAG2.4	5.82876	11.3852	2.79443	63.8633	30.4555	103.64	6.66945	65.9863	-3.32209	1.2e-07	2.67e-06	Solyc11g072200.1	SL2.50ch11	55424089	55427098	-	1059	-	- && P24397.1 RecName: Full=Hyoscyamine 6-dioxygenase; AltName: Full=Hyoscyamine 6-beta-hydroxylase && PF03171:2OG-Fe(II) oxygenase superfamily|PF14226:non-haem dioxygenase in morphine synthesis N-terminal	2OG-FeII_Oxy
Solyc02g084280.2.ITAG2.4	42.7443	28.9804	31.6702	1.90637	4.35078	3.01865	34.465	3.09193	3.49714	1.22e-07	2.69e-06	Solyc02g084280.2	SL2.50ch02	47432173	47434047	+	517	-	- && - && -	-
Solyc11g012210.1.ITAG2.4	26.2294	19.6653	7.4518	113.429	60.9109	138.858	17.7822	104.399	-2.5591	1.24e-07	2.74e-06	Solyc11g012210.1	SL2.50ch11	5118643	5119704	+	1062	-	- && Q9SV07.1 RecName: Full=Acyl-CoA--sterol O-acyltransferase 1; AltName: Full=Sterol O-acyltransferase 1 && PF13813:Membrane bound O-acyl transferase family	-
Solyc06g066110.1.ITAG2.4	25.258	47.6107	65.2033	0	0	2.01243	46.024	0.67081	6.09238	1.28e-07	2.81e-06	Solyc06g066110.1	SL2.50ch06	41443719	41444171	+	453	-	- && - && PF07911:Protein of unknown function (DUF1677)	-
Solyc12g008670.1.ITAG2.4	66.0593	57.9609	145.31	10.485	21.7539	11.0684	89.7768	14.4358	2.64718	1.28e-07	2.81e-06	Solyc12g008670.1	SL2.50ch12	2049011	2050274	+	849	-	- && Q9FKL2.1 RecName: Full=Transcription factor MYB36; AltName: Full=Myb-related protein 36; Short=AtMYB36 && PF00249:Myb-like DNA-binding domain	Myb_DNA-binding
Solyc04g011980.1.ITAG2.4	164.177	142.832	176.049	69.5825	75.051	53.3294	161.019	65.9876	1.28904	1.31e-07	2.87e-06	Solyc04g011980.1	SL2.50ch04	4339129	4341774	+	2646	-	- && Q9STE7.1 RecName: Full=Putative disease resistance RPP13-like protein 3 && PF00931:NB-ARC domain	NB-ARC
Solyc12g044940.1.ITAG2.4	376.927	434.707	892.354	136.305	147.927	208.287	567.996	164.173	1.79109	1.33e-07	2.92e-06	Solyc12g044940.1	SL2.50ch12	37589458	37590437	-	816	-	- && Q9WYG0.1 RecName: Full=Uncharacterized oxidoreductase TM_0325 && PF00106:short chain dehydrogenase	adh_short
Solyc02g094100.2.ITAG2.4	88.4029	68.311	87.5587	183.011	208.838	168.038	81.4242	186.629	-1.1939	1.36e-07	2.97e-06	Solyc02g094100.2	SL2.50ch02	54735494	54742292	+	2155	-	- && Q6GX84.1 RecName: Full=Fidgetin-like protein 1 && PF00004:ATPase family associated with various cellular activities (AAA)|PF09336:Vps4 C terminal oligomerisation domain	AAA
Solyc06g008210.2.ITAG2.4	354.583	349.835	456.423	804.488	922.366	656.053	386.947	794.302	-1.0367	1.38e-07	3.01e-06	Solyc06g008210.2	SL2.50ch06	2089179	2096386	-	2370	-	- && F4I443.1 RecName: Full=BRCA1-associated RING domain protein 1; Short=AtBARD1; AltName: Full=Protein REPRESSOR OF WUSCHEL 1 && PF00533:BRCA1 C Terminus (BRCT) domain|PF13771:PHD-like zinc-binding domain	BRCT
Solyc03g116260.2.ITAG2.4	281.724	234.949	183.501	491.843	509.041	452.797	233.391	484.561	-1.05443	1.38e-07	3.01e-06	Solyc03g116260.2	SL2.50ch03	65763864	65765282	+	1227	-	- && Q9ZSA8.1 RecName: Full=Protein DMR6-LIKE OXYGENASE 1; AltName: Full=2-oxoglutarate (2OG)-Fe(II) oxygenase-like protein DLO1; AltName: Full=Protein SENESCENCE-ASSOCIATED GENE 108; AltName: Full=Salicylate 3-hydroxylase DLO1; Short=S3H DLO1; Short=SA 3-hydroxylase DLO1; Short=Salicylic acid 3-hydroxylase DLO1 && PF03171:2OG-Fe(II) oxygenase superfamily|PF14226:non-haem dioxygenase in morphine …	2OG-FeII_Oxy
Solyc10g086150.1.ITAG2.4	578.991	577.539	643.65	1203.87	1491.23	954.899	600.06	1216.67	-1.01932	1.45e-07	3.16e-06	Solyc10g086150.1	SL2.50ch10	65078648	65080271	-	876	-	- && Q08937.1 RecName: Full=29 kDa ribonucleoprotein B, chloroplastic; AltName: Full=CP29B; Flags: Precursor && PF00076:RNA recognition motif. (a.k.a. RRM, RBD, or RNP domain)	RRM_1
Solyc02g062800.2.ITAG2.4	899.573	930.479	669.731	352.678	268.661	449.778	833.261	357.039	1.2218	1.46e-07	3.17e-06	Solyc02g062800.2	SL2.50ch02	34579515	34581731	-	1749	-	- && Q9FLS0.1 RecName: Full=F-box protein At5g07610 && -	-
Solyc10g006710.2.ITAG2.4	159.32	170.778	174.186	81.0207	69.6125	80.4973	168.094	77.0435	1.12379	1.47e-07	3.19e-06	Solyc10g006710.2	SL2.50ch10	1175054	1179926	+	2717	-	- && O81832.4 RecName: Full=G-type lectin S-receptor-like serine/threonine-protein kinase At4g27290; Flags: Precursor && PF01453:D-mannose binding lectin|PF08276:PAN-like domain|PF11883:Domain of unknown function (DUF3403)|PF00954:S-locus glycoprotein domain|PF07714:Protein tyrosine kinase	Pkinase_Tyr
Solyc06g064990.2.ITAG2.4	225.379	158.357	123.886	471.826	411.149	372.3	169.208	418.425	-1.30681	1.47e-07	3.19e-06	Solyc06g064990.2	SL2.50ch06	40529550	40531185	+	1190	-	- && Q9SSA7.2 RecName: Full=GDSL esterase/lipase 5; AltName: Full=Extracellular lipase 5; Flags: Precursor && PF00657:GDSL-like Lipase/Acylhydrolase	Lipase_GDSL
Solyc01g005090.2.ITAG2.4	53.4303	50.7158	24.2184	171.573	112.033	189.169	42.7882	157.591	-1.88519	1.47e-07	3.19e-06	Solyc01g005090.2	SL2.50ch01	82959	86723	-	1142	-	- && Q9SIS4.1 RecName: Full=Type IV inositol polyphosphate 5-phosphatase 9; Short=At5PTase9 && PF03372:Endonuclease/Exonuclease/phosphatase family	Exo_endo_phos
Solyc01g109110.2.ITAG2.4	912.202	1331.03	2123.76	470.873	365.466	591.655	1455.67	475.998	1.6125	1.5e-07	3.25e-06	Solyc01g109110.2	SL2.50ch01	96144137	96148800	-	3249	-	- && O80462.2 RecName: Full=Extra-large guanine nucleotide-binding protein 1; AltName: Full=Extra-large GTP-binding protein 1; Short=Extra-large G-protein 1 && PF00503:G-protein alpha subunit	G-alpha
Solyc07g006020.2.ITAG2.4	136.005	103.502	139.721	246.875	293.678	262.622	126.409	267.725	-1.08006	1.51e-07	3.26e-06	Solyc07g006020.2	SL2.50ch07	862865	866795	+	1368	-	- && Q84N34.1 RecName: Full=Heptahelical transmembrane protein 2; AltName: Full=PAQR family protein HHP2 && PF03006:Haemolysin-III related	-
Solyc07g065340.1.ITAG2.4	248.694	866.308	869.998	178.245	120.734	153.951	661.667	150.977	2.13105	1.52e-07	3.27e-06	Solyc07g065340.1	SL2.50ch07	67143508	67144503	-	996	-	- && Q39218.3 RecName: Full=Serine acetyltransferase 3, mitochondrial; Short=AtSAT-3; Short=AtSERAT2;2; Short=SAT-m; Flags: Precursor && PF00132:Bacterial transferase hexapeptide (six repeats)|PF06426:Serine acetyltransferase, N-terminal	Hexapep
Solyc03g114350.1.ITAG2.4	140.862	446.092	572.857	40.9869	44.5955	105.653	386.604	63.745	2.60032	1.53e-07	3.29e-06	Solyc03g114350.1	SL2.50ch03	64355556	64356425	+	870	-	- && - && PF07816:Protein of unknown function (DUF1645)	-
Solyc10g005880.2.ITAG2.4	133.09	121.097	140.653	57.1911	57.6479	46.2859	131.613	53.7083	1.29425	1.53e-07	3.29e-06	Solyc10g005880.2	SL2.50ch10	674706	683027	+	1504	-	- && Q8VYB2.1 RecName: Full=Uridine kinase-like protein 3; Includes: RecName: Full=Uridine kinase; Short=UK; Includes: RecName: Full=Putative uracil phosphoribosyltransferase; Short=UPRTase; AltName: Full=UMP pyrophosphorylase && PF14681:Uracil phosphoribosyltransferase|PF00485:Phosphoribulokinase / Uridine kinase family	-
Solyc06g008300.2.ITAG2.4	27.2009	53.8208	40.9849	5.71911	2.17539	5.03108	40.6689	4.30853	3.22062	1.54e-07	3.29e-06	Solyc06g008300.2	SL2.50ch06	2161344	2164746	-	3124	-	- && - && PF12799:Leucine Rich repeats (2 copies)|PF13855:Leucine rich repeat|PF08263:Leucine rich repeat N-terminal domain	LRRNT_2
Solyc06g051560.2.ITAG2.4	68.9737	54.8558	73.5866	17.1573	10.877	3.01865	65.8054	10.351	2.66272	1.54e-07	3.29e-06	Solyc06g051560.2	SL2.50ch06	35073087	35074488	+	290	-	- && Q6NQE2.1 RecName: Full=Probable NAD(P)H dehydrogenase (quinone) FQR1-like 1 && -	-
Solyc09g008080.2.ITAG2.4	114.632	91.0814	151.831	37.1742	44.5955	31.1927	119.181	37.6541	1.66632	1.59e-07	3.41e-06	Solyc09g008080.2	SL2.50ch09	1552112	1555112	+	761	-	- && - && -	-
Solyc11g017470.1.ITAG2.4	318.639	1721.23	1351.57	85.7866	76.1387	117.727	1130.48	93.2175	3.6	1.6e-07	3.43e-06	Solyc11g017470.1	SL2.50ch11	8422146	8423170	-	876	-	- && Q39013.2 RecName: Full=NAC domain-containing protein 2; Short=ANAC002 && PF02365:No apical meristem (NAM) protein	NAM
Solyc04g025040.1.ITAG2.4	242.865	199.758	147.173	401.291	439.429	462.859	196.599	434.526	-1.14479	1.63e-07	3.47e-06	Solyc04g025040.1	SL2.50ch04	26123355	26124068	-	714	-	- && - && -	-
Solyc03g083320.2.ITAG2.4	110.747	166.638	47.5053	543.315	306.73	538.325	108.296	462.79	-2.09783	1.63e-07	3.49e-06	Solyc03g083320.2	SL2.50ch03	53150912	53153637	+	1133	-	- && Q3HRP0.1 RecName: Full=Calcineurin B-like protein 7 && PF13499:EF-hand domain pair	-
Solyc04g071770.2.ITAG2.4	65.0879	125.237	282.237	6.67229	29.3678	20.1243	157.521	18.7215	3.08098	1.64e-07	3.5e-06	Solyc04g071770.2	SL2.50ch04	58745579	58747295	+	1421	-	- && Q70II3.2 RecName: Full=Ethylene-responsive transcription factor ERF110 && PF00847:AP2 domain	AP2
Solyc03g025340.1.ITAG2.4	1849.66	1945.83	1657.1	859.772	732.019	1131.99	1817.53	907.928	1.00099	1.67e-07	3.55e-06	Solyc03g025340.1	SL2.50ch03	2773022	2774071	-	1050	-	- && - && PF00168:C2 domain	C2
Solyc05g046290.2.ITAG2.4	27.2009	23.8054	81.9699	1.90637	2.17539	3.01865	44.3254	2.3668	4.23102	1.67e-07	3.55e-06	Solyc05g046290.2	SL2.50ch05	58485924	58488638	+	995	-	- && Q38910.1 RecName: Full=Probable xyloglucan endotransglucosylase/hydrolase protein 23; Short=At-XTH23; Short=XTH-23; Flags: Precursor && PF06955:Xyloglucan endo-transglycosylase (XET) C-terminus|PF00722:Glycosyl hydrolases family 16	-
Solyc02g071430.2.ITAG2.4	192.349	275.314	139.721	68.6293	59.8232	74.46	202.462	67.6375	1.57936	1.68e-07	3.57e-06	Solyc02g071430.2	SL2.50ch02	40882514	40884407	-	1414	-	- && Q39224.1 RecName: Full=Protein SRG1; Short=AtSRG1; AltName: Full=Protein SENESCENCE-RELATED GENE 1 && PF03171:2OG-Fe(II) oxygenase superfamily|PF14226:non-haem dioxygenase in morphine synthesis N-terminal	2OG-FeII_Oxy
Solyc06g075530.1.ITAG2.4	143.776	163.532	202.13	59.0974	55.4725	80.4973	169.813	65.0224	1.38465	1.77e-07	3.75e-06	Solyc06g075530.1	SL2.50ch06	46903859	46904062	+	204	-	- && - && -	-
Solyc06g060320.2.ITAG2.4	245.78	219.423	231.006	485.171	572.128	381.356	232.07	479.551	-1.04636	1.83e-07	3.86e-06	Solyc06g060320.2	SL2.50ch06	38290431	38294517	-	2204	-	- && Q8LLE5.1 RecName: Full=Filament-like plant protein; Short=LeFPP && PF05911:Filament-like plant protein, long coiled-coil	-
Solyc11g072740.1.ITAG2.4	186.52	218.388	208.651	423.214	537.322	352.176	204.52	437.57	-1.09679	1.86e-07	3.92e-06	Solyc11g072740.1	SL2.50ch11	55957297	55957950	+	654	-	- && - && -	-
Solyc04g071080.1.ITAG2.4	59.2591	97.2915	68.9292	270.704	159.891	219.355	75.1599	216.65	-1.53077	1.86e-07	3.92e-06	Solyc04g071080.1	SL2.50ch04	57996835	57998593	+	1440	-	- && - && -	-
Solyc04g025530.2.ITAG2.4	92.2888	131.447	523.489	28.5955	39.157	30.1865	249.075	32.6463	2.93364	1.87e-07	3.94e-06	Solyc04g025530.2	SL2.50ch04	22348272	22352834	+	1789	-	- && Q9ZPS3.1 RecName: Full=Glutamate decarboxylase 4; Short=GAD 4 && PF00282:Pyridoxal-dependent decarboxylase conserved domain	-
Solyc07g061720.2.ITAG2.4	32.0582	21.7353	68.9292	0.953184	2.17539	0	40.9076	1.04286	5.33046	1.91e-07	4.02e-06	Solyc07g061720.2	SL2.50ch07	64681316	64682722	-	1227	-	- && Q9SQ80.1 RecName: Full=Gibberellin 2-beta-dioxygenase 1; AltName: Full=GA 2-oxidase 1; AltName: Full=Gibberellin 2-beta-hydroxylase 1; AltName: Full=Gibberellin 2-oxidase 1; AltName: Full=Protein SLENDER && PF03171:2OG-Fe(II) oxygenase superfamily|PF14226:non-haem dioxygenase in morphine synthesis N-terminal	2OG-FeII_Oxy
Solyc01g109170.2.ITAG2.4	1167.7	1522.51	1074.92	632.914	381.781	598.698	1255.04	537.798	1.22168	1.92e-07	4.03e-06	Solyc01g109170.2	SL2.50ch01	96216077	96218022	+	1676	-	- && Q9XIM7.1 RecName: Full=Cold-regulated 413 plasma membrane protein 1; Short=AtCOR413-PM1; AltName: Full=WCOR413-like protein && PF05562:Cold acclimation protein WCOR413	-
Solyc06g066540.1.ITAG2.4	52.4589	39.3306	56.82	8.57866	0	7.04351	49.5365	5.20739	3.22248	1.95e-07	4.1e-06	Solyc06g066540.1	SL2.50ch06	41797600	41798178	-	579	-	- && Q9LYD3.1 RecName: Full=Dehydration-responsive element-binding protein 3; AltName: Full=Protein TINY 2 && PF00847:AP2 domain	AP2
Solyc02g082620.1.ITAG2.4	87.4315	65.206	25.1498	6.67229	6.52617	8.04973	59.2624	7.08273	3.06279	1.96e-07	4.11e-06	Solyc02g082620.1	SL2.50ch02	46263243	46265006	+	114	-	- && - && -	-
Solyc05g054860.1.ITAG2.4	792.712	1059.86	538.393	293.581	174.031	330.039	796.987	265.884	1.58256	1.99e-07	4.16e-06	Solyc05g054860.1	SL2.50ch05	64668188	64670623	+	2436	-	- && Q9LX66.1 RecName: Full=Receptor-like protein kinase HERK 1; AltName: Full=Protein HERCULES RECEPTOR KINASE 1; Flags: Precursor && PF07714:Protein tyrosine kinase|PF12819:Carbohydrate-binding protein of the ER	Pkinase_Tyr
Solyc05g006740.2.ITAG2.4	47.6016	56.9259	7.4518	276.423	187.084	244.51	37.3264	236.006	-2.66507	2e-07	4.18e-06	Solyc05g006740.2	SL2.50ch05	1379095	1381005	+	989	-	- && Q9FUS8.1 RecName: Full=Glutathione S-transferase U17; Short=AtGSTU17; AltName: Full=GST class-tau member 17; AltName: Full=Glutathione S-transferase 30; AltName: Full=Protein EARLY RESPONSIVE TO DEHYDRATION 9 && PF13417:Glutathione S-transferase, N-terminal domain|PF00043:Glutathione S-transferase, C-terminal domain	GST_C
Solyc05g015840.2.ITAG2.4	382.756	312.575	455.492	181.105	147.927	197.218	383.607	175.417	1.12848	2.01e-07	4.19e-06	Solyc05g015840.2	SL2.50ch05	12394400	12397051	+	1313	-	- && Q49I57.1 RecName: Full=Teosinte glume architecture 1 && PF03110:SBP domain	SBP
Solyc06g069710.2.ITAG2.4	38.8584	60.0309	40.0534	9.53184	1.0877	3.01865	46.3143	4.54606	3.31606	2.03e-07	4.23e-06	Solyc06g069710.2	SL2.50ch06	43419475	43420728	-	1062	-	- && Q9FLJ2.1 RecName: Full=NAC domain-containing protein 100; Short=ANAC100; Short=AtNAC5 && PF02365:No apical meristem (NAM) protein	NAM
Solyc08g077900.2.ITAG2.4	521.674	941.864	856.958	284.049	369.816	290.796	773.499	314.887	1.29707	2.03e-07	4.24e-06	Solyc08g077900.2	SL2.50ch08	61805319	61808521	+	1092	-	- && O23547.2 RecName: Full=Expansin-like B1; Short=At-EXPR1; Short=AtEXLB1; Short=AtEXPR1; AltName: Full=Ath-ExpBeta-3.1; Flags: Precursor && PF03330:Rare lipoprotein A (RlpA)-like double-psi beta-barrel|PF01357:Pollen allergen	-
Solyc03g118880.2.ITAG2.4	194.292	122.132	127.612	40.0337	42.4201	61.3792	148.012	47.9443	1.62652	2.04e-07	4.25e-06	Solyc03g118880.2	SL2.50ch03	67667368	67668406	+	365	-	- && - && -	-
Solyc00g100880.2.ITAG2.4	51.4874	76.5912	240.321	11.4382	14.14	20.1243	122.8	15.2342	3.01296	2.04e-07	4.25e-06	Solyc00g100880.2	SL2.50ch00	15777138	15778282	+	896	-	- && Q9LUM1.1 RecName: Full=Protein LURP-one-related 11 && PF04525:LURP-one-related	-
Solyc01g096200.2.ITAG2.4	1005.46	834.223	1331.08	426.073	304.555	535.307	1056.92	421.978	1.32431	2.05e-07	4.27e-06	Solyc01g096200.2	SL2.50ch01	87291000	87300253	-	4444	-	- && Q9FNN7.1 RecName: Full=Pentatricopeptide repeat-containing protein At5g08510 && PF05659:Arabidopsis broad-spectrum mildew resistance protein RPW8|PF04564:U-box domain|PF13041:PPR repeat family	U-box
Solyc02g081590.2.ITAG2.4	1078.32	1440.74	1073.06	496.609	543.848	701.332	1197.37	580.596	1.0441	2.11e-07	4.38e-06	Solyc02g081590.2	SL2.50ch02	45483078	45486035	+	2875	-	- && - && PF14826:FACT complex subunit SPT16 N-terminal lobe domain	-
Solyc01g111180.2.ITAG2.4	127.261	108.677	51.2312	14.2978	7.61387	25.1554	95.7231	15.689	2.60293	2.2e-07	4.55e-06	Solyc01g111180.2	SL2.50ch01	97311219	97525840	-	212967	-	- && Q38953.2 RecName: Full=Probable pre-mRNA-splicing factor ATP-dependent RNA helicase DEAH5; AltName: Full=DEAH RNA helicase homolog PRP22 && -	-
Solyc00g006680.1.ITAG2.4	0	0	0	20.0169	61.9986	10.0622	0	30.6926	-7.41079	2.3e-07	4.76e-06	Solyc00g006680.1	SL2.50ch00	5631469	5631876	+	228	-	- && - && -	-
Solyc01g099780.2.ITAG2.4	201.092	207.003	202.13	438.465	492.726	329.033	203.409	420.074	-1.0459	2.41e-07	4.97e-06	Solyc01g099780.2	SL2.50ch01	89920250	89922467	+	854	-	- && P43349.2 RecName: Full=Translationally-controlled tumor protein homolog; Short=TCTP; AltName: Full=p23 && PF00838:Translationally controlled tumour protein	-
Solyc09g005090.1.ITAG2.4	76.7454	75.5561	81.0384	30.5019	19.5785	20.1243	77.78	23.4016	1.72684	2.5e-07	5.13e-06	Solyc09g005090.1	SL2.50ch09	55478	58639	+	3162	-	- && - && PF08263:Leucine rich repeat N-terminal domain|PF13855:Leucine rich repeat	LRRNT_2
Solyc05g052890.2.ITAG2.4	116.575	83.8363	75.4495	9.53184	29.3678	22.1367	91.9537	20.3455	2.18639	2.54e-07	5.23e-06	Solyc05g052890.2	SL2.50ch05	63069040	63071267	-	624	-	- && - && -	-
Solyc12g008350.1.ITAG2.4	206.921	207.003	162.077	94.3652	85.9279	79.491	192	86.5947	1.14712	2.65e-07	5.44e-06	Solyc12g008350.1	SL2.50ch12	1759910	1760809	+	900	-	- && Q9LYD3.1 RecName: Full=Dehydration-responsive element-binding protein 3; AltName: Full=Protein TINY 2 && PF00847:AP2 domain	AP2
Solyc07g049660.2.ITAG2.4	140.862	300.155	133.201	35.2678	40.2447	64.3978	191.406	46.6368	2.03611	2.67e-07	5.47e-06	Solyc07g049660.2	SL2.50ch07	60025565	60027595	+	1599	-	- && Q8GT20.1 RecName: Full=Benzyl alcohol O-benzoyltransferase; AltName: Full=Benzoyl coenzyme A:benzyl alcohol benzoyl transferase && PF02458:Transferase family	-
Solyc01g103030.2.ITAG2.4	278.809	195.618	243.115	93.4121	94.6295	122.758	239.181	103.6	1.20756	2.68e-07	5.47e-06	Solyc01g103030.2	SL2.50ch01	91697125	91701757	-	2168	-	- && Q93VV5.1 RecName: Full=Protein NRT1/ PTR FAMILY 4.3; Short=AtNPF4.3; AltName: Full=Nitrate transporter 1.14 && PF00854:POT family	-
Solyc05g015420.2.ITAG2.4	1900.18	2773.84	1902.07	928.402	844.052	1231.61	2192.03	1001.35	1.13005	2.68e-07	5.47e-06	Solyc05g015420.2	SL2.50ch05	10484003	10485747	-	1558	-	- && Q9FYF9.1 RecName: Full=F-box protein At1g67340 && PF01753:MYND finger	zf-MYND
Solyc02g068170.1.ITAG2.4	26.2294	38.2956	82.9013	1.90637	3.26309	7.04351	49.1421	4.07099	3.59866	2.74e-07	5.58e-06	Solyc02g068170.1	SL2.50ch02	38195959	38196459	-	501	-	- && - && -	-
Solyc06g076130.2.ITAG2.4	488.645	867.343	691.155	196.356	163.154	330.039	682.381	229.85	1.56923	2.77e-07	5.63e-06	Solyc06g076130.2	SL2.50ch06	47269993	47272566	+	2239	-	- && F4HSD5.1 RecName: Full=Protein TRM32; AltName: Full=TON1-RECRUITING MOTIF protein 32 && PF14309:Domain of unknown function (DUF4378)	-
Solyc01g107740.2.ITAG2.4	834.485	761.772	1121.5	396.525	363.29	508.139	905.918	422.651	1.09996	2.79e-07	5.66e-06	Solyc01g107740.2	SL2.50ch01	95184929	95188059	-	1267	-	- && Q9Z1N9.2 RecName: Full=Protein unc-13 homolog B; AltName: Full=Munc13-2; Short=munc13 && PF00168:C2 domain	C2
Solyc08g036620.2.ITAG2.4	21.3721	23.8054	103.394	0	0	1.00622	49.5238	0.335405	7.09251	2.83e-07	5.74e-06	Solyc08g036620.2	SL2.50ch08	10645906	10646497	+	405	-	- && Q8LBM2.1 RecName: Full=Protein TIFY 5A; AltName: Full=Jasmonate ZIM domain-containing protein 8 && PF09425:Divergent CCT motif|PF06200:tify domain	Zim
Solyc00g005000.2.ITAG2.4	351.669	389.166	163.94	939.84	712.44	1075.64	301.591	909.308	-1.59315	2.91e-07	5.91e-06	Solyc00g005000.2	SL2.50ch00	16437	18189	+	1693	-	- && Q9LHE3.1 RecName: Full=Protein ASPARTIC PROTEASE IN GUARD CELL 2; Short=AtASPG2; Flags: Precursor && PF14541:Xylanase inhibitor C-terminal|PF14543:Xylanase inhibitor N-terminal	-
Solyc10g079780.1.ITAG2.4	382.756	545.453	343.714	88.6461	52.2094	177.094	423.974	105.983	1.99857	2.92e-07	5.92e-06	Solyc10g079780.1	SL2.50ch10	61274958	61275496	+	324	-	- && - && -	-
Solyc04g071870.1.ITAG2.4	390.527	585.819	488.093	234.483	182.733	251.554	488.146	222.923	1.12936	2.97e-07	6.02e-06	Solyc04g071870.1	SL2.50ch04	58882740	58883885	+	1146	-	- && Q9LYN8.1 RecName: Full=Leucine-rich repeat receptor protein kinase EMS1; AltName: Full=Protein EXCESS MICROSPOROCYTES 1; AltName: Full=Protein EXTRA SPOROGENOUS CELLS; Flags: Precursor && PF07714:Protein tyrosine kinase	Pkinase_Tyr
Solyc12g035400.1.ITAG2.4	116.575	150.077	135.995	260.219	250.17	295.827	134.216	268.739	-1.00276	3e-07	6.06e-06	Solyc12g035400.1	SL2.50ch12	58636304	58641563	-	1056	-	- && Q8GXB4.1 RecName: Full=WAT1-related protein At1g09380 && PF00892:EamA-like transporter family	DUF6
Solyc03g083000.2.ITAG2.4	804.369	933.584	720.962	406.057	262.135	436.698	819.639	368.296	1.15289	3e-07	6.06e-06	Solyc03g083000.2	SL2.50ch03	52846284	52848881	+	1625	-	- && - && -	-
Solyc01g112190.2.ITAG2.4	26.2294	16.5603	21.4239	83.8802	58.7356	120.746	21.4045	87.7872	-2.03505	3.07e-07	6.17e-06	Solyc01g112190.2	SL2.50ch01	98255084	98258317	+	2609	-	- && Q7X9B9.3 RecName: Full=Protein NLP2; Short=AtNLP2; AltName: Full=NIN-like protein 2; AltName: Full=Nodule inception protein-like protein 2 && PF02042:RWP-RK domain|PF00564:PB1 domain	RWP-RK
Solyc10g054440.1.ITAG2.4	4095.68	7084.68	14735.9	2175.17	2183	2640.31	8638.77	2332.83	1.88876	3.11e-07	6.23e-06	Solyc10g054440.1	SL2.50ch10	55417815	55419938	-	2124	-	- && O23141.1 RecName: Full=Arginine decarboxylase 2; Short=ADC 2; Short=ARGDC 2; AltName: Full=ADC-N && PF02784:Pyridoxal-dependent decarboxylase, pyridoxal binding domain|PF00278:Pyridoxal-dependent decarboxylase, C-terminal sheet domain	-
Solyc10g009550.2.ITAG2.4	17.4863	64.171	78.2439	1.90637	0	6.03729	53.3004	2.64789	4.3151	3.2e-07	6.4e-06	Solyc10g009550.2	SL2.50ch10	3672838	3674913	-	1444	-	- && Q9FL62.1 RecName: Full=Probable WRKY transcription factor 30; AltName: Full=WRKY DNA-binding protein 30 && PF03106:WRKY DNA -binding domain	WRKY
Solyc05g013370.1.ITAG2.4	25.258	35.1905	46.5738	1.90637	0	5.03108	35.6741	2.31248	3.92606	3.2e-07	6.4e-06	Solyc05g013370.1	SL2.50ch05	6447254	6447952	+	699	-	- && - && PF00319:SRF-type transcription factor (DNA-binding and dimerisation domain)	SRF-TF
Solyc04g016070.2.ITAG2.4	70.9166	80.7312	95.0105	177.292	168.593	209.293	82.2195	185.059	-1.16974	3.21e-07	6.41e-06	Solyc04g016070.2	SL2.50ch04	6740957	6743095	-	615	-	- && - && PF01486:K-box region	K-box
Solyc02g038740.2.ITAG2.4	255.494	260.824	435.931	114.382	137.05	120.746	317.416	124.059	1.35709	3.27e-07	6.52e-06	Solyc02g038740.2	SL2.50ch02	31491170	31494050	-	2240	-	- && P48022.1 RecName: Full=3-hydroxy-3-methylglutaryl-coenzyme A reductase 2; Short=HMG-CoA reductase 2 && PF00368:Hydroxymethylglutaryl-coenzyme A reductase	-
Solyc02g083670.2.ITAG2.4	278.809	342.59	187.227	645.306	546.023	746.612	269.542	645.98	-1.26236	3.28e-07	6.53e-06	Solyc02g083670.2	SL2.50ch02	46981841	46982562	-	654	-	- && Q9SXL4.2 RecName: Full=Histidine kinase 1; AltName: Full=Arabidopsis histidine kinase 1; Short=AtHK1; AltName: Full=Protein AUTHENTIC HIS-KINASE 1 && PF00072:Response regulator receiver domain	Response_reg
Solyc11g011580.1.ITAG2.4	131.147	131.447	196.541	309.785	337.186	361.231	153.045	336.067	-1.13289	3.3e-07	6.56e-06	Solyc11g011580.1	SL2.50ch11	4645645	4646936	-	687	-	- && Q9FMW4.1 RecName: Full=Putative GEM-like protein 8 && PF02893:GRAM domain	GRAM
Solyc10g078700.1.ITAG2.4	81.6027	76.5912	79.1754	172.526	178.382	152.945	79.1231	167.951	-1.08518	3.3e-07	6.57e-06	Solyc10g078700.1	SL2.50ch10	60429506	60434196	-	1119	-	- && Q700W2.2 RecName: Full=Squamosa promoter-binding-like protein 9 && PF03110:SBP domain	SBP
Solyc04g011520.2.ITAG2.4	920.945	1106.43	666.005	424.167	342.624	450.785	897.794	405.859	1.14455	3.32e-07	6.58e-06	Solyc04g011520.2	SL2.50ch04	3956690	3961315	+	1768	-	- && Q06548.1 RecName: Full=Protein kinase APK1A, chloroplastic; Flags: Precursor && PF00069:Protein kinase domain	Pkinase
Solyc08g082710.2.ITAG2.4	45.6587	74.5211	41.9164	168.714	130.523	158.982	54.0321	152.74	-1.50445	3.34e-07	6.62e-06	Solyc08g082710.2	SL2.50ch08	65409845	65413735	+	1421	-	- && Q9M3A3.1 RecName: Full=Protein ABIL2; AltName: Full=Abl interactor-like protein 2; Short=AtABIL2 && -	-
Solyc01g105190.2.ITAG2.4	55.3733	126.272	125.749	20.0169	26.1047	26.1616	102.465	24.0944	2.09042	3.35e-07	6.64e-06	Solyc01g105190.2	SL2.50ch01	93457263	93458084	+	266	-	- && - && -	-
Solyc02g072210.1.ITAG2.4	74.8025	189.408	114.571	10.485	9.78926	36.2238	126.261	18.8327	2.74275	3.38e-07	6.69e-06	Solyc02g072210.1	SL2.50ch02	41525346	41526023	+	678	-	- && - && -	-
Solyc05g051940.2.ITAG2.4	16.5148	21.7353	9.31476	64.8165	78.3141	57.3543	15.855	66.8283	-2.08288	3.41e-07	6.74e-06	Solyc05g051940.2	SL2.50ch05	62318546	62320466	+	1631	-	- && - && PF07690:Major Facilitator Superfamily	MFS_1
Solyc02g082630.2.ITAG2.4	253.551	175.953	68.9292	32.4083	13.0523	37.23	166.144	27.5635	2.58666	3.44e-07	6.8e-06	Solyc02g082630.2	SL2.50ch02	46266772	46270626	+	1266	-	- && Q7X911.1 RecName: Full=Phosphoinositide phosphatase SAC6; Short=AtSAC6; AltName: Full=Protein IMPAIRED IN BABA-INDUCED STERILITY 2; AltName: Full=Protein SUPPRESSOR OF ACTIN 1B; Short=AtSAC1b; AltName: Full=Protein SUPPRESSOR OF ACTIN 6; AltName: Full=SAC domain protein 6; AltName: Full=SAC1-like protein AtSAC1b && -	-
Solyc08g076860.2.ITAG2.4	2742.43	3729.16	2512.19	1185.76	1095.31	1717.61	2994.59	1332.89	1.16762	3.46e-07	6.82e-06	Solyc08g076860.2	SL2.50ch08	60768691	60770808	-	1342	-	- && - && PF04640:PLATZ transcription factor	-
Solyc09g011510.2.ITAG2.4	140.862	558.908	330.674	44.7997	68.5248	94.5843	343.481	69.3029	2.30965	3.55e-07	6.99e-06	Solyc09g011510.2	SL2.50ch09	4820455	4821500	-	839	-	- && Q03664.1 RecName: Full=Probable glutathione S-transferase; AltName: Full=Auxin-induced protein PCNT103 && PF00043:Glutathione S-transferase, C-terminal domain	GST_C
Solyc08g007820.1.ITAG2.4	110.747	160.427	393.083	32.4083	22.8416	59.3667	221.419	38.2055	2.53394	3.55e-07	7e-06	Solyc08g007820.1	SL2.50ch08	2326801	2327535	-	735	-	- && Q9FJ93.1 RecName: Full=Dehydration-responsive element-binding protein 1D; Short=Protein DREB1D; AltName: Full=C-repeat/dehydration-responsive element-binding factor 4; Short=C-repeat-binding factor 4; Short=CRT/DRE-binding factor 4 && PF00847:AP2 domain	AP2
Solyc01g091830.2.ITAG2.4	235.093	590.994	426.616	61.0038	73.9633	158.982	417.568	97.9831	2.09117	3.72e-07	7.31e-06	Solyc01g091830.2	SL2.50ch01	85381669	85383929	+	1439	-	- && - && -	-
Solyc06g008590.2.ITAG2.4	91.3173	78.6612	100.599	33.3615	33.7186	24.1492	90.1926	30.4097	1.57031	3.74e-07	7.33e-06	Solyc06g008590.2	SL2.50ch06	2498340	2501460	+	966	-	- && O24407.1 RecName: Full=Auxin-responsive protein IAA16; AltName: Full=Indoleacetic acid-induced protein 16 && PF02309:AUX/IAA family	-
Solyc01g057910.2.ITAG2.4	53.4303	75.5561	121.092	8.57866	23.9293	13.0808	83.3594	15.1963	2.46785	3.75e-07	7.35e-06	Solyc01g057910.2	SL2.50ch01	64321603	64323304	+	1308	-	- && Q9LDE1.1 RecName: Full=Transcription factor MYB108; AltName: Full=Myb-related protein 108; Short=AtMYB108; AltName: Full=Protein BOTRYTIS-SUSCEPTIBLE 1 && PF00249:Myb-like DNA-binding domain	Myb_DNA-binding
Solyc01g008520.2.ITAG2.4	155.434	132.482	203.062	75.3016	46.7709	45.2797	163.659	55.7841	1.55008	3.77e-07	7.37e-06	Solyc01g008520.2	SL2.50ch01	2620843	2629758	+	1039	-	- && Q682D3.2 RecName: Full=DNA repair protein XRCC2 homolog; AltName: Full=X-ray repair cross-complementing protein 2 homolog; Short=AtXRCC2 && -	-
Solyc12g008660.1.ITAG2.4	115.604	89.0113	162.077	24.7828	28.2801	47.2921	122.231	33.4517	1.87104	3.82e-07	7.46e-06	Solyc12g008660.1	SL2.50ch12	2038195	2039412	+	1218	-	- && O82199.1 RecName: Full=Zinc finger CCCH domain-containing protein 20; Short=AtC3H20 && PF00642:Zinc finger C-x8-C-x5-C-x3-H type (and similar)	zf-CCCH
Solyc01g091340.2.ITAG2.4	367.212	427.461	418.233	859.772	995.241	630.897	404.302	828.637	-1.03511	3.89e-07	7.59e-06	Solyc01g091340.2	SL2.50ch01	84983437	84991329	+	1842	-	- && F4J9Q6.1 RecName: Full=Peptidyl-prolyl cis-trans isomerase FKBP43; Short=PPIase FKBP43; AltName: Full=FK506-binding protein 43; Short=AtFKBP43; AltName: Full=Immunophilin FKBP43; AltName: Full=Rotamase && PF00254:FKBP-type peptidyl-prolyl cis-trans isomerase	FKBP_C
Solyc05g012180.2.ITAG2.4	62.1735	65.206	156.488	20.0169	15.2277	20.1243	94.6225	18.4563	2.3571	3.92e-07	7.63e-06	Solyc05g012180.2	SL2.50ch05	5446238	5449535	-	1272	-	- && Q9FW03.1 RecName: Full=Putative methylesterase 11, chloroplastic; Short=AtMES11; Flags: Precursor && PF12697:Alpha/beta hydrolase family	-
Solyc11g073260.1.ITAG2.4	803.398	748.316	1002.27	1595.63	2134.06	1452.98	851.327	1727.55	-1.02044	3.96e-07	7.71e-06	Solyc11g073260.1	SL2.50ch11	56274322	56274820	-	426	-	- && Q9M531.1 RecName: Full=Histone H2A && PF00125:Core histone H2A/H2B/H3/H4|PF16211:C-terminus of histone H2A	Histone
Solyc04g054690.2.ITAG2.4	3649.78	5724.67	9367.85	1902.56	1767.5	2600.06	6247.43	2090.04	1.57973	3.97e-07	7.71e-06	Solyc04g054690.2	SL2.50ch04	53051129	53053573	-	2023	-	- && P24792.2 RecName: Full=L-ascorbate oxidase; Short=ASO; Short=Ascorbase; Flags: Precursor && PF07732:Multicopper oxidase|PF07731:Multicopper oxidase|PF00394:Multicopper oxidase	-
Solyc05g050000.2.ITAG2.4	89.3744	92.1164	92.2161	187.777	214.276	170.05	91.2356	190.701	-1.06273	3.99e-07	7.73e-06	Solyc05g050000.2	SL2.50ch05	59851206	59855387	-	1020	-	- && Q6NPC9.1 RecName: Full=Probable RNA methyltransferase At5g51130 && PF06859:Bicoid-interacting protein 3 (Bin3)	-
Solyc11g007370.1.ITAG2.4	128.233	73.4861	97.8049	394.618	241.468	230.423	99.8413	288.837	-1.53231	4.02e-07	7.8e-06	Solyc11g007370.1	SL2.50ch11	1729484	1730818	+	1335	-	- && F8WKW8.1 RecName: Full=Beta-D-glucosyl crocetin beta-1,6-glucosyltransferase; AltName: Full=UDP-glucose glucosyltransferase 9; Short=GjUGT9; AltName: Full=UDP-glycosyltransferase 94E5 && PF00201:UDP-glucoronosyl and UDP-glucosyl transferase	UDPGT
Solyc01g066700.2.ITAG2.4	66.0593	69.346	62.4089	163.948	137.05	140.87	65.9381	147.289	-1.16153	4.05e-07	7.85e-06	Solyc01g066700.2	SL2.50ch01	74870101	74872103	-	625	-	- && Q8S8T4.1 RecName: Full=UDP-glucuronic acid decarboxylase 4; AltName: Full=UDP-XYL synthase 4; AltName: Full=UDP-glucuronate decarboxylase 4; Short=UGD; Short=UXS-4 && PF16363:GDP-mannose 4,6 dehydratase	-
Solyc05g054650.1.ITAG2.4	66.0593	245.299	181.638	16.2041	28.2801	41.2548	164.332	28.5797	2.52502	4.06e-07	7.85e-06	Solyc05g054650.1	SL2.50ch05	64521075	64521533	+	459	-	- && Q9SLD4.1 RecName: Full=Zinc finger protein ZAT11 && PF13912:C2H2-type zinc finger	-
Solyc06g071810.1.ITAG2.4	1781.66	3055.37	2376.19	477.545	391.57	1125.96	2404.41	665.024	1.85403	4.09e-07	7.9e-06	Solyc06g071810.1	SL2.50ch06	44234053	44235930	+	1878	-	- && Q9SKB2.1 RecName: Full=Leucine-rich repeat receptor-like serine/threonine/tyrosine-protein kinase SOBIR1; AltName: Full=Protein EVERSHED; AltName: Full=Protein SUPPRESSOR OF BIR1-1; Flags: Precursor && PF00069:Protein kinase domain	Pkinase
Solyc06g076860.2.ITAG2.4	204.978	203.898	260.813	482.311	622.162	387.393	223.23	497.289	-1.15429	4.19e-07	8.08e-06	Solyc06g076860.2	SL2.50ch06	47762991	47770026	+	1992	-	- && Q8W032.1 RecName: Full=Cell division control protein 6 homolog B; Short=AtCDC6b && PF09079:CDC6, C terminal|PF13401:AAA domain	-
Solyc02g022850.1.ITAG2.4	70.9166	108.677	54.9571	16.2041	9.78926	23.143	78.1834	16.3788	2.24762	4.29e-07	8.25e-06	Solyc02g022850.1	SL2.50ch02	24208546	24210171	-	1626	-	- && Q9SVG3.1 RecName: Full=Berberine bridge enzyme-like 21; Short=AtBBE-like 21; Flags: Precursor && PF08031:Berberine and berberine like|PF01565:FAD binding domain	FAD_binding_4
Solyc03g096540.2.ITAG2.4	2145.96	2487.14	3196.82	750.156	1328.08	1221.55	2609.97	1099.93	1.24701	4.33e-07	8.31e-06	Solyc03g096540.2	SL2.50ch03	58700501	58702104	-	828	-	- && Q9SIE7.1 RecName: Full=PLAT domain-containing protein 2; Short=AtPLAT2; Short=PLAT domain protein 2; Flags: Precursor && PF01477:PLAT/LH2 domain	-
Solyc02g087090.2.ITAG2.4	5237.14	7270.98	4209.34	2280.97	1990.48	2985.44	5572.49	2418.96	1.20381	4.4e-07	8.44e-06	Solyc02g087090.2	SL2.50ch02	49612387	49615252	+	2113	-	- && Q9SGH6.1 RecName: Full=Alpha-dioxygenase 1; Short=Alpha DOX1; AltName: Full=Fatty acid dioxygenase AlphaDOX1; AltName: Full=Pathogen-induced oxygenase; AltName: Full=Plant alpha dioxygenase 1; Flags: Precursor && PF03098:Animal haem peroxidase	An_peroxidase
Solyc10g081970.1.ITAG2.4	336.125	657.235	1096.35	94.3652	117.471	243.504	696.569	151.78	2.19846	4.48e-07	8.58e-06	Solyc10g081970.1	SL2.50ch10	62891183	62891605	-	423	-	- && Q9SJ52.1 RecName: Full=Protein YLS9; AltName: Full=Protein NDR1/HIN1-LIKE 10; Short=AtNHL10; AltName: Full=Protein YELLOW-LEAF-SPECIFIC GENE 9 && PF03168:Late embryogenesis abundant protein	-
Solyc05g009950.2.ITAG2.4	130.176	128.342	138.79	295.487	222.978	277.716	132.436	265.393	-1.00366	4.52e-07	8.65e-06	Solyc05g009950.2	SL2.50ch05	4164685	4168099	-	1003	-	- && Q9C540.1 RecName: Full=Probable transmembrane ascorbate ferrireductase 4; AltName: Full=Artb561-4; AltName: Full=Cytochrome b-561D; AltName: Full=Protein b561A.tha6 && PF03188:Eukaryotic cytochrome b561	Cytochrom_B561
Solyc03g078150.2.ITAG2.4	117.547	79.6962	79.1754	317.41	266.485	178.1	92.1395	253.999	-1.46301	4.55e-07	8.69e-06	Solyc03g078150.2	SL2.50ch03	50131086	50138379	+	2177	-	- && P47082.1 RecName: Full=Vacuolar amino acid transporter 1 && PF01490:Transmembrane amino acid transporter protein	Aa_trans
Solyc12g098320.1.ITAG2.4	453.672	456.442	297.141	906.478	721.142	968.986	402.418	865.535	-1.1058	4.6e-07	8.78e-06	Solyc12g098320.1	SL2.50ch12	65876051	65877634	-	216	-	- && P49098.1 RecName: Full=Cytochrome b5 && -	-
Solyc04g081530.1.ITAG2.4	507.102	696.566	956.625	12.3914	26.1047	89.5532	720.098	42.6831	4.07662	4.62e-07	8.81e-06	Solyc04g081530.1	SL2.50ch04	65476903	65477370	+	468	-	- && Q9FYB5.2 RecName: Full=Chaperone protein dnaJ 11, chloroplastic; Short=AtDjC11; Short=AtJ11; Flags: Precursor && PF00226:DnaJ domain	DnaJ
Solyc04g081350.2.ITAG2.4	74.8025	71.4161	67.0662	143.931	160.979	152.945	71.0949	152.618	-1.10181	4.7e-07	8.96e-06	Solyc04g081350.2	SL2.50ch04	65362143	65368564	-	1458	-	- && Q9FV70.1 RecName: Full=Transcription factor E2FC; AltName: Full=E2F transcription factor-2; Short=AtE2F2 && PF02319:E2F/DP family winged-helix DNA-binding domain|PF16421:E2F transcription factor CC-MB domain	E2F_TDP
Solyc03g116100.2.ITAG2.4	24.2865	64.171	33.5331	1.90637	2.17539	6.03729	40.6635	3.37302	3.58827	4.79e-07	9.1e-06	Solyc03g116100.2	SL2.50ch03	65609638	65611301	-	1441	-	- && P81392.1 RecName: Full=Myb-related protein 306 && PF00249:Myb-like DNA-binding domain	Myb_DNA-binding
Solyc11g011620.1.ITAG2.4	102.003	105.572	89.4217	29.5487	41.3324	38.2362	98.9989	36.3724	1.44786	4.79e-07	9.1e-06	Solyc11g011620.1	SL2.50ch11	4682646	4688264	-	645	-	- && O64527.1 RecName: Full=UPF0678 fatty acid-binding protein-like protein At1g79260 && PF08768:Domain of unknown function (DUF1794)	-
Solyc06g068890.1.ITAG2.4	47.6016	45.5407	81.9699	3.81274	14.14	10.0622	58.3707	9.33831	2.66104	4.82e-07	9.15e-06	Solyc06g068890.1	SL2.50ch06	42712651	42712896	-	246	-	- && - && -	-
Solyc05g006780.2.ITAG2.4	316.696	371.571	679.977	144.884	105.506	184.137	456.081	144.843	1.65433	4.84e-07	9.18e-06	Solyc05g006780.2	SL2.50ch05	1400482	1407165	+	2241	-	- && - && PF04601:Domain of unknown function (DUF569)	-
Solyc01g008050.2.ITAG2.4	137.947	152.147	84.7643	38.1274	32.6309	47.2921	124.953	39.3501	1.66381	4.91e-07	9.31e-06	Solyc01g008050.2	SL2.50ch01	2199131	2201264	+	1443	-	- && O04523.1 RecName: Full=Protein ALTERED XYLOGLUCAN 4; AltName: Full=Protein trichome birefringence-like 27 && PF13839:GDSL/SGNH-like Acyl-Esterase family found in Pmr5 and Cas1p|PF14416:PMR5 N terminal Domain	-
Solyc01g090760.2.ITAG2.4	2962.96	1744	4025.84	1084.72	1247.59	998.166	2910.93	1110.16	1.39092	5.18e-07	9.78e-06	Solyc01g090760.2	SL2.50ch01	84419008	84420178	+	1076	-	- && O49743.1 RecName: Full=GATA transcription factor 4; Short=AtGATA-4 && PF00320:GATA zinc finger	GATA
Solyc05g053880.2.ITAG2.4	245.78	222.528	235.663	492.796	654.793	388.399	234.657	511.996	-1.12473	5.19e-07	9.8e-06	Solyc05g053880.2	SL2.50ch05	63912200	63916475	+	1306	-	- && - && PF14617:U3-containing 90S pre-ribosomal complex subunit	-
Solyc01g090630.2.ITAG2.4	76.7454	83.8363	59.6144	207.794	142.488	189.169	73.3987	179.817	-1.2963	5.4e-07	1.01e-05	Solyc01g090630.2	SL2.50ch01	84283203	84285461	+	1160	-	- && Q944X7.1 RecName: Full=2-oxoglutarate-dependent dioxygenase AOP3 && PF03171:2OG-Fe(II) oxygenase superfamily|PF14226:non-haem dioxygenase in morphine synthesis N-terminal	2OG-FeII_Oxy
Solyc10g083210.1.ITAG2.4	151.548	133.517	395.877	45.7528	36.9816	65.404	226.981	49.3795	2.20041	5.44e-07	1.02e-05	Solyc10g083210.1	SL2.50ch10	63076400	63080922	+	927	-	- && Q9FNI3.1 RecName: Full=B3 domain-containing protein At5g06250 && PF02362:B3 DNA binding domain	B3
Solyc01g105200.2.ITAG2.4	87.4315	159.392	164.871	43.8465	22.8416	45.2797	137.232	37.3226	1.87371	5.45e-07	1.02e-05	Solyc01g105200.2	SL2.50ch01	93458357	93460308	+	664	-	- && Q8W4F0.3 RecName: Full=Protein DA1-related 1 && -	-
Solyc09g089780.2.ITAG2.4	545.961	897.359	770.33	341.24	294.765	383.368	737.883	339.791	1.1181	5.48e-07	1.03e-05	Solyc09g089780.2	SL2.50ch09	69462658	69463971	-	1153	-	- && O04847.2 RecName: Full=Deacetoxyvindoline 4-hydroxylase && PF03171:2OG-Fe(II) oxygenase superfamily|PF14226:non-haem dioxygenase in morphine synthesis N-terminal	2OG-FeII_Oxy
Solyc03g083370.2.ITAG2.4	99.089	112.817	96.8735	199.216	194.697	223.38	102.926	205.764	-1.00088	5.5e-07	1.03e-05	Solyc03g083370.2	SL2.50ch03	53217463	53219360	-	1411	-	- && Q680C0.1 RecName: Full=GDSL esterase/lipase At4g10955 && PF01764:Lipase (class 3)	Lipase_3
Solyc07g062470.2.ITAG2.4	76.7454	79.6962	47.5053	167.76	156.628	188.162	67.9823	170.85	-1.3328	5.57e-07	1.04e-05	Solyc07g062470.2	SL2.50ch07	65191291	65194319	-	917	-	- && Q9S7R3.1 RecName: Full=Protein LIGHT-DEPENDENT SHORT HYPOCOTYLS 10; AltName: Full=Protein ORGAN BOUNDARY 10 && PF04852:Protein of unknown function (DUF640)	-
Solyc07g049350.2.ITAG2.4	1444.56	1984.12	1361.82	692.012	456.832	845.221	1596.83	664.688	1.26389	5.62e-07	1.05e-05	Solyc07g049350.2	SL2.50ch07	59629263	59634372	+	2416	-	- && - && -	-
Solyc11g068710.1.ITAG2.4	178.749	363.29	364.207	66.7229	66.3494	126.783	302.082	86.6185	1.80173	5.66e-07	1.06e-05	Solyc11g068710.1	SL2.50ch11	53338463	53339068	+	606	-	- && Q9XIN8.1 RecName: Full=F-box protein At2g27310 && -	-
Solyc02g072000.2.ITAG2.4	175.834	275.314	288.757	85.7866	108.77	105.653	246.635	100.07	1.30271	5.77e-07	1.08e-05	Solyc02g072000.2	SL2.50ch02	41325300	41327107	+	1712	-	- && O49403.1 RecName: Full=Heat stress transcription factor A-4a; Short=AtHsfA4a; AltName: Full=AtHsf-15; AltName: Full=Heat shock factor protein 21; Short=HSF 21; AltName: Full=Heat shock transcription factor 21; Short=HSTF 21 && PF00447:HSF-type DNA-binding	HSF_DNA-bind
Solyc05g008540.2.ITAG2.4	124.347	138.692	154.625	282.143	353.501	247.529	139.221	294.391	-1.07894	5.86e-07	1.09e-05	Solyc05g008540.2	SL2.50ch05	2865324	2871899	+	1339	-	- && Q6EWX1.1 RecName: Full=Origin of replication complex subunit 4; Short=AtORC4 && PF14629:Origin recognition complex (ORC) subunit 4 C-terminus|PF13191:AAA ATPase domain	-
Solyc07g064820.1.ITAG2.4	333.211	775.227	321.359	162.995	138.137	132.82	476.599	144.651	1.71917	6.03e-07	1.12e-05	Solyc07g064820.1	SL2.50ch07	66805773	66807245	-	1473	-	- && Q9FZ36.1 RecName: Full=Mitogen-activated protein kinase kinase kinase 2; AltName: Full=Arabidopsis NPK1-related protein kinase 2 && PF00069:Protein kinase domain	Pkinase
Solyc11g069180.1.ITAG2.4	856.828	981.195	706.99	353.631	292.59	493.046	848.338	379.756	1.15884	6.09e-07	1.13e-05	Solyc11g069180.1	SL2.50ch11	53809179	53816307	+	1239	-	- && Q9FS87.2 RecName: Full=Isovaleryl-CoA dehydrogenase, mitochondrial; Short=IVD; AltName: Full=Isovaleryl-CoA dehydrogenase 2; Short=St-IVD2; Flags: Precursor && PF02770:Acyl-CoA dehydrogenase, middle domain|PF02771:Acyl-CoA dehydrogenase, N-terminal domain|PF00441:Acyl-CoA dehydrogenase, C-terminal domain	-
Solyc03g121090.2.ITAG2.4	787.855	1376.57	1857.36	232.577	318.695	576.562	1340.6	375.944	1.83444	6.11e-07	1.13e-05	Solyc03g121090.2	SL2.50ch03	69312279	69313323	-	827	-	- && - && -	-
Solyc02g062500.2.ITAG2.4	145.719	99.3615	117.366	264.032	289.327	228.411	120.816	260.59	-1.10747	6.23e-07	1.15e-05	Solyc02g062500.2	SL2.50ch02	34172485	34176632	+	1345	-	- && Q945B6.1 RecName: Full=Probable 2-oxoglutarate-dependent dioxygenase AOP1.2 && PF03171:2OG-Fe(II) oxygenase superfamily|PF14226:non-haem dioxygenase in morphine synthesis N-terminal	2OG-FeII_Oxy
Solyc09g082550.2.ITAG2.4	22.3436	31.0505	19.561	125.82	87.0156	63.3916	24.3184	92.0758	-1.92623	6.23e-07	1.15e-05	Solyc09g082550.2	SL2.50ch09	68266303	68272143	-	2294	-	- && Q9SV13.1 RecName: Full=Sulfate transporter 3.1; AltName: Full=AST12; AltName: Full=AtST1 && PF00916:Sulfate permease family|PF01740:STAS domain	Sulfate_transp
Solyc08g079200.1.ITAG2.4	264.237	246.334	167.666	538.549	522.094	413.555	226.079	491.399	-1.12098	6.33e-07	1.17e-05	Solyc08g079200.1	SL2.50ch08	62823262	62823669	-	408	-	- && P14009.1 RecName: Full=14 kDa proline-rich protein DC2.15; Flags: Precursor && PF14547:Hydrophobic seed protein	-
Solyc05g052650.2.ITAG2.4	63.1449	109.712	52.1626	15.2509	20.6662	15.0932	75.0064	17.0035	2.14288	6.41e-07	1.18e-05	Solyc05g052650.2	SL2.50ch05	62874392	62874973	+	526	-	- && Q9SND9.1 RecName: Full=Uncharacterized acetyltransferase At3g50280 && PF02458:Transferase family	-
Solyc02g032950.2.ITAG2.4	67.0308	85.9063	106.188	24.7828	28.2801	29.1803	86.3751	27.4144	1.65794	6.43e-07	1.19e-05	Solyc02g032950.2	SL2.50ch02	29490478	29492508	-	1526	-	- && Q9C519.1 RecName: Full=WRKY transcription factor 6; AltName: Full=WRKY DNA-binding protein 6; Short=AtWRKY6 && PF03106:WRKY DNA -binding domain	WRKY
Solyc09g007900.2.ITAG2.4	3063.99	4307.74	6079.74	1112.37	713.528	2045.64	4483.82	1290.51	1.79669	6.49e-07	1.2e-05	Solyc09g007900.2	SL2.50ch09	1419041	1422226	-	2422	-	- && P26600.1 RecName: Full=Phenylalanine ammonia-lyase; Short=PAL && PF00221:Aromatic amino acid lyase	-
Solyc01g096880.2.ITAG2.4	160.291	235.984	379.111	45.7528	98.9803	37.23	258.462	60.6544	2.09544	6.55e-07	1.21e-05	Solyc01g096880.2	SL2.50ch01	87873761	87877418	-	2032	-	- && Q9SZY4.1 RecName: Full=Protein NRT1/ PTR FAMILY 6.2; Short=AtNPF6.2; AltName: Full=Nitrate transporter 1.4 && PF00854:POT family	-
Solyc05g052980.2.ITAG2.4	357.498	669.655	558.885	232.577	205.574	233.442	528.679	223.864	1.23906	6.62e-07	1.22e-05	Solyc05g052980.2	SL2.50ch05	63149727	63151615	-	1627	-	- && P49598.1 RecName: Full=Protein phosphatase 2C 37; Short=AtPP2C37; AltName: Full=Protein ABA-HYPERSENSITIVE GERMINATION 3; AltName: Full=Protein phosphatase 2C A; Short=PP2CA && PF00481:Protein phosphatase 2C	PP2C
Solyc07g052250.2.ITAG2.4	0	1.03502	0	38.1274	16.3154	45.2797	0.345005	33.2408	-6.56986	6.67e-07	1.23e-05	Solyc07g052250.2	SL2.50ch07	60738458	60739375	-	117	-	- && - && -	-
Solyc11g007130.1.ITAG2.4	294.353	260.824	205.856	529.017	461.183	752.649	253.678	580.95	-1.19608	6.72e-07	1.23e-05	Solyc11g007130.1	SL2.50ch11	1583358	1588068	+	1326	-	- && - && PF07690:Major Facilitator Superfamily	MFS_1
Solyc07g063240.2.ITAG2.4	1157.98	1190.27	2092.09	630.055	624.337	661.084	1480.11	638.492	1.21317	6.8e-07	1.25e-05	Solyc07g063240.2	SL2.50ch07	65755895	65765336	-	2046	-	- && Q9LUQ3.1 RecName: Full=Putative nuclear RNA export factor SDE5; AltName: Full=Protein SILENCING DEFECTIVE 5 && PF08590:Domain of unknown function (DUF1771)	-
Solyc07g052950.2.ITAG2.4	191.378	276.349	189.09	398.431	472.06	550.4	218.939	473.63	-1.11429	6.83e-07	1.25e-05	Solyc07g052950.2	SL2.50ch07	61353515	61354070	-	471	-	- && - && -	-
Solyc05g025900.2.ITAG2.4	1452.33	1861.99	2269.07	754.922	775.527	1077.66	1861.13	869.369	1.09818	6.98e-07	1.28e-05	Solyc05g025900.2	SL2.50ch05	37515695	37518190	-	1285	-	- && - && -	-
Solyc05g051490.2.ITAG2.4	1532.97	1233.74	845.78	477.545	437.254	624.86	1204.16	513.22	1.23008	7.09e-07	1.29e-05	Solyc05g051490.2	SL2.50ch05	61841460	61855392	-	2927	-	- && Q54TM2.1 RecName: Full=LMBR1 domain-containing protein 2 homolog B && PF04791:LMBR1-like membrane protein	-
Solyc10g051070.1.ITAG2.4	52.4589	30.0155	24.2184	0	4.35078	3.01865	35.5642	2.45648	3.89224	7.16e-07	1.3e-05	Solyc10g051070.1	SL2.50ch10	51479301	51480102	+	480	-	- && - && -	-
Solyc01g068490.2.ITAG2.4	186.52	275.314	149.968	48.6124	40.2447	88.547	203.934	59.1347	1.78382	7.44e-07	1.34e-05	Solyc01g068490.2	SL2.50ch01	77737540	77740298	+	2604	-	- && - && PF05804:Kinesin-associated protein (KAP)	-
Solyc02g083360.1.ITAG2.4	316.696	599.274	531.873	101.038	174.031	208.287	482.614	161.118	1.58363	8.01e-07	1.44e-05	Solyc02g083360.1	SL2.50ch02	46803459	46803839	+	381	-	- && - && -	-
Solyc04g078200.2.ITAG2.4	26.2294	18.6303	20.4925	72.442	89.191	59.3667	21.7841	73.6666	-1.75483	8.07e-07	1.45e-05	Solyc04g078200.2	SL2.50ch04	63005029	63005842	+	432	-	- && Q948Z4.1 RecName: Full=Snakin-1; Flags: Precursor && -	-
Solyc07g065660.2.ITAG2.4	638.25	1032.95	1000.4	386.993	296.941	463.865	890.533	382.6	1.21824	8.09e-07	1.45e-05	Solyc07g065660.2	SL2.50ch07	67345821	67349669	-	2396	-	- && Q8VZK9.1 RecName: Full=Cellulose synthase-like protein E1; Short=AtCslE1 && PF03552:Cellulose synthase	-
Solyc02g092460.2.ITAG2.4	5152.63	8345.33	8265.91	2281.92	2179.74	3975.56	7254.62	2812.41	1.36706	8.12e-07	1.45e-05	Solyc02g092460.2	SL2.50ch02	53510609	53512205	+	1049	-	- && Q9FJX5.1 RecName: Full=BTB/POZ and TAZ domain-containing protein 4; AltName: Full=BTB and TAZ domain protein 4 && PF00651:BTB/POZ domain|PF02135:TAZ zinc finger	zf-TAZ
Solyc11g013250.1.ITAG2.4	44.6872	116.957	128.544	20.9701	11.9646	23.143	96.7292	18.6926	2.36667	8.24e-07	1.47e-05	Solyc11g013250.1	SL2.50ch11	6158380	6158859	+	480	-	- && - && PF00168:C2 domain	C2
Solyc05g008360.1.ITAG2.4	534.303	944.969	819.699	183.011	169.68	379.343	766.324	244.012	1.65063	8.29e-07	1.48e-05	Solyc05g008360.1	SL2.50ch05	2720439	2720873	+	435	-	- && - && -	-
Solyc06g083120.1.ITAG2.4	80.6312	111.782	49.3682	195.403	233.855	259.604	80.5937	229.62	-1.51354	8.32e-07	1.48e-05	Solyc06g083120.1	SL2.50ch06	48668544	48668801	-	258	-	- && - && -	-
Solyc12g010410.1.ITAG2.4	729.567	1094.01	853.232	336.474	294.765	507.133	892.27	379.457	1.23301	8.64e-07	1.54e-05	Solyc12g010410.1	SL2.50ch12	3455837	3459360	+	990	-	- && O22300.1 RecName: Full=Homeobox protein knotted-1-like LET12 && PF03791:KNOX2 domain|PF03790:KNOX1 domain|PF05920:Homeobox KN domain	Coprinus_mating
Solyc12g055920.1.ITAG2.4	67.0308	105.572	94.079	212.56	203.399	184.137	88.8938	200.032	-1.17137	8.67e-07	1.54e-05	Solyc12g055920.1	SL2.50ch12	61915436	61918489	+	681	-	- && O81223.3 RecName: Full=Calcineurin B-like protein 4; AltName: Full=Protein SALT OVERLY SENSITIVE 3 && PF13499:EF-hand domain pair	-
Solyc01g109120.2.ITAG2.4	220.522	368.466	277.58	125.82	122.91	132.82	288.856	127.183	1.18245	8.68e-07	1.54e-05	Solyc01g109120.2	SL2.50ch01	96152983	96154941	-	1870	-	- && Q7Z4S6.2 RecName: Full=Kinesin-like protein KIF21A; AltName: Full=Kinesin-like protein KIF2; AltName: Full=Renal carcinoma antigen NY-REN-62 && -	-
Solyc12g038370.1.ITAG2.4	231.208	152.147	223.554	435.605	477.498	370.287	202.303	427.797	-1.07881	8.7e-07	1.54e-05	Solyc12g038370.1	SL2.50ch12	48168358	48173683	-	690	-	- && Q84J78.1 RecName: Full=Single-stranded DNA-binding protein, mitochondrial; Flags: Precursor && PF00436:Single-strand binding protein family	-
Solyc10g084680.1.ITAG2.4	432.3	474.037	144.379	1357.33	956.084	1417.76	350.239	1243.73	-1.82898	8.78e-07	1.56e-05	Solyc10g084680.1	SL2.50ch10	64120778	64122139	+	1362	-	- && Q9SL95.1 RecName: Full=Molybdate transporter 1; AltName: Full=Sulfate transporter like protein 5.2 && PF16983:Molybdate transporter of MFS superfamily	-
Solyc08g029000.2.ITAG2.4	3315.6	6496.79	4522.31	443.231	368.729	1162.18	4778.23	658.046	2.86015	8.91e-07	1.58e-05	Solyc08g029000.2	SL2.50ch08	38906886	38910679	-	2619	-	- && Q43191.1 RecName: Full=Probable linoleate 9S-lipoxygenase 5; AltName: Full=Leaf lipoxygenase && PF00305:Lipoxygenase|PF01477:PLAT/LH2 domain	Lipoxygenase
Solyc02g037540.1.ITAG2.4	43.7157	43.4707	35.3961	5.71911	8.70156	9.05594	40.8608	7.82554	2.39005	8.94e-07	1.58e-05	Solyc02g037540.1	SL2.50ch02	31080754	31083828	+	3075	-	- && O64973.2 RecName: Full=Disease resistance protein RPS5; AltName: Full=Resistance to Pseudomonas syringae protein 5; AltName: Full=pNd3/pNd10 && PF00931:NB-ARC domain|PF13855:Leucine rich repeat	NB-ARC
Solyc07g041830.2.ITAG2.4	525.56	663.445	1062.81	216.373	284.976	341.107	750.606	280.819	1.41905	8.97e-07	1.58e-05	Solyc07g041830.2	SL2.50ch07	54170341	54174622	+	1107	-	- && - && -	-
Solyc07g055630.2.ITAG2.4	45.6587	94.1864	171.392	8.57866	6.52617	25.1554	103.746	13.4201	2.94859	8.97e-07	1.58e-05	Solyc07g055630.2	SL2.50ch07	63593008	63595531	-	1330	-	- && Q8RWZ5.1 RecName: Full=G-type lectin S-receptor-like serine/threonine-protein kinase SD2-5; AltName: Full=S-domain-2 (SD2) receptor kinase 5; Short=SD2-5; Flags: Precursor && PF01453:D-mannose binding lectin|PF00069:Protein kinase domain	Pkinase
Solyc03g117420.2.ITAG2.4	4705.76	4723.81	2634.21	1346.85	772.264	1872.57	4021.26	1330.56	1.59541	8.98e-07	1.58e-05	Solyc03g117420.2	SL2.50ch03	66554722	66569270	-	2034	-	- && - && PF13855:Leucine rich repeat	-
Solyc06g007960.2.ITAG2.4	2.91438	0	3.7259	31.4551	23.9293	33.2051	2.21343	29.5298	-3.70838	9.53e-07	1.68e-05	Solyc06g007960.2	SL2.50ch06	1816553	1820314	+	1308	-	- && Q8W013.1 RecName: Full=Caffeic acid 3-O-methyltransferase; Short=CAOMT; Short=COMT; AltName: Full=S-adenosysl-L-methionine:caffeic acid 3-O-methyltransferase && PF08100:Dimerisation domain|PF00891:O-methyltransferase	-
Solyc02g078870.1.ITAG2.4	244.808	155.252	587.761	49.5656	90.2787	74.46	329.274	71.4348	2.20694	9.73e-07	1.7e-05	Solyc02g078870.1	SL2.50ch02	43514508	43514660	+	153	-	- && - && -	-
Solyc01g005160.2.ITAG2.4	49.5445	65.206	83.8328	15.2509	17.4031	20.1243	66.1944	17.5928	1.91402	9.85e-07	1.72e-05	Solyc01g005160.2	SL2.50ch01	137781	139489	+	1709	-	- && Q5PNY6.1 RecName: Full=U-box domain-containing protein 21; AltName: Full=Plant U-box protein 21 && PF04564:U-box domain	U-box
Solyc02g092490.2.ITAG2.4	138.919	135.587	208.651	338.38	344.799	335.07	161.052	339.417	-1.07367	1.01e-06	1.76e-05	Solyc02g092490.2	SL2.50ch02	53545308	53547848	-	1761	-	- && Q42381.1 RecName: Full=Probable N-acetyltransferase HLS1; AltName: Full=Protein CONSTITUTIVE PHOTOMORPHOGENIC 3; AltName: Full=Protein HOOKLESS 1; AltName: Full=Protein UNUSUAL SUGAR RESPONSE 2 && PF00583:Acetyltransferase (GNAT) family	Acetyltransf_1
Solyc10g081630.1.ITAG2.4	170.006	184.233	196.541	360.304	477.498	309.914	183.593	382.572	-1.05812	1.02e-06	1.77e-05	Solyc10g081630.1	SL2.50ch10	62672736	62675296	+	1530	-	- && Q67XX3.1 RecName: Full=F-box protein At5g06550 && PF13621:Cupin-like domain	-
Solyc06g036170.1.ITAG2.4	1089.01	1804.03	1032.07	423.214	315.432	654.04	1308.37	464.229	1.49436	1.02e-06	1.77e-05	Solyc06g036170.1	SL2.50ch06	25637986	25639782	+	1797	-	- && Q9FYR7.1 RecName: Full=Scarecrow-like protein 8; Short=AtSCL8; AltName: Full=GRAS family protein 30; Short=AtGRAS-30 && PF03514:GRAS domain family	GRAS
Solyc02g067700.1.ITAG2.4	151.548	209.073	128.544	56.2379	46.7709	74.46	163.055	59.1562	1.45979	1.03e-06	1.8e-05	Solyc02g067700.1	SL2.50ch02	37829513	37830025	-	513	-	- && Q9XF63.1 RecName: Full=RING-H2 finger protein ATL3; AltName: Full=RING-type E3 ubiquitin transferase ATL3 && PF13639:Ring finger domain	-
Solyc01g080010.2.ITAG2.4	1680.63	2457.13	2330.55	1159.07	762.474	1127.97	2156.1	1016.5	1.08441	1.05e-06	1.83e-05	Solyc01g080010.2	SL2.50ch01	79139189	79140725	-	1537	-	- && P13917.2 RecName: Full=Basic 7S globulin; AltName: Full=SBg7S; Short=Bg; Contains: RecName: Full=Basic 7S globulin high kDa subunit; Contains: RecName: Full=Basic 7S globulin low kDa subunit; Flags: Precursor && PF14541:Xylanase inhibitor C-terminal|PF14543:Xylanase inhibitor N-terminal	-
Solyc10g086500.1.ITAG2.4	198.178	116.957	155.556	381.274	374.167	299.852	156.897	351.764	-1.16364	1.06e-06	1.84e-05	Solyc10g086500.1	SL2.50ch10	65304702	65305475	+	774	-	- && Q5K2N1.1 RecName: Full=Steroid 5-alpha-reductase DET2; Short=LeDET2 && PF02544:3-oxo-5-alpha-steroid 4-dehydrogenase	-
Solyc09g018040.1.ITAG2.4	149.605	123.167	150.899	68.6293	63.0863	53.3294	141.224	61.6817	1.19533	1.06e-06	1.84e-05	Solyc09g018040.1	SL2.50ch09	12693829	12695864	+	360	-	- && - && -	-
Solyc01g108620.2.ITAG2.4	734.424	755.561	1260.29	342.193	284.976	466.884	916.757	364.684	1.3298	1.08e-06	1.86e-05	Solyc01g108620.2	SL2.50ch01	95873918	95877777	+	1859	-	- && - && PF05705:Eukaryotic protein of unknown function (DUF829)	-
Solyc07g055640.1.ITAG2.4	27.2009	55.8908	111.777	2.85955	11.9646	6.03729	64.9563	6.95383	3.24103	1.09e-06	1.88e-05	Solyc07g055640.1	SL2.50ch07	63597005	63603617	+	2466	-	- && Q8RWZ5.1 RecName: Full=G-type lectin S-receptor-like serine/threonine-protein kinase SD2-5; AltName: Full=S-domain-2 (SD2) receptor kinase 5; Short=SD2-5; Flags: Precursor && PF01453:D-mannose binding lectin|PF00069:Protein kinase domain	Pkinase
Solyc02g084960.1.ITAG2.4	197.207	204.933	257.087	95.3184	79.4018	118.733	219.742	97.8179	1.16675	1.12e-06	1.92e-05	Solyc02g084960.1	SL2.50ch02	47994502	47995251	-	750	-	- && - && -	-
Solyc06g075690.2.ITAG2.4	143.776	448.162	1245.38	17.1573	22.8416	45.2797	612.44	28.4262	4.42949	1.13e-06	1.93e-05	Solyc06g075690.2	SL2.50ch06	47037633	47040552	+	1693	-	- && Q9LX14.1 RecName: Full=Protein UPSTREAM OF FLC && PF06136:Domain of unknown function (DUF966)	-
Solyc03g032210.2.ITAG2.4	1960.41	2166.29	1491.29	697.731	436.166	998.166	1872.66	710.688	1.39738	1.13e-06	1.94e-05	Solyc03g032210.2	SL2.50ch03	4714979	4718022	+	2112	-	- && Q9SEY5.1 RecName: Full=Probable acyl-activating enzyme 2; AltName: Full=AMP-binding protein 2; Short=AtAMPBP2 && PF13193:AMP-binding enzyme C-terminal domain|PF00501:AMP-binding enzyme	AMP-binding
Solyc04g007130.1.ITAG2.4	334.182	726.581	702.333	176.339	192.522	255.579	587.699	208.147	1.49746	1.16e-06	1.98e-05	Solyc04g007130.1	SL2.50ch04	845520	846077	-	558	-	- && - && -	-
Solyc01g088620.2.ITAG2.4	53.4303	63.136	65.2033	145.837	190.347	119.74	60.5899	151.975	-1.32516	1.17e-06	2e-05	Solyc01g088620.2	SL2.50ch01	83375686	83378707	+	839	-	- && - && -	-
Solyc01g067540.1.ITAG2.4	33.0297	38.2956	42.8479	102.944	174.031	89.5532	38.0577	122.176	-1.6799	1.19e-06	2.02e-05	Solyc01g067540.1	SL2.50ch01	76297173	76298138	+	966	-	- && Q6J9Q2.2 RecName: Full=Ethylene-responsive transcription factor ERF086 && PF00847:AP2 domain	AP2
Solyc12g009520.1.ITAG2.4	452.701	428.496	435.931	191.59	145.751	263.629	439.043	200.323	1.1309	1.21e-06	2.05e-05	Solyc12g009520.1	SL2.50ch12	2776577	2779468	-	2850	-	- && - && PF08263:Leucine rich repeat N-terminal domain|PF13855:Leucine rich repeat	LRRNT_2
Solyc08g083110.2.ITAG2.4	239.951	238.054	532.804	118.195	108.77	98.6091	336.936	108.525	1.63497	1.25e-06	2.11e-05	Solyc08g083110.2	SL2.50ch08	65670223	65673810	+	1655	-	- && Q9SGU9.1 RecName: Full=Methionine gamma-lyase; Short=AtMGL; AltName: Full=L-methioninase && PF01053:Cys/Met metabolism PLP-dependent enzyme	Cys_Met_Meta_PP
Solyc04g009440.2.ITAG2.4	287.552	842.503	2465.62	55.2847	64.174	91.5656	1198.56	70.3414	4.09088	1.25e-06	2.11e-05	Solyc04g009440.2	SL2.50ch04	2856469	2858639	+	1320	-	- && Q9C598.1 RecName: Full=Protein ATAF2; AltName: Full=NAC domain-containing protein 81; Short=ANAC081 && PF02365:No apical meristem (NAM) protein	NAM
Solyc02g090560.2.ITAG2.4	250.637	184.233	197.473	69.5825	34.8063	94.5843	210.781	66.3243	1.66501	1.26e-06	2.13e-05	Solyc02g090560.2	SL2.50ch02	52096750	52099686	-	2845	-	- && Q9LIK7.1 RecName: Full=Putative calcium-transporting ATPase 13, plasma membrane-type; AltName: Full=Ca(2+)-ATPase isoform 13 && PF00689:Cation transporting ATPase, C-terminus	Cation_ATPase_C
Solyc03g098210.2.ITAG2.4	823.799	1087.8	826.219	376.508	292.59	533.294	912.606	400.797	1.18641	1.26e-06	2.13e-05	Solyc03g098210.2	SL2.50ch03	60560083	60573948	-	2485	-	- && Q9LD37.1 RecName: Full=Probable cyclic nucleotide-gated ion channel 20, chloroplastic; AltName: Full=Cyclic nucleotide-binding transporter 1; Flags: Precursor && PF00520:Ion transport protein	Ion_trans
Solyc03g078780.1.ITAG2.4	12.629	7.24511	9.31476	76.2547	38.0693	42.2611	9.72962	52.195	-2.42336	1.27e-06	2.14e-05	Solyc03g078780.1	SL2.50ch03	51452795	51453565	-	771	-	- && Q9FI98.1 RecName: Full=UDP-glycosyltransferase 76C4 && PF00201:UDP-glucoronosyl and UDP-glucosyl transferase	UDPGT
Solyc11g010500.1.ITAG2.4	2699.69	5777.46	6534.3	1670.93	1590.21	2199.59	5003.82	1820.24	1.45888	1.27e-06	2.14e-05	Solyc11g010500.1	SL2.50ch11	3562962	3563936	-	975	-	- && Q9SJY5.1 RecName: Full=Mitochondrial uncoupling protein 5; Short=AtPUMP5; AltName: Full=Mitochondrial dicarboxylate carrier 1 && PF00153:Mitochondrial carrier protein	Mito_carr
Solyc05g015480.2.ITAG2.4	89.3744	126.272	64.2718	266.892	195.785	272.684	93.306	245.12	-1.39703	1.28e-06	2.15e-05	Solyc05g015480.2	SL2.50ch05	10696907	10698635	+	1304	-	- && - && -	-
Solyc07g053550.1.ITAG2.4	398.299	1134.38	897.011	146.79	180.557	326.014	809.896	217.787	1.89477	1.29e-06	2.17e-05	Solyc07g053550.1	SL2.50ch07	61974258	61974704	+	447	-	- && Q9SGP6.1 RecName: Full=Glutaredoxin-C9; Short=AtGrxC9; AltName: Full=Protein ROXY 19 && PF00462:Glutaredoxin	-
Solyc03g082890.2.ITAG2.4	129.204	123.167	159.282	51.472	52.2094	68.4227	137.218	57.368	1.25894	1.34e-06	2.25e-05	Solyc03g082890.2	SL2.50ch03	52784413	52787212	+	949	-	- && P81760.2 RecName: Full=Thylakoid lumenal 17.4 kDa protein, chloroplastic; AltName: Full=P17.4; Flags: Precursor && PF13599:Pentapeptide repeats (9 copies)	-
Solyc04g039980.2.ITAG2.4	128.233	166.638	133.201	71.4888	47.8586	54.3356	142.69	57.8944	1.29659	1.35e-06	2.26e-05	Solyc04g039980.2	SL2.50ch04	12314449	12315701	+	1203	-	- && - && -	-
Solyc02g030480.2.ITAG2.4	20.4007	48.6457	16.7666	121.054	88.1033	153.951	28.6043	121.036	-2.08882	1.36e-06	2.27e-05	Solyc02g030480.2	SL2.50ch02	26208508	26212516	+	1293	-	- && Q7XWU3.2 RecName: Full=Probable cinnamyl alcohol dehydrogenase 6; Short=OsCAD6 && PF00107:Zinc-binding dehydrogenase|PF08240:Alcohol dehydrogenase GroES-like domain	ADH_N
Solyc10g085950.1.ITAG2.4	113.661	115.922	68.9292	237.343	208.838	256.585	99.5039	234.255	-1.2379	1.37e-06	2.29e-05	Solyc10g085950.1	SL2.50ch10	64960607	64964048	+	795	-	- && Q9ZUT3.1 RecName: Full=Protein ALUMINUM SENSITIVE 3; AltName: Full=ABC transporter I family member 16; Short=ABC transporter ABCI.16; Short=AtABCI16; AltName: Full=ybbM homolog protein && PF03649:Uncharacterised protein family (UPF0014)	-
Solyc07g016190.1.ITAG2.4	22.3436	18.6303	3.7259	84.8334	72.8756	78.4848	14.8999	78.7313	-2.40933	1.38e-06	2.3e-05	Solyc07g016190.1	SL2.50ch07	6442099	6442465	-	195	-	- && - && -	-
Solyc04g016060.1.ITAG2.4	337.097	422.286	233.8	794.956	614.548	822.078	331.061	743.861	-1.1692	1.43e-06	2.38e-05	Solyc04g016060.1	SL2.50ch04	6734758	6735603	-	846	-	- && O22227.1 RecName: Full=Protein MIZU-KUSSEI 1 && PF04759:Protein of unknown function, DUF617	-
Solyc09g075920.1.ITAG2.4	135.033	187.338	169.529	54.3315	36.9816	79.491	163.966	56.9347	1.5229	1.43e-06	2.38e-05	Solyc09g075920.1	SL2.50ch09	67547655	67550015	-	2361	-	- && Q7FAZ3.1 RecName: Full=G-type lectin S-receptor-like serine/threonine-protein kinase LECRK1; Short=OsLecRK1; AltName: Full=OsRLCK134; Flags: Precursor && PF01453:D-mannose binding lectin|PF00069:Protein kinase domain|PF00954:S-locus glycoprotein domain	Pkinase
Solyc12g096840.1.ITAG2.4	39.8299	106.607	76.381	13.3446	9.78926	20.1243	74.2725	14.4194	2.36008	1.46e-06	2.42e-05	Solyc12g096840.1	SL2.50ch12	65599549	65600393	-	708	-	- && Q9ZV06.1 RecName: Full=Probable acetyltransferase NATA1-like && PF00583:Acetyltransferase (GNAT) family	Acetyltransf_1
Solyc10g009170.1.ITAG2.4	26.2294	18.6303	11.1777	0	0	0	18.6791	0	6.64466	1.5e-06	2.47e-05	Solyc10g009170.1	SL2.50ch10	3168005	3172774	+	1215	-	- && - && PF05212:Protein of unknown function (DUF707)	-
Solyc09g056360.2.ITAG2.4	544.989	637.57	910.052	309.785	294.765	370.287	697.537	324.946	1.10221	1.5e-06	2.48e-05	Solyc09g056360.2	SL2.50ch09	48843828	48845934	+	1534	-	- && Q9LSE7.1 RecName: Full=Cytochrome b561 and DOMON domain-containing protein At3g25290; AltName: Full=Protein b561A.tha3; Flags: Precursor && PF03188:Eukaryotic cytochrome b561|PF04526:Protein of unknown function (DUF568)	Cytochrom_B561
Solyc01g112000.2.ITAG2.4	1356.16	2238.74	3045.93	673.901	688.511	1072.63	2213.61	811.679	1.44743	1.55e-06	2.55e-05	Solyc01g112000.2	SL2.50ch01	98135694	98137583	+	1032	-	- && Q9LZT4.1 RecName: Full=Expansin-like A1; Short=At-EXPL1; Short=AtEXLA1; Short=AtEXPL1; AltName: Full=Ath-ExpBeta-2.1; Flags: Precursor && PF01357:Pollen allergen|PF03330:Rare lipoprotein A (RlpA)-like double-psi beta-barrel	-
Solyc04g007320.1.ITAG2.4	223.436	310.505	340.92	101.038	76.1387	150.932	291.62	109.37	1.41358	1.61e-06	2.65e-05	Solyc04g007320.1	SL2.50ch04	1035526	1040396	+	3288	-	- && Q40392.1 RecName: Full=TMV resistance protein N && PF00931:NB-ARC domain|PF01582:TIR domain	TIR
Solyc06g059880.2.ITAG2.4	1067.64	1335.17	567.269	396.525	241.468	390.412	990.025	342.802	1.52922	1.63e-06	2.67e-05	Solyc06g059880.2	SL2.50ch06	37781458	37783992	-	2279	-	- && P09342.1 RecName: Full=Acetolactate synthase 1, chloroplastic; AltName: Full=ALS I; AltName: Full=Acetohydroxy-acid synthase I; AltName: Full=Acetolactate synthase I; Flags: Precursor && PF02775:Thiamine pyrophosphate enzyme, C-terminal TPP binding domain|PF02776:Thiamine pyrophosphate enzyme, N-terminal TPP binding domain|PF00205:Thiamine pyrophosphate enzyme, central domain	TPP_enzyme_N
Solyc12g098410.1.ITAG2.4	42.7443	43.4707	27.0128	108.663	115.296	88.547	37.7426	104.169	-1.46772	1.71e-06	2.79e-05	Solyc12g098410.1	SL2.50ch12	65923983	65925707	+	597	-	- && O65399.3 RecName: Full=Glucan endo-1,3-beta-glucosidase 1; AltName: Full=(1->3)-beta-glucan endohydrolase 1; Short=(1->3)-beta-glucanase 1; AltName: Full=Beta-1,3-endoglucanase 1; Short=Beta-1,3-glucanase 1; Flags: Precursor && PF07983:X8 domain	-
Solyc01g067360.2.ITAG2.4	418.7	272.209	342.783	146.79	164.242	183.131	344.564	164.721	1.06572	1.72e-06	2.8e-05	Solyc01g067360.2	SL2.50ch01	75813721	75818158	-	1162	-	- && Q8VZK0.1 RecName: Full=E3 ubiquitin-protein ligase MIEL1; AltName: Full=MYB30-interacting E3 ligase 1 && PF00097:Zinc finger, C3HC4 type (RING finger)|PF05495:CHY zinc finger|PF14599:Zinc-ribbon	zf-CHY
Solyc12g099140.1.ITAG2.4	178.749	210.108	746.112	0	5.43848	11.0684	378.323	5.50228	6.10715	1.75e-06	2.85e-05	Solyc12g099140.1	SL2.50ch12	66402871	66404530	+	903	-	- && Q9LDE1.1 RecName: Full=Transcription factor MYB108; AltName: Full=Myb-related protein 108; Short=AtMYB108; AltName: Full=Protein BOTRYTIS-SUSCEPTIBLE 1 && PF00249:Myb-like DNA-binding domain	Myb_DNA-binding
Solyc06g054640.1.ITAG2.4	71.8881	146.972	83.8328	17.1573	20.6662	36.2238	100.898	24.6824	2.03031	1.76e-06	2.86e-05	Solyc06g054640.1	SL2.50ch06	37393281	37394600	+	669	-	- && - && PF04720:PDDEXK-like family of unknown function	-
Solyc12g099130.1.ITAG2.4	12.629	37.2606	176.049	2.85955	3.26309	6.03729	75.3128	4.05331	4.21704	1.77e-06	2.87e-05	Solyc12g099130.1	SL2.50ch12	66395516	66396421	+	708	-	- && Q9LDE1.1 RecName: Full=Transcription factor MYB108; AltName: Full=Myb-related protein 108; Short=AtMYB108; AltName: Full=Protein BOTRYTIS-SUSCEPTIBLE 1 && PF00249:Myb-like DNA-binding domain	Myb_DNA-binding
Solyc07g063860.2.ITAG2.4	63.1449	46.5757	58.683	148.697	112.033	139.864	56.1345	133.531	-1.24979	1.78e-06	2.89e-05	Solyc07g063860.2	SL2.50ch07	66226267	66227350	+	682	-	- && - && PF04398:Protein of unknown function, DUF538	-
Solyc02g082420.2.ITAG2.4	317.668	366.396	576.583	170.62	171.856	196.212	420.216	179.563	1.22717	1.79e-06	2.9e-05	Solyc02g082420.2	SL2.50ch02	46111647	46113558	-	1009	-	- && Q8LC69.2 RecName: Full=RING-H2 finger protein ATL8; AltName: Full=RING-type E3 ubiquitin transferase ATL8 && PF13639:Ring finger domain	-
Solyc10g085170.1.ITAG2.4	89.3744	52.7858	97.8049	326.942	200.136	181.119	79.9884	236.066	-1.55999	1.8e-06	2.92e-05	Solyc10g085170.1	SL2.50ch10	64446310	64448855	+	774	-	- && Q9SRM5.1 RecName: Full=GDSL esterase/lipase CPRD49; AltName: Full=Extracellular lipase CPRD49; Flags: Precursor && PF00657:GDSL-like Lipase/Acylhydrolase	Lipase_GDSL
Solyc12g088360.1.ITAG2.4	247.722	359.15	467.601	122.961	94.6295	173.069	358.158	130.22	1.45889	1.81e-06	2.93e-05	Solyc12g088360.1	SL2.50ch12	63773253	63774828	+	828	-	- && - && PF00514:Armadillo/beta-catenin-like repeat	Arm
Solyc12g094640.1.ITAG2.4	19.4292	25.8754	37.259	0	0	1.00622	27.5212	0.335405	6.24425	1.86e-06	3.01e-05	Solyc12g094640.1	SL2.50ch12	64811931	64814993	+	1353	-	- && P12859.2 RecName: Full=Glyceraldehyde-3-phosphate dehydrogenase B, chloroplastic; AltName: Full=NADP-dependent glyceraldehydephosphate dehydrogenase subunit B; Flags: Precursor && PF00044:Glyceraldehyde 3-phosphate dehydrogenase, NAD binding domain|PF02800:Glyceraldehyde 3-phosphate dehydrogenase, C-terminal domain	-
Solyc12g089160.1.ITAG2.4	41.7728	51.7508	40.9849	6.67229	11.9646	11.0684	44.8362	9.90177	2.18639	1.87e-06	3.01e-05	Solyc12g089160.1	SL2.50ch12	64268523	64271474	-	2670	-	- && C0LGK4.1 RecName: Full=Probable LRR receptor-like serine/threonine-protein kinase At2g16250; Flags: Precursor && PF13855:Leucine rich repeat|PF07714:Protein tyrosine kinase|PF08263:Leucine rich repeat N-terminal domain	Pkinase_Tyr
Solyc12g057060.1.ITAG2.4	1397.93	2695.18	2711.53	1008.47	771.176	1049.48	2268.21	943.043	1.26596	1.88e-06	3.04e-05	Solyc12g057060.1	SL2.50ch12	63125394	63127026	-	1461	-	- && F8WKW1.1 RecName: Full=7-deoxyloganetin glucosyltransferase; AltName: Full=Genipin glucosyltransferase; AltName: Full=UDP-glucose glucosyltransferase 2; Short=GjUGT2; AltName: Full=UDP-glycosyltransferase 85A24 && PF00201:UDP-glucoronosyl and UDP-glucosyl transferase	UDPGT
Solyc11g040340.1.ITAG2.4	674.194	473.002	401.466	1175.28	937.593	1092.75	516.221	1068.54	-1.04988	1.88e-06	3.04e-05	Solyc11g040340.1	SL2.50ch11	37862898	37865065	+	1440	-	- && Q2V4L8.2 RecName: Full=Endoglucanase 3; AltName: Full=Cellulase 5; Short=AtCEL5; AltName: Full=Endo-1,4-beta glucanase 3; Flags: Precursor && PF00759:Glycosyl hydrolase family 9	-
Solyc10g051080.1.ITAG2.4	33.0297	34.1555	16.7666	0	0	1.00622	27.9839	0.335405	6.26511	1.91e-06	3.07e-05	Solyc10g051080.1	SL2.50ch10	51489622	51489810	-	189	-	- && - && -	-
Solyc02g077370.1.ITAG2.4	32.0582	72.4511	186.295	11.4382	8.70156	17.1057	96.9348	12.4151	2.96357	1.91e-06	3.07e-05	Solyc02g077370.1	SL2.50ch02	42323150	42323635	-	486	-	- && O04681.1 RecName: Full=Pathogenesis-related genes transcriptional activator PTI5; AltName: Full=PTO-interacting protein 5 && PF00847:AP2 domain	AP2
Solyc08g065670.2.ITAG2.4	21.3721	39.3306	11.1777	101.038	78.3141	128.796	23.9601	102.716	-2.10861	1.94e-06	3.12e-05	Solyc08g065670.2	SL2.50ch08	53898837	53900646	+	1176	-	- && Q9XGZ9.2 RecName: Full=Probable protein phosphatase 2C 72; Short=AtPP2C72 && PF00481:Protein phosphatase 2C	PP2C
Solyc01g107310.2.ITAG2.4	132.119	149.042	312.044	60.0506	57.6479	63.3916	197.735	60.3634	1.71263	1.97e-06	3.16e-05	Solyc01g107310.2	SL2.50ch01	94889294	94892499	+	1929	-	- && O81760.1 RecName: Full=Probable protein phosphatase 2C 63; Short=AtPP2C63 && -	-
Solyc06g071820.2.ITAG2.4	225.379	368.466	532.804	136.305	102.243	150.932	375.549	129.827	1.53178	1.98e-06	3.17e-05	Solyc06g071820.2	SL2.50ch06	44239402	44242925	-	1486	-	- && Q9FMK7.1 RecName: Full=BTB/POZ and TAZ domain-containing protein 1; AltName: Full=BTB and TAZ domain protein 1 && PF02135:TAZ zinc finger|PF00651:BTB/POZ domain	zf-TAZ
Solyc02g067350.2.ITAG2.4	27.2009	61.0659	29.8072	6.67229	2.17539	5.03108	39.358	4.62625	3.06903	1.98e-06	3.17e-05	Solyc02g067350.2	SL2.50ch02	37554650	37557757	+	2239	-	- && - && PF07891:Protein of unknown function (DUF1666)	-
Solyc10g008730.2.ITAG2.4	310.867	508.193	564.474	154.416	189.259	227.405	461.178	190.36	1.2771	1.99e-06	3.18e-05	Solyc10g008730.2	SL2.50ch10	2802327	2803208	-	365	-	- && - && -	-
Solyc04g072890.2.ITAG2.4	821.856	874.588	606.391	340.287	293.678	455.816	767.612	363.26	1.07865	2.02e-06	3.23e-05	Solyc04g072890.2	SL2.50ch04	59845183	59850611	+	1610	-	- && Q9Y7K5.2 RecName: Full=Uncharacterized WD repeat-containing protein C2A9.03 && -	-
Solyc10g080050.1.ITAG2.4	115.604	163.532	170.46	63.8633	65.2617	63.3916	149.865	64.1722	1.22386	2.04e-06	3.25e-05	Solyc10g080050.1	SL2.50ch10	61454979	61455746	+	768	-	- && O22227.1 RecName: Full=Protein MIZU-KUSSEI 1 && PF04759:Protein of unknown function, DUF617	-
Solyc05g009000.2.ITAG2.4	23.3151	24.8404	32.6016	2.85955	1.0877	3.01865	26.919	2.32197	3.51783	2.07e-06	3.3e-05	Solyc05g009000.2	SL2.50ch05	3182173	3184337	+	1457	-	- && P0C5E2.3 RecName: Full=LEAF RUST 10 DISEASE-RESISTANCE LOCUS RECEPTOR-LIKE PROTEIN KINASE-like 1.2; AltName: Full=Probable receptor-like serine/threonine-protein kinase LRK10L-1.2; Flags: Precursor && PF14380:Wall-associated receptor kinase C-terminal	-
Solyc10g086380.1.ITAG2.4	68.0023	65.206	49.3682	14.2978	10.877	22.1367	60.8588	15.7705	1.94317	2.08e-06	3.31e-05	Solyc10g086380.1	SL2.50ch10	65222229	65223770	+	1542	-	- && Q7Y1B6.1 RecName: Full=DELLA protein GAI; AltName: Full=Gibberellic acid-insensitive mutant protein && PF03514:GRAS domain family	GRAS
Solyc03g115850.2.ITAG2.4	109.775	180.093	248.704	56.2379	63.0863	62.3854	179.524	60.5699	1.56874	2.08e-06	3.31e-05	Solyc03g115850.2	SL2.50ch03	65450452	65452010	-	1365	-	- && Q9FLJ2.1 RecName: Full=NAC domain-containing protein 100; Short=ANAC100; Short=AtNAC5 && PF02365:No apical meristem (NAM) protein	NAM
Solyc01g110570.2.ITAG2.4	26.2294	15.5252	22.3554	96.2716	78.3141	54.3356	21.37	76.3071	-1.83362	2.1e-06	3.33e-05	Solyc01g110570.2	SL2.50ch01	97225774	97226418	-	469	-	- && O65695.1 RecName: Full=Auxin-responsive protein SAUR50; AltName: Full=Protein SMALL AUXIN UP RNA 50 && PF02519:Auxin responsive protein	Auxin_inducible
Solyc09g091000.2.ITAG2.4	12.629	81.7662	29.8072	0.953184	1.0877	0	41.4008	0.680293	5.9343	2.11e-06	3.34e-05	Solyc09g091000.2	SL2.50ch09	70360338	70361437	+	793	-	- && P17642.1 RecName: Full=Pathogenesis-related protein STH-2 && PF00407:Pathogenesis-related protein Bet v I family	-
Solyc03g115870.2.ITAG2.4	1540.74	2338.1	2997.49	920.776	849.49	1199.41	2292.11	989.892	1.2113	2.12e-06	3.35e-05	Solyc03g115870.2	SL2.50ch03	65472035	65473596	+	1248	-	- && Q9XFI1.1 RecName: Full=Thioredoxin-like 1-2, chloroplastic; AltName: Full=Atypical cysteine/histidine-rich thioredoxin 5; Short=AtACHT5; AltName: Full=Lilium-type thioredoxin 1-2; Flags: Precursor && PF00085:Thioredoxin	-
Solyc12g096480.1.ITAG2.4	57.3162	53.8208	58.683	182.058	194.697	99.6154	56.6067	158.79	-1.48708	2.12e-06	3.35e-05	Solyc12g096480.1	SL2.50ch12	65382204	65382662	-	459	-	- && Q9SW07.1 RecName: Full=Protein GLUTAMINE DUMPER 2 && -	-
Solyc09g011190.1.ITAG2.4	329.325	422.286	516.969	161.088	172.944	236.461	422.86	190.164	1.15323	2.13e-06	3.37e-05	Solyc09g011190.1	SL2.50ch09	4543217	4543528	+	312	-	- && - && -	-
Solyc11g062400.1.ITAG2.4	147.662	166.638	250.567	81.9738	72.8756	74.46	188.289	76.4365	1.30083	2.16e-06	3.41e-05	Solyc11g062400.1	SL2.50ch11	49403389	49406397	+	1191	-	- && O49840.1 RecName: Full=Protein kinase 2B, chloroplastic; Flags: Precursor && PF00069:Protein kinase domain	Pkinase
Solyc07g053220.1.ITAG2.4	374.012	473.002	516.969	180.152	165.33	269.666	454.661	205.049	1.14841	2.17e-06	3.42e-05	Solyc07g053220.1	SL2.50ch07	61667346	61669808	+	2463	-	- && O64477.1 RecName: Full=G-type lectin S-receptor-like serine/threonine-protein kinase At2g19130; Flags: Precursor && PF08276:PAN-like domain|PF01453:D-mannose binding lectin|PF00069:Protein kinase domain|PF00954:S-locus glycoprotein domain	Pkinase
Solyc04g077620.1.ITAG2.4	128.233	331.205	449.903	21.9232	39.157	96.5967	303.114	52.559	2.5284	2.18e-06	3.42e-05	Solyc04g077620.1	SL2.50ch04	62576498	62576872	+	375	-	- && - && -	-
Solyc01g100980.2.ITAG2.4	10.6861	25.8754	4.65738	105.803	47.8586	112.696	13.7396	88.7861	-2.70423	2.18e-06	3.43e-05	Solyc01g100980.2	SL2.50ch01	90853500	90856129	-	1901	-	- && Q949Z1.1 RecName: Full=Polygalacturonase At1g48100; Short=PG; AltName: Full=Pectinase At1g48100; Flags: Precursor && PF00295:Glycosyl hydrolases family 28	-
Solyc08g076870.1.ITAG2.4	130.176	367.431	301.798	50.5188	54.3848	101.628	266.468	68.8438	1.95212	2.2e-06	3.45e-05	Solyc08g076870.1	SL2.50ch08	60793724	60794461	+	738	-	- && - && -	-
Solyc06g083130.2.ITAG2.4	65.0879	102.467	57.7515	175.386	169.68	228.411	75.102	191.159	-1.35137	2.23e-06	3.49e-05	Solyc06g083130.2	SL2.50ch06	48672541	48674031	-	641	-	- && Q9QY93.1 RecName: Full=dCTP pyrophosphatase 1; AltName: Full=Deoxycytidine-triphosphatase 1; Short=dCTPase 1; AltName: Full=RS21-C6; AltName: Full=XTP3-transactivated gene A protein homolog && PF03819:MazG nucleotide pyrophosphohydrolase domain	-
Solyc01g067660.2.ITAG2.4	585.791	720.371	1323.63	294.534	279.538	392.424	876.596	322.165	1.44424	2.34e-06	3.66e-05	Solyc01g067660.2	SL2.50ch01	76553513	76556684	+	2200	-	- && Q8VYW2.1 RecName: Full=Inactive beta-amylase 9; AltName: Full=1,4-alpha-D-glucan maltohydrolase; AltName: Full=Inactive beta-amylase 3 && PF01373:Glycosyl hydrolase family 14	-
Solyc06g061020.2.ITAG2.4	2193.56	3300.66	2471.2	1018	1017	1609.95	2655.14	1214.98	1.12773	2.43e-06	3.79e-05	Solyc06g061020.2	SL2.50ch06	39015502	39017378	-	1638	-	- && O81851.1 RecName: Full=E3 ubiquitin-protein ligase BOI; AltName: Full=Inhibitor of apoptosis (IAP)-like protein; Short=AtILP; AltName: Full=Protein BOTRYTIS SUSCEPTIBLE 1 INTERACTOR; Short=AtBOI; AltName: Full=RING-type E3 ubiquitin transferase BOI && PF13920:Zinc finger, C3HC4 type (RING finger)	-
Solyc06g051620.2.ITAG2.4	606.191	785.577	580.309	229.717	181.645	378.337	657.359	263.233	1.31953	2.44e-06	3.8e-05	Solyc06g051620.2	SL2.50ch06	35169806	35176840	-	2074	-	- && Q39033.1 RecName: Full=Phosphoinositide phospholipase C 2; AltName: Full=Phosphoinositide phospholipase PLC2; Short=AtPLC2; Short=PI-PLC2 && PF00388:Phosphatidylinositol-specific phospholipase C, X domain|PF00387:Phosphatidylinositol-specific phospholipase C, Y domain|PF09279:Phosphoinositide-specific phospholipase C, efhand-like|PF00168:C2 domain	PI-PLC-X
Solyc02g072080.1.ITAG2.4	1261.93	3143.34	1554.63	449.903	452.481	891.507	1986.63	597.964	1.73203	2.47e-06	3.84e-05	Solyc02g072080.1	SL2.50ch02	41352040	41354214	-	2175	-	- && Q9C7R6.1 RecName: Full=U-box domain-containing protein 17; AltName: Full=Plant U-box protein 17 && PF00514:Armadillo/beta-catenin-like repeat|PF04564:U-box domain	U-box
Solyc12g010570.1.ITAG2.4	1273.59	1915.81	1157.82	666.276	652.617	794.91	1449.07	704.601	1.03992	2.48e-06	3.85e-05	Solyc12g010570.1	SL2.50ch12	3547559	3549840	+	813	-	- && Q9SUD4.1 RecName: Full=Tetraspanin-7 && PF00335:Tetraspanin family	Tetraspannin
Solyc01g008560.2.ITAG2.4	1137.58	1107.47	1867.61	623.383	544.935	719.444	1370.89	629.254	1.12343	2.49e-06	3.86e-05	Solyc01g008560.2	SL2.50ch01	2656473	2664287	-	1910	-	- && Q56YN3.2 RecName: Full=NAD(H) kinase 1; Short=AtNADK-1 && PF01513:ATP-NAD kinase	NAD_kinase
Solyc01g107510.2.ITAG2.4	1155.07	940.829	688.36	421.307	320.87	505.12	928.085	415.766	1.15785	2.56e-06	3.95e-05	Solyc01g107510.2	SL2.50ch01	95028456	95044153	+	3894	-	- && A3EWL3.1 RecName: Full=DNA repair protein REV1; Short=AtREV1; AltName: Full=Rev1-like terminal deoxycytidyl transferase && PF00533:BRCA1 C Terminus (BRCT) domain|PF00817:impB/mucB/samB family|PF11799:impB/mucB/samB family C-terminal domain	IMS
Solyc01g100010.2.ITAG2.4	42.7443	103.502	130.407	14.2978	22.8416	22.1367	92.2175	19.7587	2.22656	2.56e-06	3.96e-05	Solyc01g100010.2	SL2.50ch01	90088144	90090143	-	1080	-	- && O80494.2 RecName: Full=F-box protein PP2-B15; AltName: Full=Protein PHLOEM PROTEIN 2-LIKE B15; Short=AtPP2-B15 && PF14299:Phloem protein 2	-
Solyc06g051800.2.ITAG2.4	99.089	155.252	150.899	253.547	358.939	294.821	135.08	302.436	-1.16228	2.6e-06	4e-05	Solyc06g051800.2	SL2.50ch06	35478007	35479822	-	1474	-	- && Q852A1.1 RecName: Full=Expansin-A7; AltName: Full=Alpha-expansin-7; AltName: Full=OsEXP7; AltName: Full=OsEXPA7; AltName: Full=OsaEXPa1.26; Flags: Precursor && PF01357:Pollen allergen|PF03330:Rare lipoprotein A (RlpA)-like double-psi beta-barrel	-
Solyc06g075270.2.ITAG2.4	33.0297	7.24511	19.561	0	0	0	19.9453	0	6.74218	2.61e-06	4.03e-05	Solyc06g075270.2	SL2.50ch06	46710473	46712438	-	1639	-	- && Q9SK09.1 RecName: Full=Vicilin-like seed storage protein At2g28490; AltName: Full=Globulin At2g28490; Flags: Precursor && PF00190:Cupin	-
Solyc08g066770.2.ITAG2.4	220.522	586.854	361.413	101.038	83.7525	160.995	389.596	115.262	1.756	2.65e-06	4.08e-05	Solyc08g066770.2	SL2.50ch08	55598947	55604243	-	2143	-	- && A2CIR5.1 RecName: Full=Ankyrin repeat-containing protein NPR4; Short=OsNPR4 && PF12796:Ankyrin repeats (3 copies)|PF13962:Domain of unknown function	-
Solyc02g080850.1.ITAG2.4	66.0593	109.712	235.663	36.221	29.3678	22.1367	137.145	29.2418	2.22941	2.67e-06	4.11e-05	Solyc02g080850.1	SL2.50ch02	44964986	44966254	+	1269	-	- && O65451.1 RecName: Full=Probable F-box protein At4g22030 && PF14476:Petal formation-expressed	-
Solyc10g052750.1.ITAG2.4	316.696	215.283	122.023	75.3016	55.4725	73.4537	218.001	68.0759	1.67719	2.74e-06	4.2e-05	Solyc10g052750.1	SL2.50ch10	53347017	53347205	-	189	-	- && - && -	-
Solyc06g069820.2.ITAG2.4	111.718	97.2915	134.132	262.126	313.256	197.218	114.381	257.533	-1.16873	2.78e-06	4.25e-05	Solyc06g069820.2	SL2.50ch06	43475379	43476456	+	878	-	- && - && PF05056:Protein of unknown function (DUF674)	-
Solyc01g098910.2.ITAG2.4	611.049	564.084	911.915	286.908	258.871	387.393	695.682	311.058	1.16131	2.84e-06	4.33e-05	Solyc01g098910.2	SL2.50ch01	89275749	89279955	-	1395	-	- && B6ZJZ9.1 RecName: Full=Peroxisomal adenine nucleotide carrier 1; Short=GmPNC1 && PF00153:Mitochondrial carrier protein	Mito_carr
Solyc04g076610.1.ITAG2.4	183.606	226.668	203.993	95.3184	87.0156	117.727	204.756	100.02	1.03211	2.86e-06	4.36e-05	Solyc04g076610.1	SL2.50ch04	61498911	61501822	-	1410	-	- && Q9S784.1 RecName: Full=HVA22-like protein c; Short=AtHVA22c && PF13456:Reverse transcriptase-like|PF03134:TB2/DP1, HVA22 family|PF12874:Zinc-finger of C2H2 type	TB2_DP1_HVA22
Solyc03g120290.2.ITAG2.4	319.611	428.496	204.925	781.611	648.266	816.041	317.677	748.64	-1.23796	2.86e-06	4.36e-05	Solyc03g120290.2	SL2.50ch03	68730234	68731262	-	780	-	- && - && -	-
Solyc04g080330.2.ITAG2.4	27.2009	27.9454	19.561	0.953184	1.0877	1.00622	24.9024	1.0157	4.6179	2.9e-06	4.41e-05	Solyc04g080330.2	SL2.50ch04	64553548	64554942	+	1147	-	- && Q9FX85.1 RecName: Full=Peroxidase 10; Short=Atperox P10; AltName: Full=ATP5a; Flags: Precursor && PF00141:Peroxidase	-
Solyc02g086590.2.ITAG2.4	495.445	862.168	547.708	170.62	132.699	322.995	635.107	208.771	1.60429	2.98e-06	4.52e-05	Solyc02g086590.2	SL2.50ch02	49245804	49249742	-	2496	-	- && Q9FNE1.1 RecName: Full=Cysteine-rich receptor-like protein kinase 42; Short=Cysteine-rich RLK42; Flags: Precursor && PF01657:Salt stress response/antifungal|PF07714:Protein tyrosine kinase	Pkinase_Tyr
Solyc09g008760.1.ITAG2.4	46.6301	57.9609	77.3125	4.76592	16.3154	16.0995	60.6345	12.3936	2.30238	3e-06	4.54e-05	Solyc09g008760.1	SL2.50ch09	2190939	2191652	+	714	-	- && - && PF05678:VQ motif	-
Solyc12g042480.1.ITAG2.4	1344.5	2142.48	1364.61	719.654	432.903	823.084	1617.2	658.547	1.29556	3.01e-06	4.56e-05	Solyc12g042480.1	SL2.50ch12	40096542	40098149	+	1491	-	- && H2DH18.1 RecName: Full=Cytochrome P450 CYP736A12 [Panax ginseng] && PF00067:Cytochrome P450	p450
Solyc11g066100.1.ITAG2.4	18.4578	31.0505	29.8072	81.9738	90.2787	67.4165	26.4385	79.8897	-1.59568	3.06e-06	4.62e-05	Solyc11g066100.1	SL2.50ch11	51773141	51775439	-	1965	-	- && P09189.1 RecName: Full=Heat shock cognate 70 kDa protein && PF00012:Hsp70 protein	HSP70
Solyc01g079570.2.ITAG2.4	273.952	285.664	195.61	433.699	493.814	611.779	251.742	513.097	-1.02807	3.2e-06	4.81e-05	Solyc01g079570.2	SL2.50ch01	78640979	78646642	+	2575	-	- && Q94KD8.1 RecName: Full=Probable beta-D-xylosidase 2; Short=AtBXL2; Flags: Precursor && PF01915:Glycosyl hydrolase family 3 C-terminal domain|PF14310:Fibronectin type III-like domain|PF00933:Glycosyl hydrolase family 3 N terminal domain	Glyco_hydro_3_C
Solyc01g010420.2.ITAG2.4	51.4874	71.4161	38.1905	4.76592	1.0877	14.087	53.698	6.64688	3.00291	3.21e-06	4.82e-05	Solyc01g010420.2	SL2.50ch01	5333994	5334862	+	741	-	- && - && PF04601:Domain of unknown function (DUF569)	-
Solyc09g082870.1.ITAG2.4	1576.68	1877.52	916.572	5.71911	7.61387	84.5221	1456.92	32.6184	5.4808	3.25e-06	4.87e-05	Solyc09g082870.1	SL2.50ch09	68548530	68551766	-	3237	-	- && Q9LIK7.1 RecName: Full=Putative calcium-transporting ATPase 13, plasma membrane-type; AltName: Full=Ca(2+)-ATPase isoform 13 && PF00690:Cation transporter/ATPase, N-terminus|PF00702:haloacid dehalogenase-like hydrolase|PF00122:E1-E2 ATPase|PF00689:Cation transporting ATPase, C-terminus	E1-E2_ATPase
Solyc11g068620.1.ITAG2.4	61.202	138.692	177.912	23.8296	19.5785	42.2611	125.935	28.5564	2.13942	3.29e-06	4.92e-05	Solyc11g068620.1	SL2.50ch11	53267076	53269318	-	783	-	- && Q9FMR3.1 RecName: Full=NAC domain-containing protein 90; Short=ANAC090 && PF02365:No apical meristem (NAM) protein	NAM
Solyc04g007400.2.ITAG2.4	116.575	154.217	81.9699	316.457	244.731	265.641	117.587	275.61	-1.23197	3.36e-06	5.01e-05	Solyc04g007400.2	SL2.50ch04	1086733	1089646	-	1019	-	- && P50164.1 RecName: Full=Tropinone reductase 2; AltName: Full=Tropinone reductase II; Short=TR-II && PF00106:short chain dehydrogenase	adh_short
Solyc05g012850.2.ITAG2.4	43.7157	61.0659	120.16	0.953184	11.9646	14.087	74.9807	9.00162	3.07017	3.48e-06	5.17e-05	Solyc05g012850.2	SL2.50ch05	5997592	5998721	-	1056	-	- && - && -	-
Solyc05g005750.2.ITAG2.4	12661	13012.2	9461	4085.35	3109.72	6955.97	11711.4	4717.01	1.31192	3.49e-06	5.17e-05	Solyc05g005750.2	SL2.50ch05	574848	578018	+	2939	-	- && Q9LRA7.1 RecName: Full=Probable alpha,alpha-trehalose-phosphate synthase [UDP-forming] 9; AltName: Full=Trehalose-6-phosphate synthase 9; Short=AtTPS9 && PF02358:Trehalose-phosphatase|PF00982:Glycosyltransferase family 20	-
Solyc05g050340.2.ITAG2.4	178.749	224.598	173.254	83.8802	65.2617	104.646	192.201	84.5961	1.18108	3.49e-06	5.17e-05	Solyc05g050340.2	SL2.50ch05	60452745	60454931	+	1277	-	- && Q9SHB5.1 RecName: Full=WRKY transcription factor 55; AltName: Full=WRKY DNA-binding protein 55 && PF03106:WRKY DNA -binding domain	WRKY
Solyc12g017530.1.ITAG2.4	83.5456	53.8208	142.516	21.9232	28.2801	13.0808	93.2941	21.0947	2.15003	3.52e-06	5.21e-05	Solyc12g017530.1	SL2.50ch12	6800110	6800403	+	294	-	- && - && -	-
Solyc02g077060.1.ITAG2.4	11.6575	63.136	63.3403	0.953184	2.17539	6.03729	46.0446	3.05529	3.91694	3.55e-06	5.24e-05	Solyc02g077060.1	SL2.50ch02	42122347	42122826	+	480	-	- && - && PF05659:Arabidopsis broad-spectrum mildew resistance protein RPW8	-
Solyc02g088350.2.ITAG2.4	322.525	302.225	424.753	204.935	146.839	153.951	349.834	168.575	1.05234	3.74e-06	5.51e-05	Solyc02g088350.2	SL2.50ch02	50473274	50477046	-	1528	-	- && - && PF12204:Domain of unknown function (DUF3598)	-
Solyc01g106780.2.ITAG2.4	825.742	874.588	559.817	1695.71	1213.87	1749.81	753.382	1553.13	-1.04427	3.75e-06	5.52e-05	Solyc01g106780.2	SL2.50ch01	94549920	94553673	+	2228	-	- && Q43117.1 RecName: Full=Pyruvate kinase isozyme A, chloroplastic; Flags: Precursor && PF02887:Pyruvate kinase, alpha/beta domain|PF00224:Pyruvate kinase, barrel domain	PK
Solyc05g012010.2.ITAG2.4	310.867	386.061	280.374	120.101	122.91	192.187	325.767	145.066	1.16633	3.78e-06	5.56e-05	Solyc05g012010.2	SL2.50ch05	5212785	5215956	+	1084	-	- && Q8LE94.1 RecName: Full=E3 ubiquitin-protein ligase At3g02290; AltName: Full=RING finger protein At3g02290 && PF13639:Ring finger domain	-
Solyc07g006770.2.ITAG2.4	129.204	241.159	81.9699	12.3914	14.14	49.3046	150.778	25.2787	2.57491	3.86e-06	5.67e-05	Solyc07g006770.2	SL2.50ch07	1617784	1621648	-	3422	-	- && Q1MX30.1 RecName: Full=Receptor kinase-like protein Xa21; Contains: RecName: Full=Receptor kinase-like protein Xa21, processed; Flags: Precursor && PF08263:Leucine rich repeat N-terminal domain|PF15102:TMEM154 protein family|PF13855:Leucine rich repeat|PF00069:Protein kinase domain	Pkinase
Solyc05g052250.2.ITAG2.4	13.6005	3.10505	4.65738	54.3315	78.3141	28.174	7.12096	53.6065	-2.90673	4.02e-06	5.87e-05	Solyc05g052250.2	SL2.50ch05	62517875	62520667	+	942	-	- && O22874.1 RecName: Full=Expansin-A8; Short=AtEXPA8; AltName: Full=Alpha-expansin-8; Short=At-EXP8; Short=AtEx8; AltName: Full=Ath-ExpAlpha-1.11; Flags: Precursor && PF01357:Pollen allergen|PF03330:Rare lipoprotein A (RlpA)-like double-psi beta-barrel	-
Solyc09g011600.2.ITAG2.4	225.379	901.499	690.223	130.586	162.067	192.187	605.7	161.613	1.90614	4.02e-06	5.87e-05	Solyc09g011600.2	SL2.50ch09	4868723	4870339	+	1033	-	- && P32111.1 RecName: Full=Probable glutathione S-transferase; AltName: Full=Pathogenesis-related protein 1 && PF00043:Glutathione S-transferase, C-terminal domain|PF13417:Glutathione S-transferase, N-terminal domain	GST_C
Solyc08g007240.2.ITAG2.4	236.065	218.388	317.633	85.7866	103.331	141.876	257.362	110.331	1.22325	4.04e-06	5.89e-05	Solyc08g007240.2	SL2.50ch08	1824235	1828359	+	1614	-	- && Q8L7W2.2 RecName: Full=Nudix hydrolase 8; Short=AtNUDT8 && PF00293:NUDIX domain	NUDIX
Solyc01g099370.2.ITAG2.4	2005.09	5252.7	7579.42	257.36	441.604	897.544	4945.74	532.169	3.21626	4.12e-06	6e-05	Solyc01g099370.2	SL2.50ch01	89659021	89660415	+	1395	-	- && O04023.1 RecName: Full=Protein SRC2 homolog; Short=AtSRC2 && PF00168:C2 domain	C2
Solyc02g032170.2.ITAG2.4	69.9452	51.7508	48.4367	15.2509	8.70156	19.1181	56.7109	14.3569	1.97462	4.16e-06	6.04e-05	Solyc02g032170.2	SL2.50ch02	27785825	27786719	-	369	-	- && - && -	-
Solyc09g089550.2.ITAG2.4	132.119	111.782	136.927	59.0974	41.3324	61.3792	126.942	53.9363	1.23202	4.25e-06	6.16e-05	Solyc09g089550.2	SL2.50ch09	69252813	69257262	-	2770	-	- && Q9FRL5.1 RecName: Full=Zinc-finger homeodomain protein 5; Short=AtZHD5; AltName: Full=Homeobox protein 33; Short=AtHB-33 && PF04770:ZF-HD protein dimerisation region|PF14111:Domain of unknown function (DUF4283)	ZF-HD_dimer
Solyc03g115070.1.ITAG2.4	193.321	361.22	385.631	115.335	96.8049	144.895	313.391	119.012	1.39606	4.26e-06	6.18e-05	Solyc03g115070.1	SL2.50ch03	64897617	64899524	+	1908	-	- && Q9FGH9.1 RecName: Full=Exocyst complex component EXO70B1; Short=AtExo70b1; AltName: Full=Exocyst subunit Exo70 family protein B1 && PF03081:Exo70 exocyst complex subunit	Exo70
Solyc05g015850.2.ITAG2.4	11.6575	47.6107	112.709	6.67229	1.0877	3.01865	57.3256	3.59288	3.977	4.28e-06	6.19e-05	Solyc05g015850.2	SL2.50ch05	12420457	12423158	-	802	-	- && Q9FYA2.1 RecName: Full=Probable WRKY transcription factor 75; AltName: Full=WRKY DNA-binding protein 75 && PF03106:WRKY DNA -binding domain	WRKY
Solyc08g013760.1.ITAG2.4	32.0582	25.8754	51.2312	91.5057	106.594	115.715	36.3883	104.605	-1.51763	4.32e-06	6.25e-05	Solyc08g013760.1	SL2.50ch08	3236497	3237129	+	633	-	- && Q1PE04.1 RecName: Full=F-box/LRR-repeat protein 25 && -	-
Solyc03g078120.2.ITAG2.4	424.528	372.606	259.882	175.386	158.804	175.082	352.339	169.757	1.05246	4.37e-06	6.32e-05	Solyc03g078120.2	SL2.50ch03	50090927	50095668	-	803	-	- && Q9FY82.1 RecName: Full=NAC domain-containing protein 82; Short=ANAC082; AltName: Full=Protein VND-INTERACTING 1 && PF02365:No apical meristem (NAM) protein	NAM
Solyc06g005500.2.ITAG2.4	1307.59	2207.69	2093.03	766.36	817.947	1066.59	1869.43	883.632	1.08105	4.45e-06	6.43e-05	Solyc06g005500.2	SL2.50ch06	525975	529157	+	1809	-	- && Q06548.1 RecName: Full=Protein kinase APK1A, chloroplastic; Flags: Precursor && PF07714:Protein tyrosine kinase	Pkinase_Tyr
Solyc01g010430.2.ITAG2.4	695.566	791.787	1927.22	348.865	251.258	439.716	1138.19	346.613	1.71523	4.52e-06	6.53e-05	Solyc01g010430.2	SL2.50ch01	5338904	5342294	+	1261	-	- && - && PF04601:Domain of unknown function (DUF569)	-
Solyc09g011570.2.ITAG2.4	914.145	1101.26	1884.38	276.423	432.903	627.879	1299.93	445.735	1.54453	4.64e-06	6.68e-05	Solyc09g011570.2	SL2.50ch09	4857466	4858799	+	909	-	- && P32111.1 RecName: Full=Probable glutathione S-transferase; AltName: Full=Pathogenesis-related protein 1 && PF00043:Glutathione S-transferase, C-terminal domain|PF13417:Glutathione S-transferase, N-terminal domain	GST_C
Solyc11g071720.1.ITAG2.4	32.0582	37.2606	23.2869	99.1312	66.3494	120.746	30.8686	95.4088	-1.63315	4.67e-06	6.72e-05	Solyc11g071720.1	SL2.50ch11	55124295	55125857	+	969	-	- && Q9FG13.1 RecName: Full=Probable carboxylesterase 15; AltName: Full=AtCXE15 && PF07859:alpha/beta hydrolase fold	Abhydrolase_3
Solyc11g072140.1.ITAG2.4	82.5742	234.949	345.577	57.1911	27.1924	57.3543	221.033	47.2459	2.22366	4.68e-06	6.72e-05	Solyc11g072140.1	SL2.50ch11	55381579	55384132	-	2298	-	- && Q39191.2 RecName: Full=Wall-associated receptor kinase 1; Flags: Precursor && PF00069:Protein kinase domain|PF13947:Wall-associated receptor kinase galacturonan-binding	Pkinase
Solyc04g005170.1.ITAG2.4	272.98	131.447	97.8049	581.442	463.358	456.822	167.411	500.541	-1.58036	4.68e-06	6.72e-05	Solyc04g005170.1	SL2.50ch04	118047	118622	-	576	-	- && Q9CA46.1 RecName: Full=Basic leucine zipper 8; Short=AtbZIP8; Short=bZIP protein 8 && PF00170:bZIP transcription factor	bZIP_1
Solyc04g074920.2.ITAG2.4	111.718	101.432	123.886	223.045	319.782	199.231	112.345	247.353	-1.13635	4.68e-06	6.72e-05	Solyc04g074920.2	SL2.50ch04	60822366	60824071	+	1587	-	- && - && PF04577:Protein of unknown function (DUF563)	-
Solyc07g053910.2.ITAG2.4	2942.55	3642.22	3099.95	1452.65	1175.8	2102.99	3228.24	1577.15	1.03325	4.83e-06	6.9e-05	Solyc07g053910.2	SL2.50ch07	62315070	62321662	-	2523	-	- && F4I114.1 RecName: Full=Probable serine/threonine-protein kinase At1g09600 && PF00069:Protein kinase domain	Pkinase
Solyc05g052810.2.ITAG2.4	1906.98	1356.91	1970.07	3253.22	4387.76	2844.57	1744.65	3495.18	-1.00218	4.84e-06	6.91e-05	Solyc05g052810.2	SL2.50ch05	62986641	62988843	-	713	-	- && Q9C912.1 RecName: Full=60S ribosomal protein L35a-3 && PF01247:Ribosomal protein L35Ae	-
Solyc12g036390.1.ITAG2.4	299.21	895.289	1219.3	153.463	180.557	285.765	804.6	206.595	1.96158	4.89e-06	6.97e-05	Solyc12g036390.1	SL2.50ch12	52390662	52393456	+	1359	-	- && Q9C9T2.1 RecName: Full=Protein SAR DEFICIENT 1 && PF07887:Calmodulin binding protein-like	-
Solyc08g066320.2.ITAG2.4	160.291	268.069	281.306	86.7398	84.8402	116.721	236.555	96.1003	1.29919	4.97e-06	7.07e-05	Solyc08g066320.2	SL2.50ch08	54842828	54845106	+	2186	-	- && Q9SGP2.1 RecName: Full=Receptor-like protein kinase HSL1; AltName: Full=Protein HAESA-LIKE1; Flags: Precursor && PF00069:Protein kinase domain|PF13855:Leucine rich repeat	Pkinase
Solyc02g031790.1.ITAG2.4	9.71461	72.4511	27.9443	0	2.17539	1.00622	36.7033	1.06054	5.15765	5e-06	7.1e-05	Solyc02g031790.1	SL2.50ch02	26993451	26997012	+	3225	-	- && Q1MX30.1 RecName: Full=Receptor kinase-like protein Xa21; Contains: RecName: Full=Receptor kinase-like protein Xa21, processed; Flags: Precursor && PF00069:Protein kinase domain|PF13855:Leucine rich repeat|PF12799:Leucine Rich repeats (2 copies)	Pkinase
Solyc07g005920.1.ITAG2.4	1047.23	1160.25	700.47	447.997	261.047	493.046	969.319	400.696	1.27352	5.04e-06	7.15e-05	Solyc07g005920.1	SL2.50ch07	752031	755067	-	2193	-	- && Q9ZUI0.1 RecName: Full=Putative leucine-rich repeat receptor-like serine/threonine-protein kinase At2g24130; Flags: Precursor && PF00069:Protein kinase domain|PF08263:Leucine rich repeat N-terminal domain|PF13855:Leucine rich repeat	Pkinase
Solyc07g054170.2.ITAG2.4	278.809	362.255	151.831	673.901	596.057	709.382	264.298	659.78	-1.32113	5.06e-06	7.17e-05	Solyc07g054170.2	SL2.50ch07	62529846	62533102	+	1182	-	- && Q9M0I2.2 RecName: Full=Expansin-B3; Short=At-EXPB3; Short=AtEXPB3; AltName: Full=Ath-ExpBeta-1.6; AltName: Full=Beta-expansin-3; Flags: Precursor && PF01357:Pollen allergen|PF03330:Rare lipoprotein A (RlpA)-like double-psi beta-barrel	-
Solyc10g008150.1.ITAG2.4	144.748	444.022	459.217	103.897	64.174	114.709	349.329	94.2599	1.88857	5.14e-06	7.28e-05	Solyc10g008150.1	SL2.50ch10	2281545	2281874	+	330	-	- && Q9SGP6.1 RecName: Full=Glutaredoxin-C9; Short=AtGrxC9; AltName: Full=Protein ROXY 19 && -	-
Solyc12g055710.1.ITAG2.4	83.5456	157.322	195.61	30.5019	30.4555	59.3667	145.493	40.108	1.85864	5.2e-06	7.34e-05	Solyc12g055710.1	SL2.50ch12	61681187	61681951	-	765	-	- && P0C035.1 RecName: Full=RING-H2 finger protein ATL60; AltName: Full=RING-type E3 ubiquitin transferase ATL60 && PF13639:Ring finger domain	-
Solyc05g051800.2.ITAG2.4	1650.51	2165.25	1477.32	833.083	702.651	1095.77	1764.36	877.168	1.00785	5.32e-06	7.48e-05	Solyc05g051800.2	SL2.50ch05	62177598	62181170	+	1167	-	- && O60103.1 RecName: Full=ERAD-associated E3 ubiquitin-protein ligase doa10 && PF12906:RING-variant domain	-
Solyc08g005880.2.ITAG2.4	148.633	179.058	128.544	359.35	367.641	243.504	152.078	323.499	-1.09004	5.38e-06	7.56e-05	Solyc08g005880.2	SL2.50ch08	674510	680860	+	1833	-	- && Q8W488.1 RecName: Full=Protein DETOXIFICATION 21; Short=AtDTX21; AltName: Full=Multidrug and toxic compound extrusion protein 21; Short=MATE protein 21 && PF01554:MatE	MatE
Solyc04g076680.2.ITAG2.4	207.893	283.594	191.884	109.616	87.0156	117.727	227.79	104.786	1.11753	5.4e-06	7.58e-05	Solyc04g076680.2	SL2.50ch04	61579839	61585726	+	539	-	- && Q6EP49.2 RecName: Full=MADS-box transcription factor 27; AltName: Full=OsMADS27; AltName: Full=RMADS218 && -	-
Solyc09g011420.2.ITAG2.4	1452.33	1091.94	1743.72	2814.75	3594.83	2346.5	1429.33	2918.69	-1.02967	5.54e-06	7.76e-05	Solyc09g011420.2	SL2.50ch09	4751658	4754252	+	637	-	- && Q6P8E9.1 RecName: Full=NHP2-like protein 1; AltName: Full=High mobility group-like nuclear protein 2 homolog 1; AltName: Full=U4/U6.U5 small nuclear ribonucleoprotein SNU13; AltName: Full=U4/U6.U5 tri-snRNP 15.5 kDa protein && PF01248:Ribosomal protein L7Ae/L30e/S12e/Gadd45 family	-
Solyc08g013770.2.ITAG2.4	20.4007	13.4552	29.8072	69.5825	94.6295	60.3729	21.221	74.8616	-1.81031	5.59e-06	7.81e-05	Solyc08g013770.2	SL2.50ch08	3236887	3237852	+	850	-	- && - && -	-
Solyc01g104030.2.ITAG2.4	34.9726	41.4006	40.9849	111.523	76.1387	154.957	39.1194	114.206	-1.54734	5.62e-06	7.84e-05	Solyc01g104030.2	SL2.50ch01	92494277	92499952	-	2841	-	- && Q38898.1 RecName: Full=Potassium channel AKT2/3 && PF00520:Ion transport protein|PF12796:Ankyrin repeats (3 copies)|PF11834:KHA, dimerisation domain of potassium ion channel|PF00027:Cyclic nucleotide-binding domain	Ion_trans
Solyc06g031710.2.ITAG2.4	25.258	31.0505	33.5331	117.242	97.8926	61.3792	29.9472	92.1711	-1.62211	5.64e-06	7.87e-05	Solyc06g031710.2	SL2.50ch06	20809015	20811730	+	1406	-	- && O80638.1 RecName: Full=WAT1-related protein At2g39510 && PF00892:EamA-like transporter family	DUF6
Solyc06g008270.2.ITAG2.4	104.918	67.276	92.2161	20.9701	33.7186	34.2113	88.1366	29.6333	1.57817	5.65e-06	7.87e-05	Solyc06g008270.2	SL2.50ch06	2139308	2142190	-	2739	-	- && O82318.1 RecName: Full=Probably inactive leucine-rich repeat receptor-like protein kinase At2g25790; Flags: Precursor && PF13855:Leucine rich repeat|PF08263:Leucine rich repeat N-terminal domain	LRRNT_2
Solyc12g096720.1.ITAG2.4	45.6587	34.1555	39.122	8.57866	8.70156	10.0622	39.6454	9.11413	2.12176	5.66e-06	7.88e-05	Solyc12g096720.1	SL2.50ch12	65522757	65523228	+	429	-	- && Q9ASS4.1 RecName: Full=Probably inactive leucine-rich repeat receptor-like protein kinase At5g48380; Flags: Precursor && PF07714:Protein tyrosine kinase	Pkinase_Tyr
Solyc12g009450.1.ITAG2.4	406.071	411.936	284.1	168.714	138.137	210.299	367.369	172.383	1.0901	5.73e-06	7.98e-05	Solyc12g009450.1	SL2.50ch12	2714559	2719247	+	2931	-	- && Q6L400.1 RecName: Full=Putative late blight resistance protein homolog R1B-16 && PF00931:NB-ARC domain	NB-ARC
Solyc09g007890.1.ITAG2.4	171.949	224.598	176.98	60.0506	41.3324	100.622	191.176	67.3349	1.50285	5.77e-06	8.02e-05	Solyc09g007890.1	SL2.50ch09	1413536	1415858	-	2160	-	- && P26600.1 RecName: Full=Phenylalanine ammonia-lyase; Short=PAL && PF00221:Aromatic amino acid lyase	-
Solyc08g005090.1.ITAG2.4	65.0879	89.0113	211.445	25.736	13.0523	34.2113	121.848	24.3332	2.32129	5.84e-06	8.12e-05	Solyc08g005090.1	SL2.50ch08	62416	63240	-	825	-	- && - && -	-
Solyc05g049990.2.ITAG2.4	35.944	43.4707	36.3275	96.2716	80.4895	135.839	38.5808	104.2	-1.43602	6.1e-06	8.43e-05	Solyc05g049990.2	SL2.50ch05	59846285	59848623	+	741	-	- && O03982.1 RecName: Full=Heavy metal-associated isoprenylated plant protein 39; Short=AtHIP39; Flags: Precursor && -	-
Solyc08g082090.1.ITAG2.4	485.73	733.826	1120.57	262.126	256.696	377.331	780.041	298.718	1.38485	6.24e-06	8.6e-05	Solyc08g082090.1	SL2.50ch08	64988056	64988547	+	492	-	- && - && -	-
Solyc01g068000.2.ITAG2.4	536.246	715.196	1015.31	345.053	337.186	377.331	755.584	353.19	1.09733	6.37e-06	8.78e-05	Solyc01g068000.2	SL2.50ch01	77051714	77056722	+	1626	-	- && Q6AUQ4.1 RecName: Full=Probable protein phosphatase 2C 47; Short=OsPP2C47 && PF00481:Protein phosphatase 2C	PP2C
Solyc05g005040.2.ITAG2.4	432.3	322.925	217.965	135.352	139.225	142.883	324.397	139.153	1.2208	6.39e-06	8.79e-05	Solyc05g005040.2	SL2.50ch05	58049	62049	-	1466	-	- && Q949Z1.1 RecName: Full=Polygalacturonase At1g48100; Short=PG; AltName: Full=Pectinase At1g48100; Flags: Precursor && PF00295:Glycosyl hydrolases family 28	-
Solyc10g083170.1.ITAG2.4	13.6005	8.28013	9.31476	44.7997	47.8586	36.2238	10.3984	42.9607	-2.04388	6.7e-06	9.19e-05	Solyc10g083170.1	SL2.50ch10	63039551	63041524	-	858	-	- && Q94KL8.1 RecName: Full=Secoisolariciresinol dehydrogenase && PF00106:short chain dehydrogenase	adh_short
Solyc05g009640.2.ITAG2.4	48.573	156.287	100.599	14.2978	18.4908	32.1989	101.82	21.6625	2.23247	6.73e-06	9.21e-05	Solyc05g009640.2	SL2.50ch05	3847068	3849452	+	930	-	- && Q1PF17.1 RecName: Full=Transcription factor bHLH18; AltName: Full=Basic helix-loop-helix protein 18; Short=AtbHLH18; Short=bHLH 18; AltName: Full=Transcription factor EN 28; AltName: Full=bHLH transcription factor bHLH018 && PF00010:Helix-loop-helix DNA-binding domain	HLH
Solyc06g053840.2.ITAG2.4	888.887	1116.78	1968.21	564.285	538.409	568.512	1324.63	557.069	1.2498	6.9e-06	9.43e-05	Solyc06g053840.2	SL2.50ch06	36715476	36716766	+	1048	-	- && P33077.2 RecName: Full=Auxin-responsive protein IAA4; AltName: Full=Auxin-induced protein AUX2-11; AltName: Full=Indoleacetic acid-induced protein 4 && PF02309:AUX/IAA family	-
Solyc03g120550.2.ITAG2.4	974.375	2076.24	1721.37	430.839	441.604	837.171	1590.66	569.872	1.4808	6.92e-06	9.44e-05	Solyc03g120550.2	SL2.50ch03	68921264	68926102	+	2415	-	- && Q9M817.1 RecName: Full=Protein NRT1/ PTR FAMILY 1.2; Short=AtNPF1.2; AltName: Full=Nitrate transporter 1.11 && PF00854:POT family	-
Solyc07g008630.1.ITAG2.4	34.0011	34.1555	40.0534	6.67229	5.43848	10.0622	36.07	7.39097	2.28362	7.06e-06	9.61e-05	Solyc07g008630.1	SL2.50ch07	3574842	3577907	-	3066	-	- && - && PF08263:Leucine rich repeat N-terminal domain|PF13855:Leucine rich repeat	LRRNT_2
Solyc02g089630.2.ITAG2.4	97.1461	149.042	421.027	41.9401	31.5432	63.3916	222.405	45.625	2.28487	7.09e-06	9.65e-05	Solyc02g089630.2	SL2.50ch02	51379832	51382530	-	1949	-	- && Q6NKX1.1 RecName: Full=Proline dehydrogenase 2, mitochondrial; AltName: Full=Osmotic stress-induced proline dehydrogenase; AltName: Full=Proline oxidase; Flags: Precursor && PF01619:Proline dehydrogenase	-
Solyc07g056200.2.ITAG2.4	146.691	826.978	1040.46	49.5656	65.2617	70.4351	671.375	61.7541	3.44279	7.15e-06	9.71e-05	Solyc07g056200.2	SL2.50ch07	64047159	64048119	-	733	-	- && - && -	-
Solyc05g052520.2.ITAG2.4	152.519	471.967	464.806	64.8165	58.7356	141.876	363.098	88.4762	2.03646	7.24e-06	9.82e-05	Solyc05g052520.2	SL2.50ch05	62746398	62748712	-	1535	-	- && O80871.1 RecName: Full=Probable protein phosphatase 2C 25; Short=AtPP2C25; AltName: Full=Protein phosphatase AP2C1 && PF00481:Protein phosphatase 2C	PP2C
Solyc01g068410.2.ITAG2.4	9.71461	14.4902	4.65738	43.8465	75.051	35.2176	9.62073	51.3717	-2.4248	7.4e-06	0.000100175	Solyc01g068410.2	SL2.50ch01	77668365	77671367	+	1385	-	- && Q9FFD0.2 RecName: Full=Auxin efflux carrier component 5; Short=AtPIN5 && PF03547:Membrane transport protein	-
Solyc03g116700.2.ITAG2.4	34.9726	50.7158	120.16	11.4382	15.2277	11.0684	68.6162	12.5781	2.45277	7.43e-06	0.00010042	Solyc03g116700.2	SL2.50ch03	65992869	65993698	+	729	-	- && P29602.3 RecName: Full=Cucumber peeling cupredoxin; Short=CPC; AltName: Full=Stellacyanin && PF02298:Plastocyanin-like domain	Cu_bind_like
Solyc09g082720.2.ITAG2.4	86.46	97.2915	113.64	175.386	233.855	194.2	99.1305	201.147	-1.01861	7.43e-06	0.00010042	Solyc09g082720.2	SL2.50ch09	68418568	68421971	-	1369	-	- && Q3L181.1 RecName: Full=Perakine reductase && PF00248:Aldo/keto reductase family	Aldo_ket_red
Solyc07g054430.2.ITAG2.4	476.987	496.808	514.175	299.3	174.031	269.666	495.99	247.666	1.00011	7.47e-06	0.00010082	Solyc07g054430.2	SL2.50ch07	62745940	62748554	+	1116	-	- && Q6KZM5.1 RecName: Full=Glutamate formimidoyltransferase; AltName: Full=5-formyltetrahydrofolate cyclo-ligase; AltName: Full=Glutamate formiminotransferase; AltName: Full=Glutamate formyltransferase && PF07837:Formiminotransferase domain, N-terminal subdomain	-
Solyc03g006830.2.ITAG2.4	19.4292	30.0155	23.2869	72.442	70.7002	63.3916	24.2439	68.8446	-1.50924	7.48e-06	0.00010082	Solyc03g006830.2	SL2.50ch03	1331841	1343493	+	1034	-	- && Q9FIS1.1 RecName: Full=MADS-box protein AGL42; AltName: Full=Protein AGAMOUS-LIKE 42; AltName: Full=Protein FOREVER YOUNG FLOWER && PF01486:K-box region|PF00319:SRF-type transcription factor (DNA-binding and dimerisation domain)	SRF-TF
Solyc08g083240.2.ITAG2.4	5291.55	3565.63	7437.83	2211.39	2885.66	2067.77	5431.67	2388.27	1.18557	7.67e-06	0.000103087	Solyc08g083240.2	SL2.50ch08	65757263	65759544	-	1804	-	- && - && PF13178:Protein of unknown function (DUF4005)	-
Solyc01g014730.1.ITAG2.4	14.5719	8.28013	24.2184	0	0	0	15.6901	0	6.39725	7.7e-06	0.000103297	Solyc01g014730.1	SL2.50ch01	14781780	14782057	-	78	-	- && - && -	-
Solyc06g070910.2.ITAG2.4	537.218	351.905	462.943	1106.65	1223.66	680.202	450.689	1003.5	-1.15439	7.71e-06	0.000103348	Solyc06g070910.2	SL2.50ch06	43552368	43554839	+	422	-	- && Q9CA64.1 RecName: Full=Transcription factor PRE3; AltName: Full=Basic helix-loop-helix protein 135; Short=AtbHLH135; Short=bHLH 135; AltName: Full=Protein ACTIVATION-TAGGED BRI1 SUPPRESSOR 1; Short=ATBS1; AltName: Full=Protein PACLOBUTRAZOL RESISTANCE 3; AltName: Full=Protein TARGET OF MOOPTEROS 7; AltName: Full=Transcription factor EN 67; AltName: Full=bHLH transcription factor bHLH135 && -	-
Solyc01g007800.2.ITAG2.4	45.6587	33.1205	35.3961	96.2716	129.436	80.4973	38.0584	102.068	-1.42062	7.74e-06	0.000103635	Solyc01g007800.2	SL2.50ch01	1955327	1956217	+	891	-	- && Q3EAL1.1 RecName: Full=Transcription repressor OFP6; AltName: Full=Ovate family protein 6; Short=AtOFP6 && PF04844:Transcriptional repressor, ovate	-
Solyc12g097080.1.ITAG2.4	1113.29	1455.23	655.759	2710.86	2047.04	2881.8	1074.76	2546.57	-1.24491	7.82e-06	0.000104542	Solyc12g097080.1	SL2.50ch12	65724976	65726110	-	666	-	- && Q03664.1 RecName: Full=Probable glutathione S-transferase; AltName: Full=Auxin-induced protein PCNT103 && PF02798:Glutathione S-transferase, N-terminal domain	GST_N
Solyc08g065950.1.ITAG2.4	720.824	801.102	1441.92	433.699	326.309	468.897	987.95	409.635	1.26997	7.83e-06	0.000104695	Solyc08g065950.1	SL2.50ch08	54296385	54296546	+	162	-	- && Q9M0G2.1 RecName: Full=Zinc finger CCCH domain-containing protein 49; Short=AtC3H49 && -	-
Solyc11g011740.1.ITAG2.4	55.3733	68.311	96.8735	20.0169	19.5785	28.174	73.5193	22.5898	1.70294	7.89e-06	0.000105298	Solyc11g011740.1	SL2.50ch11	4715457	4715987	+	531	-	- && Q8LDC8.2 RecName: Full=Ethylene-responsive transcription factor 1B; Short=AtERF1B; AltName: Full=Ethylene-responsive element-binding factor 1B; Short=EREBP-1B && PF00847:AP2 domain	AP2
Solyc09g011490.2.ITAG2.4	223.436	542.348	564.474	98.178	151.19	181.119	443.419	143.495	1.62835	8e-06	0.000106413	Solyc09g011490.2	SL2.50ch09	4809980	4811002	-	882	-	- && Q03662.1 RecName: Full=Probable glutathione S-transferase; AltName: Full=Auxin-induced protein PGNT1/PCNT110 && PF00043:Glutathione S-transferase, C-terminal domain|PF02798:Glutathione S-transferase, N-terminal domain	GST_N
Solyc10g085860.1.ITAG2.4	89.3744	167.673	195.61	38.1274	50.034	61.3792	150.886	49.8468	1.59932	8e-06	0.000106413	Solyc10g085860.1	SL2.50ch10	64906642	64908126	-	1485	-	- && Q9SCP6.1 RecName: Full=UDP-glycosyltransferase 73D1 && PF00201:UDP-glucoronosyl and UDP-glucosyl transferase	UDPGT
Solyc11g011070.1.ITAG2.4	171.949	213.213	162.077	74.3484	71.7879	104.646	182.413	83.5942	1.12416	8.02e-06	0.000106413	Solyc11g011070.1	SL2.50ch11	4151926	4157337	-	849	-	- && - && -	-
Solyc07g014690.2.ITAG2.4	32.0582	42.4356	17.698	4.76592	0	3.01865	30.7306	2.59486	3.52797	8.02e-06	0.000106413	Solyc07g014690.2	SL2.50ch07	5103988	5106992	+	1688	-	- && Q84TI7.1 RecName: Full=Sodium transporter HKT1; Short=AtHKT1 && PF02386:Cation transport protein	-
Solyc06g061190.1.ITAG2.4	246.751	430.567	440.588	122.008	98.9803	195.206	372.635	138.731	1.42466	8.08e-06	0.000106984	Solyc06g061190.1	SL2.50ch06	39193327	39194433	-	1107	-	- && O82170.1 RecName: Full=Protein HAIKU1; AltName: Full=MPK3/6-targeted VQ-motif-containing protein 9; AltName: Full=VQ motif-containing protein 14; Short=AtVQ14 && PF05678:VQ motif	-
Solyc05g050510.2.ITAG2.4	69.9452	104.537	76.381	24.7828	27.1924	36.2238	83.6209	29.3996	1.50695	8.27e-06	0.000109185	Solyc05g050510.2	SL2.50ch05	60646184	60647227	-	393	-	- && Q9T096.2 RecName: Full=Protein yippee-like At4g27745 && PF03226:Yippee zinc-binding/DNA-binding /Mis18, centromere assembly	-
Solyc01g005220.2.ITAG2.4	476.987	672.76	827.15	258.313	171.856	357.207	658.966	262.458	1.32746	8.61e-06	0.000113143	Solyc01g005220.2	SL2.50ch01	173559	180636	+	2282	-	- && Q8L612.1 RecName: Full=MACPF domain-containing protein At1g14780 && PF01823:MAC/Perforin domain	-
Solyc02g070530.2.ITAG2.4	20.4007	28.9804	37.259	0	5.43848	2.01243	28.88	2.48364	3.58575	8.71e-06	0.00011441	Solyc02g070530.2	SL2.50ch02	40261306	40264437	-	2262	-	- && Q39128.2 RecName: Full=Potassium channel KAT1 && PF11834:KHA, dimerisation domain of potassium ion channel|PF00520:Ion transport protein|PF00027:Cyclic nucleotide-binding domain	Ion_trans
Solyc01g090340.2.ITAG2.4	309.896	181.128	311.113	570.957	712.44	484.996	267.379	589.465	-1.13919	8.77e-06	0.000115056	Solyc01g090340.2	SL2.50ch01	84028843	84029830	-	988	-	- && Q40476.1 RecName: Full=Ethylene-responsive transcription factor 1; Short=NtERF1; AltName: Full=Ethylene-responsive element-binding factor 1; Short=EREBP-1 && PF00847:AP2 domain	AP2
Solyc09g091160.1.ITAG2.4	238.979	265.999	354.892	117.242	126.173	165.019	286.624	136.145	1.07473	8.79e-06	0.000115237	Solyc09g091160.1	SL2.50ch09	70493938	70494246	+	309	-	- && - && -	-
Solyc02g080560.1.ITAG2.4	78.6883	110.747	164.871	281.189	315.432	252.56	118.102	283.06	-1.25944	8.84e-06	0.000115829	Solyc02g080560.1	SL2.50ch02	44754457	44754753	-	297	-	- && - && -	-
Solyc03g093790.2.ITAG2.4	100.06	110.747	61.4774	191.59	203.399	211.305	90.7615	202.098	-1.15749	8.94e-06	0.000116908	Solyc03g093790.2	SL2.50ch03	55471344	55474938	+	1020	-	- && O80513.1 RecName: Full=Cyclin-U4-1; Short=CycU4;1; AltName: Full=Cyclin-P4.1; Short=CycP4;1 && PF08613:Cyclin	-
Solyc09g014990.2.ITAG2.4	440.072	983.265	1421.43	208.747	179.47	409.53	948.256	265.916	1.83416	8.96e-06	0.000117202	Solyc09g014990.2	SL2.50ch09	7395473	7398361	+	1761	-	- && Q6IEQ7.1 RecName: Full=WRKY transcription factor WRKY24; Short=OsWRKY24 && PF03106:WRKY DNA -binding domain	WRKY
Solyc06g035760.2.ITAG2.4	12.629	13.4552	1.86295	65.7697	42.4201	51.317	9.31571	53.1689	-2.52562	9.08e-06	0.000118421	Solyc06g035760.2	SL2.50ch06	24907105	24908892	+	1695	-	- && Q9FXW4.1 RecName: Full=Probable (S)-N-methylcoclaurine 3'-hydroxylase isozyme 2; AltName: Full=Cytochrome P450 80B2 && PF00067:Cytochrome P450	p450
Solyc02g092970.2.ITAG2.4	43.7157	31.0505	74.518	2.85955	13.0523	8.04973	49.7614	7.98721	2.65803	9.14e-06	0.000118942	Solyc02g092970.2	SL2.50ch02	53920842	53921843	+	592	-	- && P0DH91.1 RecName: Full=ADP-ribosylation factor 2-B; Short=AtARF2; AltName: Full=ARF1-like protein U5 >Q9LQC8.2 RecName: Full=ADP-ribosylation factor 2-A; Short=AtARF2 && PF00025:ADP-ribosylation factor family	Arf
Solyc06g065340.1.ITAG2.4	284.638	174.918	200.267	523.298	435.078	393.43	219.941	450.602	-1.03455	9.27e-06	0.000120488	Solyc06g065340.1	SL2.50ch06	40759642	40760316	-	675	-	- && - && PF05097:Protein of unknown function (DUF688)	-
Solyc08g014350.1.ITAG2.4	165.148	125.237	172.323	342.193	400.272	245.517	154.236	329.327	-1.09271	9.43e-06	0.000122308	Solyc08g014350.1	SL2.50ch08	4185941	4186486	-	546	-	- && - && -	-
Solyc10g078920.1.ITAG2.4	120.461	87.9763	155.556	34.3146	30.4555	57.3543	121.331	40.7081	1.57555	9.58e-06	0.000124026	Solyc10g078920.1	SL2.50ch10	60569743	60571691	+	561	-	- && Q9FG36.3 RecName: Full=Thioredoxin-like 3-1, chloroplastic; AltName: Full=Thioredoxin WCRKC-1; Flags: Precursor && PF00085:Thioredoxin	-
Solyc02g063480.2.ITAG2.4	301.153	336.38	478.778	834.989	808.158	607.754	372.104	750.3	-1.01117	9.6e-06	0.000124139	Solyc02g063480.2	SL2.50ch02	35563319	35564936	+	1526	-	- && P13917.2 RecName: Full=Basic 7S globulin; AltName: Full=SBg7S; Short=Bg; Contains: RecName: Full=Basic 7S globulin high kDa subunit; Contains: RecName: Full=Basic 7S globulin low kDa subunit; Flags: Precursor && PF14541:Xylanase inhibitor C-terminal|PF14543:Xylanase inhibitor N-terminal	-
Solyc02g070090.1.ITAG2.4	225.379	269.104	333.468	145.837	67.4371	113.702	275.984	108.992	1.33751	1.01e-05	0.00012954	Solyc02g070090.1	SL2.50ch02	39928195	39929799	-	1605	-	- && Q9SA85.1 RecName: Full=Berberine bridge enzyme-like 8; Short=AtBBE-like 8; Flags: Precursor && PF01565:FAD binding domain|PF08031:Berberine and berberine like	FAD_binding_4
Solyc08g065940.2.ITAG2.4	1609.71	1892.01	2972.34	969.388	953.909	1174.25	2158.02	1032.52	1.06363	1.01e-05	0.000129639	Solyc08g065940.2	SL2.50ch08	54295446	54296305	-	532	-	- && O82199.1 RecName: Full=Zinc finger CCCH domain-containing protein 20; Short=AtC3H20 && -	-
Solyc09g092010.1.ITAG2.4	38.8584	103.502	111.777	19.0637	23.9293	19.1181	84.7124	20.7037	2.03489	1.06e-05	0.00013515	Solyc09g092010.1	SL2.50ch09	71187491	71187676	+	186	-	- && O48837.2 RecName: Full=Receptor like protein kinase S.2; Short=LecRK-S.2 && -	-
Solyc01g098060.1.ITAG2.4	58.2876	10.3502	25.1498	1.90637	2.17539	0	31.2625	1.36059	4.53121	1.07e-05	0.000136807	Solyc01g098060.1	SL2.50ch01	88658634	88659092	-	459	-	- && - && PF00319:SRF-type transcription factor (DNA-binding and dimerisation domain)	SRF-TF
Solyc08g075430.2.ITAG2.4	1142.44	813.522	598.939	1765.3	1647.86	1764.9	851.633	1726.02	-1.01931	1.09e-05	0.000138518	Solyc08g075430.2	SL2.50ch08	59564208	59567305	-	2334	-	- && Q9C6W5.1 RecName: Full=ABC transporter G family member 14; Short=ABC transporter ABCG.14; Short=AtABCG14; AltName: Full=White-brown complex homolog protein 14; Short=AtWBC14 && PF01061:ABC-2 type transporter|PF00005:ABC transporter	ABC2_membrane
Solyc01g100240.2.ITAG2.4	332.24	841.468	1005.06	186.824	182.733	313.939	726.256	227.832	1.67241	1.09e-05	0.000138958	Solyc01g100240.2	SL2.50ch01	90311230	90315662	-	2355	-	- && C0SV51.1 RecName: Full=Calmodulin-binding protein 60 C && PF07887:Calmodulin binding protein-like	-
Solyc09g011140.2.ITAG2.4	430.357	633.43	251.498	1266.78	863.63	1295	438.428	1141.8	-1.38175	1.1e-05	0.000140009	Solyc09g011140.2	SL2.50ch09	4499977	4502723	+	967	-	- && P50165.1 RecName: Full=Tropinone reductase homolog; AltName: Full=P29X && PF00106:short chain dehydrogenase	adh_short
Solyc04g025650.2.ITAG2.4	2451	2331.89	5021.58	1273.45	1529.3	1267.83	3268.16	1356.86	1.26838	1.11e-05	0.000140723	Solyc04g025650.2	SL2.50ch04	21358605	21363095	+	1388	-	- && Q6F6Y2.1 RecName: Full=FAD-dependent urate hydroxylase; AltName: Full=Flavoprotein urate hydroxylase && PF01494:FAD binding domain	FAD_binding_3
Solyc02g083310.2.ITAG2.4	599.391	690.355	870.93	280.236	289.327	454.81	720.225	341.458	1.07682	1.11e-05	0.000140815	Solyc02g083310.2	SL2.50ch02	46764249	46767892	-	1144	-	- && Q6YZM6.1 RecName: Full=Bifunctional nuclease 2; Short=OsBBD2 && PF02577:Bifunctional nuclease	-
Solyc02g094400.2.ITAG2.4	2339.28	2900.11	5491.98	1077.1	1146.43	1796.1	3577.12	1339.87	1.41675	1.13e-05	0.000142979	Solyc02g094400.2	SL2.50ch02	54931796	54933814	+	1514	-	- && Q9SGA2.1 RecName: Full=Glycerophosphodiester phosphodiesterase GDPD1, chloroplastic; AltName: Full=Glycerophosphodiester phosphodiesterase 1; Short=AtGDPD1; AltName: Full=Protein SENESCENCE-RELATED GENE 3; Flags: Precursor && PF03009:Glycerophosphoryl diester phosphodiesterase family	-
Solyc11g066880.1.ITAG2.4	324.468	275.314	188.158	101.991	139.225	110.684	262.647	117.3	1.16408	1.13e-05	0.000143038	Solyc11g066880.1	SL2.50ch11	52677842	52678807	-	297	-	- && Q8LA14.2 RecName: Full=Putative phytosulfokines 6; Short=AtPSK3_2; Short=AtPSK6; Contains: RecName: Full=Phytosulfokine-alpha-like; Short=PSK-alpha-like; Short=Phytosulfokine-a-like; Contains: RecName: Full=Phytosulfokine-beta; Short=PSK-beta; Short=Phytosulfokine-b; Flags: Precursor && -	-
Solyc09g005260.2.ITAG2.4	71.8881	104.537	49.3682	203.981	190.347	164.013	75.2643	186.114	-1.30991	1.14e-05	0.000143505	Solyc09g005260.2	SL2.50ch09	191528	195466	-	1769	-	- && Q93Z81.1 RecName: Full=Vacuolar cation/proton exchanger 3; AltName: Full=Ca(2+)/H(+) antiporter CAX3; AltName: Full=Ca(2+)/H(+) exchanger 3; AltName: Full=Protein CATION EXCHANGER 3 && PF01699:Sodium/calcium exchanger protein	Na_Ca_ex
Solyc03g120390.2.ITAG2.4	82.5742	115.922	139.721	39.0806	45.6832	48.2984	112.739	44.354	1.34768	1.14e-05	0.000143505	Solyc03g120390.2	SL2.50ch03	68810304	68811853	+	1111	-	- && P93830.2 RecName: Full=Auxin-responsive protein IAA17; AltName: Full=Auxin response 3; AltName: Full=Indoleacetic acid-induced protein 17 && PF02309:AUX/IAA family	-
Solyc08g014490.1.ITAG2.4	17.4863	33.1205	19.561	93.4121	50.034	124.771	23.3893	89.4056	-1.94048	1.14e-05	0.000143617	Solyc08g014490.1	SL2.50ch08	4620881	4622191	-	1311	-	- && Q9ZTK5.1 RecName: Full=Deacetylvindoline O-acetyltransferase; AltName: Full=Acetyl-coenzyme A:deacetylvindoline 4-O-acetyltransferase && PF02458:Transferase family	-
Solyc07g064370.1.ITAG2.4	48.573	30.0155	26.0813	0	7.61387	3.01865	34.8899	3.54417	3.33655	1.15e-05	0.000144583	Solyc07g064370.1	SL2.50ch07	66557477	66559327	+	1578	-	- && - && PF10536:Plant mobile domain	-
Solyc02g092520.1.ITAG2.4	68.9737	53.8208	39.122	11.4382	7.61387	19.1181	53.9722	12.7234	2.07885	1.17e-05	0.000146701	Solyc02g092520.1	SL2.50ch02	53586071	53589494	+	444	-	- && - && -	-
Solyc02g084170.1.ITAG2.4	40.8014	80.7312	45.6423	11.4382	16.3154	14.087	55.725	13.9469	2.0004	1.17e-05	0.000146701	Solyc02g084170.1	SL2.50ch02	47348168	47352538	-	606	-	- && Q8L5Y6.1 RecName: Full=Cullin-associated NEDD8-dissociated protein 1; AltName: Full=Cullin-associated and neddylation-dissociated protein 1; Short=AtCAND1; AltName: Full=Protein ENHANCER OF TIR1-1 AUXIN RESISTANCE 2; AltName: Full=Protein HEMIVENATA && -	-
Solyc01g073780.2.ITAG2.4	1055.98	1280.31	946.379	501.375	397.009	703.345	1094.22	533.91	1.03467	1.17e-05	0.000146701	Solyc01g073780.2	SL2.50ch01	81152883	81154238	-	1356	-	- && - && -	-
Solyc01g095770.2.ITAG2.4	135.033	390.201	1972.87	32.4083	32.6309	44.2735	832.7	36.4375	4.51431	1.17e-05	0.000147283	Solyc01g095770.2	SL2.50ch01	86959607	86963216	-	2340	-	- && Q9LD40.2 RecName: Full=Putative cyclic nucleotide-gated ion channel 13; AltName: Full=Cyclic nucleotide- and calmodulin-regulated ion channel 13 && PF00520:Ion transport protein	Ion_trans
Solyc04g024430.2.ITAG2.4	549.847	476.107	656.69	223.045	227.328	359.219	560.881	269.864	1.05566	1.19e-05	0.000149144	Solyc04g024430.2	SL2.50ch04	31292828	31295815	-	872	-	- && - && -	-
Solyc11g012660.1.ITAG2.4	83.5456	143.867	40.9849	335.521	194.697	515.182	89.4659	348.467	-1.96412	1.21e-05	0.000151172	Solyc11g012660.1	SL2.50ch11	5432721	5437270	+	1683	-	- && Q8GYX3.1 RecName: Full=Microtubule-associated protein 70-5; Short=AtMAP70-5; AltName: Full=70 kDa microtubule-associated protein 5 && PF07058:Microtubule-associated protein 70	-
Solyc10g081770.1.ITAG2.4	29.1438	53.8208	84.7643	6.67229	15.2277	10.0622	55.9096	10.6541	2.4025	1.21e-05	0.00015132	Solyc10g081770.1	SL2.50ch10	62771278	62774496	-	1689	-	- && - && -	-
Solyc08g081240.2.ITAG2.4	885.001	1399.34	1237	549.987	451.394	715.419	1173.78	572.267	1.03599	1.22e-05	0.000152881	Solyc08g081240.2	SL2.50ch08	64293572	64297990	-	1940	-	- && Q9SRE5.1 RecName: Full=Uncharacterized protein At1g76660 && -	-
Solyc09g092480.1.ITAG2.4	24.2865	114.887	153.693	7.62547	8.70156	23.143	97.6222	13.1567	2.89114	1.25e-05	0.0001562	Solyc09g092480.1	SL2.50ch09	71561182	71562588	+	1407	-	- && F8WKW0.1 RecName: Full=Crocetin glucosyltransferase, chloroplastic; AltName: Full=UDP-glucose glucosyltransferase 1; Short=GjUGT1; AltName: Full=UDP-glycosyltransferase 75L6; Flags: Precursor && PF00201:UDP-glucoronosyl and UDP-glucosyl transferase	UDPGT
Solyc06g053620.2.ITAG2.4	91.3173	112.817	62.4089	183.011	201.224	198.224	88.8476	194.153	-1.13054	1.27e-05	0.000157688	Solyc06g053620.2	SL2.50ch06	36452913	36454428	-	1063	-	- && Q9SPK4.1 RecName: Full=Phosphoenolpyruvate carboxylase kinase 1; Short=AtPPCK1 && PF00069:Protein kinase domain	Pkinase
Solyc03g043740.2.ITAG2.4	407.042	394.341	206.788	662.463	789.667	769.755	336.057	740.628	-1.14065	1.27e-05	0.000157727	Solyc03g043740.2	SL2.50ch03	7270735	7271823	-	764	-	- && Q9LSK9.1 RecName: Full=Uncharacterized protein At5g65660 && -	-
Solyc03g098660.2.ITAG2.4	319.611	663.445	941.722	167.76	228.416	261.616	641.592	219.264	1.5495	1.29e-05	0.000159948	Solyc03g098660.2	SL2.50ch03	60960457	60962305	+	1018	-	- && Q9FTA0.1 RecName: Full=GEM-like protein 4 && PF02893:GRAM domain	GRAM
Solyc01g091870.2.ITAG2.4	40.8014	55.8908	49.3682	11.4382	8.70156	18.1119	48.6868	12.7506	1.9279	1.3e-05	0.000161349	Solyc01g091870.2	SL2.50ch01	85412558	85419368	+	2215	-	- && Q93ZQ5.2 RecName: Full=SPX domain-containing membrane protein At4g22990 && PF07690:Major Facilitator Superfamily|PF03105:SPX domain	MFS_1
Solyc01g005410.2.ITAG2.4	198.178	209.073	196.541	80.0675	126.173	91.5656	201.264	99.2686	1.02315	1.3e-05	0.000161473	Solyc01g005410.2	SL2.50ch01	286564	290172	+	869	-	- && Q9CAB7.1 RecName: Full=Probable peroxygenase 4; Short=AtPXG4; AltName: Full=Caleosin-4 && PF05042:Caleosin related protein	-
Solyc04g074780.2.ITAG2.4	447.843	582.714	1053.5	263.079	301.292	276.709	694.685	280.36	1.30965	1.33e-05	0.000165267	Solyc04g074780.2	SL2.50ch04	60696043	60700688	-	1012	-	- && - && -	-
Solyc02g067610.1.ITAG2.4	744.139	1026.74	1660.82	266.892	344.799	591.655	1143.9	401.115	1.51208	1.36e-05	0.000167738	Solyc02g067610.1	SL2.50ch02	37748769	37749092	+	324	-	- && - && -	-
Solyc02g089880.2.ITAG2.4	4.8573	9.31514	9.31476	29.5487	38.0693	42.2611	7.82907	36.6264	-2.22572	1.36e-05	0.000167738	Solyc02g089880.2	SL2.50ch02	51571186	51572659	+	1365	-	- && Q9S7G2.1 RecName: Full=Probable galacturonosyltransferase-like 2 && PF01501:Glycosyl transferase family 8	Glyco_transf_8
Solyc03g020050.2.ITAG2.4	35.944	22.7703	50.2997	7.62547	1.0877	6.03729	36.338	4.91682	2.86611	1.36e-05	0.000167881	Solyc03g020050.2	SL2.50ch03	61174085	61175022	+	775	-	- && Q43502.1 RecName: Full=Proteinase inhibitor type-2 CEVI57; AltName: Full=Proteinase inhibitor type II CEVI57; Flags: Precursor && PF02428:Potato type II proteinase inhibitor family	-
Solyc08g006770.2.ITAG2.4	384.698	416.076	287.826	142.978	88.1033	202.249	362.867	144.443	1.32709	1.37e-05	0.000168656	Solyc08g006770.2	SL2.50ch08	1336526	1338769	-	1371	-	- && Q9ZSA7.1 RecName: Full=Protein DMR6-LIKE OXYGENASE 2; AltName: Full=2-oxoglutarate (2OG)-Fe(II) oxygenase-like protein DLO2; AltName: Full=Salicylate 3-hydroxylase DLO2; Short=S3H DLO2; Short=SA 3-hydroxylase DLO2; Short=Salicylic acid 3-hydroxylase DLO2 && PF03171:2OG-Fe(II) oxygenase superfamily|PF14226:non-haem dioxygenase in morphine synthesis N-terminal	2OG-FeII_Oxy
Solyc01g066710.2.ITAG2.4	38.8584	37.2606	27.0128	95.3184	69.6125	112.696	34.3773	92.5424	-1.43253	1.37e-05	0.000169024	Solyc01g066710.2	SL2.50ch01	74873035	74873666	-	557	-	- && Q8S8T4.1 RecName: Full=UDP-glucuronic acid decarboxylase 4; AltName: Full=UDP-XYL synthase 4; AltName: Full=UDP-glucuronate decarboxylase 4; Short=UGD; Short=UXS-4 && PF16363:GDP-mannose 4,6 dehydratase	-
Solyc06g053490.2.ITAG2.4	203.035	171.813	248.704	405.103	555.812	342.113	207.851	434.343	-1.0616	1.38e-05	0.000169952	Solyc06g053490.2	SL2.50ch06	36286848	36294425	+	789	-	- && - && PF05811:Eukaryotic protein of unknown function (DUF842)	-
Solyc08g036590.1.ITAG2.4	20.4007	20.7003	17.698	56.2379	56.5602	56.3481	19.5997	56.382	-1.52611	1.41e-05	0.000173047	Solyc08g036590.1	SL2.50ch08	10904330	10906283	-	690	-	- && Q3HRP0.1 RecName: Full=Calcineurin B-like protein 7 && PF13499:EF-hand domain pair	-
Solyc02g068900.2.ITAG2.4	1461.08	2522.33	2532.68	1218.17	834.262	1043.45	2172.03	1031.96	1.07338	1.41e-05	0.000173806	Solyc02g068900.2	SL2.50ch02	38779435	38783709	+	1329	-	- && P42620.1 RecName: Full=Glutathionyl-hydroquinone reductase YqjG; Short=GS-HQR && PF13409:Glutathione S-transferase, N-terminal domain|PF13410:Glutathione S-transferase, C-terminal domain	-
Solyc09g075540.1.ITAG2.4	181.663	228.738	287.826	101.991	117.471	119.74	232.743	113.067	1.04292	1.44e-05	0.000176317	Solyc09g075540.1	SL2.50ch09	67233996	67236118	-	1959	-	- && Q8GZ17.2 RecName: Full=COBRA-like protein 7; Flags: Precursor && PF04833:COBRA-like protein	-
Solyc07g056210.2.ITAG2.4	7.77169	45.5407	23.2869	0	1.0877	0	25.5331	0.362565	6.13266	1.46e-05	0.00017884	Solyc07g056210.2	SL2.50ch07	64055352	64056480	-	477	-	- && - && -	-
Solyc01g073890.2.ITAG2.4	149.605	242.194	381.905	81.9738	88.1033	106.659	257.901	92.2453	1.48394	1.46e-05	0.000179283	Solyc01g073890.2	SL2.50ch01	81215509	81217001	+	1382	-	- && - && PF03107:C1 domain|PF07649:C1-like domain	C1_3
Solyc00g034810.1.ITAG2.4	23.3151	13.4552	1.86295	60.0506	73.9633	100.622	12.8777	78.2118	-2.60711	1.47e-05	0.000179283	Solyc00g034810.1	SL2.50ch00	12856697	12858684	-	690	-	- && Q3HRP0.1 RecName: Full=Calcineurin B-like protein 7 && -	-
Solyc01g087040.2.ITAG2.4	111.718	99.3615	117.366	46.706	40.2447	58.3605	109.482	48.4371	1.17539	1.48e-05	0.000180512	Solyc01g087040.2	SL2.50ch01	81964948	81965916	+	969	-	- && P82658.2 RecName: Full=Thylakoid lumenal 19 kDa protein, chloroplastic; AltName: Full=P19; Flags: Precursor && PF01789:PsbP	-
Solyc01g107980.2.ITAG2.4	606.191	1207.86	1277.98	280.236	370.904	533.294	1030.68	394.812	1.38452	1.49e-05	0.000182189	Solyc01g107980.2	SL2.50ch01	95361899	95363459	-	1561	-	- && Q9FXA4.1 RecName: Full=U-box domain-containing protein 26; AltName: Full=Plant U-box protein 26 && PF04564:U-box domain	U-box
Solyc02g092720.1.ITAG2.4	61.202	101.432	68.9292	226.858	133.787	217.343	77.1876	192.662	-1.32309	1.53e-05	0.000186534	Solyc02g092720.1	SL2.50ch02	53711432	53712349	+	918	-	- && - && -	-
Solyc04g009960.2.ITAG2.4	89.3744	132.482	209.582	47.6592	57.6479	32.1989	143.813	45.8353	1.65219	1.54e-05	0.000187144	Solyc04g009960.2	SL2.50ch04	3280106	3284080	+	1316	-	- && Q8RXU4.1 RecName: Full=Probable low-specificity L-threonine aldolase 1; AltName: Full=Threonine aldolase 1 && PF01212:Beta-eliminating lyase	Beta_elim_lyase
Solyc02g090460.2.ITAG2.4	55.3733	109.712	78.2439	21.9232	30.4555	26.1616	81.1096	26.1801	1.63329	1.63e-05	0.000196542	Solyc02g090460.2	SL2.50ch02	52001947	52002405	+	377	-	- && - && -	-
Solyc01g010350.2.ITAG2.4	50.516	45.5407	35.3961	105.803	85.9279	129.802	43.8176	107.178	-1.29318	1.66e-05	0.000199728	Solyc01g010350.2	SL2.50ch01	5153980	5158097	-	1390	-	- && Q9FTT3.1 RecName: Full=Triose phosphate/phosphate translocator TPT, chloroplastic; Flags: Precursor && PF03151:Triose-phosphate Transporter family	-
Solyc04g074330.2.ITAG2.4	55.3733	65.206	17.698	154.416	141.4	171.057	46.0924	155.624	-1.75984	1.66e-05	0.000200371	Solyc04g074330.2	SL2.50ch04	60334734	60336668	+	1581	-	- && F8WLS6.1 RecName: Full=7-deoxyloganetin glucosyltransferase; AltName: Full=Iridoid 1-O-glucosyltransferase; AltName: Full=UDP-glucose glucosyltransferase 6; Short=CrUGT6; AltName: Full=UDP-glycosyltransferase 85A23 && PF00201:UDP-glucoronosyl and UDP-glucosyl transferase	UDPGT
Solyc04g078840.2.ITAG2.4	911.23	1073.31	632.472	393.665	379.606	520.214	872.338	431.161	1.01616	1.68e-05	0.00020197	Solyc04g078840.2	SL2.50ch04	63500731	63504038	-	1712	-	- && Q9M7Q4.1 RecName: Full=ABSCISIC ACID-INSENSITIVE 5-like protein 5; AltName: Full=ABA-responsive element-binding protein 1; AltName: Full=Abscisic acid responsive elements-binding factor 2; Short=ABRE-binding factor 2; AltName: Full=bZIP transcription factor 36; Short=AtbZIP36 && PF00170:bZIP transcription factor	bZIP_1
Solyc08g014360.1.ITAG2.4	27.2009	13.4552	18.6295	45.7528	72.8756	137.852	19.7619	85.4933	-2.11039	1.7e-05	0.000204199	Solyc08g014360.1	SL2.50ch08	4217825	4223907	-	1143	-	- && Q7XWU3.2 RecName: Full=Probable cinnamyl alcohol dehydrogenase 6; Short=OsCAD6 && PF00107:Zinc-binding dehydrogenase|PF08240:Alcohol dehydrogenase GroES-like domain	ADH_N
Solyc01g103580.2.ITAG2.4	550.818	1042.26	1100.07	289.768	378.518	467.89	897.717	378.725	1.24536	1.74e-05	0.000207843	Solyc01g103580.2	SL2.50ch01	92152884	92153909	+	806	-	- && - && PF05078:Protein of unknown function (DUF679)	-
Solyc03g121030.1.ITAG2.4	887.915	518.543	526.284	315.504	324.133	302.871	644.247	314.169	1.03625	1.74e-05	0.000208216	Solyc03g121030.1	SL2.50ch03	69257372	69269614	-	3423	-	- && Q0WVF8.1 RecName: Full=MMS19 nucleotide excision repair protein homolog; AltName: Full=MET18 homolog; AltName: Full=MMS19-like protein && PF14500:Dos2-interacting transcription regulator of RNA-Pol-II|PF12460:RNAPII transcription regulator C-terminal	-
Solyc08g041820.2.ITAG2.4	385.67	572.364	516.037	167.76	178.382	303.877	491.357	216.673	1.181	1.76e-05	0.000210023	Solyc08g041820.2	SL2.50ch08	25692517	25696868	-	1858	-	- && O04136.1 RecName: Full=Homeobox protein knotted-1-like 3; AltName: Full=KNAP3 && PF03790:KNOX1 domain|PF05920:Homeobox KN domain|PF03789:ELK domain|PF03791:KNOX2 domain	KNOX2
Solyc03g034410.1.ITAG2.4	552.761	960.495	625.02	367.929	321.958	373.306	712.759	354.398	1.00726	1.77e-05	0.000211542	Solyc03g034410.1	SL2.50ch03	6364810	6365325	+	516	-	- && - && PF14009:Domain of unknown function (DUF4228)	-
Solyc03g083470.2.ITAG2.4	418.7	779.367	804.795	153.463	158.804	360.225	667.62	224.164	1.57431	1.79e-05	0.000212823	Solyc03g083470.2	SL2.50ch03	53357967	53360163	-	2007	-	- && P93604.1 RecName: Full=Rust resistance kinase Lr10; AltName: Full=Probable receptor-like serine/threonine-protein kinase LRK10; Flags: Precursor && PF00069:Protein kinase domain	Pkinase
Solyc07g041940.2.ITAG2.4	664.479	1165.43	1138.26	383.18	214.276	521.22	989.39	372.892	1.40716	1.81e-05	0.000215359	Solyc07g041940.2	SL2.50ch07	54672988	54675245	+	1703	-	- && Q8GXZ3.1 RecName: Full=Serine/threonine-protein kinase At5g01020 && PF07714:Protein tyrosine kinase	Pkinase_Tyr
Solyc06g053910.2.ITAG2.4	432.3	644.815	617.568	181.105	143.576	335.07	564.894	219.917	1.36041	1.85e-05	0.000219463	Solyc06g053910.2	SL2.50ch06	36804547	36806703	-	1558	-	- && - && PF04720:PDDEXK-like family of unknown function	-
Solyc09g015770.2.ITAG2.4	922.888	3259.26	3634.62	182.058	270.836	522.226	2605.59	325.04	3.00296	1.86e-05	0.000220681	Solyc09g015770.2	SL2.50ch09	10987958	10989890	-	1239	-	- && Q93WU8.2 RecName: Full=Probable WRKY transcription factor 54; AltName: Full=WRKY DNA-binding protein 54 && PF03106:WRKY DNA -binding domain	WRKY
Solyc07g066550.2.ITAG2.4	1230.84	1290.66	911.915	446.09	424.201	744.6	1144.47	538.297	1.08791	1.92e-05	0.000227003	Solyc07g066550.2	SL2.50ch07	67935949	67943022	-	3122	-	- && C0LGH3.2 RecName: Full=Probable LRR receptor-like serine/threonine-protein kinase At1g56140; Flags: Precursor && PF13855:Leucine rich repeat|PF11721:Di-glucose binding within endoplasmic reticulum|PF07714:Protein tyrosine kinase	Pkinase_Tyr
Solyc06g007530.2.ITAG2.4	100.06	146.972	118.297	280.236	328.484	194.2	121.777	267.64	-1.13653	1.92e-05	0.000227119	Solyc06g007530.2	SL2.50ch06	1515845	1518702	-	1046	-	- && Q9FHB2.1 RecName: Full=Putative B3 domain-containing protein At5g58280 && PF02362:B3 DNA binding domain	B3
Solyc10g084960.1.ITAG2.4	16.5148	67.276	58.683	0.953184	2.17539	10.0622	47.4913	4.39691	3.43312	1.96e-05	0.000231516	Solyc10g084960.1	SL2.50ch10	64311825	64313183	+	666	-	- && Q03662.1 RecName: Full=Probable glutathione S-transferase; AltName: Full=Auxin-induced protein PGNT1/PCNT110 && PF13417:Glutathione S-transferase, N-terminal domain|PF00043:Glutathione S-transferase, C-terminal domain	GST_C
Solyc07g021340.2.ITAG2.4	48.573	32.0855	44.7108	94.3652	119.646	89.5532	41.7898	101.188	-1.27148	1.98e-05	0.000233999	Solyc07g021340.2	SL2.50ch07	16969514	16970157	+	458	-	- && - && -	-
Solyc04g072070.2.ITAG2.4	18.4578	22.7703	64.2718	0	3.26309	5.03108	35.1666	2.76472	3.68828	2.03e-05	0.000238602	Solyc04g072070.2	SL2.50ch04	59128902	59131685	-	922	-	- && Q93WU9.1 RecName: Full=Probable WRKY transcription factor 51; AltName: Full=WRKY DNA-binding protein 51 && PF03106:WRKY DNA -binding domain	WRKY
Solyc11g071830.1.ITAG2.4	57.3162	76.5912	57.7515	145.837	139.225	117.727	63.8863	134.263	-1.07411	2.05e-05	0.000240897	Solyc11g071830.1	SL2.50ch11	55181780	55184787	-	1257	-	- && P43644.1 RecName: Full=DnaJ protein homolog ANJ1; Flags: Precursor && PF00226:DnaJ domain|PF00684:DnaJ central domain|PF01556:DnaJ C terminal domain	DnaJ_C
Solyc02g087990.2.ITAG2.4	330.297	287.734	178.843	70.5356	64.174	141.876	265.625	92.1954	1.5256	2.06e-05	0.000242551	Solyc02g087990.2	SL2.50ch02	50222157	50225567	+	1913	-	- && - && PF07891:Protein of unknown function (DUF1666)	-
Solyc02g089900.1.ITAG2.4	1342.56	2234.6	2169.41	789.237	638.477	1157.15	1915.52	861.621	1.15241	2.06e-05	0.000242559	Solyc02g089900.1	SL2.50ch02	51584505	51586442	+	1938	-	- && O64825.1 RecName: Full=LysM domain receptor-like kinase 4; Short=LysM-containing receptor-like kinase 4; Flags: Precursor && PF00069:Protein kinase domain	Pkinase
Solyc08g067180.2.ITAG2.4	223.436	224.598	268.265	457.528	618.899	359.219	238.766	478.549	-1.00196	2.07e-05	0.0002428	Solyc08g067180.2	SL2.50ch08	56155346	56156822	-	695	-	- && - && PF00641:Zn-finger in Ran binding protein and others	zf-RanBP
Solyc00g206460.1.ITAG2.4	219.55	830.083	530.01	93.4121	121.822	213.318	526.547	142.851	1.88197	2.07e-05	0.0002428	Solyc00g206460.1	SL2.50ch00	19006504	19007274	-	771	-	- && Q9ZPE7.1 RecName: Full=Protein EXORDIUM; Flags: Precursor && PF04674:Phosphate-induced protein 1 conserved region	-
Solyc02g068820.1.ITAG2.4	41.7728	119.027	54.9571	14.2978	2.17539	17.1057	71.9189	11.1929	2.67192	2.11e-05	0.00024727	Solyc02g068820.1	SL2.50ch02	38727405	38731273	-	3315	-	- && C0LGP4.1 RecName: Full=Probable LRR receptor-like serine/threonine-protein kinase At3g47570; Flags: Precursor && PF13855:Leucine rich repeat|PF08263:Leucine rich repeat N-terminal domain|PF00069:Protein kinase domain	Pkinase
Solyc01g091760.2.ITAG2.4	6.80023	5.17508	0.931476	39.0806	22.8416	30.1865	4.30226	30.7029	-2.84968	2.12e-05	0.000248222	Solyc01g091760.2	SL2.50ch01	85341250	85342210	-	961	-	- && Q6J9S1.1 RecName: Full=Ethylene-responsive transcription factor RAP2-11; AltName: Full=Protein RELATED TO APETALA2 11 && PF00847:AP2 domain	AP2
Solyc04g077220.2.ITAG2.4	189.435	261.859	240.321	50.5188	56.5602	129.802	230.538	78.9603	1.54542	2.14e-05	0.000249958	Solyc04g077220.2	SL2.50ch04	62148603	62150431	-	1086	-	- && P46604.1 RecName: Full=Homeobox-leucine zipper protein HAT22; AltName: Full=Homeodomain-leucine zipper protein HAT22; Short=HD-ZIP protein 22 && PF00046:Homeobox domain|PF02183:Homeobox associated leucine zipper	Homeobox
Solyc06g019200.2.ITAG2.4	39.8299	39.3306	20.4925	2.85955	8.70156	4.02486	33.2176	5.19533	2.69442	2.16e-05	0.000252023	Solyc06g019200.2	SL2.50ch06	18148931	18153300	-	1443	-	- && B8AD72.1 RecName: Full=Probable zinc metalloprotease EGY2, chloroplastic; AltName: Full=Protein ETHYLENE-DEPENDENT GRAVITROPISM-DEFICIENT AND YELLOW-GREEN 2; Flags: Precursor && PF02163:Peptidase family M50	Peptidase_M50
Solyc10g005020.2.ITAG2.4	40.8014	68.311	51.2312	131.539	103.331	143.889	53.4478	126.253	-1.24383	2.17e-05	0.000252522	Solyc10g005020.2	SL2.50ch10	21051	22778	-	1222	-	- && - && PF14009:Domain of unknown function (DUF4228)	-
Solyc09g010980.1.ITAG2.4	73.831	194.583	450.834	23.8296	32.6309	72.4475	239.749	42.9693	2.48073	2.17e-05	0.000252562	Solyc09g010980.1	SL2.50ch09	4333240	4333467	+	228	-	- && - && -	-
Solyc06g054500.1.ITAG2.4	9.71461	7.24511	9.31476	58.1442	46.7709	23.143	8.75816	42.686	-2.28297	2.19e-05	0.000254432	Solyc06g054500.1	SL2.50ch06	37251017	37254140	-	978	-	- && Q9ZV04.1 RecName: Full=Peroxidase 24; Short=Atperox P24; AltName: Full=ATP47; Flags: Precursor && PF00141:Peroxidase	-
Solyc02g081980.2.ITAG2.4	44.6872	37.2606	42.8479	128.68	94.6295	81.5035	41.5985	101.604	-1.2887	2.21e-05	0.000255992	Solyc02g081980.2	SL2.50ch02	45730464	45734471	-	1729	-	- && P80595.2 RecName: Full=Apyrase; AltName: Full=ATP-diphosphatase; AltName: Full=ATP-diphosphohydrolase; AltName: Full=Adenosine diphosphatase; Short=ADPase && PF01150:GDA1/CD39 (nucleoside phosphatase) family	-
Solyc01g010770.2.ITAG2.4	147.662	185.268	110.846	40.9869	53.2971	76.4724	147.925	56.9188	1.37772	2.22e-05	0.000257546	Solyc01g010770.2	SL2.50ch01	5825560	5828696	-	1004	-	- && Q9FM19.1 RecName: Full=Hypersensitive-induced response protein 1; Short=AtHIR1 && PF01145:SPFH domain / Band 7 family	-
Solyc07g007920.1.ITAG2.4	47.6016	33.1205	27.9443	102.944	92.4541	80.4973	36.2221	91.9651	-1.34535	2.27e-05	0.000261929	Solyc07g007920.1	SL2.50ch07	2576653	2584770	-	3294	-	- && - && PF12231:Rap1-interacting factor 1 N terminal	-
Solyc01g110480.2.ITAG2.4	1718.51	2175.6	3120.44	923.636	950.646	1407.7	2338.19	1093.99	1.09584	2.29e-05	0.000264024	Solyc01g110480.2	SL2.50ch01	97179797	97182822	+	2331	-	- && Q04088.1 RecName: Full=Probable transcription factor PosF21; AltName: Full=bZIP transcription factor 59; Short=AtbZIP59 && PF00170:bZIP transcription factor	bZIP_1
Solyc10g084830.1.ITAG2.4	174.863	197.688	159.282	417.495	439.429	253.566	177.278	370.163	-1.06256	2.29e-05	0.000264024	Solyc10g084830.1	SL2.50ch10	64225452	64229482	-	1590	-	- && Q9SF09.1 RecName: Full=Amino acid transporter ANT1; AltName: Full=Aromatic and neutral amino acid transporter 1 && PF01490:Transmembrane amino acid transporter protein	Aa_trans
Solyc08g079980.1.ITAG2.4	2110.01	2135.24	1711.12	715.841	608.022	1308.08	1985.46	877.315	1.17811	2.29e-05	0.000264024	Solyc08g079980.1	SL2.50ch08	63360887	63363157	+	2271	-	- && O65351.1 RecName: Full=Subtilisin-like protease SBT1.7; AltName: Full=Cucumisin-like serine protease; AltName: Full=Subtilase subfamily 1 member 7; Short=AtSBT1.7; AltName: Full=Subtilisin-like serine protease 1; Short=At-SLP1; Flags: Precursor && PF02225:PA domain|PF05922:Peptidase inhibitor I9|PF00082:Subtilase family	Peptidase_S8
Solyc09g007680.2.ITAG2.4	598.42	688.285	331.605	1320.16	920.19	1671.32	539.437	1303.89	-1.27388	2.35e-05	0.000269558	Solyc09g007680.2	SL2.50ch09	1227123	1233091	-	1998	-	- && - && PF12906:RING-variant domain	-
Solyc06g064620.2.ITAG2.4	1237.64	1819.56	1333.87	729.186	530.795	912.638	1463.69	724.206	1.01464	2.35e-05	0.000269637	Solyc06g064620.2	SL2.50ch06	40267011	40270363	-	1879	-	- && Q67XZ3.2 RecName: Full=Beta-fructofuranosidase, insoluble isoenzyme CWINV3; AltName: Full=6-fructan exohydrolase; Short=6-FEH; AltName: Full=Beta-fructofuranosidase 5; Short=AtFruct5; AltName: Full=Cell wall beta-fructosidase 3; AltName: Full=Cell wall invertase 3; Short=AtcwINV3; AltName: Full=Sucrose hydrolase 3; Flags: Precursor && PF00251:Glycosyl hydrolases family 32 N-terminal domain|P…	-
Solyc03g063040.2.ITAG2.4	52.4589	48.6457	46.5738	118.195	143.576	86.5346	49.2261	116.102	-1.23676	2.36e-05	0.000270789	Solyc03g063040.2	SL2.50ch03	33035918	33037009	+	587	-	- && - && PF01490:Transmembrane amino acid transporter protein	Aa_trans
Solyc09g091370.2.ITAG2.4	95.2032	119.027	88.4902	175.386	243.644	189.169	100.907	202.733	-1.0069	2.36e-05	0.000270789	Solyc09g091370.2	SL2.50ch09	70665858	70670772	-	2960	-	- && - && PF14868:Domain of unknown function (DUF4487)	-
Solyc08g081820.2.ITAG2.4	1.94292	2.07003	2.79443	17.1573	36.9816	17.1057	2.26913	23.7482	-3.37824	2.43e-05	0.000277041	Solyc08g081820.2	SL2.50ch08	64762548	64765640	-	2306	-	- && Q9LUN4.1 RecName: Full=Cation/H(+) antiporter 19; AltName: Full=Protein CATION/H+ EXCHANGER 19; Short=AtCHX19 && PF00999:Sodium/hydrogen exchanger family	Na_H_Exchanger
Solyc03g122350.2.ITAG2.4	299.21	1061.93	1729.75	71.4888	126.173	159.988	1030.3	119.217	3.11169	2.44e-05	0.000278343	Solyc03g122350.2	SL2.50ch03	70227203	70229806	+	2072	-	- && Q9SBQ9.1 RecName: Full=Flavonoid 3'-monooxygenase; AltName: Full=Cytochrome P450 75B2; AltName: Full=Flavonoid 3'-hydroxylase [Petunia x hybrida] && PF00067:Cytochrome P450	p450
Solyc02g091260.1.ITAG2.4	127.261	152.147	53.0941	38.1274	30.4555	26.1616	110.834	31.5815	1.80817	2.44e-05	0.000278371	Solyc02g091260.1	SL2.50ch02	52614520	52614954	-	435	-	- && - && -	-
Solyc10g081980.1.ITAG2.4	1293.01	2952.9	3532.16	205.888	282.801	668.127	2592.69	385.605	2.74927	2.45e-05	0.000279235	Solyc10g081980.1	SL2.50ch10	62893899	62898988	+	678	-	- && Q9FNH6.1 RecName: Full=NDR1/HIN1-Like protein 3 && PF03168:Late embryogenesis abundant protein	-
Solyc10g046830.1.ITAG2.4	131.147	69.346	112.709	265.938	283.888	186.15	104.401	245.326	-1.23054	2.46e-05	0.000280065	Solyc10g046830.1	SL2.50ch10	37467628	37468425	+	798	-	- && Q54CJ4.1 RecName: Full=Elongation of fatty acids protein A; AltName: Full=3-keto acyl-CoA synthase eloA; AltName: Full=Fatty acid elongase A; AltName: Full=Very-long-chain 3-oxoacyl-CoA synthase A && PF01151:GNS1/SUR4 family	ELO
Solyc02g067600.1.ITAG2.4	195.264	303.26	424.753	93.4121	104.419	156.97	307.759	118.267	1.38018	2.51e-05	0.000284489	Solyc02g067600.1	SL2.50ch02	37744623	37744946	+	324	-	- && - && -	-
Solyc05g013480.2.ITAG2.4	231.208	161.462	149.036	84.8334	90.2787	83.5159	180.569	86.2093	1.06713	2.56e-05	0.000288798	Solyc05g013480.2	SL2.50ch05	6685702	6691461	-	1560	-	- && - && -	-
Solyc01g099160.2.ITAG2.4	23.3151	25.8754	22.3554	3.81274	2.17539	4.02486	23.8486	3.33766	2.82519	2.58e-05	0.000290935	Solyc01g099160.2	SL2.50ch01	89475688	89483138	+	2955	-	- && Q43191.1 RecName: Full=Probable linoleate 9S-lipoxygenase 5; AltName: Full=Leaf lipoxygenase && PF01477:PLAT/LH2 domain|PF00305:Lipoxygenase	Lipoxygenase
Solyc07g063090.1.ITAG2.4	188.463	180.093	271.059	368.882	551.462	392.424	213.205	437.589	-1.03553	2.59e-05	0.00029143	Solyc07g063090.1	SL2.50ch07	65667784	65668224	+	441	-	- && Q9LNN7.1 RecName: Full=Protein GRIM REAPER; AltName: Full=Stigma-specific STIG1-like protein GRI; Contains: RecName: Full=GRIp; Flags: Precursor && PF04885:Stigma-specific protein, Stig1	-
Solyc03g123620.2.ITAG2.4	3452.57	4866.64	8046.09	2460.17	2314.62	2548.74	5455.1	2441.18	1.16005	2.64e-05	0.00029671	Solyc03g123620.2	SL2.50ch03	70419509	70422663	-	2271	-	- && Q43111.1 RecName: Full=Pectinesterase 3; Short=PE 3; AltName: Full=Pectin methylesterase 3; Flags: Precursor && PF04043:Plant invertase/pectin methylesterase inhibitor|PF01095:Pectinesterase	-
Solyc08g068730.1.ITAG2.4	435.214	1239.95	1143.85	198.262	192.522	448.772	939.672	279.852	1.74731	2.66e-05	0.000299071	Solyc08g068730.1	SL2.50ch08	57869593	57870288	-	696	-	- && Q9SMB8.1 RecName: Full=Tyramine N-feruloyltransferase 4/11; AltName: Full=Hydroxycinnamoyl-CoA: tyramine N-hydroxycinnamoyltransferase && PF00583:Acetyltransferase (GNAT) family	Acetyltransf_1
Solyc06g082500.2.ITAG2.4	71.8881	54.8558	95.942	166.807	169.68	146.907	74.2286	161.132	-1.11468	2.71e-05	0.000304512	Solyc06g082500.2	SL2.50ch06	48289622	48295131	-	1534	-	- && Q8RXL8.1 RecName: Full=Uncharacterized membrane protein At1g06890 && PF03151:Triose-phosphate Transporter family	-
Solyc02g091800.2.ITAG2.4	170.006	143.867	81.0384	356.491	233.855	392.424	131.637	327.59	-1.31698	2.77e-05	0.000310496	Solyc02g091800.2	SL2.50ch02	53012555	53014066	+	1095	-	- && Q9T072.2 RecName: Full=Transcription factor bHLH25; AltName: Full=Basic helix-loop-helix protein 25; Short=AtbHLH25; Short=bHLH 25; AltName: Full=Transcription factor EN 29; AltName: Full=bHLH transcription factor bHLH025 && PF00010:Helix-loop-helix DNA-binding domain	HLH
Solyc12g094410.1.ITAG2.4	81.6027	126.272	67.9977	212.56	172.944	313.939	91.9574	233.148	-1.34498	2.79e-05	0.000312348	Solyc12g094410.1	SL2.50ch12	64631374	64635703	+	1710	-	- && F4JTP5.1 RecName: Full=Serine/threonine-protein kinase STY46; AltName: Full=Serine/threonine/tyrosine-protein kinase 46 && PF07714:Protein tyrosine kinase	Pkinase_Tyr
Solyc09g065780.2.ITAG2.4	47.6016	49.6808	108.983	21.9232	16.3154	15.0932	68.755	17.7773	1.95064	2.81e-05	0.000314457	Solyc09g065780.2	SL2.50ch09	64058148	64059751	-	1531	-	- && O48780.1 RecName: Full=3-ketoacyl-CoA synthase 11; Short=KCS-11; AltName: Full=Very long-chain fatty acid condensing enzyme 11; Short=VLCFA condensing enzyme 11 && PF08541:3-Oxoacyl-[acyl-carrier-protein (ACP)] synthase III C terminal|PF08392:FAE1/Type III polyketide synthase-like protein	-
Solyc06g083020.1.ITAG2.4	7.77169	7.24511	3.7259	29.5487	31.5432	30.1865	6.24757	30.4261	-2.29087	2.9e-05	0.000323071	Solyc06g083020.1	SL2.50ch06	48582623	48585571	-	1497	-	- && Q8L7B2.2 RecName: Full=Serine carboxypeptidase-like 20; Flags: Precursor && PF00450:Serine carboxypeptidase	Peptidase_S10
[truncated: 912 more rows]
