# Supplementary material for: The Tomato Transcription Factor SlNAC063 Is Required for Aluminum Tolerance by Regulating SlAAE3-1 Expression
Source: Front Plant Sci. 2022 Mar 15;13:826954. doi: 10.3389/fpls.2022.826954 (PMC8965521; doi:10.3389/fpls.2022.826954)
Supplement: Supplementary file 10 [file Table_6.xlsx]

## Sheet: Sheet1
Table S6. List of 45 Al-induced genes whose expression was repressed in slnac063 compared to WT plants under Al stress
ID	gene_id		gene_chr	gene_start	gene_end	gene_strand	gene_length	gene_biotype	gene_description
Solyc01g005160.2.ITAG2.4	Solyc01g005160.2	U-BOX DOMAIN-CONTAINING PROTEIN 54-RELATED	SL2.50ch01	137781	139489	+	1709	-	- && Q5PNY6.1 RecName: Full=U-box domain-containing protein 21; AltName: Full=Plant U-box protein 21 && PF04564:U-box domain
Solyc10g007280.2.ITAG2.4	Solyc10g007280.2	BCS1 AAA-TYPE ATPASE	SL2.50ch10	1683212	1684934	-	1632	-	- && Q8VZG2.1 RecName: Full=Protein HYPER-SENSITIVITY-RELATED 4; Short=AtHSR4; AltName: Full=BCS1-like protein && PF00004:ATPase family associated with various cellular activities (AAA)|PF14363:Domain associated at C-terminal with AAA
Solyc12g096840.1.ITAG2.4	Solyc12g096840.1	DIAMINE N-ACETYLTRANSFERASE	SL2.50ch12	65599549	65600393	-	708	-	- && Q9ZV06.1 RecName: Full=Probable acetyltransferase NATA1-like && PF00583:Acetyltransferase (GNAT) family
Solyc02g080890.2.ITAG2.4	Solyc02g080890.2	WRKY DNA -binding domain	SL2.50ch02	44991244	44993799	-	1999	-	- && Q9C519.1 RecName: Full=WRKY transcription factor 6; AltName: Full=WRKY DNA-binding protein 6; Short=AtWRKY6 && PF03106:WRKY DNA -binding domain
Solyc09g011520.2.ITAG2.4	Solyc09g011520.2	GLUTATHIONE S-TRANSFERASE	SL2.50ch09	4826832	4827949	-	1021	-	- && Q03662.1 RecName: Full=Probable glutathione S-transferase; AltName: Full=Auxin-induced protein PGNT1/PCNT110 && PF13417:Glutathione S-transferase, N-terminal domain|PF00043:Glutathione S-transferase, C-terminal domain
Solyc12g100260.1.ITAG2.4	Solyc12g100260.1	Transferred entry: 1.14.19.22	SL2.50ch12	67039003	67039167	+	165	-	- && P48630.1 RecName: Full=Omega-6 fatty acid desaturase, endoplasmic reticulum isozyme 1 && -
Solyc01g095770.2.ITAG2.4	Solyc01g095770.2	VOLTAGE AND LIGAND GATED POTASSIUM CHANNEL	SL2.50ch01	86959607	86963216	-	2340	-	- && Q9LD40.2 RecName: Full=Putative cyclic nucleotide-gated ion channel 13; AltName: Full=Cyclic nucleotide- and calmodulin-regulated ion channel 13 && PF00520:Ion transport protein
Solyc03g025720.2.ITAG2.4	Solyc03g025720.2	SlAAE3-1	SL2.50ch03	3134617	3138463	+	1977	-	- && Q9SMT7.1 RecName: Full=Oxalate--CoA ligase; AltName: Full=4-coumarate--CoA ligase isoform 8; Short=At4CL8; AltName: Full=4-coumarate--CoA ligase-like 10; AltName: Full=Acyl-activating enzyme 3; AltName: Full=Adenosine monophosphate binding protein 3; Short=AtMPBP3; AltName: Full=Oxalyl-CoA synthetase && PF00501:AMP-binding enzyme|PF13193:AMP-binding enzyme C-terminal domain
Solyc02g082920.2.ITAG2.4	Solyc02g082920.2	BASIC ENDOCHITINASE B	SL2.50ch02	46550982	46552140	+	1025	-	- && Q05539.1 RecName: Full=Acidic 26 kDa endochitinase; Flags: Precursor && PF00182:Chitinase class I
Solyc09g011990.1.ITAG2.4	Solyc09g011990.1	L-TYPE LECTIN-DOMAIN CONTAINING RECEPTOR KINASE IV.1-RELATED	SL2.50ch09	5263825	5265831	-	2007	-	- && O80939.1 RecName: Full=L-type lectin-domain containing receptor kinase IV.1; Short=Arabidopsis thaliana lectin-receptor kinase e; Short=AthlecRK-e; Short=LecRK-IV.1; AltName: Full=Lectin Receptor Kinase 1; Flags: Precursor && PF00069:Protein kinase domain|PF00139:Legume lectin domain
Solyc07g042430.1.ITAG2.4	Solyc07g042430.1	FLAVIN-CONTAINING MONOOXYGENASE 1-RELATED	SL2.50ch07	55578395	55580875	+	1542	-	- && Q9LMA1.1 RecName: Full=Probable flavin-containing monooxygenase 1 && PF00743:Flavin-binding monooxygenase-like
Solyc03g098730.1.ITAG2.4	Solyc03g098730.1	KUNITZ FAMILY TRYPSIN AND PROTEASE INHIBITOR PROTEIN-RELATED	SL2.50ch03	61007420	61008160	-	741	-	- && P13087.3 RecName: Full=Miraculin; Short=MIR; Flags: Precursor && PF00197:Trypsin and protease inhibitor
Solyc07g062480.1.ITAG2.4	Solyc07g062480.1	COMITIN	SL2.50ch07	65201305	65202198	-	894	-	- && Q39688.1 RecName: Full=Epidermis-specific secreted glycoprotein EP1; AltName: Full=52/54 kDa medium protein; Flags: Precursor && PF01453:D-mannose binding lectin
Solyc08g077910.2.ITAG2.4	Solyc08g077910.2	EXPANSIN-LIKE B1	SL2.50ch08	61812783	61815044	+	1019	-	- && O23547.2 RecName: Full=Expansin-like B1; Short=At-EXPR1; Short=AtEXLB1; Short=AtEXPR1; AltName: Full=Ath-ExpBeta-3.1; Flags: Precursor && PF03330:Rare lipoprotein A (RlpA)-like double-psi beta-barrel|PF01357:Pollen allergen
Solyc00g206460.1.ITAG2.4	Solyc00g206460.1	(PHI-1) PROTEIN, PUTATIVE-RELATED	SL2.50ch00	19006504	19007274	-	771	-	- && Q9ZPE7.1 RecName: Full=Protein EXORDIUM; Flags: Precursor && PF04674:Phosphate-induced protein 1 conserved region
Solyc04g048900.2.ITAG2.4	Solyc04g048900.2	calreticulin (CALR)	SL2.50ch04	38565211	38568669	+	1513	-	- && O04153.2 RecName: Full=Calreticulin-3; AltName: Full=Protein PRIORITY IN SWEET LIFE 1; Flags: Precursor && PF00262:Calreticulin family
Solyc07g056200.2.ITAG2.4	Solyc07g056200.2	COPPER TRANSPORT PROTEIN-RELATED	SL2.50ch07	64047159	64048119	-	733	-	- && - && -
Solyc05g051530.2.ITAG2.4	Solyc05g051530.2	Maltose-transporting ATPase	SL2.50ch05	61891814	61894245	-	1867	-	- && Q8RXN0.1 RecName: Full=ABC transporter G family member 11; Short=ABC transporter ABCG.11; Short=AtABCG11; AltName: Full=Protein CUTICULAR DEFECT AND ORGAN FUSION 1; AltName: Full=Protein DESPERADO; AltName: Full=Protein PERMEABLE LEAVES 1; AltName: Full=White-brown complex homolog protein 11; Short=AtWBC11 && PF00005:ABC transporter|PF01061:ABC-2 type transporter
Solyc07g049660.2.ITAG2.4	Solyc07g049660.2	(Z)-3-HEXEN-1-OL ACETYLTRANSFERASE	SL2.50ch07	60025565	60027595	+	1599	-	- && Q8GT20.1 RecName: Full=Benzyl alcohol O-benzoyltransferase; AltName: Full=Benzoyl coenzyme A:benzyl alcohol benzoyl transferase && PF02458:Transferase family
Solyc12g036390.1.ITAG2.4	Solyc12g036390.1	PROTEIN SAR DEFICIENT 1	SL2.50ch12	52390662	52393456	+	1359	-	- && Q9C9T2.1 RecName: Full=Protein SAR DEFICIENT 1 && PF07887:Calmodulin binding protein-like
Solyc11g005630.1.ITAG2.4	Solyc11g005630.1	Protein kinase domain (Pkinase)	SL2.50ch11	483096	485429	+	2334	-	- && Q25AG3.2 RecName: Full=G-type lectin S-receptor-like serine/threonine-protein kinase LECRK3; Short=OsLecRK3; AltName: Full=OsRLCK135; Flags: Precursor && PF00069:Protein kinase domain|PF01453:D-mannose binding lectin|PF00954:S-locus glycoprotein domain
Solyc01g107820.2.ITAG2.4	Solyc01g107820.2	Flavanone 7-O-beta-glucosyltransferase	SL2.50ch01	95232687	95234555	-	1869	-	- && Q9AT54.1 RecName: Full=Scopoletin glucosyltransferase; AltName: Full=Phenylpropanoid:glucosyltransferase 1 && PF00201:UDP-glucoronosyl and UDP-glucosyl transferase
Solyc10g078220.1.ITAG2.4	Solyc10g078220.1	coumaroylquinate(coumaroylshikimate) 3'-monooxygenase (CYP98A3, C3'H)	SL2.50ch10	60074003	60076372	-	1521	-	- && O22203.1 RecName: Full=Cytochrome P450 98A3; AltName: Full=Protein REDUCED EPIDERMAL FLUORESCENCE 8; AltName: Full=p-coumaroylshikimate/quinate 3'-hydrolxylase; Short=C3'H && PF00067:Cytochrome P450
Solyc03g116700.2.ITAG2.4	Solyc03g116700.2	Plastocyanin-like domain (Cu_bind_like)	SL2.50ch03	65992869	65993698	+	729	-	- && P29602.3 RecName: Full=Cucumber peeling cupredoxin; Short=CPC; AltName: Full=Stellacyanin && PF02298:Plastocyanin-like domain
Solyc11g018800.1.ITAG2.4	Solyc11g018800.1	PEROXIDASE 4-RELATED	SL2.50ch11	9597159	9598442	-	960	-	- && Q02200.1 RecName: Full=Lignin-forming anionic peroxidase; Flags: Precursor && PF00141:Peroxidase
Solyc01g079940.2.ITAG2.4	Solyc01g079940.2	ASPARTYL PROTEASES	SL2.50ch01	79094809	79097005	-	1584	-	- && P13917.2 RecName: Full=Basic 7S globulin; AltName: Full=SBg7S; Short=Bg; Contains: RecName: Full=Basic 7S globulin high kDa subunit; Contains: RecName: Full=Basic 7S globulin low kDa subunit; Flags: Precursor && PF14543:Xylanase inhibitor N-terminal|PF14541:Xylanase inhibitor C-terminal
Solyc09g090970.2.ITAG2.4	Solyc09g090970.2	Pathogenesis-related protein Bet v I family (Bet_v_1)	SL2.50ch09	70346085	70347506	-	794	-	- && P17642.1 RecName: Full=Pathogenesis-related protein STH-2 && PF00407:Pathogenesis-related protein Bet v I family
Solyc04g040130.1.ITAG2.4	Solyc04g040130.1	Delta(12)-fatty-acid desaturase	SL2.50ch04	12032700	12033827	+	1128	-	- && Q8GZC3.1 RecName: Full=Delta(12)-fatty-acid desaturase FAD2 && PF11960:Domain of unknown function (DUF3474)|PF00487:Fatty acid desaturase
Solyc01g089890.2.ITAG2.4	Solyc01g089890.2	Prenylated rab acceptor 1	SL2.50ch01	83603930	83604697	-	768	-	- && - && PF03208:PRA1 family protein
Solyc07g056000.2.ITAG2.4	Solyc07g056000.2	Xyloglucan-specific endo-beta-1,4-glucanase	SL2.50ch07	63901549	63902824	+	1098	-	- && Q38911.1 RecName: Full=Xyloglucan endotransglucosylase/hydrolase protein 15; Short=At-XTH15; Short=XTH-15; Flags: Precursor && PF00722:Glycosyl hydrolases family 16|PF06955:Xyloglucan endo-transglycosylase (XET) C-terminus
Solyc04g077230.1.ITAG2.4	Solyc04g077230.1	unknown	SL2.50ch04	62173911	62174135	+	225	-	- && - && -
Solyc09g091000.2.ITAG2.4	Solyc09g091000.2	Pathogenesis-related protein Bet v I family (Bet_v_1)	SL2.50ch09	70360338	70361437	+	793	-	- && P17642.1 RecName: Full=Pathogenesis-related protein STH-2 && PF00407:Pathogenesis-related protein Bet v I family
Solyc12g044940.1.ITAG2.4	Solyc12g044940.1	3-oxoacyl-[acyl-carrier-protein] reductase	SL2.50ch12	37589458	37590437	-	816	-	- && Q9WYG0.1 RecName: Full=Uncharacterized oxidoreductase TM_0325 && PF00106:short chain dehydrogenase
Solyc01g005500.2.ITAG2.4	Solyc01g005500.2	Secoisolariciresinol dehydrogenase	SL2.50ch01	344855	346514	+	967	-	- && Q94KL8.1 RecName: Full=Secoisolariciresinol dehydrogenase && PF00106:short chain dehydrogenase
Solyc07g055710.2.ITAG2.4	Solyc07g055710.2	DNA-BINDING PROTEIN-RELATED	SL2.50ch07	63648888	63650452	-	1477	-	- && Q9FK72.1 RecName: Full=Heat stress transcription factor A-4c; Short=AtHsfA4c; AltName: Full=AtHsf-20; AltName: Full=Protein ROOT HANDEDNESS 1 && PF00447:HSF-type DNA-binding
Solyc01g098590.2.ITAG2.4	Solyc01g098590.2	Phosphoglycerate mutase	SL2.50ch01	89070927	89072248	+	1144	-	- && Q9MAA2.1 RecName: Full=Phosphoglycerate mutase-like protein AT74; Short=At-74 && PF00300:Histidine phosphatase superfamily (branch 1)
Solyc07g062490.1.ITAG2.4	Solyc07g062490.1	COMITIN	SL2.50ch07	65208382	65209275	+	894	-	- && Q39688.1 RecName: Full=Epidermis-specific secreted glycoprotein EP1; AltName: Full=52/54 kDa medium protein; Flags: Precursor && PF01453:D-mannose binding lectin
Solyc01g100240.2.ITAG2.4	Solyc01g100240.2	Calmodulin binding protein-like (Calmodulin_bind)	SL2.50ch01	90311230	90315662	-	2355	-	- && C0SV51.1 RecName: Full=Calmodulin-binding protein 60 C && PF07887:Calmodulin binding protein-like
Solyc05g010020.2.ITAG2.4	Solyc05g010020.2	unknown	SL2.50ch05	4225071	4227064	-	502	-	- && - && -
Solyc11g006030.1.ITAG2.4	Solyc11g006030.1	U-BOX DOMAIN-CONTAINING PROTEIN 54-RELATED	SL2.50ch11	840424	841716	-	1293	-	- && Q5PNY6.1 RecName: Full=U-box domain-containing protein 21; AltName: Full=Plant U-box protein 21 && PF04564:U-box domain
Solyc02g068460.1.ITAG2.4	Solyc02g068460.1	VQ motif (VQ)	SL2.50ch02	38401854	38402432	-	579	-	- && Q9LIE6.1 RecName: Full=VQ motif-containing protein 22; Short=AtVQ22 && PF05678:VQ motif
Solyc09g011510.2.ITAG2.4	Solyc09g011510.2	GLUTATHIONE S-TRANSFERASE	SL2.50ch09	4820455	4821500	-	839	-	- && Q03664.1 RecName: Full=Probable glutathione S-transferase; AltName: Full=Auxin-induced protein PCNT103 && PF00043:Glutathione S-transferase, C-terminal domain
Solyc03g122340.2.ITAG2.4	Solyc03g122340.2	LIPOXYGENASE 3	SL2.50ch03	70218660	70223113	+	3088	-	- && O24371.1 RecName: Full=Linoleate 13S-lipoxygenase 3-1, chloroplastic; Flags: Precursor && PF00305:Lipoxygenase|PF01477:PLAT/LH2 domain
Solyc12g096960.1.ITAG2.4	Solyc12g096960.1	Pathogenesis-related protein Bet v I family (Bet_v_1)	SL2.50ch12	65664355	65665560	+	477	-	- && P17642.1 RecName: Full=Pathogenesis-related protein STH-2 && PF00407:Pathogenesis-related protein Bet v I family
Solyc01g107090.2.ITAG2.4	Solyc01g107090.2	unknown	SL2.50ch01	94729625	94730330	-	706	-	- && - && -
